# Supplementary material for: Healthy lifestyle behaviors are major predictors of mental wellbeing during COVID-19 pandemic confinement: A study on adult Arabs in higher educational institutions
Source: PubMed Central journal article supplement (PMC7735567; doi:10.1371/journal.pone.0243524), 2020-12-14
Supplement: pone.0243524.s001.pdf [file pone.0243524.s001.pdf]

| Subject | Age   | Weight | Height | BMI   | BMI_C | Residence | Education | Marital_Status | Smoking | Chronic_Dise | Gender | Health | Sitting_Time | PA_Min_Day | IPAQ_C | Dietary_Score | Dietary_C | PSQI_Total | Sleep_C | WHO5_Total | WHO5_Total100 | WHO5_Class |
|---------|-------|--------|--------|-------|-------|-----------|-----------|----------------|---------|--------------|--------|--------|--------------|------------|--------|---------------|-----------|------------|---------|------------|---------------|------------|
| 1.00    | 19.00 | 65.00  | 173.00 | 21.72 | 2.00  | 0.00      | 1.00      | 1.00           | 1.00    | 1.00         | 1.00   | 2.00   | 1.50         | 112.86     | 3.00   | 24.00         | 0.00      | 4.00       | 1.00    | 17.00      | 68.00         | 0.00       |
| 2.00    | 23.00 | 59.00  | 173.00 | 19.71 | 2.00  | 1.00      | 2.00      | 1.00           | 0.00    | 0.00         | 1.00   | 3.00   | 1.50         | 185.71     | 3.00   | 35.00         | 1.00      | 5.00       | 1.00    | 17.00      | 68.00         | 0.00       |
| 3.00    | 19.00 | 78.00  | 174.00 | 25.76 | 3.00  | 0.00      | 2.00      | 1.00           | 1.00    | 0.00         | 1.00   | 3.00   | 3.00         | 74.29      | 3.00   | 31.00         | 1.00      | 5.00       | 1.00    | 18.00      | 72.00         | 0.00       |
| 4.00    | 21.00 | 84.00  | 184.00 | 24.81 | 2.00  | 1.00      | 1.00      | 1.00           | 1.00    | 1.00         | 1.00   | 2.00   | 7.00         | 83.57      | 3.00   | 35.00         | 1.00      | 5.00       | 1.00    | 17.00      | 68.00         | 0.00       |
| 5.00    | 21.00 | 64.00  | 170.00 | 22.15 | 2.00  | 1.00      | 2.00      | 1.00           | 0.00    | 0.00         | 0.00   | 3.00   | 7.00         | 81.43      | 3.00   | 35.00         | 1.00      | 10.00      | 0.00    | 13.00      | 52.00         | 0.00       |
| 6.00    | 19.00 | 81.00  | 185.00 | 23.67 | 2.00  | 1.00      | 2.00      | 1.00           | 0.00    | 0.00         | 1.00   | 3.00   | 6.00         | 111.43     | 3.00   | 31.00         | 1.00      | 4.00       | 1.00    | 16.00      | 64.00         | 0.00       |
| 7.00    | 21.00 | 78.00  | 178.00 | 24.62 | 2.00  | 1.00      | 2.00      | 1.00           | 0.00    | 0.00         | 1.00   | 3.00   | 8.00         | 171.43     | 3.00   | 36.00         | 1.00      | 4.00       | 1.00    | 17.00      | 68.00         | 0.00       |
| 8.00    | 23.00 | 85.00  | 193.00 | 22.82 | 2.00  | 1.00      | 2.00      | 1.00           | 1.00    | 1.00         | 1.00   | 2.00   | 7.00         | 154.29     | 3.00   | 19.00         | 0.00      | 6.00       | 0.00    | 19.00      | 76.00         | 0.00       |
| 9.00    | 23.00 | 65.00  | 172.00 | 21.97 | 2.00  | 0.00      | 2.00      | 1.00           | 0.00    | 0.00         | 1.00   | 3.00   | 4.50         | 97.14      | 3.00   | 26.00         | 0.00      | 4.00       | 1.00    | 16.00      | 64.00         | 0.00       |
| 10.00   | 22.00 | 43.00  | 155.00 | 17.90 | 1.00  | 1.00      | 1.00      | 1.00           | 0.00    | 1.00         | 0.00   | 3.00   | 6.00         | 81.43      | 3.00   | 31.00         | 1.00      | 12.00      | 0.00    | 18.00      | 72.00         | 0.00       |
| 11.00   | 22.00 | 45.00  | 156.00 | 18.49 | 1.00  | 1.00      | 2.00      | 1.00           | 0.00    | 0.00         | 0.00   | 3.00   | 8.00         | 60.00      | 3.00   | 24.00         | 0.00      | 4.00       | 1.00    | 15.00      | 60.00         | 0.00       |
| 12.00   | 23.00 | 66.00  | 161.00 | 25.46 | 3.00  | 1.00      | 2.00      | 1.00           | 0.00    | 0.00         | 0.00   | 3.00   | 4.50         | 120.00     | 3.00   | 19.00         | 0.00      | 8.00       | 0.00    | 13.00      | 52.00         | 0.00       |
| 13.00   | 22.00 | 48.00  | 161.00 | 18.52 | 2.00  | 1.00      | 2.00      | 1.00           | 0.00    | 0.00         | 1.00   | 3.00   | 3.00         | 128.57     | 3.00   | 24.00         | 0.00      | 3.00       | 1.00    | 17.00      | 68.00         | 0.00       |
| 14.00   | 21.00 | 71.00  | 180.00 | 21.91 | 2.00  | 0.00      | 2.00      | 1.00           | 0.00    | 0.00         | 1.00   | 3.00   | 4.50         | 115.71     | 3.00   | 32.00         | 1.00      | 5.00       | 1.00    | 17.00      | 68.00         | 0.00       |
| 15.00   | 22.00 | 85.00  | 188.00 | 24.05 | 2.00  | 1.00      | 2.00      | 1.00           | 0.00    | 0.00         | 1.00   | 3.00   | 4.00         | 81.43      | 3.00   | 29.00         | 0.00      | 4.00       | 1.00    | 17.00      | 68.00         | 0.00       |
| 16.00   | 21.00 | 50.00  | 159.00 | 19.78 | 2.00  | 1.00      | 1.00      | 1.00           | 1.00    | 0.00         | 0.00   | 1.00   | 7.00         | 80.00      | 3.00   | 21.00         | 0.00      | 8.00       | 0.00    | 16.00      | 64.00         | 0.00       |
| 17.00   | 20.00 | 78.00  | 178.00 | 24.62 | 2.00  | 0.00      | 1.00      | 1.00           | 0.00    | 0.00         | 1.00   | 3.00   | 7.00         | 120.00     | 3.00   | 17.00         | 0.00      | 3.00       | 1.00    | 18.00      | 72.00         | 0.00       |
| 18.00   | 18.00 | 76.00  | 180.00 | 23.46 | 2.00  | 1.00      | 1.00      | 1.00           | 0.00    | 0.00         | 1.00   | 3.00   | 2.50         | 154.29     | 3.00   | 36.00         | 1.00      | 3.00       | 1.00    | 19.00      | 76.00         | 0.00       |
| 19.00   | 20.00 | 70.00  | 175.00 | 22.86 | 2.00  | 1.00      | 2.00      | 1.00           | 1.00    | 1.00         | 1.00   | 3.00   | 6.50         | 101.43     | 3.00   | 30.00         | 1.00      | 5.00       | 1.00    | 17.00      | 68.00         | 0.00       |
| 20.00   | 21.00 | 79.00  | 183.00 | 23.59 | 2.00  | 0.00      | 2.00      | 1.00           | 1.00    | 0.00         | 1.00   | 3.00   | 6.50         | 128.57     | 3.00   | 33.00         | 1.00      | 2.00       | 1.00    | 17.00      | 68.00         | 0.00       |
| 21.00   | 23.00 | 83.00  | 184.00 | 24.52 | 2.00  | 1.00      | 2.00      | 1.00           | 1.00    | 0.00         | 1.00   | 3.00   | 3.50         | 330.00     | 3.00   | 32.00         | 1.00      | 2.00       | 1.00    | 18.00      | 72.00         | 0.00       |
| 22.00   | 20.00 | 60.00  | 152.00 | 25.97 | 3.00  | 1.00      | 1.00      | 1.00           | 0.00    | 0.00         | 0.00   | 3.00   | 6.00         | 122.14     | 3.00   | 35.00         | 1.00      | 1.00       | 1.00    | 18.00      | 72.00         | 0.00       |
| 23.00   | 21.00 | 72.00  | 167.00 | 25.82 | 3.00  | 1.00      | 1.00      | 1.00           | 1.00    | 0.00         | 0.00   | 1.00   | 6.00         | 111.43     | 3.00   | 31.00         | 1.00      | 4.00       | 1.00    | 14.00      | 56.00         | 0.00       |
| 24.00   | 18.00 | 65.00  | 150.00 | 28.89 | 3.00  | 1.00      | 1.00      | 1.00           | 0.00    | 0.00         | 0.00   | 3.00   | 6.00         | 132.86     | 3.00   | 38.00         | 1.00      | 5.00       | 1.00    | 19.00      | 76.00         | 0.00       |
| 25.00   | 21.00 | 79.00  | 170.00 | 27.34 | 3.00  | 1.00      | 1.00      | 1.00           | 0.00    | 0.00         | 1.00   | 3.00   | 6.00         | 154.29     | 3.00   | 34.00         | 1.00      | 5.00       | 1.00    | 18.00      | 72.00         | 0.00       |
| 26.00   | 20.00 | 92.00  | 180.00 | 28.40 | 3.00  | 1.00      | 1.00      | 1.00           | 0.00    | 0.00         | 1.00   | 3.00   | 6.00         | 115.71     | 3.00   | 32.00         | 1.00      | 4.00       | 1.00    | 22.00      | 88.00         | 0.00       |
| 27.00   | 19.00 | 65.00  | 160.00 | 25.39 | 3.00  | 0.00      | 2.00      | 1.00           | 0.00    | 0.00         | 0.00   | 3.00   | 6.50         | 94.00      | 3.00   | 24.00         | 0.00      | 6.00       | 0.00    | 17.00      | 68.00         | 0.00       |
| 28.00   | 21.00 | 75.00  | 160.00 | 29.30 | 3.00  | 1.00      | 2.00      | 1.00           | 0.00    | 0.00         | 0.00   | 3.00   | 6.50         | 225.00     | 3.00   | 31.00         | 1.00      | 3.00       | 1.00    | 22.00      | 88.00         | 0.00       |
| 29.00   | 20.00 | 79.00  | 175.00 | 25.80 | 3.00  | 1.00      | 2.00      | 1.00           | 0.00    | 0.00         | 1.00   | 3.00   | 4.50         | 218.57     | 3.00   | 25.00         | 0.00      | 5.00       | 1.00    | 21.00      | 84.00         | 0.00       |
| 30.00   | 19.00 | 83.00  | 178.00 | 26.20 | 3.00  | 1.00      | 2.00      | 1.00           | 0.00    | 1.00         | 1.00   | 2.00   | 9.00         | 88.57      | 3.00   | 33.00         | 1.00      | 6.00       | 0.00    | 20.00      | 80.00         | 0.00       |
| 31.00   | 22.00 | 58.00  | 157.00 | 23.53 | 2.00  | 1.00      | 1.00      | 2.00           | 0.00    | 0.00         | 0.00   | 1.00   | 4.00         | 84.29      | 3.00   | 27.00         | 0.00      | 13.00      | 0.00    | 16.00      | 64.00         | 0.00       |
| 32.00   | 21.00 | 53.00  | 158.00 | 21.23 | 2.00  | 0.00      | 1.00      | 1.00           | 0.00    | 0.00         | 0.00   | 1.00   | 5.00         | 156.43     | 3.00   | 30.00         | 1.00      | 4.00       | 1.00    | 18.00      | 72.00         | 0.00       |
| 33.00   | 20.00 | 61.00  | 170.00 | 21.11 | 2.00  | 1.00      | 1.00      | 1.00           | 0.00    | 0.00         | 0.00   | 2.00   | 5.50         | 77.14      | 3.00   | 32.00         | 1.00      | 6.00       | 0.00    | 16.00      | 64.00         | 0.00       |
| 34.00   | 23.00 | 55.00  | 164.00 | 20.45 | 2.00  | 1.00      | 1.00      | 1.00           | 0.00    | 0.00         | 0.00   | 2.00   | 8.00         | 85.71      | 3.00   | 26.00         | 0.00      | 8.00       | 0.00    | 20.00      | 80.00         | 0.00       |
| 35.00   | 20.00 | 72.00  | 182.00 | 21.74 | 2.00  | 1.00      | 1.00      | 1.00           | 0.00    | 0.00         | 1.00   | 3.00   | 10.00        | 173.57     | 3.00   | 20.00         | 0.00      | 10.00      | 0.00    | 16.00      | 64.00         | 0.00       |
| 36.00   | 18.00 | 68.00  | 169.00 | 23.81 | 2.00  | 0.00      | 1.00      | 1.00           | 0.00    | 0.00         | 1.00   | 3.00   | 8.00         | 162.86     | 3.00   | 28.00         | 0.00      | 6.00       | 0.00    | 21.00      | 84.00         | 0.00       |
| 37.00   | 19.00 | 70.00  | 178.00 | 22.09 | 2.00  | 1.00      | 1.00      | 1.00           | 0.00    | 0.00         | 1.00   | 3.00   | 7.00         | 128.57     | 3.00   | 28.00         | 0.00      | 3.00       | 1.00    | 17.00      | 68.00         | 0.00       |
| 38.00   | 20.00 | 75.00  | 180.00 | 23.15 | 2.00  | 0.00      | 1.00      | 1.00           | 0.00    | 0.00         | 1.00   | 3.00   | 11.00        | 142.14     | 3.00   | 25.00         | 0.00      | 7.00       | 0.00    | 15.00      | 60.00         | 0.00       |
| 39.00   | 22.00 | 78.00  | 187.00 | 22.31 | 2.00  | 0.00      | 1.00      | 1.00           | 0.00    | 0.00         | 1.00   | 3.00   | 9.00         | 177.86     | 3.00   | 23.00         | 0.00      | 4.00       | 1.00    | 20.00      | 80.00         | 0.00       |
| 40.00   | 20.00 | 65.00  | 175.00 | 21.22 | 2.00  | 1.00      | 1.00      | 1.00           | 0.00    | 0.00         | 0.00   | 3.00   | 3.50         | 141.43     | 3.00   | 32.00         | 1.00      | 5.00       | 1.00    | 22.00      | 88.00         | 0.00       |
| 41.00   | 19.00 | 59.00  | 160.00 | 23.05 | 2.00  | 1.00      | 1.00      | 1.00           | 0.00    | 0.00         | 0.00   | 3.00   | 4.50         | 98.57      | 3.00   | 32.00         | 1.00      | 11.00      | 0.00    | 18.00      | 72.00         | 0.00       |
| 42.00   | 18.00 | 54.00  | 165.00 | 19.83 | 2.00  | 1.00      | 1.00      | 1.00           | 0.00    | 0.00         | 0.00   | 3.00   | 6.00         | 122.86     | 3.00   | 28.00         | 0.00      | 0.00       | 1.00    | 17.00      | 68.00         | 0.00       |
| 43.00   | 20.00 | 77.00  | 184.00 | 22.74 | 2.00  | 1.00      | 1.00      | 1.00           | 0.00    | 0.00         | 1.00   | 3.00   | 10.00        | 90.00      | 3.00   | 21.00         | 0.00      | 4.00       | 1.00    | 20.00      | 80.00         | 0.00       |
| 44.00   | 19.00 | 68.00  | 170.00 | 23.53 | 2.00  | 1.00      | 1.00      | 1.00           | 0.00    | 0.00         | 1.00   | 3.00   | 7.00         | 78.57      | 3.00   | 32.00         | 1.00      | 2.00       | 1.00    | 17.00      | 68.00         | 0.00       |
| 45.00   | 21.00 | 63.00  | 164.00 | 23.42 | 2.00  | 0.00      | 1.00      | 1.00           | 0.00    | 0.00         | 1.00   | 3.00   | 3.00         | 142.86     | 3.00   | 30.00         | 1.00      | 86.21      | 0.00    | 17.00      | 68.00         | 0.00       |
| 46.00   | 20.00 | 71.00  | 173.00 | 23.72 | 2.00  | 1.00      | 1.00      | 1.00           | 0.00    | 0.00         | 1.00   | 3.00   | 3.50         | 91.86      | 3.00   | 28.00         | 0.00      | 6.00       | 0.00    | 18.00      | 72.00         | 0.00       |
| 47.00   | 23.00 | 76.00  | 180.00 | 23.46 | 2.00  | 1.00      | 1.00      | 1.00           | 0.00    | 0.00         | 1.00   | 3.00   | 5.00         | 91.43      | 3.00   | 37.00         | 1.00      | 4.00       | 1.00    | 23.00      | 92.00         | 0.00       |
| 48.00   | 20.00 | 73.00  | 176.00 | 23.57 | 2.00  | 1.00      | 1.00      | 1.00           | 1.00    | 1.00         | 1.00   | 1.00   | 6.00         | 128.57     | 3.00   | 25.00         | 0.00      | 1.00       | 1.00    | 21.00      | 84.00         | 0.00       |
| 49.00   | 19.00 | 75.00  | 180.00 | 23.15 | 2.00  | 1.00      | 1.00      | 1.00           | 1.00    | 1.00         | 1.00   | 1.00   | 7.00         | 157.86     | 3.00   | 37.00         | 1.00      | 8.00       | 0.00    | 21.00      | 84.00         | 0.00       |
| 50.00   | 22.00 | 68.00  | 168.00 | 24.09 | 2.00  | 1.00      | 1.00      | 1.00           | 0.00    | 1.00         | 1.00   | 2.00   | 9.00         | 94.29      | 3.00   | 26.00         | 0.00      | 7.00       | 0.00    | 13.00      | 52.00         | 0.00       |
| 51.00   | 23.00 | 73.00  | 182.00 | 22.04 | 2.00  | 1.00      | 1.00      | 1.00           | 0.00    | 1.00         | 1.00   | 2.00   | 8.00         | 77.14      | 3.00   | 29.00         | 0.00      | 4.00       | 1.00    | 20.00      | 80.00         | 0.00       |
| 52.00   | 23.00 | 81.00  | 180.00 | 25.00 | 2.00  | 0.00      | 1.00      | 1.00           | 0.00    | 1.00         | 1.00   | 3.00   | 5.00         | 61.43      | 3.00   | 35.00         | 1.00      | 7.00       | 0.00    | 17.00      | 68.00         | 0.00       |
| 53.00   | 20.00 | 50.00  | 162.00 | 19.05 | 2.00  | 0.00      | 2.00      | 1.00           | 0.00    | 0.00         | 0.00   | 2.00   | 8.00         | 185.71     | 3.00   | 25.00         | 0.00      | 8.00       | 0.00    | 17.00      | 68.00         | 0.00       |
| 54.00   | 20.00 | 58.00  | 173.00 | 19.38 | 2.00  | 0.00      | 2.00      | 1.00           | 1.00    | 0.00         | 1.00   | 2.00   | 7.00         | 147.14     | 3.00   | 36.00         | 1.00      | 3.00       | 1.00    | 17.00      | 68.00         | 0.00       |
| 55.00   | 23.00 | 64.00  | 167.00 | 22.95 | 2.00  | 1.00      | 2.00      | 1.00           | 0.00    | 0.00         | 0.00   |        |              |            |        |               |           |            |         |            |               |            |

| Subject | Age   | Weight | Height | BMI   | BMI_C | Residence | Education | Marital_Status | Smoking | Chronic_Dise | Gender | Health | Sitting_Time | PA_Min_Day | IPAQ_C | Dietary_Score | Dietary_C | PSQI_Total | Sleep_C | WHO5_Total | WHO5_Total100 | WHO5_Class |
|---------|-------|--------|--------|-------|-------|-----------|-----------|----------------|---------|--------------|--------|--------|--------------|------------|--------|---------------|-----------|------------|---------|------------|---------------|------------|
| 67.00   | 20.00 | 49.00  | 170.00 | 16.96 | 1.00  | 1.00      | 1.00      | 2.00           | 0.00    | 0.00         | 0.00   | 3.00   | 8.00         | 240.00     | 3.00   | 31.00         | 1.00      | 4.00       | 1.00    | 17.00      | 68.00         | 0.00       |
| 68.00   | 20.00 | 60.00  | 185.00 | 17.53 | 1.00  | 0.00      | 2.00      | 1.00           | 1.00    | 1.00         | 1.00   | 3.00   | 10.00        | 298.57     | 3.00   | 23.00         | 0.00      | 3.00       | 1.00    | 17.00      | 68.00         | 0.00       |
| 69.00   | 22.00 | 56.00  | 176.00 | 18.08 | 1.00  | 1.00      | 2.00      | 1.00           | 1.00    | 0.00         | 1.00   | 3.00   | 6.50         | 112.86     | 3.00   | 18.00         | 0.00      | 3.00       | 1.00    | 21.00      | 84.00         | 0.00       |
| 70.00   | 23.00 | 57.00  | 180.00 | 17.59 | 1.00  | 1.00      | 2.00      | 1.00           | 1.00    | 0.00         | 1.00   | 3.00   | 4.50         | 128.57     | 3.00   | 23.00         | 0.00      | 3.00       | 1.00    | 17.00      | 68.00         | 0.00       |
| 71.00   | 19.00 | 71.00  | 167.00 | 25.46 | 3.00  | 0.00      | 2.00      | 1.00           | 1.00    | 0.00         | 0.00   | 1.00   | 8.00         | 160.71     | 3.00   | 23.00         | 0.00      | 5.00       | 1.00    | 17.00      | 68.00         | 0.00       |
| 72.00   | 22.00 | 54.00  | 160.00 | 21.09 | 2.00  | 1.00      | 1.00      | 1.00           | 0.00    | 0.00         | 0.00   | 2.00   | 5.50         | 210.00     | 3.00   | 37.00         | 1.00      | 0.00       | 1.00    | 19.00      | 76.00         | 0.00       |
| 73.00   | 18.00 | 60.00  | 165.00 | 22.04 | 2.00  | 1.00      | 2.00      | 1.00           | 1.00    | 1.00         | 1.00   | 3.00   | 5.00         | 291.43     | 3.00   | 25.00         | 0.00      | 5.00       | 1.00    | 17.00      | 68.00         | 0.00       |
| 74.00   | 21.00 | 55.00  | 165.00 | 20.20 | 2.00  | 0.00      | 2.00      | 1.00           | 0.00    | 0.00         | 0.00   | 3.00   | 6.50         | 102.86     | 3.00   | 30.00         | 1.00      | 12.00      | 0.00    | 13.00      | 52.00         | 0.00       |
| 75.00   | 21.00 | 60.00  | 162.00 | 22.86 | 2.00  | 1.00      | 2.00      | 1.00           | 0.00    | 0.00         | 0.00   | 3.00   | 6.00         | 140.71     | 3.00   | 37.00         | 1.00      | 2.00       | 1.00    | 17.00      | 68.00         | 0.00       |
| 76.00   | 20.00 | 64.00  | 165.00 | 23.51 | 2.00  | 1.00      | 2.00      | 1.00           | 0.00    | 0.00         | 0.00   | 3.00   | 4.00         | 122.86     | 3.00   | 42.00         | 1.00      | 10.00      | 0.00    | 17.00      | 68.00         | 0.00       |
| 77.00   | 28.00 | 73.00  | 183.00 | 21.80 | 2.00  | 1.00      | 2.00      | 1.00           | 1.00    | 1.00         | 1.00   | 2.00   | 5.00         | 170.71     | 3.00   | 25.00         | 0.00      | 8.00       | 0.00    | 17.00      | 68.00         | 0.00       |
| 78.00   | 26.00 | 75.00  | 182.00 | 22.64 | 2.00  | 1.00      | 2.00      | 1.00           | 0.00    | 0.00         | 1.00   | 3.00   | 7.00         | 145.71     | 3.00   | 15.00         | 0.00      | 9.00       | 0.00    | 21.00      | 84.00         | 0.00       |
| 79.00   | 29.00 | 84.00  | 183.00 | 25.08 | 3.00  | 1.00      | 1.00      | 2.00           | 0.00    | 0.00         | 1.00   | 3.00   | 4.00         | 162.86     | 3.00   | 29.00         | 0.00      | 1.00       | 1.00    | 18.00      | 72.00         | 0.00       |
| 80.00   | 33.00 | 75.00  | 172.00 | 25.35 | 3.00  | 1.00      | 2.00      | 1.00           | 0.00    | 0.00         | 0.00   | 3.00   | 8.00         | 102.86     | 3.00   | 38.00         | 1.00      | 7.00       | 0.00    | 15.00      | 60.00         | 0.00       |
| 81.00   | 31.00 | 86.00  | 175.00 | 28.08 | 3.00  | 1.00      | 2.00      | 2.00           | 1.00    | 0.00         | 1.00   | 2.00   | 4.00         | 110.00     | 3.00   | 31.00         | 1.00      | 5.00       | 1.00    | 16.00      | 64.00         | 0.00       |
| 82.00   | 24.00 | 100.00 | 184.00 | 29.54 | 3.00  | 1.00      | 2.00      | 1.00           | 0.00    | 0.00         | 1.00   | 3.00   | 7.00         | 98.57      | 3.00   | 21.00         | 0.00      | 11.00      | 0.00    | 14.00      | 56.00         | 0.00       |
| 83.00   | 28.00 | 84.00  | 180.00 | 25.93 | 3.00  | 1.00      | 2.00      | 1.00           | 1.00    | 0.00         | 1.00   | 3.00   | 4.00         | 111.43     | 3.00   | 25.00         | 0.00      | 6.00       | 0.00    | 16.00      | 64.00         | 0.00       |
| 84.00   | 33.00 | 80.00  | 179.00 | 24.97 | 2.00  | 1.00      | 2.00      | 2.00           | 1.00    | 0.00         | 1.00   | 2.00   | 8.00         | 160.00     | 3.00   | 24.00         | 0.00      | 7.00       | 0.00    | 15.00      | 60.00         | 0.00       |
| 85.00   | 24.00 | 68.00  | 180.00 | 20.99 | 2.00  | 1.00      | 2.00      | 1.00           | 0.00    | 0.00         | 0.00   | 2.00   | 4.00         | 295.71     | 3.00   | 33.00         | 1.00      | 4.00       | 1.00    | 23.00      | 92.00         | 0.00       |
| 86.00   | 25.00 | 57.00  | 165.00 | 20.94 | 2.00  | 1.00      | 2.00      | 1.00           | 0.00    | 0.00         | 0.00   | 3.00   | 4.50         | 190.00     | 3.00   | 32.00         | 1.00      | 3.00       | 1.00    | 17.00      | 68.00         | 0.00       |
| 87.00   | 29.00 | 50.00  | 157.00 | 20.28 | 2.00  | 1.00      | 3.00      | 1.00           | 0.00    | 0.00         | 0.00   | 3.00   | 5.00         | 140.00     | 3.00   | 34.00         | 1.00      | 9.00       | 0.00    | 19.00      | 76.00         | 0.00       |
| 88.00   | 30.00 | 70.00  | 168.00 | 24.80 | 2.00  | 1.00      | 3.00      | 2.00           | 0.00    | 0.00         | 1.00   | 3.00   | 9.00         | 77.14      | 3.00   | 34.00         | 1.00      | 2.00       | 1.00    | 21.00      | 84.00         | 0.00       |
| 89.00   | 26.00 | 75.00  | 176.00 | 24.21 | 2.00  | 1.00      | 2.00      | 1.00           | 1.00    | 0.00         | 1.00   | 3.00   | 3.50         | 139.29     | 3.00   | 33.00         | 1.00      | 3.00       | 1.00    | 20.00      | 80.00         | 0.00       |
| 90.00   | 25.00 | 70.00  | 172.00 | 23.66 | 2.00  | 1.00      | 2.00      | 1.00           | 0.00    | 0.00         | 1.00   | 3.00   | 3.50         | 175.71     | 3.00   | 31.00         | 1.00      | 3.00       | 1.00    | 18.00      | 72.00         | 0.00       |
| 91.00   | 30.00 | 97.00  | 175.00 | 31.67 | 4.00  | 1.00      | 2.00      | 2.00           | 0.00    | 0.00         | 1.00   | 2.00   | 5.00         | 77.14      | 3.00   | 24.00         | 0.00      | 5.00       | 1.00    | 17.00      | 68.00         | 0.00       |
| 92.00   | 30.00 | 72.00  | 166.00 | 26.13 | 3.00  | 1.00      | 2.00      | 1.00           | 1.00    | 0.00         | 1.00   | 2.00   | 4.00         | 570.00     | 3.00   | 26.00         | 0.00      | 5.00       | 1.00    | 17.00      | 68.00         | 0.00       |
| 93.00   | 25.00 | 90.00  | 177.00 | 28.73 | 3.00  | 0.00      | 3.00      | 2.00           | 1.00    | 0.00         | 1.00   | 3.00   | 2.50         | 85.71      | 3.00   | 31.00         | 1.00      | 0.00       | 1.00    | 21.00      | 84.00         | 0.00       |
| 94.00   | 27.00 | 52.00  | 163.00 | 19.57 | 2.00  | 1.00      | 3.00      | 1.00           | 1.00    | 1.00         | 0.00   | 3.00   | 4.00         | 180.00     | 3.00   | 38.00         | 1.00      | 5.00       | 1.00    | 18.00      | 72.00         | 0.00       |
| 95.00   | 31.00 | 102.00 | 179.00 | 31.83 | 4.00  | 1.00      | 1.00      | 2.00           | 0.00    | 0.00         | 1.00   | 3.00   | 2.00         | 180.00     | 3.00   | 32.00         | 1.00      | 3.00       | 1.00    | 24.00      | 96.00         | 0.00       |
| 96.00   | 28.00 | 80.00  | 175.00 | 26.12 | 3.00  | 1.00      | 1.00      | 1.00           | 0.00    | 0.00         | 1.00   | 3.00   | 6.00         | 63.57      | 3.00   | 22.00         | 0.00      | 3.00       | 1.00    | 17.00      | 68.00         | 0.00       |
| 97.00   | 33.00 | 95.00  | 186.00 | 27.46 | 3.00  | 0.00      | 3.00      | 1.00           | 0.00    | 0.00         | 1.00   | 2.00   | 6.50         | 137.14     | 3.00   | 29.00         | 0.00      | 3.00       | 1.00    | 16.00      | 64.00         | 0.00       |
| 98.00   | 24.00 | 74.00  | 178.00 | 23.36 | 2.00  | 0.00      | 1.00      | 1.00           | 0.00    | 0.00         | 1.00   | 3.00   | 6.50         | 102.86     | 3.00   | 27.00         | 0.00      | 3.00       | 1.00    | 22.00      | 88.00         | 0.00       |
| 99.00   | 29.00 | 81.00  | 181.00 | 24.72 | 2.00  | 1.00      | 1.00      | 2.00           | 0.00    | 0.00         | 1.00   | 3.00   | 8.00         | 145.71     | 3.00   | 22.00         | 0.00      | 7.00       | 0.00    | 21.00      | 84.00         | 0.00       |
| 100.00  | 24.00 | 63.00  | 169.00 | 22.06 | 2.00  | 1.00      | 2.00      | 1.00           | 1.00    | 0.00         | 1.00   | 3.00   | 4.00         | 97.14      | 3.00   | 33.00         | 1.00      | 9.00       | 0.00    | 17.00      | 68.00         | 0.00       |
| 101.00  | 30.00 | 90.00  | 163.00 | 33.87 | 4.00  | 1.00      | 2.00      | 2.00           | 0.00    | 1.00         | 0.00   | 3.00   | 8.00         | 190.00     | 3.00   | 29.00         | 0.00      | 9.00       | 0.00    | 17.00      | 68.00         | 0.00       |
| 102.00  | 26.00 | 68.00  | 170.00 | 23.53 | 2.00  | 0.00      | 1.00      | 2.00           | 0.00    | 0.00         | 0.00   | 3.00   | 8.00         | 162.86     | 3.00   | 37.00         | 1.00      | 13.00      | 0.00    | 16.00      | 64.00         | 0.00       |
| 103.00  | 26.00 | 50.00  | 160.00 | 19.53 | 2.00  | 1.00      | 1.00      | 2.00           | 1.00    | 1.00         | 0.00   | 1.00   | 6.50         | 188.57     | 3.00   | 26.00         | 0.00      | 8.00       | 0.00    | 17.00      | 68.00         | 0.00       |
| 104.00  | 31.00 | 73.00  | 175.00 | 23.84 | 2.00  | 1.00      | 2.00      | 2.00           | 0.00    | 0.00         | 1.00   | 3.00   | 7.00         | 150.00     | 3.00   | 33.00         | 1.00      | 3.00       | 1.00    | 16.00      | 64.00         | 0.00       |
| 105.00  | 30.00 | 112.00 | 179.00 | 34.96 | 4.00  | 1.00      | 3.00      | 2.00           | 0.00    | 1.00         | 1.00   | 3.00   | 3.00         | 87.14      | 3.00   | 36.00         | 1.00      | 7.00       | 0.00    | 15.00      | 60.00         | 0.00       |
| 106.00  | 33.00 | 105.00 | 187.00 | 30.03 | 4.00  | 1.00      | 3.00      | 2.00           | 1.00    | 0.00         | 1.00   | 3.00   | 10.00        | 117.14     | 3.00   | 42.00         | 1.00      | 0.00       | 1.00    | 23.00      | 92.00         | 0.00       |
| 107.00  | 28.00 | 88.40  | 183.00 | 26.40 | 3.00  | 0.00      | 2.00      | 1.00           | 0.00    | 0.00         | 1.00   | 3.00   | 3.00         | 130.71     | 3.00   | 31.00         | 1.00      | 7.00       | 0.00    | 15.00      | 60.00         | 0.00       |
| 108.00  | 28.00 | 57.00  | 170.00 | 19.72 | 2.00  | 1.00      | 3.00      | 1.00           | 0.00    | 0.00         | 0.00   | 3.00   | 3.50         | 167.14     | 3.00   | 35.00         | 1.00      | 0.00       | 1.00    | 24.00      | 96.00         | 0.00       |
| 109.00  | 31.00 | 55.00  | 161.00 | 21.22 | 2.00  | 0.00      | 3.00      | 1.00           | 0.00    | 0.00         | 0.00   | 3.00   | 2.00         | 75.71      | 3.00   | 35.00         | 1.00      | 2.00       | 1.00    | 17.00      | 68.00         | 0.00       |
| 110.00  | 25.00 | 101.00 | 176.00 | 32.61 | 4.00  | 1.00      | 3.00      | 1.00           | 0.00    | 0.00         | 1.00   | 3.00   | 4.50         | 90.00      | 3.00   | 35.00         | 1.00      | 2.00       | 1.00    | 19.00      | 76.00         | 0.00       |
| 111.00  | 29.00 | 72.00  | 168.00 | 25.51 | 3.00  | 1.00      | 3.00      | 1.00           | 0.00    | 1.00         | 1.00   | 3.00   | 5.00         | 205.71     | 3.00   | 30.00         | 1.00      | 9.00       | 0.00    | 22.00      | 88.00         | 0.00       |
| 112.00  | 27.00 | 50.00  | 160.00 | 19.53 | 2.00  | 0.00      | 1.00      | 1.00           | 0.00    | 0.00         | 0.00   | 1.00   | 8.00         | 124.29     | 3.00   | 34.00         | 1.00      | 2.00       | 1.00    | 17.00      | 68.00         | 0.00       |
| 113.00  | 24.00 | 60.00  | 167.00 | 21.51 | 2.00  | 1.00      | 1.00      | 1.00           | 0.00    | 0.00         | 1.00   | 3.00   | 3.00         | 334.29     | 3.00   | 33.00         | 1.00      | 5.00       | 1.00    | 18.00      | 72.00         | 0.00       |
| 114.00  | 24.00 | 60.00  | 167.00 | 21.51 | 2.00  | 1.00      | 1.00      | 1.00           | 0.00    | 0.00         | 1.00   | 3.00   | 3.00         | 334.29     | 3.00   | 32.00         | 1.00      | 8.00       | 0.00    | 17.00      | 68.00         | 0.00       |
| 115.00  | 25.00 | 67.00  | 172.00 | 22.65 | 2.00  | 0.00      | 1.00      | 1.00           | 0.00    | 1.00         | 1.00   | 3.00   | 7.00         | 140.00     | 3.00   | 35.00         | 1.00      | 8.00       | 0.00    | 19.00      | 76.00         | 0.00       |
| 116.00  | 24.00 | 56.00  | 164.00 | 20.82 | 2.00  | 1.00      | 2.00      | 1.00           | 1.00    | 0.00         | 1.00   | 3.00   | 8.00         | 77.14      | 3.00   | 33.00         | 1.00      | 2.00       | 1.00    | 20.00      | 80.00         | 0.00       |
| 117.00  | 24.00 | 55.00  | 166.00 | 19.96 | 2.00  | 1.00      | 2.00      | 1.00           | 0.00    | 0.00         | 1.00   | 3.00   | 7.00         | 75.71      | 3.00   | 25.00         | 0.00      | 4.00       | 1.00    | 16.00      | 64.00         | 0.00       |
| 118.00  | 24.00 | 80.00  | 185.00 | 23.37 | 2.00  | 1.00      | 2.00      | 1.00           | 0.00    | 0.00         | 1.00   | 3.00   | 2.50         | 105.71     | 3.00   | 34.00         | 1.00      | 2.00       | 1.00    | 17.00      | 68.00         | 0.00       |
| 119.00  | 30.00 | 82.00  | 183.00 | 24.49 | 2.00  | 1.00      | 3.00      | 2.00           | 1.00    | 0.00         | 1.00   | 3.00   | 6.00         | 72.14      | 3.00   | 31.00         | 1.00      | 3.00       | 1.00    | 21.00      | 84.00         | 0.00       |
| 120.00  | 33.00 | 95.00  | 170.00 | 32.87 | 4.00  | 0.00      | 2.00      | 2.00           | 0.00    | 0.00         | 1.00   | 2.00   | 9.00         | 214.29     | 3.00   | 27.00         | 0.00      | 9.00       | 0.00    | 16.00      | 64.00         | 0.00       |
| 121.00  | 28.00 | 106.00 | 183.00 | 31.65 | 4.00  | 0.00      | 2.        |                |         |              |        |        |              |            |        |               |           |            |         |            |               |            |

| Subject | Age   | Weight | Height   | BMI   | BMI_C | Residence | Education | Marital_Status | Smoking | Chronic_Dise | Gender | Health | Sitting_Time | PA_Min_Day | IPAQ_C | Dietary_Score | Dietary_C | PSQI_Total | Sleep_C | WHO5_Total | WHO5_Total100 | WHO5_Class |
|---------|-------|--------|----------|-------|-------|-----------|-----------|----------------|---------|--------------|--------|--------|--------------|------------|--------|---------------|-----------|------------|---------|------------|---------------|------------|
| 133.00  | 35.00 | 60.00  | 167.00   | 21.51 | 2.00  | 1.00      | 1.00      | 2.00           | 0.00    | 0.00         | 1.00   | 3.00   | 3.00         | 102.86     | 3.00   | 28.00         | 0.00      | 4.00       | 1.00    | 17.00      | 68.00         | 0.00       |
| 134.00  | 44.00 | 90.00  | 173.00   | 30.07 | 4.00  | 1.00      | 3.00      | 2.00           | 0.00    | 0.00         | 1.00   | 2.00   | 4.50         | 85.71      | 3.00   | 20.00         | 0.00      | 3.00       | 1.00    | 19.00      | 76.00         | 0.00       |
| 135.00  | 36.00 | 87.00  | 178.00   | 27.46 | 3.00  | 1.00      | 2.00      | 2.00           | 0.00    | 0.00         | 1.00   | 3.00   | 3.50         | 214.29     | 3.00   | 26.00         | 0.00      | 7.00       | 0.00    | 18.00      | 72.00         | 0.00       |
| 136.00  | 36.00 | 88.00  | 183.00   | 26.28 | 3.00  | 1.00      | 2.00      | 2.00           | 1.00    | 1.00         | 1.00   | 3.00   | 7.00         | 128.57     | 3.00   | 33.00         | 1.00      | 5.00       | 1.00    | 21.00      | 84.00         | 0.00       |
| 137.00  | 39.00 | 60.00  | 164.00   | 22.31 | 2.00  | 1.00      | 3.00      | 2.00           | 1.00    | 0.00         | 0.00   | 3.00   | 7.00         | 150.00     | 3.00   | 32.00         | 1.00      | 10.00      | 0.00    | 22.00      | 88.00         | 0.00       |
| 138.00  | 35.00 | 95.00  | 177.00   | 30.32 | 4.00  | 1.00      | 1.00      | 2.00           | 0.00    | 0.00         | 1.00   | 3.00   | 5.00         | 75.00      | 3.00   | 39.00         | 1.00      | 7.00       | 0.00    | 17.00      | 68.00         | 0.00       |
| 139.00  | 35.00 | 89.00  | 177.00   | 28.41 | 3.00  | 1.00      | 1.00      | 2.00           | 0.00    | 0.00         | 1.00   | 3.00   | 5.00         | 150.00     | 3.00   | 39.00         | 1.00      | 2.00       | 1.00    | 21.00      | 84.00         | 0.00       |
| 140.00  | 36.00 | 88.00  | 178.00   | 27.77 | 3.00  | 1.00      | 2.00      | 2.00           | 1.00    | 0.00         | 1.00   | 3.00   | 4.00         | 150.00     | 3.00   | 35.00         | 1.00      | 4.00       | 1.00    | 17.00      | 68.00         | 0.00       |
| 141.00  | 42.00 | 56.00  | 165.00   | 20.57 | 2.00  | 1.00      | 2.00      | 2.00           | 0.00    | 0.00         | 0.00   | 2.00   | 7.00         | 92.14      | 3.00   | 30.00         | 1.00      | 4.00       | 1.00    | 16.00      | 64.00         | 0.00       |
| 142.00  | 43.00 | 106.00 | 172.00   | 35.83 | 4.00  | 1.00      | 2.00      | 2.00           | 1.00    | 1.00         | 1.00   | 1.00   | 3.00         | 145.71     | 3.00   | 27.00         | 0.00      | 13.00      | 0.00    | 20.00      | 80.00         | 0.00       |
| 143.00  | 36.00 | 95.00  | 189.00   | 26.60 | 3.00  | 1.00      | 2.00      | 2.00           | 1.00    | 1.00         | 1.00   | 2.00   | 9.00         | 128.57     | 3.00   | 34.00         | 1.00      | 2.00       | 1.00    | 16.00      | 64.00         | 0.00       |
| 144.00  | 43.00 | 90.00  | 170.00   | 31.14 | 4.00  | 1.00      | 1.00      | 2.00           | 1.00    | 1.00         | 1.00   | 2.00   | 5.00         | 154.29     | 3.00   | 36.00         | 1.00      | 6.00       | 0.00    | 18.00      | 72.00         | 0.00       |
| 145.00  | 40.00 | 73.00  | 176.00   | 23.57 | 2.00  | 1.00      | 2.00      | 2.00           | 0.00    | 0.00         | 0.00   | 3.00   | 5.50         | 188.57     | 3.00   | 31.00         | 1.00      | 8.00       | 0.00    | 17.00      | 68.00         | 0.00       |
| 146.00  | 39.00 | 80.00  | 156.00   | 32.87 | 4.00  | 1.00      | 2.00      | 3.00           | 0.00    | 1.00         | 0.00   | 1.00   | 5.00         | 180.00     | 3.00   | 25.00         | 0.00      | 7.00       | 0.00    | 15.00      | 60.00         | 0.00       |
| 147.00  | 39.00 | 60.00  | 170.00   | 20.76 | 2.00  | 1.00      | 2.00      | 2.00           | 1.00    | 0.00         | 0.00   | 3.00   | 3.00         | 141.43     | 3.00   | 35.00         | 1.00      | 2.00       | 1.00    | 17.00      | 68.00         | 0.00       |
| 148.00  | 34.00 | 58.00  | 165.00   | 21.30 | 2.00  | 1.00      | 3.00      | 1.00           | 0.00    | 0.00         | 0.00   | 3.00   | 2.50         | 255.71     | 3.00   | 39.00         | 1.00      | 2.00       | 1.00    | 23.00      | 92.00         | 0.00       |
| 149.00  | 38.00 | 100.00 | 170.00   | 34.60 | 4.00  | 1.00      | 1.00      | 2.00           | 0.00    | 0.00         | 0.00   | 3.00   | 5.00         | 120.00     | 3.00   | 24.00         | 0.00      | 4.00       | 1.00    | 17.00      | 68.00         | 0.00       |
| 150.00  | 41.00 | 76.00  | 170.00   | 26.30 | 3.00  | 1.00      | 2.00      | 2.00           | 0.00    | 0.00         | 1.00   | 3.00   | 7.00         | 85.71      | 3.00   | 32.00         | 1.00      | 1.00       | 1.00    | 18.00      | 72.00         | 0.00       |
| 151.00  | 44.00 | 95.00  | 182.00   | 28.68 | 3.00  | 1.00      | 2.00      | 2.00           | 0.00    | 0.00         | 1.00   | 3.00   | 6.00         | 290.00     | 3.00   | 35.00         | 1.00      | 4.00       | 1.00    | 18.00      | 72.00         | 0.00       |
| 152.00  | 37.00 | 75.00  | 180.00   | 23.15 | 2.00  | 0.00      | 1.00      | 2.00           | 0.00    | 0.00         | 1.00   | 3.00   | 1.50         | 125.00     | 3.00   | 31.00         | 1.00      | 3.00       | 1.00    | 19.00      | 76.00         | 0.00       |
| 153.00  | 40.00 | 92.00  | 180.00   | 28.40 | 3.00  | 1.00      | 3.00      | 2.00           | 0.00    | 0.00         | 1.00   | 3.00   | 7.00         | 103.57     | 3.00   | 35.00         | 1.00      | 2.00       | 1.00    | 17.00      | 68.00         | 0.00       |
| 154.00  | 35.00 | 73.00  | 165.00   | 26.81 | 3.00  | 1.00      | 3.00      | 3.00           | 0.00    | 1.00         | 0.00   | 1.00   | 5.00         | 152.14     | 3.00   | 38.00         | 1.00      | 7.00       | 0.00    | 17.00      | 68.00         | 0.00       |
| 155.00  | 42.00 | 90.00  | 186.00   | 26.01 | 3.00  | 1.00      | 3.00      | 2.00           | 1.00    | 1.00         | 1.00   | 2.00   | 4.50         | 250.00     | 3.00   | 38.00         | 1.00      | 10.00      | 0.00    | 13.00      | 52.00         | 0.00       |
| 156.00  | 40.00 | 90.00  | 180.00   | 27.78 | 3.00  | 1.00      | 3.00      | 2.00           | 0.00    | 1.00         | 1.00   | 2.00   | 3.00         | 244.43     | 3.00   | 23.00         | 0.00      | 8.00       | 0.00    | 17.00      | 68.00         | 0.00       |
| 157.00  | 40.00 | 70.00  | 175.00   | 22.86 | 2.00  | 1.00      | 3.00      | 1.00           | 0.00    | 0.00         | 1.00   | 3.00   | 7.00         | 201.43     | 3.00   | 38.00         | 1.00      | 1.00       | 1.00    | 23.00      | 92.00         | 0.00       |
| 158.00  | 37.00 | 88.00  | 178.00   | 27.77 | 3.00  | 1.00      | 3.00      | 1.00           | 0.00    | 0.00         | 1.00   | 3.00   | 3.00         | 132.14     | 3.00   | 29.00         | 0.00      | 2.00       | 1.00    | 20.00      | 80.00         | 0.00       |
| 159.00  | 42.00 | 90.00  | 170.00   | 31.14 | 4.00  | 1.00      | 2.00      | 2.00           | 0.00    | 0.00         | 1.00   | 3.00   | 7.00         | 180.00     | 3.00   | 27.00         | 0.00      | 3.00       | 1.00    | 14.00      | 56.00         | 0.00       |
| 160.00  | 43.00 | 68.00  | 159.00   | 26.90 | 3.00  | 1.00      | 2.00      | 3.00           | 0.00    | 0.00         | 1.00   | 3.00   | 6.00         | 368.00     | 3.00   | 30.00         | 1.00      | 6.00       | 0.00    | 16.00      | 64.00         | 0.00       |
| 161.00  | 34.00 | 71.00  | 168.00   | 25.16 | 3.00  | 0.00      | 2.00      | 2.00           | 0.00    | 0.00         | 1.00   | 3.00   | 4.00         | 118.57     | 3.00   | 38.00         | 1.00      | 1.00       | 1.00    | 21.00      | 84.00         | 0.00       |
| 162.00  | 37.00 | 78.00  | 179.00   | 24.34 | 2.00  | 1.00      | 2.00      | 2.00           | 0.00    | 0.00         | 1.00   | 3.00   | 3.50         | 101.43     | 3.00   | 35.00         | 1.00      | 6.00       | 0.00    | 20.00      | 80.00         | 0.00       |
| 163.00  | 40.00 | 78.00  | 178.00   | 24.62 | 2.00  | 0.00      | 2.00      | 2.00           | 0.00    | 0.00         | 1.00   | 3.00   | 2.00         | 257.14     | 3.00   | 31.00         | 1.00      | 11.00      | 0.00    | 17.00      | 68.00         | 0.00       |
| 164.00  | 39.00 | 74.00  | 183.00   | 22.10 | 2.00  | 1.00      | 3.00      | 2.00           | 0.00    | 0.00         | 1.00   | 3.00   | 4.00         | 317.14     | 3.00   | 34.00         | 1.00      | 5.00       | 1.00    | 16.00      | 64.00         | 0.00       |
| 165.00  | 50.00 | 95.00  | 173.00   | 31.74 | 4.00  | 1.00      | 2.00      | 2.00           | 0.00    | 0.00         | 1.00   | 3.00   | 4.00         | 77.14      | 3.00   | 34.00         | 1.00      | 4.00       | 1.00    | 17.00      | 68.00         | 0.00       |
| 166.00  | 36.00 | 82.00  | 174.00   | 27.08 | 3.00  | 1.00      | 1.00      | 2.00           | 0.00    | 0.00         | 1.00   | 3.00   | 5.00         | 137.14     | 3.00   | 35.00         | 1.00      | 6.00       | 0.00    | 21.00      | 84.00         | 0.00       |
| 167.00  | 58.00 | 90.00  | 178.00   | 28.41 | 3.00  | 1.00      | 1.00      | 2.00           | 0.00    | 0.00         | 1.00   | 3.00   | 8.00         | 148.57     | 3.00   | 36.00         | 1.00      | 4.00       | 1.00    | 17.00      | 68.00         | 0.00       |
| 168.00  | 51.00 | 70.00  | 168.00   | 24.80 | 2.00  | 1.00      | 2.00      | 2.00           | 0.00    | 0.00         | 0.00   | 3.00   | 5.00         | 160.00     | 3.00   | 37.00         | 1.00      | 1.00       | 1.00    | 21.00      | 84.00         | 0.00       |
| 169.00  | 49.00 | 65.00  | 170.00   | 22.49 | 2.00  | 1.00      | 2.00      | 2.00           | 0.00    | 0.00         | 1.00   | 3.00   | 5.00         | 421.43     | 3.00   | 31.00         | 1.00      | 0.00       | 1.00    | 23.00      | 92.00         | 0.00       |
| 170.00  | 47.00 | 73.00  | 173.00   | 24.39 | 2.00  | 1.00      | 2.00      | 2.00           | 0.00    | 0.00         | 1.00   | 3.00   | 6.00         | 222.86     | 3.00   | 42.00         | 1.00      | 0.00       | 1.00    | 23.00      | 92.00         | 0.00       |
| 171.00  | 49.00 | 97.00  | 172.00   | 32.79 | 4.00  | 0.00      | 2.00      | 2.00           | 0.00    | 0.00         | 1.00   | 3.00   | 6.00         | 244.29     | 3.00   | 38.00         | 1.00      | 4.00       | 1.00    | 21.00      | 84.00         | 0.00       |
| 172.00  | 51.00 | 77.00  | 174.00   | 25.43 | 3.00  | 1.00      | 2.00      | 2.00           | 0.00    | 0.00         | 1.00   | 3.00   | 6.00         | 148.57     | 3.00   | 36.00         | 1.00      | 6.00       | 0.00    | 21.00      | 84.00         | 0.00       |
| 173.00  | 48.00 | 82.00  | 181.00   | 25.03 | 3.00  | 1.00      | 2.00      | 2.00           | 1.00    | 1.00         | 1.00   | 2.00   | 2.00         | 207.86     | 3.00   | 24.00         | 0.00      | 3.00       | 1.00    | 17.00      | 68.00         | 0.00       |
| 174.00  | 50.00 | 110.00 | 190.00   | 30.47 | 4.00  | 1.00      | 3.00      | 2.00           | 0.00    | 0.00         | 1.00   | 3.00   | 4.50         | 130.00     | 3.00   | 34.00         | 1.00      | 5.00       | 1.00    | 18.00      | 72.00         | 0.00       |
| 175.00  | 55.00 | 98.00  | 183.00   | 29.26 | 3.00  | 1.00      | 3.00      | 2.00           | 0.00    | 0.00         | 1.00   | 3.00   | 4.00         | 87.14      | 3.00   | 36.00         | 1.00      | 11.00      | 0.00    | 17.00      | 68.00         | 0.00       |
| 176.00  | 53.00 | 90.00  | 182.00   | 27.17 | 3.00  | 1.00      | 3.00      | 2.00           | 0.00    | 0.00         | 1.00   | 3.00   | 6.00         | 191.43     | 3.00   | 29.00         | 0.00      | 4.00       | 1.00    | 17.00      | 68.00         | 0.00       |
| 177.00  | 51.00 | 67.00  | 158.00   | 26.84 | 3.00  | 1.00      | 3.00      | 2.00           | 1.00    | 1.00         | 1.00   | 2.00   | 9.00         | 111.43     | 3.00   | 36.00         | 1.00      | 5.00       | 1.00    | 19.00      | 76.00         | 0.00       |
| 178.00  | 48.00 | 92.00  | 184.00   | 27.17 | 3.00  | 1.00      | 3.00      | 3.00           | 1.00    | 1.00         | 1.00   | 2.00   | 5.50         | 82.14      | 3.00   | 38.00         | 1.00      | 7.00       | 0.00    | 17.00      | 68.00         | 0.00       |
| 179.00  | 46.00 | 56.00  | 156.00   | 23.01 | 2.00  | 1.00      | 3.00      | 1.00           | 0.00    | 0.00         | 0.00   | 2.00   | 8.00         | 145.71     | 3.00   | 32.00         | 1.00      | 7.00       | 0.00    | 17.00      | 68.00         | 0.00       |
| 180.00  | 47.00 | 62.00  | 164.00   | 23.05 | 2.00  | 1.00      | 3.00      | 2.00           | 0.00    | 0.00         | 0.00   | 2.00   | 8.00         | 156.43     | 3.00   | 32.00         | 1.00      | 6.00       | 0.00    | 17.00      | 68.00         | 0.00       |
| 181.00  | 59.00 | 90.00  | 190.00   | 24.93 | 2.00  | 1.00      | 3.00      | 2.00           | 0.00    | 0.00         | 1.00   | 3.00   | 8.00         | 102.86     | 3.00   | 30.00         | 1.00      | 5.00       | 1.00    | 14.00      | 56.00         | 0.00       |
| 182.00  | 64.00 | 74.00  | 177.00   | 23.62 | 2.00  | 1.00      | 3.00      | 2.00           | 1.00    | 1.00         | 1.00   | 1.00   | 10.00        | 141.43     | 3.00   | 39.00         | 1.00      | 3.00       | 1.00    | 20.00      | 80.00         | 0.00       |
| 183.00  | 47.00 | 88.00  | 170.00   | 30.45 | 4.00  | 1.00      | 3.00      | 2.00           | 0.00    | 1.00         | 1.00   | 2.00   | 3.50         | 107.86     | 3.00   | 40.00         | 1.00      | 7.00       | 0.00    | 17.00      | 68.00         | 0.00       |
| 184.00  | 46.00 | 95.00  | 185.00   | 27.76 | 3.00  | 1.00      | 3.00      | 2.00           | 0.00    | 0.00         | 1.00   | 3.00   | 4.00         | 145.71     | 3.00   | 40.00         | 1.00      | 0.00       | 1.00    | 20.00      | 80.00         | 0.00       |
| 185.00  | 55.00 | 77.00  | 170.00   | 26.64 | 3.00  | 0.00      | 2.00      | 2.00           | 0.00    | 0.00         | 1.00   | 3.00   | 4.00         | 80.00      | 3.00   | 31.00         | 1.00      | 4.00       | 1.00    | 17.00      | 68.00         | 0.00       |
| 186.00  | 60.00 | 79.00  | 168.00   | 27.99 | 3.00  | 1.00      | 2.00      | 2.00           | 0.00    | 0.00         | 1.00   | 3.00   | 6.00         | 135.00     | 3.00   | 40.00         | 1.00      | 1.00       | 1.00    | 23.00      | 92.00         | 0.00       |
| 187.00  | 58.00 | 80.00  | 170.00</ |       |       |           |           |                |         |              |        |        |              |            |        |               |           |            |         |            |               |            |

| Subject | Age   | Weight | Height | BMI   | BMI_C | Residence | Education | Marital_Status | Smoking | Chronic_Dise | Gender | Health | Sitting_Time | PA_Min_Day | IPAQ_C | Dietary_Score | Dietary_C | PSQI_Total | Sleep_C | WHO5_Total | WHO5_Total100 | WHO5_Class |
|---------|-------|--------|--------|-------|-------|-----------|-----------|----------------|---------|--------------|--------|--------|--------------|------------|--------|---------------|-----------|------------|---------|------------|---------------|------------|
| 199.00  | 21.00 | 77.00  | 176.00 | 24.86 | 2.00  | 0.00      | 1.00      | 1.00           | 0.00    | 0.00         | 1.00   | 3.00   | 4.00         | 78.57      | 2.00   | 39.00         | 1.00      | 2.00       | 1.00    | 18.00      | 72.00         | 0.00       |
| 200.00  | 21.00 | 75.00  | 180.00 | 23.15 | 2.00  | 1.00      | 2.00      | 1.00           | 0.00    | 0.00         | 1.00   | 3.00   | 4.50         | 85.71      | 2.00   | 23.00         | 0.00      | 5.00       | 1.00    | 14.00      | 56.00         | 0.00       |
| 201.00  | 19.00 | 70.00  | 169.00 | 24.51 | 2.00  | 1.00      | 2.00      | 1.00           | 0.00    | 0.00         | 0.00   | 3.00   | 8.00         | 46.00      | 2.00   | 30.00         | 1.00      | 8.00       | 0.00    | 18.00      | 72.00         | 0.00       |
| 202.00  | 21.00 | 70.00  | 162.00 | 26.67 | 3.00  | 0.00      | 2.00      | 1.00           | 1.00    | 0.00         | 0.00   | 3.00   | 6.50         | 85.71      | 2.00   | 26.00         | 0.00      | 5.00       | 1.00    | 16.00      | 64.00         | 0.00       |
| 203.00  | 20.00 | 52.00  | 160.00 | 20.31 | 2.00  | 1.00      | 1.00      | 1.00           | 1.00    | 1.00         | 1.00   | 1.00   | 6.50         | 50.71      | 2.00   | 20.00         | 0.00      | 7.00       | 0.00    | 12.00      | 48.00         | 1.00       |
| 204.00  | 19.00 | 67.70  | 161.00 | 26.12 | 3.00  | 1.00      | 2.00      | 1.00           | 0.00    | 0.00         | 0.00   | 3.00   | 7.00         | 66.43      | 2.00   | 33.00         | 1.00      | 7.00       | 0.00    | 19.00      | 76.00         | 0.00       |
| 205.00  | 21.00 | 64.00  | 166.00 | 23.23 | 2.00  | 1.00      | 2.00      | 1.00           | 1.00    | 0.00         | 1.00   | 3.00   | 6.50         | 85.71      | 2.00   | 25.00         | 0.00      | 3.00       | 1.00    | 18.00      | 72.00         | 0.00       |
| 206.00  | 19.00 | 94.00  | 175.00 | 30.69 | 4.00  | 1.00      | 1.00      | 1.00           | 0.00    | 0.00         | 0.00   | 2.00   | 7.00         | 47.14      | 2.00   | 27.00         | 0.00      | 5.00       | 1.00    | 16.00      | 64.00         | 0.00       |
| 207.00  | 21.00 | 56.00  | 136.00 | 30.28 | 4.00  | 1.00      | 1.00      | 1.00           | 1.00    | 1.00         | 1.00   | 2.00   | 10.00        | 42.86      | 2.00   | 18.00         | 0.00      | 3.00       | 1.00    | 18.00      | 72.00         | 0.00       |
| 208.00  | 18.00 | 65.00  | 161.00 | 25.08 | 3.00  | 1.00      | 1.00      | 1.00           | 0.00    | 0.00         | 0.00   | 3.00   | 6.00         | 94.29      | 2.00   | 25.00         | 0.00      | 4.00       | 1.00    | 21.00      | 84.00         | 0.00       |
| 209.00  | 21.00 | 65.00  | 159.00 | 25.71 | 3.00  | 0.00      | 1.00      | 1.00           | 0.00    | 0.00         | 0.00   | 2.00   | 4.00         | 80.71      | 2.00   | 31.00         | 1.00      | 8.00       | 0.00    | 16.00      | 64.00         | 0.00       |
| 210.00  | 22.00 | 67.00  | 160.00 | 26.17 | 3.00  | 0.00      | 1.00      | 2.00           | 0.00    | 0.00         | 0.00   | 2.00   | 4.00         | 111.43     | 2.00   | 32.00         | 1.00      | 5.00       | 1.00    | 19.00      | 76.00         | 0.00       |
| 211.00  | 21.00 | 67.00  | 158.00 | 26.84 | 3.00  | 1.00      | 1.00      | 1.00           | 0.00    | 0.00         | 0.00   | 3.00   | 9.00         | 61.71      | 2.00   | 31.00         | 1.00      | 4.00       | 1.00    | 14.00      | 56.00         | 0.00       |
| 212.00  | 22.00 | 70.00  | 153.00 | 29.90 | 3.00  | 1.00      | 1.00      | 1.00           | 0.00    | 0.00         | 0.00   | 3.00   | 12.00        | 60.00      | 2.00   | 29.00         | 0.00      | 9.00       | 0.00    | 15.00      | 60.00         | 0.00       |
| 213.00  | 23.00 | 87.00  | 176.00 | 28.09 | 3.00  | 1.00      | 1.00      | 1.00           | 0.00    | 0.00         | 1.00   | 3.00   | 11.00        | 60.00      | 2.00   | 30.00         | 1.00      | 1.00       | 1.00    | 20.00      | 80.00         | 0.00       |
| 214.00  | 21.00 | 85.00  | 176.00 | 27.44 | 3.00  | 1.00      | 2.00      | 1.00           | 0.00    | 0.00         | 1.00   | 2.00   | 2.00         | 71.43      | 2.00   | 34.00         | 1.00      | 7.00       | 0.00    | 16.00      | 64.00         | 0.00       |
| 215.00  | 21.00 | 65.00  | 159.00 | 25.71 | 3.00  | 1.00      | 2.00      | 2.00           | 1.00    | 0.00         | 0.00   | 3.00   | 7.00         | 103.57     | 2.00   | 34.00         | 1.00      | 0.00       | 1.00    | 23.00      | 92.00         | 0.00       |
| 216.00  | 21.00 | 80.00  | 176.00 | 25.83 | 3.00  | 0.00      | 2.00      | 1.00           | 0.00    | 0.00         | 0.00   | 2.00   | 8.00         | 85.71      | 2.00   | 24.00         | 0.00      | 2.00       | 1.00    | 16.00      | 64.00         | 0.00       |
| 217.00  | 22.00 | 64.00  | 158.00 | 25.64 | 3.00  | 1.00      | 2.00      | 1.00           | 0.00    | 0.00         | 0.00   | 3.00   | 7.00         | 60.71      | 2.00   | 19.00         | 0.00      | 7.00       | 0.00    | 16.00      | 64.00         | 0.00       |
| 218.00  | 21.00 | 67.00  | 162.00 | 25.53 | 3.00  | 1.00      | 2.00      | 1.00           | 0.00    | 0.00         | 0.00   | 3.00   | 4.00         | 72.86      | 2.00   | 30.00         | 1.00      | 2.00       | 1.00    | 16.00      | 64.00         | 0.00       |
| 219.00  | 22.00 | 90.00  | 189.00 | 25.20 | 3.00  | 1.00      | 2.00      | 1.00           | 1.00    | 0.00         | 1.00   | 3.00   | 6.50         | 38.57      | 2.00   | 29.00         | 0.00      | 9.00       | 0.00    | 13.00      | 52.00         | 0.00       |
| 220.00  | 21.00 | 60.00  | 153.00 | 25.63 | 3.00  | 0.00      | 2.00      | 1.00           | 0.00    | 0.00         | 0.00   | 3.00   | 8.00         | 94.29      | 2.00   | 30.00         | 1.00      | 4.00       | 1.00    | 19.00      | 76.00         | 0.00       |
| 221.00  | 21.00 | 82.00  | 177.00 | 26.17 | 3.00  | 0.00      | 2.00      | 1.00           | 0.00    | 0.00         | 0.00   | 3.00   | 8.00         | 57.14      | 2.00   | 28.00         | 0.00      | 3.00       | 1.00    | 18.00      | 72.00         | 0.00       |
| 222.00  | 20.00 | 70.00  | 174.00 | 23.12 | 2.00  | 1.00      | 1.00      | 1.00           | 0.00    | 0.00         | 0.00   | 1.00   | 5.50         | 81.43      | 2.00   | 31.00         | 1.00      | 10.00      | 0.00    | 15.00      | 60.00         | 0.00       |
| 223.00  | 20.00 | 53.00  | 158.00 | 21.23 | 2.00  | 1.00      | 1.00      | 1.00           | 1.00    | 0.00         | 0.00   | 2.00   | 6.00         | 71.43      | 2.00   | 14.00         | 0.00      | 2.00       | 1.00    | 16.00      | 64.00         | 0.00       |
| 224.00  | 22.00 | 57.00  | 161.00 | 21.99 | 2.00  | 0.00      | 1.00      | 1.00           | 0.00    | 0.00         | 0.00   | 2.00   | 10.00        | 51.43      | 2.00   | 23.00         | 0.00      | 14.00      | 0.00    | 12.00      | 48.00         | 1.00       |
| 225.00  | 21.00 | 57.00  | 165.00 | 20.94 | 2.00  | 1.00      | 1.00      | 1.00           | 0.00    | 0.00         | 0.00   | 2.00   | 5.50         | 42.86      | 2.00   | 31.00         | 1.00      | 6.00       | 0.00    | 7.00       | 28.00         | 1.00       |
| 226.00  | 23.00 | 53.00  | 160.00 | 20.70 | 2.00  | 0.00      | 1.00      | 1.00           | 0.00    | 0.00         | 0.00   | 2.00   | 7.00         | 43.57      | 2.00   | 34.00         | 1.00      | 4.00       | 1.00    | 19.00      | 76.00         | 0.00       |
| 227.00  | 20.00 | 48.00  | 159.00 | 18.99 | 2.00  | 1.00      | 1.00      | 1.00           | 0.00    | 0.00         | 0.00   | 2.00   | 7.00         | 43.57      | 2.00   | 32.00         | 1.00      | 1.00       | 1.00    | 17.00      | 68.00         | 0.00       |
| 228.00  | 20.00 | 60.00  | 160.00 | 23.44 | 2.00  | 0.00      | 1.00      | 1.00           | 0.00    | 0.00         | 0.00   | 3.00   | 7.00         | 90.00      | 2.00   | 21.00         | 0.00      | 7.00       | 0.00    | 15.00      | 60.00         | 0.00       |
| 229.00  | 18.00 | 53.40  | 159.00 | 21.12 | 2.00  | 1.00      | 1.00      | 1.00           | 0.00    | 0.00         | 0.00   | 3.00   | 10.00        | 94.29      | 2.00   | 12.00         | 0.00      | 10.00      | 0.00    | 16.00      | 64.00         | 0.00       |
| 230.00  | 20.00 | 67.00  | 166.00 | 24.31 | 2.00  | 1.00      | 1.00      | 1.00           | 0.00    | 0.00         | 0.00   | 3.00   | 5.00         | 72.86      | 2.00   | 28.00         | 0.00      | 4.00       | 1.00    | 18.00      | 72.00         | 0.00       |
| 231.00  | 22.00 | 62.00  | 162.00 | 23.62 | 2.00  | 1.00      | 1.00      | 1.00           | 0.00    | 0.00         | 0.00   | 3.00   | 3.50         | 85.71      | 2.00   | 27.00         | 0.00      | 0.00       | 1.00    | 21.00      | 84.00         | 0.00       |
| 232.00  | 21.00 | 58.00  | 167.00 | 20.80 | 2.00  | 0.00      | 1.00      | 1.00           | 0.00    | 0.00         | 0.00   | 3.00   | 7.00         | 81.43      | 2.00   | 27.00         | 0.00      | 3.00       | 1.00    | 21.00      | 84.00         | 0.00       |
| 233.00  | 21.00 | 57.00  | 159.00 | 22.55 | 2.00  | 1.00      | 1.00      | 1.00           | 0.00    | 0.00         | 0.00   | 3.00   | 4.00         | 38.57      | 2.00   | 25.00         | 0.00      | 4.00       | 1.00    | 17.00      | 68.00         | 0.00       |
| 234.00  | 21.00 | 68.00  | 183.00 | 20.31 | 2.00  | 0.00      | 1.00      | 1.00           | 0.00    | 0.00         | 1.00   | 3.00   | 5.00         | 64.29      | 2.00   | 32.00         | 1.00      | 1.00       | 1.00    | 18.00      | 72.00         | 0.00       |
| 235.00  | 20.00 | 70.00  | 175.00 | 22.86 | 2.00  | 1.00      | 1.00      | 1.00           | 1.00    | 1.00         | 1.00   | 1.00   | 5.00         | 54.29      | 2.00   | 34.00         | 1.00      | 3.00       | 1.00    | 23.00      | 92.00         | 0.00       |
| 236.00  | 22.00 | 70.00  | 180.00 | 21.60 | 2.00  | 1.00      | 1.00      | 1.00           | 1.00    | 1.00         | 1.00   | 2.00   | 8.00         | 81.43      | 2.00   | 32.00         | 1.00      | 11.00      | 0.00    | 11.00      | 44.00         | 1.00       |
| 237.00  | 20.00 | 78.00  | 183.00 | 23.29 | 2.00  | 1.00      | 1.00      | 1.00           | 1.00    | 1.00         | 1.00   | 2.00   | 5.50         | 34.29      | 2.00   | 27.00         | 0.00      | 7.00       | 0.00    | 15.00      | 60.00         | 0.00       |
| 238.00  | 19.00 | 68.00  | 174.00 | 22.46 | 2.00  | 1.00      | 1.00      | 1.00           | 1.00    | 1.00         | 0.00   | 2.00   | 5.00         | 64.29      | 2.00   | 27.00         | 0.00      | 5.00       | 1.00    | 16.00      | 64.00         | 0.00       |
| 239.00  | 20.00 | 73.00  | 187.00 | 20.88 | 2.00  | 1.00      | 1.00      | 1.00           | 1.00    | 1.00         | 1.00   | 2.00   | 5.50         | 96.00      | 2.00   | 31.00         | 1.00      | 5.00       | 1.00    | 19.00      | 76.00         | 0.00       |
| 240.00  | 21.00 | 89.00  | 191.00 | 24.40 | 2.00  | 0.00      | 1.00      | 3.00           | 1.00    | 1.00         | 1.00   | 2.00   | 5.50         | 40.00      | 2.00   | 26.00         | 0.00      | 5.00       | 1.00    | 17.00      | 68.00         | 0.00       |
| 241.00  | 23.00 | 78.00  | 196.00 | 20.30 | 2.00  | 0.00      | 1.00      | 1.00           | 1.00    | 1.00         | 1.00   | 2.00   | 5.50         | 64.29      | 2.00   | 18.00         | 0.00      | 6.00       | 0.00    | 16.00      | 64.00         | 0.00       |
| 242.00  | 19.00 | 51.00  | 154.00 | 21.50 | 2.00  | 1.00      | 1.00      | 1.00           | 1.00    | 1.00         | 0.00   | 3.00   | 6.00         | 92.86      | 2.00   | 35.00         | 1.00      | 8.00       | 0.00    | 18.00      | 72.00         | 0.00       |
| 243.00  | 19.00 | 53.00  | 160.00 | 20.70 | 2.00  | 1.00      | 2.00      | 1.00           | 0.00    | 0.00         | 0.00   | 1.00   | 6.00         | 64.29      | 2.00   | 32.00         | 1.00      | 7.00       | 0.00    | 9.00       | 36.00         | 1.00       |
| 244.00  | 20.00 | 55.00  | 170.00 | 19.03 | 2.00  | 1.00      | 2.00      | 1.00           | 0.00    | 0.00         | 1.00   | 2.00   | 3.50         | 79.29      | 2.00   | 22.00         | 0.00      | 4.00       | 1.00    | 21.00      | 84.00         | 0.00       |
| 245.00  | 20.00 | 59.00  | 170.00 | 20.42 | 2.00  | 1.00      | 2.00      | 1.00           | 0.00    | 0.00         | 1.00   | 2.00   | 6.50         | 34.29      | 2.00   | 24.00         | 0.00      | 4.00       | 1.00    | 17.00      | 68.00         | 0.00       |
| 246.00  | 19.00 | 50.00  | 156.00 | 20.55 | 2.00  | 1.00      | 2.00      | 1.00           | 0.00    | 0.00         | 0.00   | 3.00   | 7.00         | 46.43      | 2.00   | 24.00         | 0.00      | 4.00       | 1.00    | 20.00      | 80.00         | 0.00       |
| 247.00  | 21.00 | 74.00  | 180.00 | 22.84 | 2.00  | 1.00      | 2.00      | 1.00           | 1.00    | 0.00         | 1.00   | 2.00   | 4.50         | 102.86     | 2.00   | 19.00         | 0.00      | 9.00       | 0.00    | 12.00      | 48.00         | 1.00       |
| 248.00  | 21.00 | 65.00  | 164.00 | 24.17 | 2.00  | 1.00      | 2.00      | 2.00           | 0.00    | 0.00         | 0.00   | 2.00   | 5.00         | 34.29      | 2.00   | 31.00         | 1.00      | 5.00       | 1.00    | 19.00      | 76.00         | 0.00       |
| 249.00  | 20.00 | 69.00  | 174.00 | 22.79 | 2.00  | 1.00      | 2.00      | 1.00           | 1.00    | 0.00         | 1.00   | 3.00   | 8.00         | 52.86      | 2.00   | 24.00         | 0.00      | 5.00       | 1.00    | 21.00      | 84.00         | 0.00       |
| 250.00  | 20.00 | 66.00  | 168.00 | 23.38 | 2.00  | 0.00      | 2.00      | 1.00           | 1.00    | 0.00         | 1.00   | 3.00   | 4.00         | 87.86      | 2.00   | 20.00         | 0.00      | 7.00       | 0.00    | 16.00      | 64.00         | 0.00       |
| 251.00  | 22.00 | 70.00  | 175.00 | 22.86 | 2.00  | 1.00      | 2.00      | 1.00           | 1.00    | 0.00         | 1.00   | 3.00   | 5.00         | 66.43      | 2.00   | 36.00         | 1.00      | 4.00       | 1.00    | 17.00      | 68.00         | 0.00       |
| 252.00  | 19.00 | 56.00  | 168.00 | 19.84 | 2.00  | 0.00      | 2.00      | 1.00           | 0.00    | 0.00         | 1.00   | 3.00   | 6.50         | 77.14      | 2.00   | 22.00         | 0.00      | 5.00       | 1.00    | 15.00      | 60.00         | 0.00       |
| 253.00  | 22.00 | 76.00  | 186.00 | 21.97 | 2.00  | 0.00      | 2.00      | 1.00           |         |              |        |        |              |            |        |               |           |            |         |            |               |            |

| Subject | Age   | Weight | Height | BMI   | BMI_C | Residence | Education | Marital_Status | Smoking | Chronic_Dise | Gender | Health | Sitting_Time | PA_Min_Day | IPAQ_C | Dietary_Score | Dietary_C | PSQI_Total | Sleep_C | WHO5_Total | WHO5_Total100 | WHO5_Class |
|---------|-------|--------|--------|-------|-------|-----------|-----------|----------------|---------|--------------|--------|--------|--------------|------------|--------|---------------|-----------|------------|---------|------------|---------------|------------|
| 265.00  | 20.00 | 64.00  | 168.00 | 22.68 | 2.00  | 0.00      | 2.00      | 2.00           | 0.00    | 0.00         | 0.00   | 3.00   | 9.00         | 55.71      | 2.00   | 35.00         | 1.00      | 2.00       | 1.00    | 19.00      | 76.00         | 0.00       |
| 266.00  | 20.00 | 56.00  | 157.00 | 22.72 | 2.00  | 1.00      | 2.00      | 1.00           | 0.00    | 1.00         | 0.00   | 2.00   | 9.00         | 72.86      | 2.00   | 32.00         | 1.00      | 3.00       | 1.00    | 16.00      | 64.00         | 0.00       |
| 267.00  | 22.00 | 60.00  | 164.00 | 22.31 | 2.00  | 1.00      | 2.00      | 1.00           | 0.00    | 1.00         | 0.00   | 3.00   | 7.00         | 66.43      | 2.00   | 22.00         | 0.00      | 7.00       | 0.00    | 17.00      | 68.00         | 0.00       |
| 268.00  | 21.00 | 71.00  | 173.00 | 23.72 | 2.00  | 0.00      | 2.00      | 1.00           | 1.00    | 1.00         | 0.00   | 3.00   | 6.00         | 53.57      | 2.00   | 26.00         | 0.00      | 8.00       | 0.00    | 15.00      | 60.00         | 0.00       |
| 269.00  | 23.00 | 56.00  | 159.00 | 22.15 | 2.00  | 1.00      | 3.00      | 1.00           | 0.00    | 0.00         | 0.00   | 1.00   | 6.50         | 34.29      | 2.00   | 31.00         | 1.00      | 9.00       | 0.00    | 9.00       | 36.00         | 1.00       |
| 270.00  | 22.00 | 52.00  | 168.00 | 18.42 | 1.00  | 1.00      | 1.00      | 1.00           | 0.00    | 0.00         | 0.00   | 1.00   | 6.00         | 98.57      | 2.00   | 37.00         | 1.00      | 3.00       | 1.00    | 15.00      | 60.00         | 0.00       |
| 271.00  | 18.00 | 56.00  | 178.00 | 17.67 | 1.00  | 1.00      | 1.00      | 1.00           | 0.00    | 0.00         | 1.00   | 2.00   | 8.00         | 115.71     | 2.00   | 20.00         | 0.00      | 7.00       | 0.00    | 17.00      | 68.00         | 0.00       |
| 272.00  | 18.00 | 39.00  | 150.00 | 17.33 | 1.00  | 1.00      | 1.00      | 1.00           | 0.00    | 0.00         | 0.00   | 2.00   | 1.00         | 72.86      | 2.00   | 34.00         | 1.00      | 3.00       | 1.00    | 18.00      | 72.00         | 0.00       |
| 273.00  | 18.00 | 50.00  | 170.00 | 17.30 | 1.00  | 0.00      | 1.00      | 1.00           | 0.00    | 0.00         | 1.00   | 3.00   | 4.50         | 71.43      | 2.00   | 29.00         | 0.00      | 3.00       | 1.00    | 16.00      | 64.00         | 0.00       |
| 274.00  | 22.00 | 88.00  | 173.00 | 29.40 | 3.00  | 1.00      | 2.00      | 1.00           | 0.00    | 0.00         | 0.00   | 3.00   | 5.50         | 94.29      | 2.00   | 20.00         | 0.00      | 5.00       | 1.00    | 17.00      | 68.00         | 0.00       |
| 275.00  | 23.00 | 89.00  | 176.00 | 28.73 | 3.00  | 1.00      | 2.00      | 1.00           | 0.00    | 1.00         | 1.00   | 1.00   | 4.00         | 68.57      | 2.00   | 27.00         | 0.00      | 8.00       | 0.00    | 18.00      | 72.00         | 0.00       |
| 276.00  | 23.00 | 60.00  | 162.00 | 22.86 | 2.00  | 0.00      | 2.00      | 1.00           | 0.00    | 0.00         | 0.00   | 3.00   | 6.50         | 72.86      | 2.00   | 27.00         | 0.00      | 4.00       | 1.00    | 16.00      | 64.00         | 0.00       |
| 277.00  | 19.00 | 60.00  | 172.00 | 20.28 | 2.00  | 0.00      | 2.00      | 1.00           | 0.00    | 0.00         | 1.00   | 3.00   | 3.50         | 101.43     | 2.00   | 24.00         | 0.00      | 7.00       | 0.00    | 9.00       | 36.00         | 1.00       |
| 278.00  | 23.00 | 72.00  | 175.00 | 23.51 | 2.00  | 1.00      | 2.00      | 1.00           | 1.00    | 1.00         | 1.00   | 2.00   | 5.00         | 97.00      | 2.00   | 34.00         | 1.00      | 6.00       | 0.00    | 11.00      | 44.00         | 1.00       |
| 279.00  | 21.00 | 65.00  | 176.00 | 20.98 | 2.00  | 0.00      | 2.00      | 1.00           | 1.00    | 0.00         | 1.00   | 2.00   | 4.50         | 83.57      | 2.00   | 27.00         | 0.00      | 2.00       | 1.00    | 17.00      | 68.00         | 0.00       |
| 280.00  | 20.00 | 59.00  | 169.00 | 20.66 | 2.00  | 0.00      | 2.00      | 1.00           | 1.00    | 0.00         | 0.00   | 3.00   | 6.50         | 71.86      | 2.00   | 26.00         | 0.00      | 2.00       | 1.00    | 19.00      | 76.00         | 0.00       |
| 281.00  | 23.00 | 56.00  | 159.00 | 22.15 | 2.00  | 0.00      | 2.00      | 1.00           | 0.00    | 0.00         | 0.00   | 3.00   | 6.00         | 52.86      | 2.00   | 33.00         | 1.00      | 2.00       | 1.00    | 17.00      | 68.00         | 0.00       |
| 282.00  | 21.00 | 59.00  | 165.00 | 21.67 | 2.00  | 1.00      | 2.00      | 1.00           | 0.00    | 0.00         | 0.00   | 3.00   | 7.00         | 60.00      | 2.00   | 22.00         | 0.00      | 5.00       | 1.00    | 17.00      | 68.00         | 0.00       |
| 283.00  | 27.00 | 56.00  | 167.00 | 20.08 | 2.00  | 0.00      | 1.00      | 1.00           | 0.00    | 0.00         | 0.00   | 3.00   | 6.00         | 64.29      | 2.00   | 38.00         | 1.00      | 0.00       | 1.00    | 16.00      | 64.00         | 0.00       |
| 284.00  | 27.00 | 70.00  | 180.00 | 21.60 | 2.00  | 1.00      | 1.00      | 1.00           | 0.00    | 1.00         | 1.00   | 3.00   | 4.00         | 85.71      | 2.00   | 25.00         | 0.00      | 5.00       | 1.00    | 16.00      | 64.00         | 0.00       |
| 285.00  | 31.00 | 65.00  | 175.00 | 21.22 | 2.00  | 1.00      | 3.00      | 2.00           | 0.00    | 0.00         | 0.00   | 3.00   | 3.00         | 42.86      | 2.00   | 29.00         | 0.00      | 1.00       | 1.00    | 19.00      | 76.00         | 0.00       |
| 286.00  | 26.00 | 112.00 | 193.00 | 30.07 | 4.00  | 0.00      | 2.00      | 2.00           | 0.00    | 0.00         | 1.00   | 3.00   | 8.00         | 51.43      | 2.00   | 35.00         | 1.00      | 1.00       | 1.00    | 18.00      | 72.00         | 0.00       |
| 287.00  | 24.00 | 75.00  | 172.00 | 25.35 | 3.00  | 1.00      | 2.00      | 1.00           | 0.00    | 0.00         | 1.00   | 3.00   | 6.00         | 72.86      | 2.00   | 26.00         | 0.00      | 2.00       | 1.00    | 19.00      | 76.00         | 0.00       |
| 288.00  | 33.00 | 75.00  | 172.00 | 25.35 | 3.00  | 1.00      | 2.00      | 2.00           | 1.00    | 1.00         | 1.00   | 2.00   | 4.00         | 71.43      | 2.00   | 37.00         | 1.00      | 5.00       | 1.00    | 14.00      | 56.00         | 0.00       |
| 289.00  | 28.00 | 87.00  | 180.00 | 26.85 | 3.00  | 1.00      | 2.00      | 2.00           | 0.00    | 0.00         | 1.00   | 3.00   | 6.00         | 61.43      | 2.00   | 31.00         | 1.00      | 3.00       | 1.00    | 19.00      | 76.00         | 0.00       |
| 290.00  | 26.00 | 83.00  | 178.00 | 26.20 | 3.00  | 1.00      | 2.00      | 1.00           | 0.00    | 0.00         | 1.00   | 3.00   | 7.00         | 109.29     | 2.00   | 30.00         | 1.00      | 5.00       | 1.00    | 19.00      | 76.00         | 0.00       |
| 291.00  | 28.00 | 76.00  | 169.00 | 26.61 | 3.00  | 0.00      | 3.00      | 2.00           | 1.00    | 0.00         | 1.00   | 3.00   | 6.00         | 85.71      | 2.00   | 28.00         | 0.00      | 5.00       | 1.00    | 16.00      | 64.00         | 0.00       |
| 292.00  | 25.00 | 48.00  | 153.00 | 20.50 | 2.00  | 0.00      | 2.00      | 1.00           | 0.00    | 0.00         | 0.00   | 3.00   | 4.00         | 45.00      | 2.00   | 25.00         | 0.00      | 9.00       | 0.00    | 9.00       | 36.00         | 1.00       |
| 293.00  | 24.00 | 60.00  | 167.00 | 21.51 | 2.00  | 0.00      | 2.00      | 1.00           | 0.00    | 0.00         | 1.00   | 3.00   | 3.50         | 75.71      | 2.00   | 34.00         | 1.00      | 6.00       | 0.00    | 19.00      | 76.00         | 0.00       |
| 294.00  | 28.00 | 70.00  | 170.00 | 24.22 | 2.00  | 1.00      | 2.00      | 2.00           | 0.00    | 0.00         | 1.00   | 3.00   | 3.50         | 52.14      | 2.00   | 30.00         | 1.00      | 3.00       | 1.00    | 21.00      | 84.00         | 0.00       |
| 295.00  | 24.00 | 68.00  | 170.00 | 23.53 | 2.00  | 1.00      | 2.00      | 1.00           | 1.00    | 1.00         | 1.00   | 2.00   | 7.00         | 81.43      | 2.00   | 30.00         | 1.00      | 2.00       | 1.00    | 16.00      | 64.00         | 0.00       |
| 296.00  | 25.00 | 62.00  | 167.00 | 22.23 | 2.00  | 0.00      | 3.00      | 1.00           | 0.00    | 0.00         | 0.00   | 3.00   | 7.00         | 65.71      | 2.00   | 37.00         | 1.00      | 5.00       | 1.00    | 18.00      | 72.00         | 0.00       |
| 297.00  | 24.00 | 77.00  | 172.00 | 26.03 | 3.00  | 1.00      | 2.00      | 1.00           | 1.00    | 0.00         | 0.00   | 1.00   | 9.00         | 57.86      | 2.00   | 27.00         | 0.00      | 5.00       | 1.00    | 11.00      | 44.00         | 1.00       |
| 298.00  | 29.00 | 102.00 | 189.00 | 28.55 | 3.00  | 1.00      | 2.00      | 2.00           | 0.00    | 1.00         | 1.00   | 2.00   | 2.00         | 75.00      | 2.00   | 28.00         | 0.00      | 5.00       | 1.00    | 16.00      | 64.00         | 0.00       |
| 299.00  | 26.00 | 82.00  | 182.00 | 24.76 | 2.00  | 1.00      | 2.00      | 2.00           | 1.00    | 0.00         | 1.00   | 3.00   | 3.50         | 75.00      | 2.00   | 36.00         | 1.00      | 2.00       | 1.00    | 18.00      | 72.00         | 0.00       |
| 300.00  | 30.00 | 63.00  | 165.00 | 23.14 | 2.00  | 1.00      | 2.00      | 2.00           | 0.00    | 0.00         | 0.00   | 3.00   | 3.50         | 72.86      | 2.00   | 33.00         | 1.00      | 4.00       | 1.00    | 20.00      | 80.00         | 0.00       |
| 301.00  | 27.00 | 65.00  | 167.00 | 23.31 | 2.00  | 1.00      | 2.00      | 1.00           | 1.00    | 0.00         | 0.00   | 3.00   | 4.50         | 42.86      | 2.00   | 34.00         | 1.00      | 9.00       | 0.00    | 16.00      | 64.00         | 0.00       |
| 302.00  | 26.00 | 58.00  | 157.00 | 23.53 | 2.00  | 1.00      | 2.00      | 1.00           | 1.00    | 0.00         | 0.00   | 3.00   | 4.00         | 55.71      | 2.00   | 25.00         | 0.00      | 3.00       | 1.00    | 21.00      | 84.00         | 0.00       |
| 303.00  | 32.00 | 81.00  | 184.00 | 23.92 | 2.00  | 1.00      | 2.00      | 1.00           | 0.00    | 0.00         | 1.00   | 3.00   | 8.00         | 38.57      | 2.00   | 33.00         | 1.00      | 1.00       | 1.00    | 19.00      | 76.00         | 0.00       |
| 304.00  | 27.00 | 53.00  | 170.00 | 18.34 | 1.00  | 1.00      | 2.00      | 2.00           | 1.00    | 0.00         | 0.00   | 2.00   | 7.00         | 68.57      | 2.00   | 30.00         | 1.00      | 3.00       | 1.00    | 16.00      | 64.00         | 0.00       |
| 305.00  | 32.00 | 120.00 | 195.00 | 31.56 | 4.00  | 1.00      | 2.00      | 3.00           | 0.00    | 0.00         | 1.00   | 3.00   | 5.00         | 72.86      | 2.00   | 26.00         | 0.00      | 2.00       | 1.00    | 19.00      | 76.00         | 0.00       |
| 306.00  | 30.00 | 84.00  | 179.00 | 26.22 | 3.00  | 1.00      | 2.00      | 1.00           | 0.00    | 0.00         | 1.00   | 3.00   | 5.00         | 32.86      | 2.00   | 27.00         | 0.00      | 2.00       | 1.00    | 19.00      | 76.00         | 0.00       |
| 307.00  | 32.00 | 60.00  | 160.00 | 23.44 | 2.00  | 1.00      | 2.00      | 2.00           | 0.00    | 1.00         | 0.00   | 2.00   | 7.00         | 51.43      | 2.00   | 37.00         | 1.00      | 8.00       | 0.00    | 16.00      | 64.00         | 0.00       |
| 308.00  | 27.00 | 69.00  | 172.00 | 23.32 | 2.00  | 1.00      | 1.00      | 1.00           | 0.00    | 0.00         | 1.00   | 3.00   | 3.50         | 70.71      | 2.00   | 36.00         | 1.00      | 2.00       | 1.00    | 19.00      | 76.00         | 0.00       |
| 309.00  | 28.00 | 63.00  | 175.00 | 20.57 | 2.00  | 1.00      | 3.00      | 1.00           | 0.00    | 0.00         | 1.00   | 3.00   | 2.50         | 92.14      | 2.00   | 24.00         | 0.00      | 2.00       | 1.00    | 18.00      | 72.00         | 0.00       |
| 310.00  | 31.00 | 90.00  | 158.00 | 36.05 | 4.00  | 1.00      | 1.00      | 1.00           | 0.00    | 0.00         | 0.00   | 3.00   | 9.00         | 68.57      | 2.00   | 34.00         | 1.00      | 2.00       | 1.00    | 18.00      | 72.00         | 0.00       |
| 311.00  | 24.00 | 59.00  | 167.00 | 21.16 | 2.00  | 1.00      | 2.00      | 1.00           | 1.00    | 1.00         | 0.00   | 3.00   | 6.50         | 72.86      | 2.00   | 28.00         | 0.00      | 7.00       | 0.00    | 16.00      | 64.00         | 0.00       |
| 312.00  | 30.00 | 75.00  | 168.00 | 26.57 | 3.00  | 0.00      | 1.00      | 1.00           | 0.00    | 0.00         | 1.00   | 3.00   | 4.50         | 90.71      | 2.00   | 35.00         | 1.00      | 2.00       | 1.00    | 19.00      | 76.00         | 0.00       |
| 313.00  | 27.00 | 77.00  | 163.00 | 28.98 | 3.00  | 1.00      | 2.00      | 1.00           | 0.00    | 0.00         | 0.00   | 3.00   | 2.50         | 62.14      | 2.00   | 34.00         | 1.00      | 1.00       | 1.00    | 19.00      | 76.00         | 0.00       |
| 314.00  | 32.00 | 70.00  | 170.00 | 24.22 | 2.00  | 1.00      | 2.00      | 1.00           | 1.00    | 0.00         | 0.00   | 3.00   | 5.00         | 47.14      | 2.00   | 22.00         | 0.00      | 3.00       | 1.00    | 17.00      | 68.00         | 0.00       |
| 315.00  | 28.00 | 59.00  | 160.00 | 23.05 | 2.00  | 1.00      | 2.00      | 1.00           | 0.00    | 0.00         | 0.00   | 1.00   | 2.00         | 70.00      | 2.00   | 33.00         | 1.00      | 4.00       | 1.00    | 15.00      | 60.00         | 0.00       |
| 316.00  | 25.00 | 51.00  | 160.00 | 19.92 | 2.00  | 1.00      | 2.00      | 1.00           | 0.00    | 0.00         | 0.00   | 3.00   | 8.00         | 38.57      | 2.00   | 20.00         | 0.00      | 9.00       | 0.00    | 18.00      | 72.00         | 0.00       |
| 317.00  | 30.00 | 122.00 | 183.00 | 36.43 | 4.00  | 1.00      | 2.00      | 2.00           | 0.00    | 0.00         | 1.00   | 1.00   | 6.00         | 62.14      | 2.00   | 24.00         | 0.00      | 9.00       | 0.00    | 9.00       | 36.00         | 1.00       |
| 318.00  | 30.00 | 85.00  | 180.00 | 26.23 | 3.00  | 1.00      | 2.00      | 1.00           | 0.00    | 0.00         | 1.00   | 3.00   | 8.00         | 60.00      | 2.00   | 35.00         | 1.00      | 8.00       | 0.00    | 13.00      | 52.00         | 0.00       |
| 319.00  | 31.00 | 75.00  | 180.00 | 23.15 | 2.00  | 1.00      | 2.00      | 1.00           | 0.      |              |        |        |              |            |        |               |           |            |         |            |               |            |

| Subject | Age   | Weight | Height | BMI   | BMI_C | Residence | Education | Marital_Status | Smoking | Chronic_Dise | Gender | Health | Sitting_Time | PA_Min_Day | IPAQ_C | Dietary_Score | Dietary_C | PSQI_Total | Sleep_C | WHO5_Total | WHO5_Total100 | WHO5_Class |
|---------|-------|--------|--------|-------|-------|-----------|-----------|----------------|---------|--------------|--------|--------|--------------|------------|--------|---------------|-----------|------------|---------|------------|---------------|------------|
| 331.00  | 26.00 | 80.00  | 180.00 | 24.69 | 2.00  | 1.00      | 2.00      | 1.00           | 0.00    | 0.00         | 1.00   | 3.00   | 6.00         | 68.57      | 2.00   | 16.00         | 0.00      | 6.00       | 0.00    | 17.00      | 68.00         | 0.00       |
| 332.00  | 24.00 | 70.00  | 168.00 | 24.80 | 2.00  | 1.00      | 2.00      | 1.00           | 0.00    | 0.00         | 1.00   | 3.00   | 7.00         | 100.00     | 2.00   | 41.00         | 1.00      | 2.00       | 1.00    | 15.00      | 60.00         | 0.00       |
| 333.00  | 25.00 | 60.00  | 176.00 | 19.37 | 2.00  | 1.00      | 3.00      | 1.00           | 0.00    | 0.00         | 1.00   | 1.00   | 6.50         | 48.57      | 2.00   | 36.00         | 1.00      | 8.00       | 0.00    | 14.00      | 56.00         | 0.00       |
| 334.00  | 26.00 | 42.00  | 151.00 | 18.42 | 1.00  | 1.00      | 3.00      | 1.00           | 0.00    | 0.00         | 0.00   | 3.00   | 5.00         | 81.43      | 2.00   | 27.00         | 0.00      | 7.00       | 0.00    | 19.00      | 76.00         | 0.00       |
| 335.00  | 28.00 | 74.00  | 152.00 | 32.03 | 4.00  | 0.00      | 2.00      | 1.00           | 0.00    | 0.00         | 0.00   | 3.00   | 2.00         | 57.14      | 2.00   | 37.00         | 1.00      | 3.00       | 1.00    | 18.00      | 72.00         | 0.00       |
| 336.00  | 31.00 | 80.00  | 174.00 | 26.42 | 3.00  | 1.00      | 2.00      | 2.00           | 0.00    | 0.00         | 1.00   | 2.00   | 9.00         | 45.00      | 2.00   | 37.00         | 1.00      | 3.00       | 1.00    | 19.00      | 76.00         | 0.00       |
| 337.00  | 28.00 | 74.00  | 169.00 | 25.91 | 3.00  | 1.00      | 2.00      | 2.00           | 1.00    | 0.00         | 0.00   | 3.00   | 5.00         | 85.71      | 2.00   | 23.00         | 0.00      | 3.00       | 1.00    | 17.00      | 68.00         | 0.00       |
| 338.00  | 25.00 | 100.00 | 184.00 | 29.54 | 3.00  | 1.00      | 2.00      | 1.00           | 0.00    | 0.00         | 1.00   | 3.00   | 10.00        | 70.71      | 2.00   | 38.00         | 1.00      | 1.00       | 1.00    | 18.00      | 72.00         | 0.00       |
| 339.00  | 29.00 | 86.00  | 175.00 | 28.08 | 3.00  | 1.00      | 2.00      | 1.00           | 1.00    | 1.00         | 1.00   | 2.00   | 8.00         | 108.57     | 2.00   | 23.00         | 0.00      | 9.00       | 0.00    | 21.00      | 84.00         | 0.00       |
| 340.00  | 29.00 | 70.00  | 171.00 | 23.94 | 2.00  | 1.00      | 2.00      | 2.00           | 0.00    | 0.00         | 1.00   | 3.00   | 6.50         | 68.57      | 2.00   | 24.00         | 0.00      | 5.00       | 1.00    | 16.00      | 64.00         | 0.00       |
| 341.00  | 26.00 | 55.00  | 170.00 | 19.03 | 2.00  | 0.00      | 2.00      | 2.00           | 0.00    | 0.00         | 0.00   | 3.00   | 5.00         | 68.57      | 2.00   | 28.00         | 0.00      | 7.00       | 0.00    | 15.00      | 60.00         | 0.00       |
| 342.00  | 24.00 | 58.00  | 168.00 | 20.55 | 2.00  | 1.00      | 2.00      | 1.00           | 1.00    | 1.00         | 1.00   | 2.00   | 5.50         | 62.14      | 2.00   | 26.00         | 0.00      | 3.00       | 1.00    | 16.00      | 64.00         | 0.00       |
| 343.00  | 28.00 | 81.00  | 184.00 | 23.92 | 2.00  | 0.00      | 2.00      | 1.00           | 0.00    | 1.00         | 1.00   | 3.00   | 10.00        | 102.86     | 2.00   | 30.00         | 1.00      | 6.00       | 0.00    | 18.00      | 72.00         | 0.00       |
| 344.00  | 28.00 | 53.00  | 170.00 | 18.34 | 1.00  | 1.00      | 2.00      | 2.00           | 1.00    | 0.00         | 1.00   | 3.00   | 6.50         | 93.57      | 2.00   | 32.00         | 1.00      | 6.00       | 0.00    | 14.00      | 56.00         | 0.00       |
| 345.00  | 27.00 | 70.00  | 163.00 | 26.35 | 3.00  | 0.00      | 1.00      | 2.00           | 0.00    | 0.00         | 0.00   | 1.00   | 4.50         | 51.43      | 2.00   | 30.00         | 1.00      | 3.00       | 1.00    | 13.00      | 52.00         | 0.00       |
| 346.00  | 24.00 | 90.00  | 176.00 | 29.05 | 3.00  | 1.00      | 2.00      | 1.00           | 1.00    | 0.00         | 1.00   | 3.00   | 1.00         | 73.57      | 2.00   | 24.00         | 0.00      | 11.00      | 0.00    | 16.00      | 64.00         | 0.00       |
| 347.00  | 32.00 | 60.00  | 165.00 | 22.04 | 2.00  | 1.00      | 3.00      | 1.00           | 0.00    | 0.00         | 0.00   | 3.00   | 6.00         | 82.14      | 2.00   | 33.00         | 1.00      | 1.00       | 1.00    | 20.00      | 80.00         | 0.00       |
| 348.00  | 42.00 | 77.00  | 156.00 | 31.64 | 4.00  | 1.00      | 1.00      | 2.00           | 0.00    | 0.00         | 0.00   | 3.00   | 6.00         | 64.29      | 2.00   | 36.00         | 1.00      | 6.00       | 0.00    | 19.00      | 76.00         | 0.00       |
| 349.00  | 43.00 | 88.00  | 170.00 | 30.45 | 4.00  | 1.00      | 2.00      | 2.00           | 0.00    | 0.00         | 1.00   | 3.00   | 7.00         | 64.29      | 2.00   | 35.00         | 1.00      | 2.00       | 1.00    | 15.00      | 60.00         | 0.00       |
| 350.00  | 41.00 | 93.00  | 190.00 | 25.76 | 3.00  | 1.00      | 2.00      | 2.00           | 0.00    | 0.00         | 1.00   | 3.00   | 8.00         | 42.86      | 2.00   | 28.00         | 0.00      | 2.00       | 1.00    | 16.00      | 64.00         | 0.00       |
| 351.00  | 38.00 | 85.00  | 172.00 | 28.73 | 3.00  | 1.00      | 2.00      | 1.00           | 0.00    | 0.00         | 1.00   | 3.00   | 6.50         | 51.43      | 2.00   | 30.00         | 1.00      | 5.00       | 1.00    | 19.00      | 76.00         | 0.00       |
| 352.00  | 38.00 | 78.00  | 172.00 | 26.37 | 3.00  | 1.00      | 3.00      | 2.00           | 1.00    | 0.00         | 1.00   | 3.00   | 2.50         | 65.71      | 2.00   | 38.00         | 1.00      | 2.00       | 1.00    | 19.00      | 76.00         | 0.00       |
| 353.00  | 40.00 | 89.00  | 187.00 | 25.45 | 3.00  | 1.00      | 3.00      | 2.00           | 1.00    | 1.00         | 1.00   | 3.00   | 8.00         | 77.14      | 2.00   | 32.00         | 1.00      | 8.00       | 0.00    | 16.00      | 64.00         | 0.00       |
| 354.00  | 38.00 | 60.00  | 160.00 | 23.44 | 2.00  | 1.00      | 2.00      | 3.00           | 1.00    | 0.00         | 0.00   | 3.00   | 7.00         | 44.29      | 2.00   | 32.00         | 1.00      | 4.00       | 1.00    | 20.00      | 80.00         | 0.00       |
| 355.00  | 37.00 | 80.00  | 185.00 | 23.37 | 2.00  | 1.00      | 2.00      | 1.00           | 0.00    | 0.00         | 1.00   | 3.00   | 9.00         | 64.29      | 2.00   | 30.00         | 1.00      | 10.00      | 0.00    | 18.00      | 72.00         | 0.00       |
| 356.00  | 34.00 | 90.00  | 171.00 | 30.78 | 4.00  | 1.00      | 2.00      | 1.00           | 0.00    | 0.00         | 1.00   | 3.00   | 4.00         | 55.71      | 2.00   | 33.00         | 1.00      | 5.00       | 1.00    | 18.00      | 72.00         | 0.00       |
| 357.00  | 34.00 | 113.00 | 180.00 | 34.88 | 4.00  | 0.00      | 2.00      | 2.00           | 1.00    | 1.00         | 1.00   | 2.00   | 5.00         | 75.00      | 2.00   | 22.00         | 0.00      | 9.00       | 0.00    | 19.00      | 76.00         | 0.00       |
| 358.00  | 34.00 | 75.00  | 170.00 | 25.95 | 3.00  | 0.00      | 2.00      | 2.00           | 0.00    | 0.00         | 1.00   | 3.00   | 7.00         | 102.86     | 2.00   | 26.00         | 0.00      | 0.00       | 1.00    | 20.00      | 80.00         | 0.00       |
| 359.00  | 40.00 | 95.00  | 185.00 | 27.76 | 3.00  | 1.00      | 2.00      | 2.00           | 0.00    | 1.00         | 1.00   | 3.00   | 9.00         | 55.71      | 2.00   | 26.00         | 0.00      | 7.00       | 0.00    | 19.00      | 76.00         | 0.00       |
| 360.00  | 34.00 | 70.00  | 169.00 | 24.51 | 2.00  | 1.00      | 2.00      | 1.00           | 1.00    | 1.00         | 1.00   | 2.00   | 3.00         | 75.14      | 2.00   | 26.00         | 0.00      | 3.00       | 1.00    | 16.00      | 64.00         | 0.00       |
| 361.00  | 40.00 | 60.00  | 160.00 | 23.44 | 2.00  | 1.00      | 2.00      | 2.00           | 1.00    | 1.00         | 0.00   | 2.00   | 7.00         | 42.86      | 2.00   | 32.00         | 1.00      | 3.00       | 1.00    | 17.00      | 68.00         | 0.00       |
| 362.00  | 36.00 | 55.00  | 173.00 | 18.38 | 1.00  | 1.00      | 2.00      | 1.00           | 0.00    | 0.00         | 0.00   | 2.00   | 9.00         | 47.14      | 2.00   | 40.00         | 1.00      | 14.00      | 0.00    | 12.00      | 48.00         | 1.00       |
| 363.00  | 36.00 | 81.00  | 182.00 | 24.45 | 2.00  | 1.00      | 2.00      | 2.00           | 0.00    | 0.00         | 1.00   | 2.00   | 3.50         | 94.29      | 2.00   | 29.00         | 0.00      | 6.00       | 0.00    | 17.00      | 68.00         | 0.00       |
| 364.00  | 35.00 | 50.00  | 155.00 | 20.81 | 2.00  | 1.00      | 3.00      | 2.00           | 0.00    | 0.00         | 0.00   | 3.00   | 6.50         | 111.43     | 2.00   | 36.00         | 1.00      | 3.00       | 1.00    | 19.00      | 76.00         | 0.00       |
| 365.00  | 36.00 | 95.00  | 180.00 | 29.32 | 3.00  | 1.00      | 1.00      | 3.00           | 0.00    | 0.00         | 1.00   | 3.00   | 8.00         | 49.29      | 2.00   | 31.00         | 1.00      | 6.00       | 0.00    | 13.00      | 52.00         | 0.00       |
| 366.00  | 38.00 | 57.00  | 163.00 | 21.45 | 2.00  | 1.00      | 2.00      | 1.00           | 0.00    | 0.00         | 0.00   | 3.00   | 4.00         | 56.43      | 2.00   | 34.00         | 1.00      | 2.00       | 1.00    | 22.00      | 88.00         | 0.00       |
| 367.00  | 38.00 | 57.00  | 164.00 | 21.19 | 2.00  | 1.00      | 2.00      | 2.00           | 0.00    | 1.00         | 0.00   | 3.00   | 1.50         | 55.71      | 2.00   | 37.00         | 1.00      | 4.00       | 1.00    | 18.00      | 72.00         | 0.00       |
| 368.00  | 34.00 | 74.50  | 174.00 | 24.61 | 2.00  | 1.00      | 3.00      | 2.00           | 1.00    | 0.00         | 1.00   | 3.00   | 8.00         | 53.57      | 2.00   | 30.00         | 1.00      | 6.00       | 0.00    | 17.00      | 68.00         | 0.00       |
| 369.00  | 40.00 | 80.00  | 175.00 | 26.12 | 3.00  | 1.00      | 2.00      | 2.00           | 0.00    | 0.00         | 1.00   | 3.00   | 8.00         | 30.00      | 2.00   | 31.00         | 1.00      | 7.00       | 0.00    | 12.00      | 48.00         | 1.00       |
| 370.00  | 38.00 | 80.00  | 170.00 | 27.68 | 3.00  | 1.00      | 3.00      | 2.00           | 1.00    | 1.00         | 0.00   | 3.00   | 3.50         | 68.57      | 2.00   | 35.00         | 1.00      | 8.00       | 0.00    | 17.00      | 68.00         | 0.00       |
| 371.00  | 44.00 | 90.00  | 167.00 | 32.27 | 4.00  | 1.00      | 2.00      | 2.00           | 0.00    | 1.00         | 0.00   | 2.00   | 3.00         | 107.14     | 2.00   | 36.00         | 1.00      | 5.00       | 1.00    | 19.00      | 76.00         | 0.00       |
| 372.00  | 36.00 | 108.00 | 180.00 | 33.33 | 4.00  | 1.00      | 2.00      | 1.00           | 1.00    | 1.00         | 1.00   | 1.00   | 7.00         | 77.14      | 2.00   | 34.00         | 1.00      | 6.00       | 0.00    | 16.00      | 64.00         | 0.00       |
| 373.00  | 34.00 | 62.00  | 155.00 | 25.81 | 3.00  | 1.00      | 2.00      | 2.00           | 0.00    | 0.00         | 0.00   | 2.00   | 7.00         | 30.00      | 2.00   | 27.00         | 0.00      | 1.00       | 1.00    | 17.00      | 68.00         | 0.00       |
| 374.00  | 38.00 | 80.00  | 175.00 | 26.12 | 3.00  | 1.00      | 2.00      | 2.00           | 0.00    | 0.00         | 0.00   | 3.00   | 6.00         | 59.29      | 2.00   | 41.00         | 1.00      | 0.00       | 1.00    | 20.00      | 80.00         | 0.00       |
| 375.00  | 35.00 | 87.00  | 176.00 | 28.09 | 3.00  | 1.00      | 3.00      | 2.00           | 0.00    | 0.00         | 1.00   | 1.00   | 6.50         | 89.14      | 2.00   | 27.00         | 0.00      | 3.00       | 1.00    | 16.00      | 64.00         | 0.00       |
| 376.00  | 43.00 | 56.00  | 160.00 | 21.88 | 2.00  | 1.00      | 2.00      | 2.00           | 0.00    | 0.00         | 0.00   | 2.00   | 3.00         | 38.57      | 2.00   | 37.00         | 1.00      | 6.00       | 0.00    | 19.00      | 76.00         | 0.00       |
| 377.00  | 34.00 | 72.00  | 172.00 | 24.34 | 2.00  | 1.00      | 2.00      | 2.00           | 1.00    | 1.00         | 1.00   | 3.00   | 8.00         | 42.86      | 2.00   | 24.00         | 0.00      | 4.00       | 1.00    | 16.00      | 64.00         | 0.00       |
| 378.00  | 34.00 | 63.00  | 166.00 | 22.86 | 2.00  | 1.00      | 3.00      | 2.00           | 0.00    | 0.00         | 1.00   | 3.00   | 5.00         | 107.14     | 2.00   | 25.00         | 0.00      | 3.00       | 1.00    | 18.00      | 72.00         | 0.00       |
| 379.00  | 34.00 | 77.00  | 160.00 | 30.08 | 4.00  | 1.00      | 3.00      | 3.00           | 1.00    | 0.00         | 0.00   | 3.00   | 7.00         | 69.71      | 2.00   | 23.00         | 0.00      | 6.00       | 0.00    | 17.00      | 68.00         | 0.00       |
| 380.00  | 37.00 | 95.00  | 175.00 | 31.02 | 4.00  | 0.00      | 3.00      | 2.00           | 0.00    | 0.00         | 1.00   | 3.00   | 6.00         | 71.43      | 2.00   | 26.00         | 0.00      | 9.00       | 0.00    | 22.00      | 88.00         | 0.00       |
| 381.00  | 42.00 | 94.00  | 191.00 | 25.77 | 3.00  | 0.00      | 3.00      | 2.00           | 1.00    | 0.00         | 1.00   | 3.00   | 6.00         | 94.29      | 2.00   | 33.00         | 1.00      | 3.00       | 1.00    | 17.00      | 68.00         | 0.00       |
| 382.00  | 43.00 | 86.00  | 170.00 | 29.76 | 3.00  | 1.00      | 3.00      | 2.00           | 1.00    | 0.00         | 1.00   | 3.00   | 7.00         | 96.43      | 2.00   | 38.00         | 1.00      | 2.00       | 1.00    | 16.00      | 64.00         | 0.00       |
| 383.00  | 35.00 | 78.00  | 176.00 | 25.18 | 3.00  | 1.00      | 3.00      | 1.00           | 0.00    | 0.00         | 1.00   | 3.00   | 8.00         | 77.14      | 2.00   | 29.00         | 0.00      | 3.00       | 1.00    | 21.00      | 84.00         | 0.00       |
| 384.00  | 38.00 | 87.00  | 181.00 | 26.56 | 3.00  | 1.00      | 3.00      | 2.00           | 0.00    | 0.00         | 1.00   | 3.00   | 7.00         | 55.71      | 2.00   | 25.00         | 0.00      | 2.00       | 1.00    | 17.00      | 68.00         | 0.00       |
| 385.00  | 40.00 | 64.00  | 172.00 | 21.63 | 2.00  | 1.00      | 3.00      |                |         |              |        |        |              |            |        |               |           |            |         |            |               |            |

| Subject | Age   | Weight | Height | BMI   | BMI_C | Residence | Education | Marital_Status | Smoking | Chronic_Dise | Gender | Health | Sitting_Time | PA_Min_Day | IPAQ_C | Dietary_Score | Dietary_C | PSQI_Total | Sleep_C | WHO5_Total | WHO5_Total100 | WHO5_Class |
|---------|-------|--------|--------|-------|-------|-----------|-----------|----------------|---------|--------------|--------|--------|--------------|------------|--------|---------------|-----------|------------|---------|------------|---------------|------------|
| 397.00  | 39.00 | 85.00  | 175.00 | 27.76 | 3.00  | 1.00      | 2.00      | 2.00           | 0.00    | 1.00         | 1.00   | 3.00   | 2.00         | 85.71      | 2.00   | 28.00         | 0.00      | 8.00       | 0.00    | 17.00      | 68.00         | 0.00       |
| 398.00  | 40.00 | 74.00  | 168.00 | 26.22 | 3.00  | 0.00      | 2.00      | 2.00           | 0.00    | 1.00         | 0.00   | 3.00   | 4.00         | 74.29      | 2.00   | 30.00         | 1.00      | 0.00       | 1.00    | 19.00      | 76.00         | 0.00       |
| 399.00  | 35.00 | 87.00  | 177.00 | 27.77 | 3.00  | 1.00      | 3.00      | 2.00           | 0.00    | 0.00         | 1.00   | 2.00   | 6.00         | 65.71      | 2.00   | 26.00         | 0.00      | 7.00       | 0.00    | 14.00      | 56.00         | 0.00       |
| 400.00  | 39.00 | 75.00  | 165.00 | 27.55 | 3.00  | 1.00      | 3.00      | 2.00           | 0.00    | 0.00         | 1.00   | 2.00   | 6.00         | 65.71      | 2.00   | 33.00         | 1.00      | 6.00       | 0.00    | 19.00      | 76.00         | 0.00       |
| 401.00  | 35.00 | 75.00  | 167.00 | 26.89 | 3.00  | 1.00      | 3.00      | 2.00           | 0.00    | 0.00         | 0.00   | 3.00   | 8.00         | 81.43      | 2.00   | 34.00         | 1.00      | 4.00       | 1.00    | 19.00      | 76.00         | 0.00       |
| 402.00  | 39.00 | 73.00  | 165.00 | 26.81 | 3.00  | 0.00      | 3.00      | 2.00           | 0.00    | 0.00         | 1.00   | 3.00   | 7.00         | 80.00      | 2.00   | 27.00         | 0.00      | 0.00       | 1.00    | 21.00      | 84.00         | 0.00       |
| 403.00  | 42.00 | 80.00  | 170.00 | 27.68 | 3.00  | 1.00      | 3.00      | 2.00           | 0.00    | 1.00         | 1.00   | 3.00   | 6.50         | 57.86      | 2.00   | 36.00         | 1.00      | 12.00      | 0.00    | 15.00      | 60.00         | 0.00       |
| 404.00  | 38.00 | 64.00  | 166.00 | 23.23 | 2.00  | 1.00      | 2.00      | 1.00           | 0.00    | 0.00         | 0.00   | 3.00   | 6.50         | 98.57      | 2.00   | 29.00         | 0.00      | 6.00       | 0.00    | 14.00      | 56.00         | 0.00       |
| 405.00  | 40.00 | 65.00  | 169.00 | 22.76 | 2.00  | 1.00      | 2.00      | 2.00           | 0.00    | 0.00         | 1.00   | 3.00   | 2.00         | 111.43     | 2.00   | 37.00         | 1.00      | 5.00       | 1.00    | 22.00      | 88.00         | 0.00       |
| 406.00  | 42.00 | 69.00  | 176.00 | 22.28 | 2.00  | 1.00      | 2.00      | 2.00           | 0.00    | 0.00         | 0.00   | 3.00   | 2.50         | 90.00      | 2.00   | 23.00         | 0.00      | 3.00       | 1.00    | 19.00      | 76.00         | 0.00       |
| 407.00  | 39.00 | 70.00  | 170.00 | 24.22 | 2.00  | 1.00      | 3.00      | 2.00           | 0.00    | 0.00         | 1.00   | 3.00   | 4.50         | 68.57      | 2.00   | 30.00         | 1.00      | 6.00       | 0.00    | 19.00      | 76.00         | 0.00       |
| 408.00  | 38.00 | 50.00  | 170.00 | 17.30 | 1.00  | 1.00      | 2.00      | 2.00           | 1.00    | 0.00         | 0.00   | 2.00   | 3.50         | 84.29      | 2.00   | 28.00         | 0.00      | 12.00      | 0.00    | 15.00      | 60.00         | 0.00       |
| 409.00  | 46.00 | 67.00  | 160.00 | 26.17 | 3.00  | 1.00      | 2.00      | 3.00           | 0.00    | 0.00         | 0.00   | 3.00   | 5.00         | 68.57      | 2.00   | 37.00         | 1.00      | 3.00       | 1.00    | 18.00      | 72.00         | 0.00       |
| 410.00  | 54.00 | 95.00  | 185.00 | 27.76 | 3.00  | 0.00      | 2.00      | 2.00           | 0.00    | 0.00         | 1.00   | 3.00   | 8.00         | 64.29      | 2.00   | 37.00         | 1.00      | 2.00       | 1.00    | 18.00      | 72.00         | 0.00       |
| 411.00  | 67.00 | 77.00  | 165.00 | 28.28 | 3.00  | 1.00      | 2.00      | 2.00           | 1.00    | 1.00         | 1.00   | 3.00   | 4.00         | 114.00     | 2.00   | 31.00         | 1.00      | 5.00       | 1.00    | 20.00      | 80.00         | 0.00       |
| 412.00  | 46.00 | 88.00  | 182.00 | 26.57 | 3.00  | 1.00      | 3.00      | 2.00           | 0.00    | 0.00         | 1.00   | 3.00   | 6.00         | 84.29      | 2.00   | 33.00         | 1.00      | 5.00       | 1.00    | 16.00      | 64.00         | 0.00       |
| 413.00  | 53.00 | 63.00  | 153.00 | 26.91 | 3.00  | 1.00      | 3.00      | 2.00           | 0.00    | 0.00         | 0.00   | 3.00   | 10.00        | 77.14      | 2.00   | 28.00         | 0.00      | 5.00       | 1.00    | 17.00      | 68.00         | 0.00       |
| 414.00  | 63.00 | 79.00  | 173.00 | 26.40 | 3.00  | 1.00      | 3.00      | 2.00           | 1.00    | 0.00         | 1.00   | 3.00   | 11.00        | 90.00      | 2.00   | 42.00         | 1.00      | 4.00       | 1.00    | 19.00      | 76.00         | 0.00       |
| 415.00  | 60.00 | 80.00  | 170.00 | 27.68 | 3.00  | 0.00      | 2.00      | 2.00           | 1.00    | 1.00         | 1.00   | 2.00   | 5.00         | 34.29      | 2.00   | 37.00         | 1.00      | 1.00       | 1.00    | 20.00      | 80.00         | 0.00       |
| 416.00  | 52.00 | 123.00 | 185.00 | 35.94 | 4.00  | 0.00      | 1.00      | 2.00           | 1.00    | 0.00         | 1.00   | 2.00   | 9.00         | 90.00      | 2.00   | 25.00         | 0.00      | 5.00       | 1.00    | 12.00      | 48.00         | 1.00       |
| 417.00  | 52.00 | 100.00 | 184.00 | 29.54 | 3.00  | 1.00      | 1.00      | 2.00           | 0.00    | 0.00         | 1.00   | 3.00   | 2.50         | 68.57      | 2.00   | 34.00         | 1.00      | 2.00       | 1.00    | 17.00      | 68.00         | 0.00       |
| 418.00  | 50.00 | 60.00  | 168.00 | 21.26 | 2.00  | 1.00      | 2.00      | 2.00           | 0.00    | 0.00         | 0.00   | 3.00   | 6.50         | 72.86      | 2.00   | 36.00         | 1.00      | 2.00       | 1.00    | 16.00      | 64.00         | 0.00       |
| 419.00  | 45.00 | 65.00  | 163.00 | 24.46 | 2.00  | 1.00      | 2.00      | 2.00           | 1.00    | 1.00         | 0.00   | 2.00   | 3.00         | 92.14      | 2.00   | 35.00         | 1.00      | 9.00       | 0.00    | 17.00      | 68.00         | 0.00       |
| 420.00  | 60.00 | 64.00  | 163.00 | 24.09 | 2.00  | 1.00      | 2.00      | 2.00           | 1.00    | 1.00         | 0.00   | 3.00   | 7.00         | 81.43      | 2.00   | 35.00         | 1.00      | 4.00       | 1.00    | 18.00      | 72.00         | 0.00       |
| 421.00  | 66.00 | 86.00  | 175.00 | 28.08 | 3.00  | 1.00      | 3.00      | 2.00           | 0.00    | 0.00         | 1.00   | 3.00   | 9.00         | 81.43      | 2.00   | 29.00         | 0.00      | 3.00       | 1.00    | 18.00      | 72.00         | 0.00       |
| 422.00  | 50.00 | 96.00  | 168.00 | 34.01 | 4.00  | 1.00      | 2.00      | 2.00           | 1.00    | 1.00         | 0.00   | 3.00   | 11.00        | 101.43     | 2.00   | 28.00         | 0.00      | 12.00      | 0.00    | 12.00      | 48.00         | 1.00       |
| 423.00  | 48.00 | 107.00 | 183.00 | 31.95 | 4.00  | 0.00      | 2.00      | 2.00           | 0.00    | 0.00         | 1.00   | 3.00   | 10.00        | 41.43      | 2.00   | 27.00         | 0.00      | 3.00       | 1.00    | 17.00      | 68.00         | 0.00       |
| 424.00  | 47.00 | 110.00 | 170.00 | 38.06 | 4.00  | 1.00      | 2.00      | 1.00           | 1.00    | 1.00         | 1.00   | 1.00   | 11.00        | 77.14      | 2.00   | 29.00         | 0.00      | 15.00      | 0.00    | 7.00       | 28.00         | 1.00       |
| 425.00  | 47.00 | 110.00 | 170.00 | 38.06 | 4.00  | 1.00      | 2.00      | 2.00           | 0.00    | 1.00         | 1.00   | 2.00   | 2.00         | 72.86      | 2.00   | 33.00         | 1.00      | 4.00       | 1.00    | 17.00      | 68.00         | 0.00       |
| 426.00  | 58.00 | 96.00  | 169.00 | 33.61 | 4.00  | 1.00      | 2.00      | 2.00           | 1.00    | 1.00         | 1.00   | 2.00   | 5.00         | 85.71      | 2.00   | 41.00         | 1.00      | 6.00       | 0.00    | 15.00      | 60.00         | 0.00       |
| 427.00  | 45.00 | 110.00 | 189.00 | 30.79 | 4.00  | 1.00      | 2.00      | 2.00           | 0.00    | 1.00         | 1.00   | 3.00   | 7.00         | 58.57      | 2.00   | 25.00         | 0.00      | 6.00       | 0.00    | 19.00      | 76.00         | 0.00       |
| 428.00  | 48.00 | 90.00  | 175.00 | 29.39 | 3.00  | 0.00      | 2.00      | 2.00           | 1.00    | 1.00         | 1.00   | 1.00   | 7.00         | 104.29     | 2.00   | 30.00         | 1.00      | 7.00       | 0.00    | 13.00      | 52.00         | 0.00       |
| 429.00  | 55.00 | 73.00  | 175.00 | 23.84 | 2.00  | 1.00      | 2.00      | 2.00           | 1.00    | 0.00         | 1.00   | 2.00   | 4.00         | 92.14      | 2.00   | 25.00         | 0.00      | 6.00       | 0.00    | 17.00      | 68.00         | 0.00       |
| 430.00  | 55.00 | 48.00  | 150.00 | 21.33 | 2.00  | 1.00      | 2.00      | 2.00           | 0.00    | 0.00         | 0.00   | 3.00   | 1.50         | 56.43      | 2.00   | 26.00         | 0.00      | 1.00       | 1.00    | 21.00      | 84.00         | 0.00       |
| 431.00  | 65.00 | 102.00 | 181.00 | 31.13 | 4.00  | 1.00      | 3.00      | 3.00           | 0.00    | 0.00         | 1.00   | 3.00   | 6.00         | 90.71      | 2.00   | 34.00         | 1.00      | 86.21      | 0.00    | 21.00      | 84.00         | 0.00       |
| 432.00  | 54.00 | 110.00 | 191.00 | 30.15 | 4.00  | 1.00      | 3.00      | 2.00           | 0.00    | 0.00         | 1.00   | 3.00   | 10.00        | 85.71      | 2.00   | 27.00         | 0.00      | 3.00       | 1.00    | 16.00      | 64.00         | 0.00       |
| 433.00  | 50.00 | 101.00 | 179.00 | 31.52 | 4.00  | 0.00      | 3.00      | 2.00           | 1.00    | 0.00         | 1.00   | 3.00   | 7.00         | 62.14      | 2.00   | 34.00         | 1.00      | 3.00       | 1.00    | 16.00      | 64.00         | 0.00       |
| 434.00  | 69.00 | 107.00 | 180.00 | 33.02 | 4.00  | 1.00      | 3.00      | 2.00           | 1.00    | 1.00         | 1.00   | 2.00   | 7.00         | 115.71     | 2.00   | 35.00         | 1.00      | 11.00      | 0.00    | 14.00      | 56.00         | 0.00       |
| 435.00  | 61.00 | 105.00 | 173.00 | 35.08 | 4.00  | 1.00      | 3.00      | 2.00           | 1.00    | 1.00         | 1.00   | 2.00   | 5.00         | 102.86     | 2.00   | 32.00         | 1.00      | 7.00       | 0.00    | 17.00      | 68.00         | 0.00       |
| 436.00  | 50.00 | 99.00  | 178.00 | 31.25 | 4.00  | 1.00      | 3.00      | 2.00           | 0.00    | 1.00         | 1.00   | 2.00   | 7.00         | 82.86      | 2.00   | 30.00         | 1.00      | 3.00       | 1.00    | 18.00      | 72.00         | 0.00       |
| 437.00  | 64.00 | 84.00  | 162.00 | 32.01 | 4.00  | 1.00      | 3.00      | 1.00           | 0.00    | 1.00         | 0.00   | 3.00   | 3.50         | 42.86      | 2.00   | 39.00         | 1.00      | 3.00       | 1.00    | 20.00      | 80.00         | 0.00       |
| 438.00  | 50.00 | 92.00  | 178.00 | 29.04 | 3.00  | 1.00      | 3.00      | 2.00           | 0.00    | 0.00         | 1.00   | 2.00   | 8.00         | 71.43      | 2.00   | 33.00         | 1.00      | 4.00       | 1.00    | 17.00      | 68.00         | 0.00       |
| 439.00  | 48.00 | 94.00  | 186.00 | 27.17 | 3.00  | 1.00      | 3.00      | 2.00           | 0.00    | 0.00         | 1.00   | 3.00   | 6.00         | 111.43     | 2.00   | 33.00         | 1.00      | 4.00       | 1.00    | 20.00      | 80.00         | 0.00       |
| 440.00  | 57.00 | 90.00  | 175.00 | 29.39 | 3.00  | 1.00      | 3.00      | 2.00           | 0.00    | 0.00         | 1.00   | 3.00   | 8.00         | 68.57      | 2.00   | 34.00         | 1.00      | 1.00       | 1.00    | 21.00      | 84.00         | 0.00       |
| 441.00  | 63.00 | 95.00  | 185.00 | 27.76 | 3.00  | 1.00      | 3.00      | 2.00           | 0.00    | 0.00         | 1.00   | 3.00   | 8.00         | 75.00      | 2.00   | 28.00         | 0.00      | 3.00       | 1.00    | 18.00      | 72.00         | 0.00       |
| 442.00  | 60.00 | 87.00  | 171.00 | 29.75 | 3.00  | 1.00      | 3.00      | 2.00           | 0.00    | 0.00         | 1.00   | 3.00   | 5.00         | 64.29      | 2.00   | 34.00         | 1.00      | 2.00       | 1.00    | 19.00      | 76.00         | 0.00       |
| 443.00  | 50.00 | 79.00  | 165.00 | 29.02 | 3.00  | 1.00      | 3.00      | 2.00           | 0.00    | 0.00         | 1.00   | 3.00   | 6.00         | 115.71     | 2.00   | 27.00         | 0.00      | 5.00       | 1.00    | 17.00      | 68.00         | 0.00       |
| 444.00  | 46.00 | 90.00  | 182.00 | 27.17 | 3.00  | 1.00      | 3.00      | 2.00           | 0.00    | 0.00         | 1.00   | 3.00   | 5.50         | 85.71      | 2.00   | 28.00         | 0.00      | 5.00       | 1.00    | 16.00      | 64.00         | 0.00       |
| 445.00  | 49.00 | 96.00  | 184.00 | 28.36 | 3.00  | 1.00      | 3.00      | 2.00           | 0.00    | 1.00         | 1.00   | 2.00   | 6.50         | 57.86      | 2.00   | 33.00         | 1.00      | 6.00       | 0.00    | 17.00      | 68.00         | 0.00       |
| 446.00  | 53.00 | 88.00  | 172.00 | 29.75 | 3.00  | 1.00      | 3.00      | 2.00           | 1.00    | 1.00         | 1.00   | 2.00   | 8.00         | 77.14      | 2.00   | 30.00         | 1.00      | 10.00      | 0.00    | 21.00      | 84.00         | 0.00       |
| 447.00  | 50.00 | 60.00  | 160.00 | 23.44 | 2.00  | 1.00      | 3.00      | 2.00           | 0.00    | 0.00         | 1.00   | 3.00   | 2.50         | 70.71      | 2.00   | 28.00         | 0.00      | 4.00       | 1.00    | 18.00      | 72.00         | 0.00       |
| 448.00  | 50.00 | 70.00  | 170.00 | 24.22 | 2.00  | 1.00      | 3.00      | 2.00           | 1.00    | 0.00         | 0.00   | 3.00   | 4.00         | 55.71      | 2.00   | 42.00         | 1.00      | 3.00       | 1.00    | 18.00      | 72.00         | 0.00       |
| 449.00  | 48.00 | 74.00  | 177.00 | 23.62 | 2.00  | 1.00      | 3.00      | 1.00           | 1.00    | 0.00         | 1.00   | 3.00   | 7.00         | 110.00     | 2.00   | 28.00         | 0.00      | 1.00       | 1.00    | 19.00      | 76.00         | 0.00       |
| 450.00  | 50.00 | 75.00  | 175.00 | 24.49 | 2.00  | 0.00      | 3.00      | 2.00           | 1.00    | 1.00         | 1.00   | 2.00   | 6.00         | 77.14      | 2.00   | 34.00         | 1.00      | 6.00       | 0.00    | 21.00      | 84.00         | 0.00       |
| 451.00  | 53.00 | 70.00  | 150.00 | 31.11 | 4.00  |           |           |                |         |              |        |        |              |            |        |               |           |            |         |            |               |            |

| Subject | Age   | Weight | Height | BMI   | BMI_C | Residence | Education | Marital_Status | Smoking | Chronic_Dise | Gender | Health | Sitting_Time | PA_Min_Day | IPAQ_C | Dietary_Score | Dietary_C | PSQI_Total | Sleep_C | WHO5_Total | WHO5_Total100 | WHO5_Class |      |
|---------|-------|--------|--------|-------|-------|-----------|-----------|----------------|---------|--------------|--------|--------|--------------|------------|--------|---------------|-----------|------------|---------|------------|---------------|------------|------|
| 463.00  | 20.00 | 53.00  | 167.00 | 19.00 | 2.00  | 1.00      | 1.00      | 1.00           | 1.00    | 0.00         | 0.00   | 0.00   | 2.00         | 5.50       | 12.86  | 1.00          | 34.00     | 1.00       | 10.00   | 0.00       | 2.00          | 8.00       | 1.00 |
| 464.00  | 18.00 | 82.00  | 188.00 | 23.20 | 2.00  | 1.00      | 1.00      | 1.00           | 1.00    | 0.00         | 0.00   | 1.00   | 3.00         | 6.00       | 38.57  | 1.00          | 27.00     | 0.00       | 1.00    | 1.00       | 13.00         | 52.00      | 0.00 |
| 465.00  | 21.00 | 91.00  | 188.00 | 25.75 | 3.00  | 1.00      | 2.00      | 1.00           | 1.00    | 0.00         | 0.00   | 1.00   | 3.00         | 3.50       | 53.57  | 1.00          | 36.00     | 1.00       | 6.00    | 0.00       | 15.00         | 60.00      | 0.00 |
| 466.00  | 23.00 | 60.00  | 163.00 | 22.58 | 2.00  | 1.00      | 1.00      | 1.00           | 1.00    | 0.00         | 0.00   | 0.00   | 3.00         | 12.00      | 2.14   | 1.00          | 24.00     | 0.00       | 13.00   | 0.00       | 6.00          | 24.00      | 1.00 |
| 467.00  | 21.00 | 56.00  | 152.00 | 24.24 | 2.00  | 1.00      | 1.00      | 1.00           | 1.00    | 0.00         | 0.00   | 0.00   | 3.00         | 3.50       | 17.14  | 1.00          | 34.00     | 1.00       | 4.00    | 1.00       | 16.00         | 64.00      | 0.00 |
| 468.00  | 23.00 | 53.00  | 153.00 | 22.64 | 2.00  | 1.00      | 2.00      | 1.00           | 1.00    | 0.00         | 0.00   | 0.00   | 2.00         | 7.00       | 19.29  | 1.00          | 21.00     | 0.00       | 3.00    | 1.00       | 8.00          | 32.00      | 1.00 |
| 469.00  | 20.00 | 55.00  | 159.00 | 21.76 | 2.00  | 1.00      | 2.00      | 1.00           | 1.00    | 0.00         | 0.00   | 0.00   | 3.00         | 10.00      | 21.43  | 1.00          | 27.00     | 0.00       | 9.00    | 0.00       | 10.00         | 40.00      | 1.00 |
| 470.00  | 23.00 | 68.00  | 184.00 | 20.09 | 2.00  | 0.00      | 2.00      | 1.00           | 1.00    | 0.00         | 0.00   | 1.00   | 3.00         | 12.00      | 21.43  | 1.00          | 26.00     | 0.00       | 3.00    | 1.00       | 18.00         | 72.00      | 0.00 |
| 471.00  | 21.00 | 60.00  | 163.00 | 22.58 | 2.00  | 1.00      | 2.00      | 1.00           | 1.00    | 0.00         | 0.00   | 0.00   | 3.00         | 11.00      | 17.14  | 1.00          | 25.00     | 0.00       | 10.00   | 0.00       | 11.00         | 44.00      | 1.00 |
| 472.00  | 21.00 | 54.00  | 157.00 | 21.91 | 2.00  | 0.00      | 2.00      | 1.00           | 1.00    | 0.00         | 0.00   | 0.00   | 3.00         | 4.00       | 42.86  | 1.00          | 27.00     | 0.00       | 9.00    | 0.00       | 8.00          | 32.00      | 1.00 |
| 473.00  | 19.00 | 63.00  | 174.00 | 20.81 | 2.00  | 1.00      | 2.00      | 1.00           | 1.00    | 0.00         | 0.00   | 1.00   | 3.00         | 9.00       | 38.57  | 1.00          | 22.00     | 0.00       | 6.00    | 0.00       | 12.00         | 48.00      | 1.00 |
| 474.00  | 23.00 | 60.00  | 168.00 | 21.26 | 2.00  | 1.00      | 2.00      | 1.00           | 1.00    | 0.00         | 0.00   | 1.00   | 3.00         | 4.50       | 21.43  | 1.00          | 23.00     | 0.00       | 11.00   | 0.00       | 15.00         | 60.00      | 0.00 |
| 475.00  | 23.00 | 49.00  | 159.00 | 19.38 | 2.00  | 1.00      | 2.00      | 1.00           | 1.00    | 0.00         | 0.00   | 0.00   | 3.00         | 6.50       | 42.86  | 1.00          | 34.00     | 1.00       | 8.00    | 0.00       | 14.00         | 56.00      | 0.00 |
| 476.00  | 22.00 | 45.00  | 154.00 | 18.97 | 2.00  | 1.00      | 2.00      | 1.00           | 1.00    | 1.00         | 0.00   | 0.00   | 3.00         | 11.00      | 18.57  | 1.00          | 14.00     | 0.00       | 4.00    | 1.00       | 13.00         | 52.00      | 0.00 |
| 477.00  | 20.00 | 50.00  | 163.00 | 18.82 | 2.00  | 0.00      | 2.00      | 1.00           | 1.00    | 1.00         | 1.00   | 1.00   | 1.00         | 5.50       | 12.14  | 1.00          | 20.00     | 0.00       | 7.00    | 0.00       | 9.00          | 36.00      | 1.00 |
| 478.00  | 20.00 | 73.00  | 175.00 | 23.84 | 2.00  | 1.00      | 2.00      | 1.00           | 1.00    | 1.00         | 1.00   | 2.00   | 2.00         | 7.00       | 10.00  | 1.00          | 26.00     | 0.00       | 4.00    | 1.00       | 15.00         | 60.00      | 0.00 |
| 479.00  | 21.00 | 44.00  | 155.00 | 18.31 | 1.00  | 1.00      | 2.00      | 1.00           | 1.00    | 0.00         | 0.00   | 0.00   | 2.00         | 8.00       | 42.86  | 1.00          | 30.00     | 1.00       | 1.00    | 1.00       | 13.00         | 52.00      | 0.00 |
| 480.00  | 19.00 | 110.00 | 188.00 | 31.12 | 4.00  | 1.00      | 2.00      | 1.00           | 1.00    | 0.00         | 0.00   | 1.00   | 3.00         | 1.00       | 7.86   | 1.00          | 19.00     | 0.00       | 5.00    | 1.00       | 14.00         | 56.00      | 0.00 |
| 481.00  | 22.00 | 63.00  | 136.00 | 34.06 | 4.00  | 1.00      | 2.00      | 1.00           | 1.00    | 0.00         | 0.00   | 0.00   | 3.00         | 2.50       | 25.43  | 1.00          | 26.00     | 0.00       | 7.00    | 0.00       | 16.00         | 64.00      | 0.00 |
| 482.00  | 20.00 | 73.00  | 166.00 | 26.49 | 3.00  | 1.00      | 2.00      | 1.00           | 1.00    | 0.00         | 0.00   | 0.00   | 1.00         | 4.50       | 0.00   | 1.00          | 20.00     | 0.00       | 6.00    | 0.00       | 6.00          | 24.00      | 1.00 |
| 483.00  | 23.00 | 92.80  | 178.00 | 29.29 | 3.00  | 1.00      | 2.00      | 1.00           | 1.00    | 1.00         | 1.00   | 3.00   | 3.00         | 6.50       | 49.29  | 1.00          | 27.00     | 0.00       | 5.00    | 1.00       | 15.00         | 60.00      | 0.00 |
| 484.00  | 23.00 | 74.00  | 176.00 | 23.89 | 2.00  | 0.00      | 2.00      | 1.00           | 1.00    | 0.00         | 0.00   | 1.00   | 3.00         | 1.50       | 0.00   | 1.00          | 27.00     | 0.00       | 4.00    | 1.00       | 18.00         | 72.00      | 0.00 |
| 485.00  | 23.00 | 71.00  | 173.00 | 23.72 | 2.00  | 1.00      | 2.00      | 1.00           | 1.00    | 0.00         | 0.00   | 1.00   | 3.00         | 8.00       | 31.43  | 1.00          | 27.00     | 0.00       | 7.00    | 0.00       | 7.00          | 28.00      | 1.00 |
| 486.00  | 18.00 | 95.00  | 177.00 | 30.32 | 4.00  | 1.00      | 2.00      | 1.00           | 1.00    | 0.00         | 0.00   | 1.00   | 2.00         | 8.00       | 94.29  | 1.00          | 19.00     | 0.00       | 7.00    | 0.00       | 17.00         | 68.00      | 0.00 |
| 487.00  | 22.00 | 70.00  | 161.00 | 27.01 | 3.00  | 1.00      | 1.00      | 1.00           | 1.00    | 0.00         | 0.00   | 0.00   | 3.00         | 10.00      | 0.00   | 1.00          | 14.00     | 0.00       | 8.00    | 0.00       | 12.00         | 48.00      | 1.00 |
| 488.00  | 23.00 | 74.00  | 170.00 | 25.61 | 3.00  | 1.00      | 2.00      | 1.00           | 1.00    | 1.00         | 0.00   | 0.00   | 3.00         | 11.00      | 0.00   | 1.00          | 35.00     | 1.00       | 6.00    | 0.00       | 10.00         | 40.00      | 1.00 |
| 489.00  | 23.00 | 51.00  | 159.00 | 20.17 | 2.00  | 0.00      | 1.00      | 1.00           | 1.00    | 0.00         | 0.00   | 0.00   | 3.00         | 5.50       | 0.00   | 1.00          | 28.00     | 0.00       | 4.00    | 1.00       | 11.00         | 44.00      | 1.00 |
| 490.00  | 19.00 | 78.00  | 178.00 | 24.62 | 2.00  | 1.00      | 1.00      | 1.00           | 1.00    | 1.00         | 1.00   | 3.00   | 3.00         | 7.00       | 55.71  | 1.00          | 26.00     | 0.00       | 7.00    | 0.00       | 13.00         | 52.00      | 0.00 |
| 491.00  | 23.00 | 55.00  | 160.00 | 21.48 | 2.00  | 1.00      | 1.00      | 1.00           | 1.00    | 0.00         | 0.00   | 0.00   | 1.00         | 11.00      | 8.57   | 1.00          | 27.00     | 0.00       | 8.00    | 0.00       | 9.00          | 36.00      | 1.00 |
| 492.00  | 21.00 | 55.00  | 155.00 | 22.89 | 2.00  | 0.00      | 1.00      | 1.00           | 1.00    | 0.00         | 0.00   | 0.00   | 3.00         | 8.00       | 0.00   | 1.00          | 21.00     | 0.00       | 13.00   | 0.00       | 4.00          | 16.00      | 1.00 |
| 493.00  | 19.00 | 50.00  | 154.00 | 21.08 | 2.00  | 0.00      | 1.00      | 1.00           | 1.00    | 0.00         | 0.00   | 0.00   | 3.00         | 6.00       | 6.43   | 1.00          | 22.00     | 0.00       | 4.00    | 1.00       | 9.00          | 36.00      | 1.00 |
| 494.00  | 20.00 | 55.00  | 160.00 | 21.48 | 2.00  | 0.00      | 1.00      | 1.00           | 1.00    | 1.00         | 1.00   | 2.00   | 2.00         | 1.50       | 35.71  | 1.00          | 19.00     | 0.00       | 10.00   | 0.00       | 14.00         | 56.00      | 0.00 |
| 495.00  | 21.00 | 75.00  | 179.50 | 23.28 | 2.00  | 1.00      | 1.00      | 1.00           | 1.00    | 1.00         | 1.00   | 3.00   | 3.00         | 7.00       | 10.71  | 1.00          | 21.00     | 0.00       | 8.00    | 0.00       | 9.00          | 36.00      | 1.00 |
| 496.00  | 20.00 | 69.00  | 184.00 | 20.38 | 2.00  | 1.00      | 2.00      | 1.00           | 1.00    | 0.00         | 0.00   | 1.00   | 3.00         | 11.00      | 4.29   | 1.00          | 26.00     | 0.00       | 3.00    | 1.00       | 14.00         | 56.00      | 0.00 |
| 497.00  | 21.00 | 70.00  | 177.00 | 22.34 | 2.00  | 1.00      | 2.00      | 1.00           | 1.00    | 1.00         | 1.00   | 3.00   | 3.00         | 8.00       | 13.86  | 1.00          | 18.00     | 0.00       | 5.00    | 1.00       | 15.00         | 60.00      | 0.00 |
| 498.00  | 20.00 | 43.00  | 158.00 | 17.22 | 1.00  | 1.00      | 1.00      | 1.00           | 1.00    | 0.00         | 0.00   | 0.00   | 3.00         | 1.00       | 42.86  | 1.00          | 23.00     | 0.00       | 2.00    | 1.00       | 13.00         | 52.00      | 0.00 |
| 499.00  | 23.00 | 65.00  | 157.00 | 26.37 | 3.00  | 0.00      | 2.00      | 1.00           | 1.00    | 0.00         | 0.00   | 0.00   | 3.00         | 9.00       | 38.57  | 1.00          | 28.00     | 0.00       | 2.00    | 1.00       | 14.00         | 56.00      | 0.00 |
| 500.00  | 21.00 | 55.00  | 167.00 | 19.72 | 2.00  | 0.00      | 2.00      | 1.00           | 1.00    | 1.00         | 1.00   | 0.00   | 3.00         | 11.00      | 11.43  | 1.00          | 22.00     | 0.00       | 8.00    | 0.00       | 10.00         | 40.00      | 1.00 |
| 501.00  | 21.00 | 63.00  | 170.00 | 21.80 | 2.00  | 1.00      | 2.00      | 1.00           | 1.00    | 1.00         | 1.00   | 2.00   | 2.00         | 11.00      | 25.71  | 1.00          | 19.00     | 0.00       | 4.00    | 1.00       | 11.00         | 44.00      | 1.00 |
| 502.00  | 22.00 | 66.00  | 167.00 | 23.67 | 2.00  | 1.00      | 2.00      | 1.00           | 1.00    | 0.00         | 0.00   | 0.00   | 2.00         | 9.00       | 0.00   | 1.00          | 23.00     | 0.00       | 3.00    | 1.00       | 14.00         | 56.00      | 0.00 |
| 503.00  | 22.00 | 81.00  | 180.00 | 25.00 | 2.00  | 1.00      | 2.00      | 1.00           | 1.00    | 0.00         | 1.00   | 3.00   | 3.00         | 11.00      | 12.86  | 1.00          | 14.00     | 0.00       | 9.00    | 0.00       | 7.00          | 28.00      | 1.00 |
| 504.00  | 22.00 | 54.00  | 157.00 | 21.91 | 2.00  | 1.00      | 2.00      | 1.00           | 1.00    | 0.00         | 0.00   | 0.00   | 3.00         | 9.00       | 0.00   | 1.00          | 17.00     | 0.00       | 9.00    | 0.00       | 10.00         | 40.00      | 1.00 |
| 505.00  | 21.00 | 72.00  | 170.00 | 24.91 | 2.00  | 1.00      | 2.00      | 1.00           | 1.00    | 0.00         | 0.00   | 0.00   | 3.00         | 3.50       | 17.14  | 1.00          | 20.00     | 0.00       | 8.00    | 0.00       | 13.00         | 52.00      | 0.00 |
| 506.00  | 20.00 | 58.00  | 156.00 | 23.83 | 2.00  | 1.00      | 2.00      | 1.00           | 1.00    | 1.00         | 0.00   | 0.00   | 3.00         | 10.00      | 22.86  | 1.00          | 27.00     | 0.00       | 7.00    | 0.00       | 17.00         | 68.00      | 0.00 |
| 507.00  | 21.00 | 60.00  | 166.00 | 21.77 | 2.00  | 1.00      | 2.00      | 1.00           | 1.00    | 0.00         | 0.00   | 0.00   | 3.00         | 5.00       | 36.43  | 1.00          | 41.00     | 1.00       | 2.00    | 1.00       | 13.00         | 52.00      | 0.00 |
| 508.00  | 22.00 | 68.00  | 166.00 | 24.68 | 2.00  | 1.00      | 2.00      | 1.00           | 1.00    | 0.00         | 0.00   | 0.00   | 2.00         | 7.00       | 19.29  | 1.00          | 28.00     | 0.00       | 3.00    | 1.00       | 11.00         | 44.00      | 1.00 |
| 509.00  | 21.00 | 53.00  | 167.00 | 19.00 | 2.00  | 1.00      | 2.00      | 1.00           | 1.00    | 0.00         | 0.00   | 0.00   | 3.00         | 9.00       | 2.14   | 1.00          | 30.00     | 1.00       | 5.00    | 1.00       | 10.00         | 40.00      | 1.00 |
| 510.00  | 23.00 | 58.00  | 160.00 | 22.66 | 2.00  | 1.00      | 2.00      | 2.00           | 1.00    | 0.00         | 0.00   | 0.00   | 3.00         | 7.00       | 0.00   | 1.00          | 28.00     | 0.00       | 7.00    | 0.00       | 13.00         | 52.00      | 0.00 |
| 511.00  | 20.00 | 50.00  | 159.00 | 19.78 | 2.00  | 1.00      | 2.00      | 1.00           | 1.00    | 0.00         | 0.00   | 0.00   | 2.00         | 10.00      | 51.43  | 1.00          | 25.00     | 0.00       | 11.00   | 0.00       | 11.00         | 44.00      | 1.00 |
| 512.00  | 21.00 | 69.00  | 174.00 | 22.79 | 2.00  | 1.00      | 2.00      | 1.00           | 1.00    | 1.00         | 1.00   | 3.00   | 3.00         | 5.00       | 18.57  | 1.00          | 17.00     | 0.00       | 3.00    | 1.00       | 14.00         | 56.00      | 0.00 |
| 513.00  | 22.00 | 60.00  | 165.00 | 22.04 | 2.00  | 0.00      | 2.00      | 1.00           | 1.00    | 0.00         | 0.00   | 0.00   | 2.00         | 6.50       | 15.00  | 1.00          | 29.00     | 0.00       | 6.00    | 0.00       | 12.00         | 48.00      | 1.00 |
| 514.00  | 22.00 | 60.00  | 166.00 | 21.77 | 2.00  | 1.00      | 2.00      | 1.00           | 1.00    | 0.00         | 0.00   | 0.00   | 3.00         | 5.00       | 40.71  | 1.00          | 27.00     | 0.00       | 7.00    | 0.00       | 5.00          | 20.00      | 1.00 |
| 515.00  | 23.00 | 67.00  | 170.00 | 23.18 | 2.00  | 0.00      | 2.00      |                |         |              |        |        |              |            |        |               |           |            |         |            |               |            |      |



| Subject | Age   | Weight | Height | BMI   | BMI_C | Residence | Education | Marital_Status | Smoking | Chronic_Dise | Gender | Health | Sitting_Time | PA_Min_Day | IPAQ_C | Dietary_Score | Dietary_C | PSQI_Total | Sleep_C | WHO5_Total | WHO5_Total100 | WHO5_Class |
|---------|-------|--------|--------|-------|-------|-----------|-----------|----------------|---------|--------------|--------|--------|--------------|------------|--------|---------------|-----------|------------|---------|------------|---------------|------------|
| 529.00  | 18.00 | 90.00  | 170.00 | 31.14 | 4.00  | 0.00      | 2.00      | 1.00           | 0.00    | 0.00         | 1.00   | 3.00   | 7.00         | 38.57      | 1.00   | 36.00         | 1.00      | 1.00       | 1.00    | 15.00      | 60.00         | 0.00       |
| 530.00  | 20.00 | 100.00 | 178.00 | 31.56 | 4.00  | 1.00      | 2.00      | 1.00           | 0.00    | 0.00         | 1.00   | 3.00   | 8.00         | 25.71      | 1.00   | 22.00         | 0.00      | 6.00       | 0.00    | 13.00      | 52.00         | 0.00       |
| 531.00  | 21.00 | 116.00 | 190.00 | 32.13 | 4.00  | 1.00      | 2.00      | 1.00           | 0.00    | 0.00         | 1.00   | 3.00   | 7.00         | 11.43      | 1.00   | 24.00         | 0.00      | 3.00       | 1.00    | 17.00      | 68.00         | 0.00       |
| 532.00  | 19.00 | 120.00 | 185.00 | 35.06 | 4.00  | 0.00      | 2.00      | 1.00           | 0.00    | 1.00         | 1.00   | 2.00   | 11.00        | 0.00       | 1.00   | 15.00         | 0.00      | 9.00       | 0.00    | 6.00       | 24.00         | 1.00       |
| 533.00  | 22.00 | 65.00  | 160.00 | 25.39 | 3.00  | 1.00      | 1.00      | 2.00           | 0.00    | 0.00         | 0.00   | 1.00   | 6.00         | 4.29       | 1.00   | 27.00         | 0.00      | 4.00       | 1.00    | 19.00      | 76.00         | 0.00       |
| 534.00  | 19.00 | 70.00  | 164.00 | 26.03 | 3.00  | 0.00      | 1.00      | 1.00           | 0.00    | 0.00         | 0.00   | 2.00   | 5.00         | 49.29      | 1.00   | 21.00         | 0.00      | 4.00       | 1.00    | 2.00       | 8.00          | 1.00       |
| 535.00  | 18.00 | 85.00  | 175.00 | 27.76 | 3.00  | 1.00      | 1.00      | 1.00           | 0.00    | 0.00         | 0.00   | 2.00   | 7.00         | 0.00       | 1.00   | 25.00         | 0.00      | 11.00      | 0.00    | 9.00       | 36.00         | 1.00       |
| 536.00  | 22.00 | 90.00  | 185.00 | 26.30 | 3.00  | 1.00      | 1.00      | 1.00           | 1.00    | 0.00         | 1.00   | 2.00   | 9.00         | 5.71       | 1.00   | 33.00         | 1.00      | 2.00       | 1.00    | 13.00      | 52.00         | 0.00       |
| 537.00  | 19.00 | 68.00  | 160.00 | 26.56 | 3.00  | 0.00      | 1.00      | 1.00           | 1.00    | 0.00         | 0.00   | 2.00   | 5.50         | 1.43       | 1.00   | 28.00         | 0.00      | 2.00       | 1.00    | 14.00      | 56.00         | 0.00       |
| 538.00  | 19.00 | 80.00  | 170.00 | 27.68 | 3.00  | 1.00      | 1.00      | 1.00           | 0.00    | 0.00         | 0.00   | 2.00   | 7.00         | 45.00      | 1.00   | 33.00         | 1.00      | 4.00       | 1.00    | 13.00      | 52.00         | 0.00       |
| 539.00  | 21.00 | 68.00  | 160.00 | 26.56 | 3.00  | 1.00      | 1.00      | 1.00           | 0.00    | 0.00         | 0.00   | 2.00   | 5.00         | 56.86      | 1.00   | 31.00         | 1.00      | 3.00       | 1.00    | 14.00      | 56.00         | 0.00       |
| 540.00  | 20.00 | 75.00  | 169.00 | 26.26 | 3.00  | 1.00      | 1.00      | 1.00           | 0.00    | 0.00         | 1.00   | 3.00   | 12.00        | 25.71      | 1.00   | 26.00         | 0.00      | 9.00       | 0.00    | 5.00       | 20.00         | 1.00       |
| 541.00  | 21.00 | 102.00 | 186.00 | 29.48 | 3.00  | 1.00      | 1.00      | 1.00           | 0.00    | 0.00         | 1.00   | 3.00   | 7.00         | 43.57      | 1.00   | 24.00         | 0.00      | 6.00       | 0.00    | 10.00      | 40.00         | 1.00       |
| 542.00  | 20.00 | 76.00  | 160.00 | 29.69 | 3.00  | 1.00      | 1.00      | 1.00           | 0.00    | 0.00         | 0.00   | 3.00   | 5.00         | 37.14      | 1.00   | 19.00         | 0.00      | 9.00       | 0.00    | 10.00      | 40.00         | 1.00       |
| 543.00  | 22.00 | 61.00  | 155.00 | 25.39 | 3.00  | 1.00      | 1.00      | 1.00           | 0.00    | 0.00         | 1.00   | 3.00   | 8.00         | 25.71      | 1.00   | 21.00         | 0.00      | 4.00       | 1.00    | 8.00       | 32.00         | 1.00       |
| 544.00  | 23.00 | 100.00 | 183.00 | 29.86 | 3.00  | 0.00      | 1.00      | 1.00           | 0.00    | 0.00         | 1.00   | 3.00   | 6.00         | 4.29       | 1.00   | 29.00         | 0.00      | 12.00      | 0.00    | 11.00      | 44.00         | 1.00       |
| 545.00  | 23.00 | 95.00  | 182.00 | 28.68 | 3.00  | 1.00      | 1.00      | 1.00           | 0.00    | 0.00         | 1.00   | 3.00   | 7.00         | 8.57       | 1.00   | 34.00         | 1.00      | 3.00       | 1.00    | 15.00      | 60.00         | 0.00       |
| 546.00  | 21.00 | 83.00  | 173.00 | 27.73 | 3.00  | 1.00      | 1.00      | 1.00           | 0.00    | 0.00         | 1.00   | 3.00   | 5.00         | 20.00      | 1.00   | 24.00         | 0.00      | 5.00       | 1.00    | 14.00      | 56.00         | 0.00       |
| 547.00  | 22.00 | 68.00  | 160.00 | 26.56 | 3.00  | 1.00      | 1.00      | 1.00           | 0.00    | 0.00         | 0.00   | 3.00   | 6.50         | 30.00      | 1.00   | 20.00         | 0.00      | 4.00       | 1.00    | 9.00       | 36.00         | 1.00       |
| 548.00  | 23.00 | 83.00  | 173.00 | 27.73 | 3.00  | 1.00      | 1.00      | 1.00           | 0.00    | 0.00         | 1.00   | 3.00   | 8.00         | 30.00      | 1.00   | 23.00         | 0.00      | 6.00       | 0.00    | 9.00       | 36.00         | 1.00       |
| 549.00  | 18.00 | 65.00  | 153.00 | 27.77 | 3.00  | 1.00      | 1.00      | 1.00           | 0.00    | 0.00         | 0.00   | 3.00   | 6.00         | 14.29      | 1.00   | 27.00         | 0.00      | 5.00       | 1.00    | 15.00      | 60.00         | 0.00       |
| 550.00  | 22.00 | 70.00  | 159.00 | 27.69 | 3.00  | 0.00      | 1.00      | 1.00           | 0.00    | 0.00         | 0.00   | 3.00   | 10.00        | 8.57       | 1.00   | 36.00         | 1.00      | 2.00       | 1.00    | 15.00      | 60.00         | 0.00       |
| 551.00  | 22.00 | 75.00  | 168.00 | 26.57 | 3.00  | 1.00      | 1.00      | 1.00           | 1.00    | 1.00         | 1.00   | 2.00   | 6.50         | 12.86      | 1.00   | 26.00         | 0.00      | 8.00       | 0.00    | 5.00       | 20.00         | 1.00       |
| 552.00  | 19.00 | 66.00  | 160.00 | 25.78 | 3.00  | 1.00      | 1.00      | 1.00           | 1.00    | 1.00         | 1.00   | 2.00   | 6.00         | 0.00       | 1.00   | 24.00         | 0.00      | 6.00       | 0.00    | 12.00      | 48.00         | 1.00       |
| 553.00  | 22.00 | 82.00  | 167.00 | 29.40 | 3.00  | 0.00      | 1.00      | 1.00           | 1.00    | 1.00         | 1.00   | 2.00   | 10.00        | 25.71      | 1.00   | 20.00         | 0.00      | 13.00      | 0.00    | 14.00      | 56.00         | 0.00       |
| 554.00  | 21.00 | 75.00  | 164.00 | 27.89 | 3.00  | 0.00      | 1.00      | 1.00           | 0.00    | 1.00         | 0.00   | 3.00   | 8.00         | 34.29      | 1.00   | 33.00         | 1.00      | 11.00      | 0.00    | 5.00       | 20.00         | 1.00       |
| 555.00  | 21.00 | 59.00  | 152.00 | 25.54 | 3.00  | 0.00      | 1.00      | 1.00           | 0.00    | 1.00         | 0.00   | 3.00   | 9.00         | 50.00      | 1.00   | 29.00         | 0.00      | 4.00       | 1.00    | 16.00      | 64.00         | 0.00       |
| 556.00  | 22.00 | 70.00  | 160.00 | 27.34 | 3.00  | 0.00      | 2.00      | 1.00           | 0.00    | 0.00         | 0.00   | 1.00   | 7.00         | 8.57       | 1.00   | 25.00         | 0.00      | 7.00       | 0.00    | 9.00       | 36.00         | 1.00       |
| 557.00  | 23.00 | 80.00  | 176.00 | 25.83 | 3.00  | 1.00      | 2.00      | 1.00           | 1.00    | 0.00         | 1.00   | 2.00   | 8.00         | 4.29       | 1.00   | 25.00         | 0.00      | 6.00       | 0.00    | 4.00       | 16.00         | 1.00       |
| 558.00  | 21.00 | 68.00  | 160.00 | 26.56 | 3.00  | 1.00      | 2.00      | 2.00           | 0.00    | 0.00         | 0.00   | 2.00   | 6.50         | 60.71      | 1.00   | 28.00         | 0.00      | 3.00       | 1.00    | 15.00      | 60.00         | 0.00       |
| 559.00  | 20.00 | 84.00  | 170.00 | 29.07 | 3.00  | 1.00      | 2.00      | 1.00           | 1.00    | 0.00         | 1.00   | 2.00   | 3.00         | 25.71      | 1.00   | 42.00         | 1.00      | 4.00       | 1.00    | 14.00      | 56.00         | 0.00       |
| 560.00  | 21.00 | 69.00  | 160.00 | 26.95 | 3.00  | 0.00      | 2.00      | 1.00           | 0.00    | 0.00         | 0.00   | 2.00   | 2.50         | 0.00       | 1.00   | 24.00         | 0.00      | 3.00       | 1.00    | 14.00      | 56.00         | 0.00       |
| 561.00  | 20.00 | 83.00  | 178.00 | 26.20 | 3.00  | 1.00      | 2.00      | 1.00           | 0.00    | 0.00         | 1.00   | 2.00   | 10.00        | 25.71      | 1.00   | 25.00         | 0.00      | 1.00       | 1.00    | 14.00      | 56.00         | 0.00       |
| 562.00  | 18.00 | 60.00  | 152.00 | 25.97 | 3.00  | 1.00      | 2.00      | 1.00           | 0.00    | 0.00         | 0.00   | 3.00   | 11.00        | 17.14      | 1.00   | 25.00         | 0.00      | 7.00       | 0.00    | 5.00       | 20.00         | 1.00       |
| 563.00  | 21.00 | 94.00  | 192.00 | 25.50 | 3.00  | 1.00      | 2.00      | 1.00           | 0.00    | 0.00         | 1.00   | 3.00   | 1.00         | 12.86      | 1.00   | 26.00         | 0.00      | 6.00       | 0.00    | 11.00      | 44.00         | 1.00       |
| 564.00  | 21.00 | 71.00  | 167.00 | 25.46 | 3.00  | 1.00      | 2.00      | 1.00           | 1.00    | 0.00         | 0.00   | 3.00   | 5.00         | 17.14      | 1.00   | 23.00         | 0.00      | 7.00       | 0.00    | 9.00       | 36.00         | 1.00       |
| 565.00  | 20.00 | 70.00  | 165.00 | 25.71 | 3.00  | 0.00      | 2.00      | 1.00           | 0.00    | 0.00         | 1.00   | 3.00   | 5.00         | 42.86      | 1.00   | 32.00         | 1.00      | 6.00       | 0.00    | 15.00      | 60.00         | 0.00       |
| 566.00  | 21.00 | 80.00  | 173.00 | 26.73 | 3.00  | 0.00      | 2.00      | 1.00           | 0.00    | 0.00         | 0.00   | 3.00   | 11.00        | 0.00       | 1.00   | 29.00         | 0.00      | 3.00       | 1.00    | 17.00      | 68.00         | 0.00       |
| 567.00  | 19.00 | 78.00  | 173.00 | 26.06 | 3.00  | 1.00      | 2.00      | 1.00           | 0.00    | 0.00         | 1.00   | 3.00   | 6.50         | 25.71      | 1.00   | 22.00         | 0.00      | 4.00       | 1.00    | 15.00      | 60.00         | 0.00       |
| 568.00  | 20.00 | 68.00  | 157.00 | 27.59 | 3.00  | 1.00      | 2.00      | 1.00           | 1.00    | 0.00         | 0.00   | 3.00   | 5.00         | 0.00       | 1.00   | 16.00         | 0.00      | 3.00       | 1.00    | 11.00      | 44.00         | 1.00       |
| 569.00  | 19.00 | 65.00  | 158.00 | 26.04 | 3.00  | 1.00      | 2.00      | 1.00           | 0.00    | 1.00         | 0.00   | 2.00   | 8.00         | 2.14       | 1.00   | 15.00         | 0.00      | 7.00       | 0.00    | 13.00      | 52.00         | 0.00       |
| 570.00  | 20.00 | 70.00  | 158.00 | 28.04 | 3.00  | 0.00      | 2.00      | 1.00           | 0.00    | 1.00         | 0.00   | 3.00   | 11.00        | 40.71      | 1.00   | 32.00         | 1.00      | 6.00       | 0.00    | 5.00       | 20.00         | 1.00       |
| 571.00  | 23.00 | 79.00  | 169.00 | 27.66 | 3.00  | 0.00      | 2.00      | 1.00           | 1.00    | 1.00         | 1.00   | 3.00   | 7.00         | 45.71      | 1.00   | 18.00         | 0.00      | 8.00       | 0.00    | 7.00       | 28.00         | 1.00       |
| 572.00  | 18.00 | 52.00  | 150.00 | 23.11 | 2.00  | 1.00      | 1.00      | 1.00           | 0.00    | 0.00         | 0.00   | 2.00   | 11.00        | 13.86      | 1.00   | 26.00         | 0.00      | 4.00       | 1.00    | 12.00      | 48.00         | 1.00       |
| 573.00  | 18.00 | 58.00  | 164.00 | 21.56 | 2.00  | 1.00      | 1.00      | 1.00           | 1.00    | 0.00         | 0.00   | 3.00   | 7.00         | 8.57       | 1.00   | 17.00         | 0.00      | 5.00       | 1.00    | 16.00      | 64.00         | 0.00       |
| 574.00  | 19.00 | 57.00  | 169.00 | 19.96 | 2.00  | 0.00      | 1.00      | 1.00           | 0.00    | 0.00         | 1.00   | 3.00   | 4.00         | 32.14      | 1.00   | 27.00         | 0.00      | 4.00       | 1.00    | 14.00      | 56.00         | 0.00       |
| 575.00  | 22.00 | 64.00  | 168.00 | 22.68 | 2.00  | 1.00      | 1.00      | 1.00           | 0.00    | 0.00         | 0.00   | 1.00   | 7.00         | 38.57      | 1.00   | 33.00         | 1.00      | 4.00       | 1.00    | 15.00      | 60.00         | 0.00       |
| 576.00  | 23.00 | 70.00  | 170.00 | 24.22 | 2.00  | 1.00      | 1.00      | 1.00           | 0.00    | 0.00         | 0.00   | 1.00   | 7.00         | 0.00       | 1.00   | 25.00         | 0.00      | 7.00       | 0.00    | 9.00       | 36.00         | 1.00       |
| 577.00  | 20.00 | 60.00  | 170.00 | 20.76 | 2.00  | 1.00      | 1.00      | 1.00           | 0.00    | 0.00         | 0.00   | 2.00   | 11.00        | 0.00       | 1.00   | 29.00         | 0.00      | 5.00       | 1.00    | 3.00       | 12.00         | 1.00       |
| 578.00  | 22.00 | 59.00  | 168.00 | 20.90 | 2.00  | 1.00      | 1.00      | 1.00           | 0.00    | 0.00         | 0.00   | 2.00   | 5.00         | 4.29       | 1.00   | 22.00         | 0.00      | 13.00      | 0.00    | 11.00      | 44.00         | 1.00       |
| 579.00  | 22.00 | 61.00  | 162.00 | 23.24 | 2.00  | 1.00      | 1.00      | 1.00           | 0.00    | 0.00         | 0.00   | 2.00   | 7.00         | 30.00      | 1.00   | 32.00         | 1.00      | 5.00       | 1.00    | 11.00      | 44.00         | 1.00       |
| 580.00  | 22.00 | 52.00  | 154.00 | 21.93 | 2.00  | 1.00      | 1.00      | 2.00           | 0.00    | 0.00         | 0.00   | 2.00   | 4.00         | 21.43      | 1.00   | 32.00         | 1.00      | 6.00       | 0.00    | 11.00      | 44.00         | 1.00       |
| 581.00  | 19.00 | 54.00  | 165.00 | 19.83 | 2.00  | 1.00      | 1.00      | 1.00           | 0.00    | 0.00         | 0.00   | 2.00   | 9.00         | 19.29      | 1.00   | 25.00         | 0.00      | 6.00       | 0.00    | 11.00      | 44.00         | 1.00       |
| 582.00  | 20.00 | 53.00  | 160.00 | 20.70 | 2.00  | 0.00      | 1.00      | 1.00           | 0.00    | 0.00         | 0.00   | 2.00   | 7.00         | 0.00       | 1.00   | 17.00         | 0.00      | 4.00       | 1.00    | 14.00      | 56.00         | 0.00       |
| 583.00  | 20.00 | 59.00  | 167.00 | 21.16 | 2.00  | 1.00      | 1.00      | 1.00           | 0.00    | 0.00         | 0.00</ |        |              |            |        |               |           |            |         |            |               |            |

| Subject | Age   | Weight | Height | BMI   | BMI_C | Residence | Education | Marital_Status | Smoking | Chronic_Dise | Gender | Health | Sitting_Time | PA_Min_Day | IPAQ_C | Dietary_Score | Dietary_C | PSQI_Total | Sleep_C | WHO5_Total | WHO5_Total100 | WHO5_Class |      |
|---------|-------|--------|--------|-------|-------|-----------|-----------|----------------|---------|--------------|--------|--------|--------------|------------|--------|---------------|-----------|------------|---------|------------|---------------|------------|------|
| 595.00  | 20.00 | 57.00  | 167.00 | 20.44 | 2.00  | 1.00      | 1.00      | 1.00           | 1.00    | 0.00         | 0.00   | 0.00   | 3.00         | 11.00      | 12.86  | 1.00          | 32.00     | 1.00       | 4.00    | 1.00       | 10.00         | 40.00      | 1.00 |
| 596.00  | 20.00 | 71.00  | 183.00 | 21.20 | 2.00  | 0.00      | 1.00      | 1.00           | 0.00    | 0.00         | 1.00   | 3.00   | 12.00        | 28.57      | 1.00   | 30.00         | 1.00      | 12.00      | 0.00    | 15.00      | 60.00         | 0.00       |      |
| 597.00  | 21.00 | 55.00  | 164.00 | 20.45 | 2.00  | 1.00      | 1.00      | 1.00           | 0.00    | 0.00         | 0.00   | 3.00   | 3.00         | 24.29      | 1.00   | 34.00         | 1.00      | 11.00      | 0.00    | 13.00      | 52.00         | 0.00       |      |
| 598.00  | 23.00 | 53.00  | 167.00 | 19.00 | 2.00  | 1.00      | 1.00      | 1.00           | 0.00    | 0.00         | 1.00   | 3.00   | 8.00         | 21.43      | 1.00   | 19.00         | 0.00      | 8.00       | 0.00    | 10.00      | 40.00         | 1.00       |      |
| 599.00  | 19.00 | 60.00  | 170.00 | 20.76 | 2.00  | 1.00      | 1.00      | 1.00           | 0.00    | 0.00         | 1.00   | 3.00   | 4.50         | 10.71      | 1.00   | 26.00         | 0.00      | 5.00       | 1.00    | 9.00       | 36.00         | 1.00       |      |
| 600.00  | 22.00 | 56.00  | 169.00 | 19.61 | 2.00  | 0.00      | 1.00      | 1.00           | 0.00    | 0.00         | 0.00   | 3.00   | 4.00         | 0.00       | 1.00   | 28.00         | 0.00      | 5.00       | 1.00    | 15.00      | 60.00         | 0.00       |      |
| 601.00  | 18.00 | 57.00  | 155.00 | 23.73 | 2.00  | 1.00      | 1.00      | 1.00           | 0.00    | 0.00         | 0.00   | 3.00   | 7.00         | 8.57       | 1.00   | 32.00         | 1.00      | 5.00       | 1.00    | 16.00      | 64.00         | 0.00       |      |
| 602.00  | 21.00 | 60.00  | 170.00 | 20.76 | 2.00  | 1.00      | 1.00      | 1.00           | 0.00    | 0.00         | 1.00   | 3.00   | 1.50         | 31.43      | 1.00   | 26.00         | 0.00      | 5.00       | 1.00    | 15.00      | 60.00         | 0.00       |      |
| 603.00  | 21.00 | 60.00  | 170.00 | 20.76 | 2.00  | 1.00      | 1.00      | 1.00           | 0.00    | 0.00         | 0.00   | 3.00   | 7.00         | 0.00       | 1.00   | 25.00         | 0.00      | 7.00       | 0.00    | 10.00      | 40.00         | 1.00       |      |
| 604.00  | 19.00 | 58.00  | 167.00 | 20.80 | 2.00  | 1.00      | 1.00      | 2.00           | 0.00    | 0.00         | 0.00   | 3.00   | 6.00         | 0.00       | 1.00   | 24.00         | 0.00      | 4.00       | 1.00    | 17.00      | 68.00         | 0.00       |      |
| 605.00  | 20.00 | 56.00  | 160.00 | 21.88 | 2.00  | 1.00      | 1.00      | 1.00           | 0.00    | 0.00         | 0.00   | 3.00   | 10.00        | 4.29       | 1.00   | 26.00         | 0.00      | 6.00       | 0.00    | 10.00      | 40.00         | 1.00       |      |
| 606.00  | 18.00 | 53.00  | 159.00 | 20.96 | 2.00  | 1.00      | 1.00      | 1.00           | 0.00    | 0.00         | 0.00   | 3.00   | 7.00         | 17.14      | 1.00   | 23.00         | 0.00      | 5.00       | 1.00    | 12.00      | 48.00         | 1.00       |      |
| 607.00  | 19.00 | 62.00  | 162.00 | 23.62 | 2.00  | 0.00      | 1.00      | 1.00           | 0.00    | 0.00         | 0.00   | 3.00   | 3.00         | 30.00      | 1.00   | 32.00         | 1.00      | 4.00       | 1.00    | 12.00      | 48.00         | 1.00       |      |
| 608.00  | 20.00 | 61.00  | 165.00 | 22.41 | 2.00  | 1.00      | 1.00      | 1.00           | 0.00    | 0.00         | 0.00   | 3.00   | 4.00         | 8.57       | 1.00   | 28.00         | 0.00      | 3.00       | 1.00    | 15.00      | 60.00         | 0.00       |      |
| 609.00  | 21.00 | 65.00  | 175.00 | 21.22 | 2.00  | 1.00      | 1.00      | 2.00           | 0.00    | 0.00         | 0.00   | 3.00   | 7.00         | 37.14      | 1.00   | 31.00         | 1.00      | 1.00       | 1.00    | 15.00      | 60.00         | 0.00       |      |
| 610.00  | 21.00 | 50.00  | 155.00 | 20.81 | 2.00  | 0.00      | 1.00      | 1.00           | 0.00    | 0.00         | 0.00   | 3.00   | 4.00         | 7.86       | 1.00   | 38.00         | 1.00      | 4.00       | 1.00    | 17.00      | 68.00         | 0.00       |      |
| 611.00  | 20.00 | 65.00  | 176.00 | 20.98 | 2.00  | 0.00      | 1.00      | 1.00           | 0.00    | 0.00         | 1.00   | 3.00   | 1.50         | 4.29       | 1.00   | 31.00         | 1.00      | 6.00       | 0.00    | 17.00      | 68.00         | 0.00       |      |
| 612.00  | 21.00 | 75.00  | 176.00 | 24.21 | 2.00  | 1.00      | 1.00      | 1.00           | 0.00    | 0.00         | 1.00   | 3.00   | 4.50         | 36.43      | 1.00   | 33.00         | 1.00      | 8.00       | 0.00    | 16.00      | 64.00         | 0.00       |      |
| 613.00  | 23.00 | 53.00  | 153.00 | 22.64 | 2.00  | 1.00      | 1.00      | 2.00           | 0.00    | 0.00         | 0.00   | 3.00   | 6.00         | 0.00       | 1.00   | 34.00         | 1.00      | 6.00       | 0.00    | 13.00      | 52.00         | 0.00       |      |
| 614.00  | 22.00 | 53.00  | 159.00 | 20.96 | 2.00  | 0.00      | 1.00      | 1.00           | 0.00    | 0.00         | 0.00   | 3.00   | 9.00         | 32.86      | 1.00   | 28.00         | 0.00      | 5.00       | 1.00    | 11.00      | 44.00         | 1.00       |      |
| 615.00  | 18.00 | 54.00  | 164.00 | 20.08 | 2.00  | 1.00      | 1.00      | 1.00           | 0.00    | 0.00         | 0.00   | 3.00   | 4.00         | 32.86      | 1.00   | 31.00         | 1.00      | 4.00       | 1.00    | 16.00      | 64.00         | 0.00       |      |
| 616.00  | 22.00 | 55.00  | 160.00 | 21.48 | 2.00  | 1.00      | 1.00      | 1.00           | 0.00    | 0.00         | 0.00   | 3.00   | 8.00         | 25.71      | 1.00   | 27.00         | 0.00      | 3.00       | 1.00    | 16.00      | 64.00         | 0.00       |      |
| 617.00  | 22.00 | 50.00  | 150.00 | 22.22 | 2.00  | 1.00      | 1.00      | 2.00           | 0.00    | 0.00         | 0.00   | 3.00   | 5.50         | 7.14       | 1.00   | 24.00         | 0.00      | 4.00       | 1.00    | 13.00      | 52.00         | 0.00       |      |
| 618.00  | 23.00 | 70.00  | 172.00 | 23.66 | 2.00  | 0.00      | 1.00      | 1.00           | 0.00    | 0.00         | 1.00   | 3.00   | 10.00        | 25.71      | 1.00   | 28.00         | 0.00      | 0.00       | 1.00    | 17.00      | 68.00         | 0.00       |      |
| 619.00  | 18.00 | 52.00  | 157.00 | 21.10 | 2.00  | 1.00      | 1.00      | 1.00           | 0.00    | 0.00         | 0.00   | 3.00   | 3.50         | 0.00       | 1.00   | 32.00         | 1.00      | 3.00       | 1.00    | 17.00      | 68.00         | 0.00       |      |
| 620.00  | 22.00 | 48.00  | 158.00 | 19.23 | 2.00  | 1.00      | 1.00      | 1.00           | 0.00    | 1.00         | 0.00   | 1.00   | 9.00         | 15.00      | 1.00   | 8.00          | 0.00      | 6.00       | 0.00    | 10.00      | 40.00         | 1.00       |      |
| 621.00  | 19.00 | 76.00  | 175.00 | 24.82 | 2.00  | 0.00      | 1.00      | 1.00           | 1.00    | 1.00         | 1.00   | 1.00   | 4.50         | 8.57       | 1.00   | 31.00         | 1.00      | 1.00       | 1.00    | 16.00      | 64.00         | 0.00       |      |
| 622.00  | 21.00 | 56.00  | 162.00 | 21.34 | 2.00  | 1.00      | 1.00      | 1.00           | 0.00    | 1.00         | 0.00   | 2.00   | 9.00         | 38.57      | 1.00   | 27.00         | 0.00      | 6.00       | 0.00    | 6.00       | 24.00         | 1.00       |      |
| 623.00  | 21.00 | 62.00  | 167.00 | 22.23 | 2.00  | 0.00      | 1.00      | 1.00           | 1.00    | 1.00         | 1.00   | 2.00   | 10.00        | 0.00       | 1.00   | 23.00         | 0.00      | 7.00       | 0.00    | 9.00       | 36.00         | 1.00       |      |
| 624.00  | 20.00 | 49.00  | 155.00 | 20.40 | 2.00  | 1.00      | 1.00      | 1.00           | 1.00    | 1.00         | 0.00   | 2.00   | 10.00        | 12.86      | 1.00   | 23.00         | 0.00      | 10.00      | 0.00    | 9.00       | 36.00         | 1.00       |      |
| 625.00  | 23.00 | 65.00  | 163.00 | 24.46 | 2.00  | 1.00      | 1.00      | 1.00           | 0.00    | 1.00         | 0.00   | 2.00   | 11.00        | 9.00       | 1.00   | 24.00         | 0.00      | 3.00       | 1.00    | 10.00      | 40.00         | 1.00       |      |
| 626.00  | 19.00 | 58.00  | 175.00 | 18.94 | 2.00  | 1.00      | 1.00      | 1.00           | 1.00    | 1.00         | 1.00   | 2.00   | 5.50         | 0.00       | 1.00   | 19.00         | 0.00      | 5.00       | 1.00    | 9.00       | 36.00         | 1.00       |      |
| 627.00  | 23.00 | 70.00  | 169.00 | 24.51 | 2.00  | 1.00      | 1.00      | 1.00           | 1.00    | 1.00         | 1.00   | 2.00   | 8.00         | 41.43      | 1.00   | 26.00         | 0.00      | 8.00       | 0.00    | 11.00      | 44.00         | 1.00       |      |
| 628.00  | 22.00 | 60.00  | 173.00 | 20.05 | 2.00  | 1.00      | 1.00      | 1.00           | 1.00    | 1.00         | 1.00   | 2.00   | 8.00         | 47.14      | 1.00   | 33.00         | 1.00      | 7.00       | 0.00    | 12.00      | 48.00         | 1.00       |      |
| 629.00  | 20.00 | 60.00  | 172.00 | 20.28 | 2.00  | 1.00      | 1.00      | 1.00           | 1.00    | 1.00         | 1.00   | 2.00   | 11.00        | 32.14      | 1.00   | 24.00         | 0.00      | 3.00       | 1.00    | 14.00      | 56.00         | 0.00       |      |
| 630.00  | 20.00 | 54.00  | 158.00 | 21.63 | 2.00  | 0.00      | 1.00      | 1.00           | 1.00    | 1.00         | 0.00   | 2.00   | 6.50         | 17.14      | 1.00   | 16.00         | 0.00      | 8.00       | 0.00    | 16.00      | 64.00         | 0.00       |      |
| 631.00  | 22.00 | 75.00  | 182.00 | 22.64 | 2.00  | 1.00      | 1.00      | 1.00           | 1.00    | 1.00         | 1.00   | 2.00   | 6.00         | 38.57      | 1.00   | 34.00         | 1.00      | 1.00       | 1.00    | 15.00      | 60.00         | 0.00       |      |
| 632.00  | 21.00 | 65.00  | 164.00 | 24.17 | 2.00  | 1.00      | 1.00      | 1.00           | 0.00    | 1.00         | 0.00   | 3.00   | 11.00        | 25.71      | 1.00   | 18.00         | 0.00      | 6.00       | 0.00    | 10.00      | 40.00         | 1.00       |      |
| 633.00  | 20.00 | 46.00  | 157.00 | 18.66 | 2.00  | 0.00      | 1.00      | 1.00           | 0.00    | 1.00         | 0.00   | 3.00   | 6.00         | 10.71      | 1.00   | 25.00         | 0.00      | 13.00      | 0.00    | 12.00      | 48.00         | 1.00       |      |
| 634.00  | 21.00 | 64.00  | 168.00 | 22.68 | 2.00  | 0.00      | 1.00      | 1.00           | 0.00    | 1.00         | 0.00   | 3.00   | 6.00         | 34.29      | 1.00   | 28.00         | 0.00      | 5.00       | 1.00    | 17.00      | 68.00         | 0.00       |      |
| 635.00  | 19.00 | 61.00  | 163.00 | 22.96 | 2.00  | 1.00      | 1.00      | 1.00           | 1.00    | 1.00         | 0.00   | 3.00   | 5.00         | 8.57       | 1.00   | 31.00         | 1.00      | 2.00       | 1.00    | 16.00      | 64.00         | 0.00       |      |
| 636.00  | 23.00 | 64.00  | 160.00 | 25.00 | 2.00  | 1.00      | 2.00      | 1.00           | 1.00    | 0.00         | 1.00   | 1.00   | 3.00         | 34.29      | 1.00   | 21.00         | 0.00      | 4.00       | 1.00    | 10.00      | 40.00         | 1.00       |      |
| 637.00  | 18.00 | 58.00  | 158.00 | 23.23 | 2.00  | 1.00      | 2.00      | 1.00           | 1.00    | 0.00         | 0.00   | 1.00   | 11.00        | 14.29      | 1.00   | 25.00         | 0.00      | 5.00       | 1.00    | 19.00      | 76.00         | 0.00       |      |
| 638.00  | 21.00 | 60.00  | 165.00 | 22.04 | 2.00  | 1.00      | 2.00      | 2.00           | 0.00    | 0.00         | 0.00   | 2.00   | 7.00         | 25.71      | 1.00   | 20.00         | 0.00      | 6.00       | 0.00    | 5.00       | 20.00         | 1.00       |      |
| 639.00  | 20.00 | 55.00  | 160.00 | 21.48 | 2.00  | 1.00      | 2.00      | 1.00           | 0.00    | 0.00         | 0.00   | 2.00   | 9.00         | 28.57      | 1.00   | 21.00         | 0.00      | 5.00       | 1.00    | 12.00      | 48.00         | 1.00       |      |
| 640.00  | 18.00 | 59.00  | 156.00 | 24.24 | 2.00  | 1.00      | 2.00      | 1.00           | 0.00    | 0.00         | 1.00   | 3.00   | 9.00         | 2.86       | 1.00   | 21.00         | 0.00      | 4.00       | 1.00    | 12.00      | 48.00         | 1.00       |      |
| 641.00  | 21.00 | 55.00  | 162.50 | 20.83 | 2.00  | 1.00      | 2.00      | 1.00           | 0.00    | 0.00         | 0.00   | 3.00   | 8.00         | 32.14      | 1.00   | 33.00         | 1.00      | 7.00       | 0.00    | 13.00      | 52.00         | 0.00       |      |
| 642.00  | 19.00 | 62.00  | 165.00 | 22.77 | 2.00  | 0.00      | 2.00      | 1.00           | 0.00    | 0.00         | 0.00   | 3.00   | 10.00        | 14.29      | 1.00   | 35.00         | 1.00      | 6.00       | 0.00    | 13.00      | 52.00         | 0.00       |      |
| 643.00  | 23.00 | 55.00  | 170.00 | 19.03 | 2.00  | 1.00      | 2.00      | 1.00           | 0.00    | 0.00         | 0.00   | 3.00   | 7.00         | 4.29       | 1.00   | 27.00         | 0.00      | 2.00       | 1.00    | 14.00      | 56.00         | 0.00       |      |
| 644.00  | 19.00 | 47.50  | 160.00 | 18.55 | 2.00  | 1.00      | 2.00      | 2.00           | 0.00    | 0.00         | 0.00   | 3.00   | 10.00        | 14.29      | 1.00   | 30.00         | 1.00      | 4.00       | 1.00    | 19.00      | 76.00         | 0.00       |      |
| 645.00  | 20.00 | 66.00  | 170.00 | 22.84 | 2.00  | 1.00      | 2.00      | 1.00           | 0.00    | 0.00         | 0.00   | 3.00   | 1.00         | 8.57       | 1.00   | 23.00         | 0.00      | 1.00       | 1.00    | 13.00      | 52.00         | 0.00       |      |
| 646.00  | 19.00 | 51.00  | 164.00 | 18.96 | 2.00  | 0.00      | 2.00      | 1.00           | 0.00    | 1.00         | 0.00   | 1.00   | 6.50         | 22.86      | 1.00   | 26.00         | 0.00      | 7.00       | 0.00    | 5.00       | 20.00         | 1.00       |      |
| 647.00  | 20.00 | 50.00  | 161.00 | 19.29 | 2.00  | 0.00      | 2.00      | 1.00           | 0.00    | 0.00         | 0.00   | 1.00   | 11.00        | 2.14       | 1.00   | 20.00         | 0.00      | 9.00       | 0.00    | 6.00       | 24.00         | 1.00       |      |
| 648.00  | 22.00 | 84.00  | 190.00 | 23.27 | 2.00  | 1.00      | 2.00      | 1.00           | 0.00    | 0.00         | 1.00   | 1.00   | 6.00         | 17.14      | 1.00   | 28.00         | 0.00      | 4.00       | 1.00    | 8.00       | 32.00         | 1.00       |      |
| 649.00  | 19.00 | 48.00  | 156.00 | 19.72 | 2.00  | 1.00      | 2.00      | 1.00           | 0.00    |              |        |        |              |            |        |               |           |            |         |            |               |            |      |

| Subject | Age   | Weight | Height | BMI   | BMI_C | Residence | Education | Marital_Status | Smoking | Chronic_Dise | Gender | Health | Sitting_Time | PA_Min_Day | IPAQ_C | Dietary_Score | Dietary_C | PSQI_Total | Sleep_C | WHO5_Total | WHO5_Total100 | WHO5_Class |
|---------|-------|--------|--------|-------|-------|-----------|-----------|----------------|---------|--------------|--------|--------|--------------|------------|--------|---------------|-----------|------------|---------|------------|---------------|------------|
| 661.00  | 21.00 | 55.00  | 160.00 | 21.48 | 2.00  | 0.00      | 2.00      | 1.00           | 0.00    | 0.00         | 0.00   | 3.00   | 6.50         | 8.57       | 1.00   | 31.00         | 1.00      | 6.00       | 0.00    | 6.00       | 24.00         | 1.00       |
| 662.00  | 21.00 | 52.00  | 160.00 | 20.31 | 2.00  | 0.00      | 2.00      | 1.00           | 1.00    | 0.00         | 0.00   | 3.00   | 11.00        | 2.14       | 1.00   | 30.00         | 1.00      | 6.00       | 0.00    | 5.00       | 20.00         | 1.00       |
| 663.00  | 20.00 | 65.00  | 165.00 | 23.88 | 2.00  | 1.00      | 2.00      | 1.00           | 0.00    | 0.00         | 0.00   | 3.00   | 9.00         | 1.43       | 1.00   | 31.00         | 1.00      | 6.00       | 0.00    | 3.00       | 12.00         | 1.00       |
| 664.00  | 20.00 | 76.00  | 175.00 | 24.82 | 2.00  | 1.00      | 2.00      | 1.00           | 0.00    | 0.00         | 1.00   | 3.00   | 6.50         | 12.86      | 1.00   | 23.00         | 0.00      | 7.00       | 0.00    | 6.00       | 24.00         | 1.00       |
| 665.00  | 22.00 | 60.00  | 162.00 | 22.86 | 2.00  | 1.00      | 2.00      | 2.00           | 0.00    | 0.00         | 0.00   | 3.00   | 8.00         | 2.14       | 1.00   | 21.00         | 0.00      | 4.00       | 1.00    | 4.00       | 16.00         | 1.00       |
| 666.00  | 22.00 | 60.00  | 170.00 | 20.76 | 2.00  | 1.00      | 2.00      | 1.00           | 0.00    | 0.00         | 0.00   | 3.00   | 8.00         | 45.71      | 1.00   | 29.00         | 0.00      | 10.00      | 0.00    | 5.00       | 20.00         | 1.00       |
| 667.00  | 22.00 | 69.00  | 168.00 | 24.45 | 2.00  | 1.00      | 2.00      | 1.00           | 0.00    | 0.00         | 0.00   | 3.00   | 6.00         | 36.43      | 1.00   | 24.00         | 0.00      | 7.00       | 0.00    | 10.00      | 40.00         | 1.00       |
| 668.00  | 21.00 | 50.00  | 150.00 | 22.22 | 2.00  | 0.00      | 2.00      | 1.00           | 0.00    | 0.00         | 0.00   | 3.00   | 10.00        | 21.43      | 1.00   | 28.00         | 0.00      | 11.00      | 0.00    | 4.00       | 16.00         | 1.00       |
| 669.00  | 22.00 | 60.00  | 160.00 | 23.44 | 2.00  | 1.00      | 2.00      | 1.00           | 0.00    | 0.00         | 0.00   | 3.00   | 9.00         | 15.71      | 1.00   | 21.00         | 0.00      | 9.00       | 0.00    | 10.00      | 40.00         | 1.00       |
| 670.00  | 22.00 | 57.00  | 166.00 | 20.69 | 2.00  | 1.00      | 2.00      | 1.00           | 1.00    | 0.00         | 0.00   | 3.00   | 8.00         | 25.71      | 1.00   | 34.00         | 1.00      | 12.00      | 0.00    | 9.00       | 36.00         | 1.00       |
| 671.00  | 20.00 | 60.00  | 164.00 | 22.31 | 2.00  | 1.00      | 2.00      | 1.00           | 0.00    | 0.00         | 0.00   | 3.00   | 4.00         | 8.57       | 1.00   | 21.00         | 0.00      | 7.00       | 0.00    | 9.00       | 36.00         | 1.00       |
| 672.00  | 22.00 | 43.00  | 150.00 | 19.11 | 2.00  | 0.00      | 2.00      | 1.00           | 0.00    | 0.00         | 0.00   | 3.00   | 9.00         | 0.00       | 1.00   | 20.00         | 0.00      | 4.00       | 1.00    | 15.00      | 60.00         | 0.00       |
| 673.00  | 22.00 | 56.00  | 162.00 | 21.34 | 2.00  | 1.00      | 2.00      | 1.00           | 0.00    | 0.00         | 0.00   | 3.00   | 10.00        | 0.00       | 1.00   | 29.00         | 0.00      | 7.00       | 0.00    | 12.00      | 48.00         | 1.00       |
| 674.00  | 19.00 | 51.00  | 162.00 | 19.43 | 2.00  | 1.00      | 2.00      | 1.00           | 1.00    | 0.00         | 0.00   | 3.00   | 9.00         | 28.57      | 1.00   | 19.00         | 0.00      | 6.00       | 0.00    | 9.00       | 36.00         | 1.00       |
| 675.00  | 20.00 | 72.00  | 176.00 | 23.24 | 2.00  | 0.00      | 2.00      | 1.00           | 1.00    | 0.00         | 1.00   | 3.00   | 6.00         | 0.00       | 1.00   | 27.00         | 0.00      | 6.00       | 0.00    | 14.00      | 56.00         | 0.00       |
| 676.00  | 22.00 | 55.00  | 157.00 | 22.31 | 2.00  | 1.00      | 2.00      | 1.00           | 1.00    | 0.00         | 0.00   | 3.00   | 10.00        | 48.57      | 1.00   | 34.00         | 1.00      | 4.00       | 1.00    | 12.00      | 48.00         | 1.00       |
| 677.00  | 20.00 | 71.00  | 174.00 | 23.45 | 2.00  | 1.00      | 2.00      | 1.00           | 0.00    | 0.00         | 1.00   | 3.00   | 11.00        | 10.71      | 1.00   | 23.00         | 0.00      | 6.00       | 0.00    | 15.00      | 60.00         | 0.00       |
| 678.00  | 18.00 | 54.00  | 165.00 | 19.83 | 2.00  | 1.00      | 2.00      | 1.00           | 0.00    | 0.00         | 0.00   | 3.00   | 8.00         | 0.00       | 1.00   | 24.00         | 0.00      | 4.00       | 1.00    | 13.00      | 52.00         | 0.00       |
| 679.00  | 22.00 | 65.00  | 172.00 | 21.97 | 2.00  | 1.00      | 2.00      | 1.00           | 0.00    | 0.00         | 1.00   | 3.00   | 4.50         | 51.43      | 1.00   | 24.00         | 0.00      | 2.00       | 1.00    | 17.00      | 68.00         | 0.00       |
| 680.00  | 20.00 | 70.00  | 170.00 | 24.22 | 2.00  | 1.00      | 2.00      | 1.00           | 0.00    | 0.00         | 1.00   | 3.00   | 4.00         | 10.71      | 1.00   | 27.00         | 0.00      | 4.00       | 1.00    | 17.00      | 68.00         | 0.00       |
| 681.00  | 20.00 | 68.00  | 177.00 | 21.71 | 2.00  | 1.00      | 2.00      | 1.00           | 1.00    | 0.00         | 1.00   | 3.00   | 7.00         | 51.43      | 1.00   | 23.00         | 0.00      | 5.00       | 1.00    | 17.00      | 68.00         | 0.00       |
| 682.00  | 18.00 | 54.00  | 158.00 | 21.63 | 2.00  | 1.00      | 2.00      | 1.00           | 0.00    | 0.00         | 0.00   | 3.00   | 11.00        | 34.29      | 1.00   | 16.00         | 0.00      | 4.00       | 1.00    | 16.00      | 64.00         | 0.00       |
| 683.00  | 19.00 | 54.00  | 155.00 | 22.48 | 2.00  | 1.00      | 2.00      | 1.00           | 0.00    | 0.00         | 0.00   | 3.00   | 6.00         | 22.86      | 1.00   | 25.00         | 0.00      | 0.00       | 1.00    | 17.00      | 68.00         | 0.00       |
| 684.00  | 20.00 | 57.00  | 172.00 | 19.27 | 2.00  | 1.00      | 2.00      | 1.00           | 1.00    | 0.00         | 1.00   | 3.00   | 6.50         | 24.29      | 1.00   | 21.00         | 0.00      | 4.00       | 1.00    | 13.00      | 52.00         | 0.00       |
| 685.00  | 21.00 | 58.00  | 160.00 | 22.66 | 2.00  | 1.00      | 2.00      | 1.00           | 0.00    | 0.00         | 1.00   | 3.00   | 5.00         | 21.43      | 1.00   | 28.00         | 0.00      | 3.00       | 1.00    | 17.00      | 68.00         | 0.00       |
| 686.00  | 23.00 | 55.00  | 156.00 | 22.60 | 2.00  | 1.00      | 2.00      | 1.00           | 0.00    | 0.00         | 0.00   | 3.00   | 8.00         | 20.71      | 1.00   | 24.00         | 0.00      | 3.00       | 1.00    | 15.00      | 60.00         | 0.00       |
| 687.00  | 20.00 | 60.00  | 165.00 | 22.04 | 2.00  | 1.00      | 2.00      | 1.00           | 0.00    | 0.00         | 0.00   | 3.00   | 4.00         | 32.14      | 1.00   | 29.00         | 0.00      | 6.00       | 0.00    | 12.00      | 48.00         | 1.00       |
| 688.00  | 22.00 | 60.00  | 165.00 | 22.04 | 2.00  | 1.00      | 2.00      | 2.00           | 0.00    | 0.00         | 0.00   | 3.00   | 5.00         | 4.29       | 1.00   | 27.00         | 0.00      | 5.00       | 1.00    | 16.00      | 64.00         | 0.00       |
| 689.00  | 21.00 | 53.00  | 158.00 | 21.23 | 2.00  | 1.00      | 2.00      | 1.00           | 0.00    | 0.00         | 0.00   | 3.00   | 6.00         | 0.00       | 1.00   | 24.00         | 0.00      | 0.00       | 1.00    | 16.00      | 64.00         | 0.00       |
| 690.00  | 21.00 | 55.00  | 168.00 | 19.49 | 2.00  | 1.00      | 2.00      | 1.00           | 0.00    | 0.00         | 0.00   | 3.00   | 6.00         | 17.14      | 1.00   | 23.00         | 0.00      | 4.00       | 1.00    | 16.00      | 64.00         | 0.00       |
| 691.00  | 21.00 | 49.00  | 157.00 | 19.88 | 2.00  | 1.00      | 2.00      | 1.00           | 0.00    | 0.00         | 0.00   | 3.00   | 4.00         | 25.71      | 1.00   | 26.00         | 0.00      | 3.00       | 1.00    | 16.00      | 64.00         | 0.00       |
| 692.00  | 23.00 | 64.00  | 176.00 | 20.66 | 2.00  | 1.00      | 2.00      | 1.00           | 0.00    | 0.00         | 1.00   | 3.00   | 7.00         | 0.00       | 1.00   | 24.00         | 0.00      | 3.00       | 1.00    | 11.00      | 44.00         | 1.00       |
| 693.00  | 19.00 | 79.00  | 178.00 | 24.93 | 2.00  | 1.00      | 2.00      | 1.00           | 1.00    | 0.00         | 1.00   | 3.00   | 6.00         | 25.71      | 1.00   | 31.00         | 1.00      | 3.00       | 1.00    | 13.00      | 52.00         | 0.00       |
| 694.00  | 21.00 | 70.00  | 173.00 | 23.39 | 2.00  | 1.00      | 2.00      | 1.00           | 1.00    | 1.00         | 1.00   | 3.00   | 8.00         | 28.57      | 1.00   | 22.00         | 0.00      | 10.00      | 0.00    | 10.00      | 40.00         | 1.00       |
| 695.00  | 19.00 | 77.00  | 187.00 | 22.02 | 2.00  | 1.00      | 2.00      | 1.00           | 1.00    | 1.00         | 1.00   | 3.00   | 6.00         | 42.86      | 1.00   | 27.00         | 0.00      | 0.00       | 1.00    | 14.00      | 56.00         | 0.00       |
| 696.00  | 22.00 | 62.00  | 165.00 | 22.77 | 2.00  | 1.00      | 3.00      | 1.00           | 0.00    | 0.00         | 0.00   | 3.00   | 8.00         | 60.00      | 1.00   | 34.00         | 1.00      | 4.00       | 1.00    | 9.00       | 36.00         | 1.00       |
| 697.00  | 23.00 | 57.00  | 161.00 | 21.99 | 2.00  | 1.00      | 3.00      | 1.00           | 0.00    | 0.00         | 0.00   | 3.00   | 5.00         | 17.14      | 1.00   | 28.00         | 0.00      | 7.00       | 0.00    | 10.00      | 40.00         | 1.00       |
| 698.00  | 22.00 | 45.00  | 162.00 | 17.15 | 1.00  | 0.00      | 1.00      | 1.00           | 0.00    | 1.00         | 0.00   | 2.00   | 3.50         | 51.43      | 1.00   | 20.00         | 0.00      | 14.00      | 0.00    | 4.00       | 16.00         | 1.00       |
| 699.00  | 22.00 | 46.00  | 160.00 | 17.97 | 1.00  | 1.00      | 1.00      | 1.00           | 0.00    | 0.00         | 0.00   | 1.00   | 10.00        | 21.43      | 1.00   | 25.00         | 0.00      | 5.00       | 1.00    | 12.00      | 48.00         | 1.00       |
| 700.00  | 18.00 | 52.00  | 170.00 | 17.99 | 1.00  | 1.00      | 1.00      | 1.00           | 0.00    | 0.00         | 0.00   | 2.00   | 11.00        | 2.14       | 1.00   | 18.00         | 0.00      | 7.00       | 0.00    | 9.00       | 36.00         | 1.00       |
| 701.00  | 22.00 | 49.00  | 163.00 | 18.44 | 1.00  | 0.00      | 1.00      | 1.00           | 0.00    | 0.00         | 0.00   | 2.00   | 2.50         | 0.00       | 1.00   | 25.00         | 0.00      | 4.00       | 1.00    | 11.00      | 44.00         | 1.00       |
| 702.00  | 21.00 | 49.00  | 167.00 | 17.57 | 1.00  | 1.00      | 1.00      | 1.00           | 1.00    | 0.00         | 0.00   | 2.00   | 8.00         | 0.00       | 1.00   | 23.00         | 0.00      | 3.00       | 1.00    | 13.00      | 52.00         | 0.00       |
| 703.00  | 20.00 | 44.50  | 165.00 | 16.35 | 1.00  | 0.00      | 1.00      | 1.00           | 0.00    | 0.00         | 0.00   | 2.00   | 10.00        | 24.29      | 1.00   | 24.00         | 0.00      | 3.00       | 1.00    | 18.00      | 72.00         | 0.00       |
| 704.00  | 20.00 | 51.00  | 170.00 | 17.65 | 1.00  | 1.00      | 1.00      | 1.00           | 0.00    | 0.00         | 0.00   | 2.00   | 3.00         | 30.00      | 1.00   | 23.00         | 0.00      | 4.00       | 1.00    | 15.00      | 60.00         | 0.00       |
| 705.00  | 21.00 | 50.00  | 165.00 | 18.37 | 1.00  | 0.00      | 1.00      | 1.00           | 0.00    | 0.00         | 0.00   | 3.00   | 11.00        | 9.29       | 1.00   | 23.00         | 0.00      | 7.00       | 0.00    | 12.00      | 48.00         | 1.00       |
| 706.00  | 21.00 | 46.00  | 163.00 | 17.31 | 1.00  | 1.00      | 1.00      | 1.00           | 0.00    | 0.00         | 0.00   | 3.00   | 10.00        | 44.29      | 1.00   | 24.00         | 0.00      | 6.00       | 0.00    | 10.00      | 40.00         | 1.00       |
| 707.00  | 22.00 | 58.00  | 178.00 | 18.31 | 1.00  | 0.00      | 1.00      | 1.00           | 0.00    | 0.00         | 1.00   | 3.00   | 7.00         | 11.43      | 1.00   | 28.00         | 0.00      | 2.00       | 1.00    | 17.00      | 68.00         | 0.00       |
| 708.00  | 19.00 | 47.00  | 172.00 | 15.89 | 1.00  | 1.00      | 1.00      | 1.00           | 0.00    | 1.00         | 0.00   | 1.00   | 8.00         | 0.00       | 1.00   | 28.00         | 0.00      | 8.00       | 0.00    | 10.00      | 40.00         | 1.00       |
| 709.00  | 22.00 | 55.00  | 174.00 | 18.17 | 1.00  | 1.00      | 1.00      | 1.00           | 1.00    | 1.00         | 1.00   | 1.00   | 10.00        | 0.71       | 1.00   | 27.00         | 0.00      | 4.00       | 1.00    | 15.00      | 60.00         | 0.00       |
| 710.00  | 22.00 | 43.00  | 155.00 | 17.90 | 1.00  | 0.00      | 2.00      | 1.00           | 0.00    | 0.00         | 0.00   | 1.00   | 11.00        | 0.00       | 1.00   | 15.00         | 0.00      | 7.00       | 0.00    | 3.00       | 12.00         | 1.00       |
| 711.00  | 21.00 | 46.00  | 169.00 | 16.11 | 1.00  | 1.00      | 2.00      | 1.00           | 1.00    | 0.00         | 0.00   | 1.00   | 8.00         | 8.57       | 1.00   | 31.00         | 1.00      | 12.00      | 0.00    | 8.00       | 32.00         | 1.00       |
| 712.00  | 21.00 | 46.00  | 165.00 | 16.90 | 1.00  | 1.00      | 2.00      | 1.00           | 0.00    | 0.00         | 0.00   | 2.00   | 2.50         | 2.14       | 1.00   | 29.00         | 0.00      | 12.00      | 0.00    | 3.00       | 12.00         | 1.00       |
| 713.00  | 20.00 | 47.00  | 169.00 | 16.46 | 1.00  | 1.00      | 2.00      | 1.00           | 0.00    | 0.00         | 0.00   | 2.00   | 4.50         | 43.57      | 1.00   | 32.00         | 1.00      | 3.00       | 1.00    | 15.00      | 60.00         | 0.00       |
| 714.00  | 20.00 | 50.00  | 165.00 | 18.37 | 1.00  | 1.00      | 2.00      | 1.00           | 1.00    | 0.00         | 0.00   | 2.00   | 11.00        | 4.29       | 1.00   | 25.00         | 0.00      | 4.00       | 1.00    | 14.00      | 56.00         | 0.00       |
| 715.00  | 22.00 | 48.00  | 165.00 | 17.63 | 1.00  | 1.00      | 2.00      | 1.00           | 1.00    | 0.00         | 0.00   |        |              |            |        |               |           |            |         |            |               |            |

| Subject | Age   | Weight | Height | BMI   | BMI_C | Residence | Education | Marital_Status | Smoking | Chronic_Dise | Gender | Health | Sitting_Time | PA_Min_Day | IPAQ_C | Dietary_Score | Dietary_C | PSQI_Total | Sleep_C | WHO5_Total | WHO5_Total100 | WHO5_Class |
|---------|-------|--------|--------|-------|-------|-----------|-----------|----------------|---------|--------------|--------|--------|--------------|------------|--------|---------------|-----------|------------|---------|------------|---------------|------------|
| 727.00  | 20.00 | 67.00  | 176.00 | 21.63 | 2.00  | 0.00      | 2.00      | 1.00           | 0.00    | 0.00         | 1.00   | 2.00   | 6.00         | 34.29      | 1.00   | 22.00         | 0.00      | 9.00       | 0.00    | 12.00      | 48.00         | 1.00       |
| 728.00  | 23.00 | 50.00  | 157.00 | 20.28 | 2.00  | 1.00      | 2.00      | 1.00           | 0.00    | 0.00         | 0.00   | 2.00   | 5.00         | 17.14      | 1.00   | 29.00         | 0.00      | 6.00       | 0.00    | 12.00      | 48.00         | 1.00       |
| 729.00  | 20.00 | 70.00  | 180.00 | 21.60 | 2.00  | 1.00      | 2.00      | 1.00           | 0.00    | 0.00         | 1.00   | 3.00   | 10.00        | 2.86       | 1.00   | 32.00         | 1.00      | 10.00      | 0.00    | 6.00       | 24.00         | 1.00       |
| 730.00  | 21.00 | 68.00  | 166.00 | 24.68 | 2.00  | 1.00      | 2.00      | 1.00           | 0.00    | 0.00         | 0.00   | 3.00   | 6.00         | 51.43      | 1.00   | 18.00         | 0.00      | 7.00       | 0.00    | 9.00       | 36.00         | 1.00       |
| 731.00  | 20.00 | 68.00  | 170.00 | 23.53 | 2.00  | 1.00      | 2.00      | 1.00           | 0.00    | 0.00         | 0.00   | 3.00   | 7.00         | 0.00       | 1.00   | 21.00         | 0.00      | 5.00       | 1.00    | 9.00       | 36.00         | 1.00       |
| 732.00  | 23.00 | 58.00  | 163.00 | 21.83 | 2.00  | 1.00      | 2.00      | 1.00           | 0.00    | 0.00         | 0.00   | 3.00   | 3.00         | 11.43      | 1.00   | 31.00         | 1.00      | 4.00       | 1.00    | 13.00      | 52.00         | 0.00       |
| 733.00  | 20.00 | 80.00  | 183.00 | 23.89 | 2.00  | 1.00      | 2.00      | 1.00           | 1.00    | 0.00         | 1.00   | 3.00   | 2.00         | 38.57      | 1.00   | 35.00         | 1.00      | 4.00       | 1.00    | 16.00      | 64.00         | 0.00       |
| 734.00  | 23.00 | 55.00  | 157.00 | 22.31 | 2.00  | 1.00      | 2.00      | 1.00           | 0.00    | 0.00         | 0.00   | 3.00   | 6.50         | 2.86       | 1.00   | 16.00         | 0.00      | 5.00       | 1.00    | 16.00      | 64.00         | 0.00       |
| 735.00  | 20.00 | 50.00  | 158.00 | 20.03 | 2.00  | 1.00      | 2.00      | 1.00           | 0.00    | 1.00         | 0.00   | 3.00   | 6.50         | 40.00      | 1.00   | 30.00         | 1.00      | 3.00       | 1.00    | 17.00      | 68.00         | 0.00       |
| 736.00  | 23.00 | 88.00  | 165.00 | 32.32 | 4.00  | 0.00      | 2.00      | 1.00           | 0.00    | 0.00         | 0.00   | 3.00   | 8.00         | 10.00      | 1.00   | 30.00         | 1.00      | 5.00       | 1.00    | 6.00       | 24.00         | 1.00       |
| 737.00  | 20.00 | 103.00 | 175.00 | 33.63 | 4.00  | 1.00      | 2.00      | 1.00           | 0.00    | 0.00         | 1.00   | 3.00   | 1.00         | 34.86      | 1.00   | 20.00         | 0.00      | 5.00       | 1.00    | 15.00      | 60.00         | 0.00       |
| 738.00  | 18.00 | 65.00  | 156.00 | 26.71 | 3.00  | 1.00      | 1.00      | 1.00           | 0.00    | 0.00         | 0.00   | 3.00   | 7.00         | 1.71       | 1.00   | 27.00         | 0.00      | 10.00      | 0.00    | 18.00      | 72.00         | 0.00       |
| 739.00  | 22.00 | 70.00  | 155.00 | 29.14 | 3.00  | 0.00      | 2.00      | 1.00           | 1.00    | 0.00         | 0.00   | 1.00   | 11.00        | 8.57       | 1.00   | 19.00         | 0.00      | 7.00       | 0.00    | 9.00       | 36.00         | 1.00       |
| 740.00  | 19.00 | 74.00  | 170.00 | 25.61 | 3.00  | 1.00      | 2.00      | 1.00           | 1.00    | 0.00         | 1.00   | 2.00   | 6.00         | 12.86      | 1.00   | 22.00         | 0.00      | 4.00       | 1.00    | 13.00      | 52.00         | 0.00       |
| 741.00  | 22.00 | 83.00  | 180.00 | 25.62 | 3.00  | 0.00      | 3.00      | 1.00           | 0.00    | 0.00         | 1.00   | 3.00   | 11.00        | 51.43      | 1.00   | 23.00         | 0.00      | 5.00       | 1.00    | 14.00      | 56.00         | 0.00       |
| 742.00  | 19.00 | 50.00  | 156.00 | 20.55 | 2.00  | 1.00      | 1.00      | 1.00           | 0.00    | 0.00         | 0.00   | 1.00   | 7.00         | 21.43      | 1.00   | 25.00         | 0.00      | 7.00       | 0.00    | 9.00       | 36.00         | 1.00       |
| 743.00  | 20.00 | 59.00  | 167.00 | 21.16 | 2.00  | 0.00      | 1.00      | 1.00           | 0.00    | 0.00         | 1.00   | 3.00   | 4.50         | 25.71      | 1.00   | 19.00         | 0.00      | 4.00       | 1.00    | 16.00      | 64.00         | 0.00       |
| 744.00  | 19.00 | 60.00  | 165.00 | 22.04 | 2.00  | 1.00      | 1.00      | 2.00           | 0.00    | 0.00         | 0.00   | 1.00   | 8.00         | 8.86       | 1.00   | 23.00         | 0.00      | 9.00       | 0.00    | 7.00       | 28.00         | 1.00       |
| 745.00  | 20.00 | 54.00  | 160.00 | 21.09 | 2.00  | 1.00      | 1.00      | 2.00           | 0.00    | 0.00         | 0.00   | 3.00   | 10.00        | 12.57      | 1.00   | 20.00         | 0.00      | 11.00      | 0.00    | 7.00       | 28.00         | 1.00       |
| 746.00  | 22.00 | 56.00  | 154.00 | 23.61 | 2.00  | 0.00      | 1.00      | 1.00           | 0.00    | 1.00         | 0.00   | 1.00   | 10.00        | 0.00       | 1.00   | 23.00         | 0.00      | 4.00       | 1.00    | 10.00      | 40.00         | 1.00       |
| 747.00  | 18.00 | 64.00  | 170.00 | 22.15 | 2.00  | 1.00      | 1.00      | 1.00           | 0.00    | 1.00         | 0.00   | 2.00   | 11.00        | 32.14      | 1.00   | 14.00         | 0.00      | 9.00       | 0.00    | 9.00       | 36.00         | 1.00       |
| 748.00  | 21.00 | 68.00  | 180.00 | 20.99 | 2.00  | 1.00      | 1.00      | 1.00           | 1.00    | 1.00         | 1.00   | 2.00   | 6.00         | 10.00      | 1.00   | 20.00         | 0.00      | 11.00      | 0.00    | 11.00      | 44.00         | 1.00       |
| 749.00  | 22.00 | 56.00  | 156.00 | 23.01 | 2.00  | 1.00      | 2.00      | 1.00           | 1.00    | 0.00         | 0.00   | 2.00   | 11.00        | 51.43      | 1.00   | 15.00         | 0.00      | 6.00       | 0.00    | 4.00       | 16.00         | 1.00       |
| 750.00  | 22.00 | 47.00  | 159.00 | 18.59 | 2.00  | 0.00      | 2.00      | 1.00           | 0.00    | 0.00         | 0.00   | 2.00   | 7.00         | 3.14       | 1.00   | 22.00         | 0.00      | 5.00       | 1.00    | 12.00      | 48.00         | 1.00       |
| 751.00  | 21.00 | 56.00  | 167.00 | 20.08 | 2.00  | 0.00      | 2.00      | 1.00           | 1.00    | 0.00         | 0.00   | 3.00   | 9.00         | 7.14       | 1.00   | 17.00         | 0.00      | 8.00       | 0.00    | 15.00      | 60.00         | 0.00       |
| 752.00  | 21.00 | 47.00  | 155.00 | 19.56 | 2.00  | 1.00      | 2.00      | 1.00           | 0.00    | 0.00         | 0.00   | 3.00   | 8.00         | 21.43      | 1.00   | 32.00         | 1.00      | 7.00       | 0.00    | 9.00       | 36.00         | 1.00       |
| 753.00  | 23.00 | 69.00  | 170.00 | 23.88 | 2.00  | 0.00      | 2.00      | 1.00           | 0.00    | 0.00         | 1.00   | 3.00   | 10.00        | 25.71      | 1.00   | 24.00         | 0.00      | 6.00       | 0.00    | 15.00      | 60.00         | 0.00       |
| 754.00  | 20.00 | 64.00  | 165.00 | 23.51 | 2.00  | 1.00      | 2.00      | 1.00           | 0.00    | 0.00         | 0.00   | 3.00   | 5.00         | 27.86      | 1.00   | 22.00         | 0.00      | 6.00       | 0.00    | 10.00      | 40.00         | 1.00       |
| 755.00  | 20.00 | 68.00  | 175.00 | 22.20 | 2.00  | 0.00      | 2.00      | 1.00           | 1.00    | 0.00         | 1.00   | 3.00   | 4.00         | 57.86      | 1.00   | 24.00         | 0.00      | 4.00       | 1.00    | 21.00      | 84.00         | 0.00       |
| 756.00  | 21.00 | 50.00  | 155.00 | 20.81 | 2.00  | 1.00      | 2.00      | 1.00           | 0.00    | 0.00         | 0.00   | 3.00   | 12.00        | 1.43       | 1.00   | 14.00         | 0.00      | 4.00       | 1.00    | 13.00      | 52.00         | 0.00       |
| 757.00  | 23.00 | 70.00  | 176.00 | 22.60 | 2.00  | 1.00      | 2.00      | 1.00           | 0.00    | 1.00         | 1.00   | 2.00   | 1.00         | 17.14      | 1.00   | 36.00         | 1.00      | 5.00       | 1.00    | 12.00      | 48.00         | 1.00       |
| 758.00  | 21.00 | 55.00  | 176.00 | 17.76 | 1.00  | 1.00      | 1.00      | 1.00           | 1.00    | 1.00         | 1.00   | 2.00   | 6.00         | 31.43      | 1.00   | 23.00         | 0.00      | 3.00       | 1.00    | 13.00      | 52.00         | 0.00       |
| 759.00  | 20.00 | 50.00  | 165.00 | 18.37 | 1.00  | 1.00      | 2.00      | 1.00           | 1.00    | 0.00         | 0.00   | 3.00   | 10.00        | 10.00      | 1.00   | 21.00         | 0.00      | 2.00       | 1.00    | 17.00      | 68.00         | 0.00       |
| 760.00  | 28.00 | 105.00 | 169.00 | 36.76 | 4.00  | 1.00      | 2.00      | 1.00           | 1.00    | 0.00         | 1.00   | 1.00   | 7.00         | 17.14      | 1.00   | 35.00         | 1.00      | 11.00      | 0.00    | 14.00      | 56.00         | 0.00       |
| 761.00  | 25.00 | 87.00  | 180.00 | 26.85 | 3.00  | 0.00      | 2.00      | 1.00           | 0.00    | 0.00         | 1.00   | 2.00   | 11.00        | 0.00       | 1.00   | 20.00         | 0.00      | 9.00       | 0.00    | 7.00       | 28.00         | 1.00       |
| 762.00  | 27.00 | 100.00 | 185.00 | 29.22 | 3.00  | 1.00      | 2.00      | 1.00           | 0.00    | 0.00         | 1.00   | 3.00   | 8.00         | 25.71      | 1.00   | 29.00         | 0.00      | 9.00       | 0.00    | 7.00       | 28.00         | 1.00       |
| 763.00  | 24.00 | 76.00  | 170.00 | 26.30 | 3.00  | 1.00      | 2.00      | 1.00           | 0.00    | 0.00         | 1.00   | 3.00   | 4.00         | 22.86      | 1.00   | 32.00         | 1.00      | 5.00       | 1.00    | 11.00      | 44.00         | 1.00       |
| 764.00  | 25.00 | 90.00  | 180.00 | 27.78 | 3.00  | 1.00      | 2.00      | 2.00           | 0.00    | 0.00         | 1.00   | 3.00   | 5.00         | 17.14      | 1.00   | 33.00         | 1.00      | 3.00       | 1.00    | 12.00      | 48.00         | 1.00       |
| 765.00  | 26.00 | 78.00  | 173.00 | 26.06 | 3.00  | 0.00      | 2.00      | 1.00           | 1.00    | 1.00         | 1.00   | 2.00   | 10.00        | 20.00      | 1.00   | 33.00         | 1.00      | 6.00       | 0.00    | 12.00      | 48.00         | 1.00       |
| 766.00  | 27.00 | 84.00  | 178.00 | 26.51 | 3.00  | 0.00      | 2.00      | 1.00           | 1.00    | 1.00         | 1.00   | 2.00   | 3.00         | 30.00      | 1.00   | 22.00         | 0.00      | 4.00       | 1.00    | 15.00      | 60.00         | 0.00       |
| 767.00  | 25.00 | 70.00  | 155.00 | 29.14 | 3.00  | 1.00      | 2.00      | 1.00           | 1.00    | 1.00         | 0.00   | 3.00   | 8.00         | 8.57       | 1.00   | 21.00         | 0.00      | 5.00       | 1.00    | 4.00       | 16.00         | 1.00       |
| 768.00  | 24.00 | 65.00  | 163.00 | 24.46 | 2.00  | 1.00      | 2.00      | 2.00           | 0.00    | 0.00         | 0.00   | 3.00   | 7.00         | 10.00      | 1.00   | 33.00         | 1.00      | 4.00       | 1.00    | 13.00      | 52.00         | 0.00       |
| 769.00  | 28.00 | 75.00  | 176.00 | 24.21 | 2.00  | 1.00      | 2.00      | 1.00           | 1.00    | 1.00         | 1.00   | 2.00   | 5.00         | 13.57      | 1.00   | 25.00         | 0.00      | 8.00       | 0.00    | 12.00      | 48.00         | 1.00       |
| 770.00  | 25.00 | 70.00  | 169.00 | 24.51 | 2.00  | 1.00      | 2.00      | 1.00           | 0.00    | 0.00         | 1.00   | 2.00   | 5.00         | 15.71      | 1.00   | 22.00         | 0.00      | 6.00       | 0.00    | 16.00      | 64.00         | 0.00       |
| 771.00  | 28.00 | 60.00  | 165.00 | 22.04 | 2.00  | 1.00      | 2.00      | 2.00           | 1.00    | 0.00         | 0.00   | 3.00   | 8.00         | 31.43      | 1.00   | 34.00         | 1.00      | 5.00       | 1.00    | 5.00       | 20.00         | 1.00       |
| 772.00  | 26.00 | 58.00  | 170.00 | 20.07 | 2.00  | 1.00      | 2.00      | 3.00           | 0.00    | 0.00         | 0.00   | 3.00   | 8.00         | 17.14      | 1.00   | 30.00         | 1.00      | 8.00       | 0.00    | 8.00       | 32.00         | 1.00       |
| 773.00  | 27.00 | 71.00  | 180.00 | 21.91 | 2.00  | 1.00      | 2.00      | 1.00           | 0.00    | 0.00         | 1.00   | 3.00   | 3.50         | 30.00      | 1.00   | 31.00         | 1.00      | 9.00       | 0.00    | 6.00       | 24.00         | 1.00       |
| 774.00  | 28.00 | 54.00  | 166.00 | 19.60 | 2.00  | 1.00      | 2.00      | 2.00           | 0.00    | 0.00         | 0.00   | 3.00   | 8.00         | 27.86      | 1.00   | 28.00         | 0.00      | 6.00       | 0.00    | 14.00      | 56.00         | 0.00       |
| 775.00  | 30.00 | 50.00  | 153.00 | 21.36 | 2.00  | 1.00      | 2.00      | 2.00           | 0.00    | 0.00         | 0.00   | 3.00   | 9.00         | 25.71      | 1.00   | 22.00         | 0.00      | 6.00       | 0.00    | 9.00       | 36.00         | 1.00       |
| 776.00  | 26.00 | 65.00  | 165.00 | 23.88 | 2.00  | 1.00      | 2.00      | 1.00           | 0.00    | 0.00         | 0.00   | 3.00   | 4.00         | 8.57       | 1.00   | 27.00         | 0.00      | 1.00       | 1.00    | 14.00      | 56.00         | 0.00       |
| 777.00  | 29.00 | 72.00  | 179.00 | 22.47 | 2.00  | 1.00      | 2.00      | 2.00           | 0.00    | 0.00         | 1.00   | 3.00   | 2.50         | 42.86      | 1.00   | 26.00         | 0.00      | 3.00       | 1.00    | 16.00      | 64.00         | 0.00       |
| 778.00  | 24.00 | 70.00  | 173.00 | 23.39 | 2.00  | 1.00      | 2.00      | 1.00           | 1.00    | 1.00         | 1.00   | 2.00   | 7.00         | 0.00       | 1.00   | 23.00         | 0.00      | 6.00       | 0.00    | 6.00       | 24.00         | 1.00       |
| 779.00  | 25.00 | 107.00 | 185.00 | 31.26 | 4.00  | 1.00      | 2.00      | 1.00           | 1.00    | 1.00         | 1.00   | 1.00   | 6.50         | 30.00      | 1.00   | 15.00         | 0.00      | 12.00      | 0.00    | 9.00       | 36.00         | 1.00       |
| 780.00  | 29.00 | 115.00 | 182.00 | 34.72 | 4.00  | 1.00      | 2.00      | 2.00           | 1.00    | 0.00         | 1.00   | 1.00   | 9.00         | 0.00       | 1.00   | 14.00         | 0.00      | 9.00       | 0.00    | 3.00       | 12.00         | 1.00       |
| 781.00  | 31.00 | 90.00  | 166.00 | 32.66 | 4.00  | 1.00      | 2.00      | 3.00           | 1.00    | 0.00         |        |        |              |            |        |               |           |            |         |            |               |            |

| Subject | Age   | Weight | Height | BMI   | BMI_C | Residence | Education | Marital_Status | Smoking | Chronic_Dise | Gender | Health | Sitting_Time | PA_Min_Day | IPAQ_C | Dietary_Score | Dietary_C | PSQI_Total | Sleep_C | WHO5_Total | WHO5_Total100 | WHO5_Class |
|---------|-------|--------|--------|-------|-------|-----------|-----------|----------------|---------|--------------|--------|--------|--------------|------------|--------|---------------|-----------|------------|---------|------------|---------------|------------|
| 793.00  | 28.00 | 73.00  | 176.00 | 23.57 | 2.00  | 1.00      | 2.00      | 2.00           | 1.00    | 0.00         | 1.00   | 2.00   | 5.00         | 0.00       | 1.00   | 25.00         | 0.00      | 6.00       | 0.00    | 14.00      | 56.00         | 0.00       |
| 794.00  | 32.00 | 63.00  | 160.00 | 24.61 | 2.00  | 1.00      | 2.00      | 2.00           | 0.00    | 0.00         | 0.00   | 2.00   | 5.00         | 0.00       | 1.00   | 27.00         | 0.00      | 3.00       | 1.00    | 15.00      | 60.00         | 0.00       |
| 795.00  | 28.00 | 76.00  | 176.00 | 24.54 | 2.00  | 1.00      | 2.00      | 1.00           | 0.00    | 0.00         | 1.00   | 3.00   | 5.50         | 14.29      | 1.00   | 18.00         | 0.00      | 8.00       | 0.00    | 5.00       | 20.00         | 1.00       |
| 796.00  | 30.00 | 70.00  | 174.00 | 23.12 | 2.00  | 1.00      | 2.00      | 1.00           | 1.00    | 0.00         | 1.00   | 3.00   | 6.00         | 12.86      | 1.00   | 30.00         | 1.00      | 4.00       | 1.00    | 19.00      | 76.00         | 0.00       |
| 797.00  | 25.00 | 70.00  | 175.00 | 22.86 | 2.00  | 1.00      | 2.00      | 2.00           | 0.00    | 0.00         | 1.00   | 3.00   | 7.00         | 42.86      | 1.00   | 24.00         | 0.00      | 4.00       | 1.00    | 19.00      | 76.00         | 0.00       |
| 798.00  | 30.00 | 65.00  | 170.00 | 22.49 | 2.00  | 1.00      | 2.00      | 3.00           | 1.00    | 0.00         | 1.00   | 3.00   | 5.50         | 22.86      | 1.00   | 23.00         | 0.00      | 5.00       | 1.00    | 12.00      | 48.00         | 1.00       |
| 799.00  | 29.00 | 58.00  | 170.00 | 20.07 | 2.00  | 1.00      | 2.00      | 2.00           | 0.00    | 1.00         | 1.00   | 2.00   | 6.00         | 0.00       | 1.00   | 28.00         | 0.00      | 4.00       | 1.00    | 17.00      | 68.00         | 0.00       |
| 800.00  | 28.00 | 79.00  | 179.00 | 24.66 | 2.00  | 0.00      | 3.00      | 1.00           | 1.00    | 0.00         | 1.00   | 3.00   | 4.00         | 42.86      | 1.00   | 34.00         | 1.00      | 6.00       | 0.00    | 13.00      | 52.00         | 0.00       |
| 801.00  | 30.00 | 78.00  | 178.00 | 24.62 | 2.00  | 1.00      | 3.00      | 2.00           | 0.00    | 1.00         | 0.00   | 2.00   | 6.00         | 2.14       | 1.00   | 23.00         | 0.00      | 13.00      | 0.00    | 4.00       | 16.00         | 1.00       |
| 802.00  | 26.00 | 98.00  | 175.00 | 32.00 | 4.00  | 1.00      | 2.00      | 2.00           | 0.00    | 0.00         | 1.00   | 3.00   | 10.00        | 0.00       | 1.00   | 23.00         | 0.00      | 5.00       | 1.00    | 15.00      | 60.00         | 0.00       |
| 803.00  | 27.00 | 95.00  | 180.00 | 29.32 | 3.00  | 0.00      | 2.00      | 2.00           | 0.00    | 0.00         | 1.00   | 3.00   | 5.00         | 0.00       | 1.00   | 28.00         | 0.00      | 8.00       | 0.00    | 15.00      | 60.00         | 0.00       |
| 804.00  | 25.00 | 80.00  | 177.00 | 25.54 | 3.00  | 1.00      | 2.00      | 1.00           | 0.00    | 1.00         | 1.00   | 2.00   | 11.00        | 32.14      | 1.00   | 29.00         | 0.00      | 4.00       | 1.00    | 12.00      | 48.00         | 1.00       |
| 805.00  | 31.00 | 84.00  | 182.00 | 25.36 | 3.00  | 1.00      | 2.00      | 2.00           | 0.00    | 1.00         | 1.00   | 2.00   | 8.00         | 8.57       | 1.00   | 25.00         | 0.00      | 3.00       | 1.00    | 16.00      | 64.00         | 0.00       |
| 806.00  | 31.00 | 61.00  | 167.00 | 21.87 | 2.00  | 1.00      | 2.00      | 2.00           | 0.00    | 0.00         | 0.00   | 3.00   | 8.00         | 45.71      | 1.00   | 33.00         | 1.00      | 1.00       | 1.00    | 13.00      | 52.00         | 0.00       |
| 807.00  | 27.00 | 58.00  | 159.00 | 22.94 | 2.00  | 1.00      | 2.00      | 2.00           | 0.00    | 0.00         | 0.00   | 3.00   | 6.50         | 21.43      | 1.00   | 42.00         | 1.00      | 1.00       | 1.00    | 17.00      | 68.00         | 0.00       |
| 808.00  | 25.00 | 64.00  | 163.00 | 24.09 | 2.00  | 1.00      | 3.00      | 1.00           | 0.00    | 1.00         | 0.00   | 3.00   | 11.00        | 51.43      | 1.00   | 28.00         | 0.00      | 1.00       | 1.00    | 13.00      | 52.00         | 0.00       |
| 809.00  | 24.00 | 81.00  | 163.00 | 30.49 | 4.00  | 1.00      | 2.00      | 2.00           | 1.00    | 1.00         | 1.00   | 2.00   | 11.00        | 0.00       | 1.00   | 30.00         | 1.00      | 8.00       | 0.00    | 12.00      | 48.00         | 1.00       |
| 810.00  | 25.00 | 110.00 | 170.00 | 38.06 | 4.00  | 0.00      | 3.00      | 1.00           | 1.00    | 0.00         | 1.00   | 3.00   | 1.00         | 25.71      | 1.00   | 24.00         | 0.00      | 4.00       | 1.00    | 16.00      | 64.00         | 0.00       |
| 811.00  | 27.00 | 88.00  | 187.00 | 25.17 | 3.00  | 1.00      | 1.00      | 1.00           | 1.00    | 1.00         | 1.00   | 2.00   | 6.00         | 38.57      | 1.00   | 24.00         | 0.00      | 4.00       | 1.00    | 11.00      | 44.00         | 1.00       |
| 812.00  | 24.00 | 76.00  | 170.00 | 26.30 | 3.00  | 1.00      | 1.00      | 1.00           | 0.00    | 0.00         | 1.00   | 3.00   | 4.00         | 11.43      | 1.00   | 31.00         | 1.00      | 3.00       | 1.00    | 18.00      | 72.00         | 0.00       |
| 813.00  | 26.00 | 70.00  | 165.00 | 25.71 | 3.00  | 1.00      | 2.00      | 2.00           | 0.00    | 0.00         | 0.00   | 2.00   | 3.00         | 38.57      | 1.00   | 29.00         | 0.00      | 8.00       | 0.00    | 12.00      | 48.00         | 1.00       |
| 814.00  | 30.00 | 67.00  | 170.00 | 23.18 | 2.00  | 1.00      | 1.00      | 2.00           | 0.00    | 0.00         | 1.00   | 3.00   | 7.00         | 17.14      | 1.00   | 30.00         | 1.00      | 4.00       | 1.00    | 13.00      | 52.00         | 0.00       |
| 815.00  | 29.00 | 81.00  | 183.00 | 24.19 | 2.00  | 1.00      | 1.00      | 1.00           | 0.00    | 0.00         | 1.00   | 3.00   | 6.00         | 25.71      | 1.00   | 24.00         | 0.00      | 4.00       | 1.00    | 19.00      | 76.00         | 0.00       |
| 816.00  | 32.00 | 65.00  | 168.00 | 23.03 | 2.00  | 1.00      | 1.00      | 1.00           | 0.00    | 0.00         | 1.00   | 3.00   | 10.00        | 17.14      | 1.00   | 30.00         | 1.00      | 3.00       | 1.00    | 17.00      | 68.00         | 0.00       |
| 817.00  | 27.00 | 85.00  | 190.00 | 23.55 | 2.00  | 0.00      | 1.00      | 1.00           | 1.00    | 1.00         | 1.00   | 1.00   | 3.00         | 24.29      | 1.00   | 25.00         | 0.00      | 10.00      | 0.00    | 9.00       | 36.00         | 1.00       |
| 818.00  | 27.00 | 70.00  | 180.00 | 21.60 | 2.00  | 1.00      | 1.00      | 1.00           | 1.00    | 1.00         | 1.00   | 2.00   | 6.00         | 0.00       | 1.00   | 32.00         | 1.00      | 4.00       | 1.00    | 15.00      | 60.00         | 0.00       |
| 819.00  | 27.00 | 77.00  | 188.00 | 21.79 | 2.00  | 1.00      | 1.00      | 2.00           | 1.00    | 1.00         | 1.00   | 2.00   | 5.50         | 22.86      | 1.00   | 32.00         | 1.00      | 4.00       | 1.00    | 14.00      | 56.00         | 0.00       |
| 820.00  | 27.00 | 54.00  | 167.00 | 19.36 | 2.00  | 0.00      | 1.00      | 2.00           | 0.00    | 0.00         | 1.00   | 3.00   | 7.00         | 60.00      | 1.00   | 32.00         | 1.00      | 2.00       | 1.00    | 17.00      | 68.00         | 0.00       |
| 821.00  | 30.00 | 60.00  | 156.00 | 24.65 | 2.00  | 0.00      | 2.00      | 2.00           | 1.00    | 0.00         | 0.00   | 3.00   | 1.50         | 0.00       | 1.00   | 39.00         | 1.00      | 6.00       | 0.00    | 17.00      | 68.00         | 0.00       |
| 822.00  | 24.00 | 68.00  | 173.00 | 22.72 | 2.00  | 1.00      | 2.00      | 1.00           | 1.00    | 1.00         | 0.00   | 3.00   | 6.00         | 64.29      | 1.00   | 28.00         | 0.00      | 4.00       | 1.00    | 16.00      | 64.00         | 0.00       |
| 823.00  | 31.00 | 70.00  | 180.00 | 21.60 | 2.00  | 1.00      | 3.00      | 1.00           | 0.00    | 0.00         | 1.00   | 2.00   | 1.00         | 2.14       | 1.00   | 23.00         | 0.00      | 5.00       | 1.00    | 9.00       | 36.00         | 1.00       |
| 824.00  | 30.00 | 77.00  | 173.00 | 25.73 | 3.00  | 1.00      | 2.00      | 2.00           | 0.00    | 0.00         | 1.00   | 3.00   | 6.00         | 62.14      | 1.00   | 25.00         | 0.00      | 6.00       | 0.00    | 15.00      | 60.00         | 0.00       |
| 825.00  | 29.00 | 70.00  | 157.00 | 28.40 | 3.00  | 1.00      | 2.00      | 1.00           | 1.00    | 1.00         | 0.00   | 3.00   | 4.50         | 0.00       | 1.00   | 16.00         | 0.00      | 5.00       | 1.00    | 10.00      | 40.00         | 1.00       |
| 826.00  | 31.00 | 56.00  | 154.00 | 23.61 | 2.00  | 1.00      | 2.00      | 2.00           | 0.00    | 0.00         | 0.00   | 1.00   | 3.50         | 0.00       | 1.00   | 33.00         | 1.00      | 6.00       | 0.00    | 8.00       | 32.00         | 1.00       |
| 827.00  | 25.00 | 68.00  | 165.00 | 24.98 | 2.00  | 1.00      | 2.00      | 2.00           | 0.00    | 0.00         | 0.00   | 2.00   | 7.00         | 8.57       | 1.00   | 26.00         | 0.00      | 4.00       | 1.00    | 12.00      | 48.00         | 1.00       |
| 828.00  | 32.00 | 68.00  | 168.00 | 24.09 | 2.00  | 1.00      | 2.00      | 1.00           | 0.00    | 0.00         | 0.00   | 3.00   | 8.00         | 17.14      | 1.00   | 30.00         | 1.00      | 6.00       | 0.00    | 23.00      | 92.00         | 0.00       |
| 829.00  | 28.00 | 55.00  | 159.00 | 21.76 | 2.00  | 1.00      | 2.00      | 2.00           | 0.00    | 1.00         | 0.00   | 2.00   | 10.00        | 0.00       | 1.00   | 32.00         | 1.00      | 6.00       | 0.00    | 12.00      | 48.00         | 1.00       |
| 830.00  | 28.00 | 58.00  | 163.00 | 21.83 | 2.00  | 1.00      | 3.00      | 1.00           | 0.00    | 0.00         | 0.00   | 3.00   | 6.50         | 40.29      | 1.00   | 30.00         | 1.00      | 4.00       | 1.00    | 21.00      | 84.00         | 0.00       |
| 831.00  | 27.00 | 49.00  | 163.00 | 18.44 | 1.00  | 1.00      | 2.00      | 2.00           | 0.00    | 0.00         | 0.00   | 3.00   | 7.00         | 0.00       | 1.00   | 27.00         | 0.00      | 6.00       | 0.00    | 12.00      | 48.00         | 1.00       |
| 832.00  | 26.00 | 45.00  | 157.00 | 18.26 | 1.00  | 1.00      | 2.00      | 1.00           | 0.00    | 0.00         | 0.00   | 3.00   | 6.50         | 21.43      | 1.00   | 35.00         | 1.00      | 1.00       | 1.00    | 16.00      | 64.00         | 0.00       |
| 833.00  | 29.00 | 82.00  | 161.00 | 31.63 | 4.00  | 1.00      | 1.00      | 2.00           | 0.00    | 0.00         | 0.00   | 3.00   | 5.00         | 0.00       | 1.00   | 24.00         | 0.00      | 6.00       | 0.00    | 17.00      | 68.00         | 0.00       |
| 834.00  | 32.00 | 99.00  | 161.00 | 38.19 | 4.00  | 1.00      | 2.00      | 2.00           | 1.00    | 1.00         | 0.00   | 1.00   | 5.00         | 24.29      | 1.00   | 32.00         | 1.00      | 9.00       | 0.00    | 13.00      | 52.00         | 0.00       |
| 835.00  | 30.00 | 63.00  | 158.00 | 25.24 | 3.00  | 1.00      | 1.00      | 2.00           | 0.00    | 0.00         | 0.00   | 3.00   | 5.00         | 51.43      | 1.00   | 39.00         | 1.00      | 3.00       | 1.00    | 17.00      | 68.00         | 0.00       |
| 836.00  | 29.00 | 70.00  | 158.00 | 28.04 | 3.00  | 1.00      | 2.00      | 1.00           | 0.00    | 0.00         | 0.00   | 2.00   | 6.00         | 0.00       | 1.00   | 29.00         | 0.00      | 8.00       | 0.00    | 7.00       | 28.00         | 1.00       |
| 837.00  | 30.00 | 75.00  | 169.00 | 26.26 | 3.00  | 1.00      | 2.00      | 2.00           | 0.00    | 1.00         | 0.00   | 2.00   | 7.00         | 0.00       | 1.00   | 27.00         | 0.00      | 2.00       | 1.00    | 12.00      | 48.00         | 1.00       |
| 838.00  | 33.00 | 80.00  | 170.00 | 27.68 | 3.00  | 1.00      | 2.00      | 2.00           | 0.00    | 0.00         | 0.00   | 2.00   | 3.00         | 0.00       | 1.00   | 28.00         | 0.00      | 88.34      | 0.00    | 17.00      | 68.00         | 0.00       |
| 839.00  | 30.00 | 70.00  | 163.00 | 26.35 | 3.00  | 1.00      | 2.00      | 2.00           | 0.00    | 0.00         | 0.00   | 2.00   | 4.00         | 0.00       | 1.00   | 25.00         | 0.00      | 6.00       | 0.00    | 12.00      | 48.00         | 1.00       |
| 840.00  | 32.00 | 72.00  | 169.00 | 25.21 | 3.00  | 1.00      | 2.00      | 2.00           | 0.00    | 0.00         | 0.00   | 3.00   | 1.50         | 5.71       | 1.00   | 32.00         | 1.00      | 9.00       | 0.00    | 19.00      | 76.00         | 0.00       |
| 841.00  | 32.00 | 74.00  | 171.00 | 25.31 | 3.00  | 1.00      | 2.00      | 2.00           | 1.00    | 0.00         | 0.00   | 3.00   | 7.00         | 4.29       | 1.00   | 25.00         | 0.00      | 4.00       | 1.00    | 14.00      | 56.00         | 0.00       |
| 842.00  | 29.00 | 67.00  | 160.00 | 26.17 | 3.00  | 1.00      | 2.00      | 2.00           | 1.00    | 0.00         | 0.00   | 3.00   | 5.00         | 17.14      | 1.00   | 34.00         | 1.00      | 2.00       | 1.00    | 17.00      | 68.00         | 0.00       |
| 843.00  | 29.00 | 80.00  | 165.00 | 29.38 | 3.00  | 1.00      | 2.00      | 2.00           | 0.00    | 1.00         | 0.00   | 3.00   | 6.00         | 2.14       | 1.00   | 30.00         | 1.00      | 5.00       | 1.00    | 11.00      | 44.00         | 1.00       |
| 844.00  | 26.00 | 65.00  | 164.00 | 24.17 | 2.00  | 1.00      | 1.00      | 2.00           | 0.00    | 0.00         | 0.00   | 2.00   | 5.00         | 8.57       | 1.00   | 21.00         | 0.00      | 7.00       | 0.00    | 9.00       | 36.00         | 1.00       |
| 845.00  | 25.00 | 62.00  | 159.00 | 24.52 | 2.00  | 0.00      | 1.00      | 1.00           | 1.00    | 0.00         | 0.00   | 2.00   | 2.50         | 0.00       | 1.00   | 27.00         | 0.00      | 12.00      | 0.00    | 9.00       | 36.00         | 1.00       |
| 846.00  | 30.00 | 63.00  | 159.00 | 24.92 | 2.00  | 1.00      | 1.00      | 2.00           | 0.00    | 0.00         | 0.00   | 2.00   | 7.00         | 2.14       | 1.00   | 26.00         | 0.00      | 5.00       | 1.00    | 15.00      | 60.00         | 0.00       |
| 847.00  | 30.00 | 60.00  | 165.00 | 22.04 | 2.00  | 1.00      | 1.00      | 2.00           | 1.00    | 0.00         | 0.00   | 3.     |              |            |        |               |           |            |         |            |               |            |

| Subject | Age   | Weight | Height | BMI   | BMI_C | Residence | Education | Marital_Status | Smoking | Chronic_Dise | Gender | Health | Sitting_Time | PA_Min_Day | IPAQ_C | Dietary_Score | Dietary_C | PSQI_Total | Sleep_C | WHO5_Total | WHO5_Total100 | WHO5_Class |
|---------|-------|--------|--------|-------|-------|-----------|-----------|----------------|---------|--------------|--------|--------|--------------|------------|--------|---------------|-----------|------------|---------|------------|---------------|------------|
| 859.00  | 30.00 | 95.00  | 179.00 | 29.65 | 3.00  | 0.00      | 2.00      | 2.00           | 0.00    | 0.00         | 1.00   | 3.00   | 10.00        | 0.00       | 1.00   | 27.00         | 0.00      | 3.00       | 1.00    | 14.00      | 56.00         | 0.00       |
| 860.00  | 30.00 | 75.00  | 160.00 | 29.30 | 3.00  | 1.00      | 2.00      | 2.00           | 0.00    | 0.00         | 0.00   | 3.00   | 8.00         | 0.00       | 1.00   | 25.00         | 0.00      | 4.00       | 1.00    | 13.00      | 52.00         | 0.00       |
| 861.00  | 26.00 | 87.00  | 190.00 | 24.10 | 2.00  | 1.00      | 2.00      | 1.00           | 0.00    | 0.00         | 0.00   | 3.00   | 8.00         | 25.71      | 1.00   | 18.00         | 0.00      | 6.00       | 0.00    | 9.00       | 36.00         | 1.00       |
| 862.00  | 33.00 | 65.00  | 163.00 | 24.46 | 2.00  | 1.00      | 2.00      | 2.00           | 1.00    | 0.00         | 0.00   | 3.00   | 4.00         | 38.57      | 1.00   | 23.00         | 0.00      | 5.00       | 1.00    | 16.00      | 64.00         | 0.00       |
| 863.00  | 28.00 | 92.00  | 175.00 | 30.04 | 4.00  | 1.00      | 2.00      | 3.00           | 0.00    | 0.00         | 1.00   | 3.00   | 7.00         | 25.71      | 1.00   | 24.00         | 0.00      | 1.00       | 1.00    | 13.00      | 52.00         | 0.00       |
| 864.00  | 27.00 | 90.00  | 167.00 | 32.27 | 4.00  | 1.00      | 3.00      | 1.00           | 0.00    | 0.00         | 0.00   | 2.00   | 8.00         | 0.00       | 1.00   | 29.00         | 0.00      | 4.00       | 1.00    | 12.00      | 48.00         | 1.00       |
| 865.00  | 24.00 | 70.00  | 160.00 | 27.34 | 3.00  | 1.00      | 2.00      | 1.00           | 1.00    | 0.00         | 0.00   | 3.00   | 6.00         | 38.57      | 1.00   | 23.00         | 0.00      | 9.00       | 0.00    | 9.00       | 36.00         | 1.00       |
| 866.00  | 29.00 | 80.00  | 176.00 | 25.83 | 3.00  | 1.00      | 2.00      | 2.00           | 0.00    | 0.00         | 1.00   | 3.00   | 8.00         | 12.86      | 1.00   | 29.00         | 0.00      | 4.00       | 1.00    | 15.00      | 60.00         | 0.00       |
| 867.00  | 29.00 | 85.00  | 175.00 | 27.76 | 3.00  | 1.00      | 2.00      | 2.00           | 0.00    | 0.00         | 1.00   | 3.00   | 12.00        | 14.86      | 1.00   | 39.00         | 1.00      | 4.00       | 1.00    | 20.00      | 80.00         | 0.00       |
| 868.00  | 31.00 | 84.00  | 171.00 | 28.73 | 3.00  | 1.00      | 2.00      | 2.00           | 0.00    | 0.00         | 0.00   | 3.00   | 4.00         | 34.29      | 1.00   | 32.00         | 1.00      | 3.00       | 1.00    | 21.00      | 84.00         | 0.00       |
| 869.00  | 31.00 | 85.00  | 170.00 | 29.41 | 3.00  | 1.00      | 2.00      | 1.00           | 1.00    | 1.00         | 1.00   | 2.00   | 8.00         | 0.00       | 1.00   | 21.00         | 0.00      | 10.00      | 0.00    | 15.00      | 60.00         | 0.00       |
| 870.00  | 30.00 | 65.00  | 159.00 | 25.71 | 3.00  | 1.00      | 3.00      | 2.00           | 0.00    | 0.00         | 0.00   | 3.00   | 4.00         | 0.00       | 1.00   | 31.00         | 1.00      | 2.00       | 1.00    | 13.00      | 52.00         | 0.00       |
| 871.00  | 29.00 | 66.00  | 160.00 | 25.78 | 3.00  | 1.00      | 3.00      | 2.00           | 0.00    | 0.00         | 0.00   | 3.00   | 2.00         | 5.71       | 1.00   | 28.00         | 0.00      | 1.00       | 1.00    | 18.00      | 72.00         | 0.00       |
| 872.00  | 28.00 | 60.00  | 158.00 | 24.03 | 2.00  | 1.00      | 2.00      | 2.00           | 0.00    | 0.00         | 0.00   | 3.00   | 4.00         | 7.14       | 1.00   | 39.00         | 1.00      | 10.00      | 0.00    | 12.00      | 48.00         | 1.00       |
| 873.00  | 29.00 | 76.00  | 177.00 | 24.26 | 2.00  | 1.00      | 2.00      | 1.00           | 0.00    | 0.00         | 1.00   | 3.00   | 4.00         | 15.71      | 1.00   | 20.00         | 0.00      | 5.00       | 1.00    | 15.00      | 60.00         | 0.00       |
| 874.00  | 29.00 | 52.00  | 167.00 | 18.65 | 2.00  | 1.00      | 2.00      | 2.00           | 0.00    | 0.00         | 0.00   | 3.00   | 3.50         | 0.00       | 1.00   | 27.00         | 0.00      | 5.00       | 1.00    | 12.00      | 48.00         | 1.00       |
| 875.00  | 27.00 | 89.00  | 191.00 | 24.40 | 2.00  | 1.00      | 2.00      | 1.00           | 0.00    | 0.00         | 1.00   | 3.00   | 9.00         | 21.43      | 1.00   | 26.00         | 0.00      | 5.00       | 1.00    | 17.00      | 68.00         | 0.00       |
| 876.00  | 27.00 | 56.00  | 156.00 | 23.01 | 2.00  | 1.00      | 2.00      | 2.00           | 0.00    | 0.00         | 0.00   | 3.00   | 2.50         | 10.71      | 1.00   | 26.00         | 0.00      | 3.00       | 1.00    | 16.00      | 64.00         | 0.00       |
| 877.00  | 30.00 | 80.00  | 179.00 | 24.97 | 2.00  | 1.00      | 2.00      | 3.00           | 1.00    | 1.00         | 1.00   | 1.00   | 10.00        | 17.14      | 1.00   | 27.00         | 0.00      | 9.00       | 0.00    | 17.00      | 68.00         | 0.00       |
| 878.00  | 29.00 | 60.00  | 163.00 | 22.58 | 2.00  | 1.00      | 3.00      | 1.00           | 0.00    | 0.00         | 0.00   | 2.00   | 6.50         | 37.14      | 1.00   | 22.00         | 0.00      | 9.00       | 0.00    | 12.00      | 48.00         | 1.00       |
| 879.00  | 27.00 | 79.00  | 178.00 | 24.93 | 2.00  | 1.00      | 3.00      | 1.00           | 0.00    | 0.00         | 1.00   | 3.00   | 3.00         | 5.71       | 1.00   | 33.00         | 1.00      | 4.00       | 1.00    | 17.00      | 68.00         | 0.00       |
| 880.00  | 31.00 | 60.00  | 160.00 | 23.44 | 2.00  | 1.00      | 3.00      | 1.00           | 1.00    | 0.00         | 1.00   | 3.00   | 6.00         | 51.43      | 1.00   | 28.00         | 0.00      | 4.00       | 1.00    | 13.00      | 52.00         | 0.00       |
| 881.00  | 32.00 | 100.00 | 178.00 | 31.56 | 4.00  | 1.00      | 2.00      | 1.00           | 1.00    | 0.00         | 1.00   | 3.00   | 11.00        | 15.00      | 1.00   | 26.00         | 0.00      | 5.00       | 1.00    | 15.00      | 60.00         | 0.00       |
| 882.00  | 33.00 | 88.00  | 178.00 | 27.77 | 3.00  | 1.00      | 1.00      | 2.00           | 0.00    | 0.00         | 1.00   | 3.00   | 11.00        | 0.00       | 1.00   | 29.00         | 0.00      | 3.00       | 1.00    | 15.00      | 60.00         | 0.00       |
| 883.00  | 32.00 | 85.00  | 178.00 | 26.83 | 3.00  | 1.00      | 2.00      | 1.00           | 1.00    | 1.00         | 1.00   | 2.00   | 5.00         | 8.57       | 1.00   | 19.00         | 0.00      | 10.00      | 0.00    | 7.00       | 28.00         | 1.00       |
| 884.00  | 28.00 | 66.00  | 158.00 | 26.44 | 3.00  | 1.00      | 2.00      | 1.00           | 0.00    | 0.00         | 0.00   | 2.00   | 8.00         | 17.14      | 1.00   | 29.00         | 0.00      | 6.00       | 0.00    | 12.00      | 48.00         | 1.00       |
| 885.00  | 28.00 | 75.00  | 170.00 | 25.95 | 3.00  | 0.00      | 2.00      | 2.00           | 0.00    | 0.00         | 1.00   | 3.00   | 2.50         | 15.00      | 1.00   | 21.00         | 0.00      | 3.00       | 1.00    | 9.00       | 36.00         | 1.00       |
| 886.00  | 27.00 | 86.00  | 170.00 | 29.76 | 3.00  | 1.00      | 2.00      | 1.00           | 0.00    | 0.00         | 1.00   | 3.00   | 5.50         | 25.71      | 1.00   | 31.00         | 1.00      | 5.00       | 1.00    | 9.00       | 36.00         | 1.00       |
| 887.00  | 24.00 | 83.00  | 176.00 | 26.79 | 3.00  | 0.00      | 2.00      | 1.00           | 0.00    | 0.00         | 1.00   | 3.00   | 4.00         | 51.43      | 1.00   | 30.00         | 1.00      | 7.00       | 0.00    | 14.00      | 56.00         | 0.00       |
| 888.00  | 32.00 | 66.00  | 160.00 | 25.78 | 3.00  | 1.00      | 2.00      | 2.00           | 0.00    | 0.00         | 0.00   | 3.00   | 6.00         | 2.14       | 1.00   | 37.00         | 1.00      | 8.00       | 0.00    | 13.00      | 52.00         | 0.00       |
| 889.00  | 33.00 | 90.00  | 180.00 | 27.78 | 3.00  | 1.00      | 2.00      | 2.00           | 1.00    | 1.00         | 1.00   | 1.00   | 7.00         | 2.14       | 1.00   | 18.00         | 0.00      | 9.00       | 0.00    | 6.00       | 24.00         | 1.00       |
| 890.00  | 25.00 | 84.00  | 171.00 | 28.73 | 3.00  | 1.00      | 2.00      | 2.00           | 1.00    | 1.00         | 1.00   | 2.00   | 7.00         | 34.29      | 1.00   | 32.00         | 1.00      | 3.00       | 1.00    | 13.00      | 52.00         | 0.00       |
| 891.00  | 27.00 | 53.00  | 168.00 | 18.78 | 2.00  | 1.00      | 1.00      | 1.00           | 0.00    | 0.00         | 0.00   | 1.00   | 5.50         | 2.14       | 1.00   | 19.00         | 0.00      | 5.00       | 1.00    | 10.00      | 40.00         | 1.00       |
| 892.00  | 32.00 | 70.00  | 168.00 | 24.80 | 2.00  | 0.00      | 1.00      | 2.00           | 1.00    | 1.00         | 1.00   | 3.00   | 6.00         | 15.71      | 1.00   | 30.00         | 1.00      | 11.00      | 0.00    | 10.00      | 40.00         | 1.00       |
| 893.00  | 31.00 | 63.00  | 173.00 | 21.05 | 2.00  | 0.00      | 2.00      | 1.00           | 0.00    | 0.00         | 1.00   | 2.00   | 7.00         | 0.00       | 1.00   | 22.00         | 0.00      | 3.00       | 1.00    | 9.00       | 36.00         | 1.00       |
| 894.00  | 28.00 | 69.00  | 169.00 | 24.16 | 2.00  | 1.00      | 2.00      | 2.00           | 1.00    | 0.00         | 1.00   | 3.00   | 8.00         | 0.00       | 1.00   | 20.00         | 0.00      | 9.00       | 0.00    | 13.00      | 52.00         | 0.00       |
| 895.00  | 31.00 | 65.00  | 166.00 | 23.59 | 2.00  | 1.00      | 2.00      | 2.00           | 1.00    | 0.00         | 0.00   | 3.00   | 5.00         | 0.00       | 1.00   | 24.00         | 0.00      | 1.00       | 1.00    | 17.00      | 68.00         | 0.00       |
| 896.00  | 33.00 | 58.00  | 159.00 | 22.94 | 2.00  | 1.00      | 2.00      | 2.00           | 0.00    | 0.00         | 0.00   | 2.00   | 10.00        | 0.00       | 1.00   | 24.00         | 0.00      | 9.00       | 0.00    | 15.00      | 60.00         | 0.00       |
| 897.00  | 31.00 | 63.00  | 162.00 | 24.01 | 2.00  | 1.00      | 2.00      | 2.00           | 1.00    | 0.00         | 0.00   | 2.00   | 6.00         | 55.71      | 1.00   | 34.00         | 1.00      | 1.00       | 1.00    | 12.00      | 48.00         | 1.00       |
| 898.00  | 31.00 | 75.00  | 176.00 | 24.21 | 2.00  | 1.00      | 2.00      | 2.00           | 0.00    | 0.00         | 0.00   | 3.00   | 5.50         | 55.71      | 1.00   | 25.00         | 0.00      | 8.00       | 0.00    | 10.00      | 40.00         | 1.00       |
| 899.00  | 27.00 | 68.00  | 175.00 | 22.20 | 2.00  | 1.00      | 2.00      | 3.00           | 0.00    | 0.00         | 1.00   | 3.00   | 1.50         | 17.14      | 1.00   | 25.00         | 0.00      | 5.00       | 1.00    | 8.00       | 32.00         | 1.00       |
| 900.00  | 25.00 | 75.00  | 175.00 | 24.49 | 2.00  | 1.00      | 2.00      | 1.00           | 0.00    | 0.00         | 1.00   | 3.00   | 9.00         | 24.29      | 1.00   | 33.00         | 1.00      | 6.00       | 0.00    | 15.00      | 60.00         | 0.00       |
| 901.00  | 28.00 | 52.00  | 164.00 | 19.33 | 2.00  | 0.00      | 2.00      | 1.00           | 1.00    | 0.00         | 1.00   | 3.00   | 2.50         | 35.71      | 1.00   | 19.00         | 0.00      | 3.00       | 1.00    | 14.00      | 56.00         | 0.00       |
| 902.00  | 33.00 | 53.00  | 153.00 | 22.64 | 2.00  | 1.00      | 2.00      | 2.00           | 0.00    | 0.00         | 0.00   | 3.00   | 3.50         | 0.00       | 1.00   | 21.00         | 0.00      | 6.00       | 0.00    | 16.00      | 64.00         | 0.00       |
| 903.00  | 33.00 | 68.00  | 169.00 | 23.81 | 2.00  | 1.00      | 2.00      | 1.00           | 1.00    | 1.00         | 0.00   | 2.00   | 6.50         | 0.00       | 1.00   | 22.00         | 0.00      | 6.00       | 0.00    | 12.00      | 48.00         | 1.00       |
| 904.00  | 29.00 | 60.00  | 170.00 | 20.76 | 2.00  | 1.00      | 2.00      | 1.00           | 1.00    | 1.00         | 1.00   | 2.00   | 8.00         | 7.14       | 1.00   | 30.00         | 1.00      | 2.00       | 1.00    | 15.00      | 60.00         | 0.00       |
| 905.00  | 33.00 | 58.00  | 155.00 | 24.14 | 2.00  | 1.00      | 3.00      | 2.00           | 0.00    | 0.00         | 0.00   | 3.00   | 8.00         | 10.00      | 1.00   | 33.00         | 1.00      | 3.00       | 1.00    | 14.00      | 56.00         | 0.00       |
| 906.00  | 33.00 | 59.00  | 156.00 | 24.24 | 2.00  | 0.00      | 3.00      | 1.00           | 0.00    | 1.00         | 0.00   | 2.00   | 4.00         | 7.86       | 1.00   | 30.00         | 1.00      | 7.00       | 0.00    | 15.00      | 60.00         | 0.00       |
| 907.00  | 24.00 | 55.00  | 175.00 | 17.96 | 1.00  | 0.00      | 2.00      | 1.00           | 1.00    | 0.00         | 1.00   | 3.00   | 4.50         | 0.00       | 1.00   | 24.00         | 0.00      | 2.00       | 1.00    | 16.00      | 64.00         | 0.00       |
| 908.00  | 27.00 | 51.00  | 163.00 | 19.20 | 2.00  | 1.00      | 2.00      | 1.00           | 0.00    | 0.00         | 0.00   | 2.00   | 3.50         | 25.71      | 1.00   | 32.00         | 1.00      | 1.00       | 1.00    | 17.00      | 68.00         | 0.00       |
| 909.00  | 25.00 | 53.00  | 159.00 | 20.96 | 2.00  | 1.00      | 2.00      | 1.00           | 1.00    | 0.00         | 0.00   | 2.00   | 6.00         | 8.57       | 1.00   | 27.00         | 0.00      | 3.00       | 1.00    | 16.00      | 64.00         | 0.00       |
| 910.00  | 25.00 | 57.00  | 158.00 | 22.83 | 2.00  | 1.00      | 2.00      | 2.00           | 0.00    | 0.00         | 0.00   | 3.00   | 10.00        | 4.29       | 1.00   | 24.00         | 0.00      | 3.00       | 1.00    | 10.00      | 40.00         | 1.00       |
| 911.00  | 30.00 | 60.00  | 165.00 | 22.04 | 2.00  | 1.00      | 2.00      | 2.00           | 0.00    | 0.00         | 0.00   | 3.00   | 5.00         | 68.57      | 1.00   | 29.00         | 0.00      | 7.00       | 0.00    | 12.00      | 48.00         | 1.00       |
| 912.00  | 26.00 | 54.00  | 163.00 | 20.32 | 2.00  | 1.00      | 3.00      | 1.00           | 0.00    | 0.00         | 0.00   | 3.00   | 3.50         | 47.14      | 1.00   | 34.00         | 1.00      | 10.00      | 0.00    | 15.00      | 60.00         | 0.00       |
| 913.00  | 33.00 | 92.00  | 173.00 | 30.74 | 4.00  | 1.00      | 3.00      | 2.00           | 0.00    | 0.00         | 1.00   |        |              |            |        |               |           |            |         |            |               |            |

| Subject | Age   | Weight | Height | BMI   | BMI_C | Residence | Education | Marital_Status | Smoking | Chronic_Dise | Gender | Health | Sitting_Time | PA_Min_Day | IPAQ_C | Dietary_Score | Dietary_C | PSQI_Total | Sleep_C | WHO5_Total | WHO5_Total100 | WHO5_Class |
|---------|-------|--------|--------|-------|-------|-----------|-----------|----------------|---------|--------------|--------|--------|--------------|------------|--------|---------------|-----------|------------|---------|------------|---------------|------------|
| 925.00  | 31.00 | 55.00  | 178.00 | 17.36 | 1.00  | 0.00      | 3.00      | 2.00           | 0.00    | 0.00         | 0.00   | 1.00   | 5.00         | 4.29       | 1.00   | 24.00         | 0.00      | 3.00       | 1.00    | 9.00       | 36.00         | 1.00       |
| 926.00  | 27.00 | 85.00  | 163.00 | 31.99 | 4.00  | 1.00      | 1.00      | 2.00           | 0.00    | 0.00         | 0.00   | 3.00   | 6.00         | 0.00       | 1.00   | 23.00         | 0.00      | 8.00       | 0.00    | 8.00       | 32.00         | 1.00       |
| 927.00  | 31.00 | 87.00  | 169.00 | 30.46 | 4.00  | 1.00      | 1.00      | 2.00           | 1.00    | 1.00         | 0.00   | 1.00   | 9.00         | 12.86      | 1.00   | 29.00         | 0.00      | 9.00       | 0.00    | 18.00      | 72.00         | 0.00       |
| 928.00  | 25.00 | 65.00  | 160.00 | 25.39 | 3.00  | 0.00      | 1.00      | 1.00           | 0.00    | 0.00         | 0.00   | 1.00   | 6.00         | 17.14      | 1.00   | 26.00         | 0.00      | 3.00       | 1.00    | 10.00      | 40.00         | 1.00       |
| 929.00  | 30.00 | 81.00  | 176.00 | 26.15 | 3.00  | 1.00      | 1.00      | 1.00           | 0.00    | 0.00         | 1.00   | 3.00   | 10.00        | 22.86      | 1.00   | 13.00         | 0.00      | 6.00       | 0.00    | 6.00       | 24.00         | 1.00       |
| 930.00  | 24.00 | 65.00  | 160.00 | 25.39 | 3.00  | 1.00      | 1.00      | 2.00           | 0.00    | 0.00         | 1.00   | 3.00   | 8.00         | 12.86      | 1.00   | 27.00         | 0.00      | 7.00       | 0.00    | 14.00      | 56.00         | 0.00       |
| 931.00  | 28.00 | 72.00  | 165.00 | 26.45 | 3.00  | 1.00      | 1.00      | 1.00           | 0.00    | 0.00         | 1.00   | 3.00   | 8.00         | 35.00      | 1.00   | 27.00         | 0.00      | 6.00       | 0.00    | 14.00      | 56.00         | 0.00       |
| 932.00  | 26.00 | 95.00  | 184.00 | 28.06 | 3.00  | 1.00      | 1.00      | 1.00           | 0.00    | 0.00         | 1.00   | 3.00   | 7.00         | 45.00      | 1.00   | 39.00         | 1.00      | 1.00       | 1.00    | 17.00      | 68.00         | 0.00       |
| 933.00  | 26.00 | 68.00  | 164.00 | 25.28 | 3.00  | 0.00      | 1.00      | 2.00           | 0.00    | 0.00         | 0.00   | 3.00   | 7.00         | 21.43      | 1.00   | 25.00         | 0.00      | 5.00       | 1.00    | 17.00      | 68.00         | 0.00       |
| 934.00  | 24.00 | 80.00  | 176.00 | 25.83 | 3.00  | 0.00      | 1.00      | 2.00           | 1.00    | 1.00         | 1.00   | 1.00   | 8.00         | 8.57       | 1.00   | 28.00         | 0.00      | 10.00      | 0.00    | 13.00      | 52.00         | 0.00       |
| 935.00  | 29.00 | 70.00  | 160.00 | 27.34 | 3.00  | 0.00      | 2.00      | 2.00           | 0.00    | 0.00         | 0.00   | 2.00   | 5.00         | 19.29      | 1.00   | 25.00         | 0.00      | 8.00       | 0.00    | 7.00       | 28.00         | 1.00       |
| 936.00  | 24.00 | 78.00  | 176.00 | 25.18 | 3.00  | 0.00      | 2.00      | 1.00           | 1.00    | 0.00         | 1.00   | 3.00   | 6.00         | 21.43      | 1.00   | 23.00         | 0.00      | 9.00       | 0.00    | 9.00       | 36.00         | 1.00       |
| 937.00  | 25.00 | 66.00  | 160.00 | 25.78 | 3.00  | 1.00      | 2.00      | 1.00           | 0.00    | 0.00         | 0.00   | 3.00   | 3.50         | 22.86      | 1.00   | 29.00         | 0.00      | 3.00       | 1.00    | 17.00      | 68.00         | 0.00       |
| 938.00  | 28.00 | 90.00  | 177.00 | 28.73 | 3.00  | 1.00      | 3.00      | 1.00           | 0.00    | 0.00         | 1.00   | 3.00   | 6.00         | 60.00      | 1.00   | 23.00         | 0.00      | 2.00       | 1.00    | 21.00      | 84.00         | 0.00       |
| 939.00  | 29.00 | 58.00  | 159.00 | 22.94 | 2.00  | 1.00      | 1.00      | 2.00           | 0.00    | 0.00         | 0.00   | 1.00   | 10.00        | 0.00       | 1.00   | 20.00         | 0.00      | 6.00       | 0.00    | 21.00      | 84.00         | 0.00       |
| 940.00  | 25.00 | 52.00  | 164.00 | 19.33 | 2.00  | 1.00      | 1.00      | 1.00           | 0.00    | 0.00         | 0.00   | 2.00   | 6.00         | 4.29       | 1.00   | 27.00         | 0.00      | 4.00       | 1.00    | 14.00      | 56.00         | 0.00       |
| 941.00  | 31.00 | 68.00  | 174.00 | 22.46 | 2.00  | 1.00      | 1.00      | 2.00           | 0.00    | 0.00         | 0.00   | 3.00   | 2.00         | 25.71      | 1.00   | 31.00         | 1.00      | 6.00       | 0.00    | 5.00       | 20.00         | 1.00       |
| 942.00  | 30.00 | 55.00  | 160.00 | 21.48 | 2.00  | 1.00      | 1.00      | 2.00           | 0.00    | 0.00         | 0.00   | 3.00   | 7.00         | 10.00      | 1.00   | 28.00         | 0.00      | 8.00       | 0.00    | 11.00      | 44.00         | 1.00       |
| 943.00  | 32.00 | 53.00  | 169.00 | 18.56 | 2.00  | 1.00      | 1.00      | 2.00           | 0.00    | 0.00         | 0.00   | 3.00   | 3.50         | 15.00      | 1.00   | 30.00         | 1.00      | 6.00       | 0.00    | 9.00       | 36.00         | 1.00       |
| 944.00  | 27.00 | 63.00  | 165.00 | 23.14 | 2.00  | 1.00      | 1.00      | 2.00           | 0.00    | 0.00         | 0.00   | 3.00   | 1.00         | 21.43      | 1.00   | 38.00         | 1.00      | 9.00       | 0.00    | 15.00      | 60.00         | 0.00       |
| 945.00  | 24.00 | 78.00  | 181.00 | 23.81 | 2.00  | 1.00      | 1.00      | 1.00           | 0.00    | 0.00         | 1.00   | 3.00   | 5.00         | 22.86      | 1.00   | 31.00         | 1.00      | 9.00       | 0.00    | 14.00      | 56.00         | 0.00       |
| 946.00  | 28.00 | 75.00  | 174.00 | 24.77 | 2.00  | 1.00      | 1.00      | 1.00           | 0.00    | 0.00         | 1.00   | 3.00   | 7.00         | 18.57      | 1.00   | 29.00         | 0.00      | 1.00       | 1.00    | 21.00      | 84.00         | 0.00       |
| 947.00  | 24.00 | 54.00  | 164.00 | 20.08 | 2.00  | 0.00      | 1.00      | 1.00           | 0.00    | 0.00         | 1.00   | 3.00   | 3.00         | 20.00      | 1.00   | 27.00         | 0.00      | 7.00       | 0.00    | 13.00      | 52.00         | 0.00       |
| 948.00  | 26.00 | 58.00  | 170.00 | 20.07 | 2.00  | 1.00      | 1.00      | 2.00           | 0.00    | 0.00         | 0.00   | 3.00   | 3.00         | 25.71      | 1.00   | 35.00         | 1.00      | 3.00       | 1.00    | 15.00      | 60.00         | 0.00       |
| 949.00  | 25.00 | 70.00  | 170.00 | 24.22 | 2.00  | 0.00      | 1.00      | 1.00           | 1.00    | 1.00         | 1.00   | 1.00   | 4.50         | 35.00      | 1.00   | 31.00         | 1.00      | 6.00       | 0.00    | 13.00      | 52.00         | 0.00       |
| 950.00  | 25.00 | 61.00  | 160.00 | 23.83 | 2.00  | 1.00      | 1.00      | 1.00           | 0.00    | 1.00         | 0.00   | 3.00   | 6.50         | 0.00       | 1.00   | 29.00         | 0.00      | 8.00       | 0.00    | 12.00      | 48.00         | 1.00       |
| 951.00  | 24.00 | 64.00  | 164.00 | 23.80 | 2.00  | 1.00      | 1.00      | 1.00           | 0.00    | 1.00         | 0.00   | 3.00   | 10.00        | 1.43       | 1.00   | 36.00         | 1.00      | 5.00       | 1.00    | 14.00      | 56.00         | 0.00       |
| 952.00  | 24.00 | 50.00  | 160.00 | 19.53 | 2.00  | 1.00      | 2.00      | 1.00           | 1.00    | 0.00         | 0.00   | 2.00   | 9.00         | 35.71      | 1.00   | 25.00         | 0.00      | 5.00       | 1.00    | 4.00       | 16.00         | 1.00       |
| 953.00  | 24.00 | 58.00  | 172.00 | 19.61 | 2.00  | 1.00      | 2.00      | 1.00           | 0.00    | 0.00         | 1.00   | 1.00   | 11.00        | 54.29      | 1.00   | 20.00         | 0.00      | 4.00       | 1.00    | 6.00       | 24.00         | 1.00       |
| 954.00  | 25.00 | 60.00  | 168.00 | 21.26 | 2.00  | 0.00      | 2.00      | 1.00           | 0.00    | 0.00         | 1.00   | 1.00   | 6.50         | 51.43      | 1.00   | 22.00         | 0.00      | 7.00       | 0.00    | 9.00       | 36.00         | 1.00       |
| 955.00  | 27.00 | 70.00  | 172.00 | 23.66 | 2.00  | 1.00      | 2.00      | 1.00           | 0.00    | 0.00         | 1.00   | 3.00   | 6.00         | 21.43      | 1.00   | 32.00         | 1.00      | 6.00       | 0.00    | 5.00       | 20.00         | 1.00       |
| 956.00  | 24.00 | 60.00  | 156.00 | 24.65 | 2.00  | 1.00      | 2.00      | 1.00           | 1.00    | 0.00         | 0.00   | 3.00   | 8.00         | 38.57      | 1.00   | 26.00         | 0.00      | 4.00       | 1.00    | 12.00      | 48.00         | 1.00       |
| 957.00  | 25.00 | 78.00  | 178.00 | 24.62 | 2.00  | 1.00      | 2.00      | 1.00           | 1.00    | 0.00         | 1.00   | 3.00   | 10.00        | 22.86      | 1.00   | 26.00         | 0.00      | 5.00       | 1.00    | 17.00      | 68.00         | 0.00       |
| 958.00  | 26.00 | 52.00  | 157.00 | 21.10 | 2.00  | 1.00      | 2.00      | 1.00           | 0.00    | 0.00         | 0.00   | 3.00   | 6.00         | 25.71      | 1.00   | 26.00         | 0.00      | 4.00       | 1.00    | 13.00      | 52.00         | 0.00       |
| 959.00  | 26.00 | 52.00  | 167.00 | 18.65 | 2.00  | 1.00      | 3.00      | 1.00           | 0.00    | 0.00         | 0.00   | 1.00   | 10.00        | 6.43       | 1.00   | 22.00         | 0.00      | 6.00       | 0.00    | 7.00       | 28.00         | 1.00       |
| 960.00  | 29.00 | 60.00  | 160.00 | 23.44 | 2.00  | 0.00      | 3.00      | 1.00           | 0.00    | 0.00         | 0.00   | 2.00   | 10.00        | 0.00       | 1.00   | 28.00         | 0.00      | 5.00       | 1.00    | 13.00      | 52.00         | 0.00       |
| 961.00  | 28.00 | 67.00  | 166.00 | 24.31 | 2.00  | 1.00      | 3.00      | 1.00           | 0.00    | 0.00         | 0.00   | 2.00   | 8.00         | 37.86      | 1.00   | 26.00         | 0.00      | 4.00       | 1.00    | 14.00      | 56.00         | 0.00       |
| 962.00  | 30.00 | 56.00  | 160.00 | 21.88 | 2.00  | 1.00      | 3.00      | 1.00           | 0.00    | 0.00         | 0.00   | 3.00   | 5.00         | 25.71      | 1.00   | 36.00         | 1.00      | 6.00       | 0.00    | 15.00      | 60.00         | 0.00       |
| 963.00  | 25.00 | 40.00  | 150.00 | 17.78 | 1.00  | 1.00      | 1.00      | 1.00           | 0.00    | 0.00         | 0.00   | 3.00   | 11.00        | 36.43      | 1.00   | 22.00         | 0.00      | 3.00       | 1.00    | 15.00      | 60.00         | 0.00       |
| 964.00  | 24.00 | 53.00  | 170.00 | 18.34 | 1.00  | 1.00      | 1.00      | 1.00           | 1.00    | 1.00         | 0.00   | 3.00   | 8.00         | 42.86      | 1.00   | 24.00         | 0.00      | 12.00      | 0.00    | 10.00      | 40.00         | 1.00       |
| 965.00  | 25.00 | 50.00  | 168.00 | 17.72 | 1.00  | 1.00      | 1.00      | 1.00           | 0.00    | 1.00         | 0.00   | 3.00   | 6.00         | 0.00       | 1.00   | 25.00         | 0.00      | 7.00       | 0.00    | 15.00      | 60.00         | 0.00       |
| 966.00  | 24.00 | 45.00  | 163.00 | 16.94 | 1.00  | 1.00      | 1.00      | 1.00           | 0.00    | 1.00         | 0.00   | 3.00   | 11.00        | 18.57      | 1.00   | 38.00         | 1.00      | 3.00       | 1.00    | 17.00      | 68.00         | 0.00       |
| 967.00  | 30.00 | 46.00  | 159.00 | 18.20 | 1.00  | 1.00      | 3.00      | 1.00           | 0.00    | 0.00         | 0.00   | 3.00   | 6.50         | 35.00      | 1.00   | 31.00         | 1.00      | 14.00      | 0.00    | 12.00      | 48.00         | 1.00       |
| 968.00  | 28.00 | 90.00  | 160.00 | 35.16 | 4.00  | 1.00      | 2.00      | 1.00           | 0.00    | 0.00         | 0.00   | 1.00   | 6.50         | 12.86      | 1.00   | 20.00         | 0.00      | 6.00       | 0.00    | 11.00      | 44.00         | 1.00       |
| 969.00  | 31.00 | 115.00 | 190.00 | 31.86 | 4.00  | 1.00      | 2.00      | 2.00           | 0.00    | 0.00         | 1.00   | 2.00   | 8.00         | 51.43      | 1.00   | 28.00         | 0.00      | 14.00      | 0.00    | 6.00       | 24.00         | 1.00       |
| 970.00  | 32.00 | 92.00  | 173.00 | 30.74 | 4.00  | 0.00      | 2.00      | 2.00           | 0.00    | 0.00         | 1.00   | 2.00   | 9.00         | 0.00       | 1.00   | 16.00         | 0.00      | 6.00       | 0.00    | 12.00      | 48.00         | 1.00       |
| 971.00  | 29.00 | 105.00 | 187.00 | 30.03 | 4.00  | 1.00      | 2.00      | 1.00           | 0.00    | 0.00         | 1.00   | 2.00   | 6.00         | 5.71       | 1.00   | 24.00         | 0.00      | 2.00       | 1.00    | 13.00      | 52.00         | 0.00       |
| 972.00  | 32.00 | 89.00  | 165.00 | 32.69 | 4.00  | 1.00      | 2.00      | 2.00           | 0.00    | 0.00         | 1.00   | 2.00   | 11.00        | 0.00       | 1.00   | 29.00         | 0.00      | 3.00       | 1.00    | 13.00      | 52.00         | 0.00       |
| 973.00  | 29.00 | 105.00 | 187.00 | 30.03 | 4.00  | 1.00      | 2.00      | 2.00           | 1.00    | 0.00         | 1.00   | 3.00   | 11.00        | 0.00       | 1.00   | 23.00         | 0.00      | 4.00       | 1.00    | 16.00      | 64.00         | 0.00       |
| 974.00  | 32.00 | 97.00  | 178.00 | 30.61 | 4.00  | 1.00      | 2.00      | 2.00           | 0.00    | 0.00         | 1.00   | 3.00   | 9.00         | 0.00       | 1.00   | 24.00         | 0.00      | 2.00       | 1.00    | 19.00      | 76.00         | 0.00       |
| 975.00  | 29.00 | 92.00  | 174.00 | 30.39 | 4.00  | 1.00      | 2.00      | 2.00           | 0.00    | 1.00         | 0.00   | 2.00   | 11.00        | 7.14       | 1.00   | 22.00         | 0.00      | 7.00       | 0.00    | 11.00      | 44.00         | 1.00       |
| 976.00  | 29.00 | 86.00  | 169.00 | 30.11 | 4.00  | 1.00      | 3.00      | 1.00           | 0.00    | 0.00         | 1.00   | 3.00   | 11.00        | 17.14      | 1.00   | 27.00         | 0.00      | 86.21      | 0.00    | 19.00      | 76.00         | 0.00       |
| 977.00  | 26.00 | 78.00  | 172.00 | 26.37 | 3.00  | 1.00      | 2.00      | 1.00           | 0.00    | 0.00         | 0.00   | 1.00   | 4.00         | 17.14      | 1.00   | 31.00         | 1.00      | 3.00       | 1.00    | 12.00      | 48.00         | 1.00       |
| 978.00  | 25.00 | 79.00  | 166.00 | 28.67 | 3.00  | 0.00      | 2.00      | 1.00           | 0.00    | 0.00         | 1.00   | 2.00   | 10.00        | 26.43      | 1.00   | 21.00         | 0.00      | 10.00      | 0.00    | 15.00      | 60.00         | 0.00       |
| 979.00  | 28.00 | 82.00  | 168.00 | 29.05 | 3.00  | 1.00      | 2.00      | 1.00           | 0.00    | 0.           |        |        |              |            |        |               |           |            |         |            |               |            |

| Subject | Age   | Weight | Height | BMI   | BMI_C | Residence | Education | Marital_Status | Smoking | Chronic_Dise | Gender | Health | Sitting_Time | PA_Min_Day | IPAQ_C | Dietary_Score | Dietary_C | PSQI_Total | Sleep_C | WHO5_Total | WHO5_Total100 | WHO5_Class |
|---------|-------|--------|--------|-------|-------|-----------|-----------|----------------|---------|--------------|--------|--------|--------------|------------|--------|---------------|-----------|------------|---------|------------|---------------|------------|
| 991.00  | 30.00 | 74.00  | 163.00 | 27.85 | 3.00  | 1.00      | 3.00      | 2.00           | 0.00    | 0.00         | 0.00   | 2.00   | 8.00         | 25.71      | 1.00   | 34.00         | 1.00      | 9.00       | 0.00    | 12.00      | 48.00         | 1.00       |
| 992.00  | 31.00 | 72.00  | 168.00 | 25.51 | 3.00  | 1.00      | 3.00      | 2.00           | 0.00    | 0.00         | 1.00   | 3.00   | 4.00         | 17.14      | 1.00   | 25.00         | 0.00      | 6.00       | 0.00    | 17.00      | 68.00         | 0.00       |
| 993.00  | 25.00 | 67.00  | 185.00 | 19.58 | 2.00  | 1.00      | 1.00      | 1.00           | 0.00    | 0.00         | 1.00   | 3.00   | 10.00        | 55.71      | 1.00   | 29.00         | 0.00      | 4.00       | 1.00    | 13.00      | 52.00         | 0.00       |
| 994.00  | 32.00 | 60.00  | 169.00 | 21.01 | 2.00  | 0.00      | 2.00      | 1.00           | 1.00    | 0.00         | 1.00   | 3.00   | 4.00         | 60.00      | 1.00   | 20.00         | 0.00      | 3.00       | 1.00    | 15.00      | 60.00         | 0.00       |
| 995.00  | 33.00 | 58.00  | 159.00 | 22.94 | 2.00  | 1.00      | 2.00      | 2.00           | 0.00    | 0.00         | 0.00   | 1.00   | 7.00         | 66.43      | 1.00   | 32.00         | 1.00      | 5.00       | 1.00    | 9.00       | 36.00         | 1.00       |
| 996.00  | 26.00 | 64.00  | 168.00 | 22.68 | 2.00  | 1.00      | 2.00      | 1.00           | 0.00    | 0.00         | 0.00   | 2.00   | 7.00         | 8.57       | 1.00   | 24.00         | 0.00      | 6.00       | 0.00    | 17.00      | 68.00         | 0.00       |
| 997.00  | 28.00 | 50.00  | 158.00 | 20.03 | 2.00  | 1.00      | 2.00      | 2.00           | 0.00    | 0.00         | 0.00   | 2.00   | 5.00         | 2.86       | 1.00   | 32.00         | 1.00      | 2.00       | 1.00    | 14.00      | 56.00         | 0.00       |
| 998.00  | 29.00 | 78.00  | 178.00 | 24.62 | 2.00  | 1.00      | 2.00      | 2.00           | 1.00    | 0.00         | 1.00   | 2.00   | 4.00         | 17.14      | 1.00   | 23.00         | 0.00      | 4.00       | 1.00    | 13.00      | 52.00         | 0.00       |
| 999.00  | 30.00 | 64.00  | 179.00 | 19.97 | 2.00  | 0.00      | 2.00      | 1.00           | 0.00    | 0.00         | 1.00   | 3.00   | 8.00         | 0.00       | 1.00   | 27.00         | 0.00      | 8.00       | 0.00    | 3.00       | 12.00         | 1.00       |
| 1000.00 | 28.00 | 80.00  | 179.00 | 24.97 | 2.00  | 1.00      | 2.00      | 1.00           | 0.00    | 0.00         | 1.00   | 3.00   | 10.00        | 8.57       | 1.00   | 21.00         | 0.00      | 9.00       | 0.00    | 8.00       | 32.00         | 1.00       |
| 1001.00 | 30.00 | 50.00  | 160.00 | 19.53 | 2.00  | 1.00      | 2.00      | 1.00           | 0.00    | 0.00         | 0.00   | 3.00   | 8.00         | 12.86      | 1.00   | 34.00         | 1.00      | 8.00       | 0.00    | 15.00      | 60.00         | 0.00       |
| 1002.00 | 25.00 | 52.00  | 160.00 | 20.31 | 2.00  | 1.00      | 2.00      | 2.00           | 1.00    | 0.00         | 0.00   | 3.00   | 2.00         | 8.57       | 1.00   | 23.00         | 0.00      | 6.00       | 0.00    | 15.00      | 60.00         | 0.00       |
| 1003.00 | 24.00 | 65.00  | 174.00 | 21.47 | 2.00  | 1.00      | 2.00      | 1.00           | 0.00    | 0.00         | 0.00   | 3.00   | 2.50         | 12.86      | 1.00   | 27.00         | 0.00      | 3.00       | 1.00    | 10.00      | 40.00         | 1.00       |
| 1004.00 | 28.00 | 55.00  | 162.00 | 20.96 | 2.00  | 0.00      | 2.00      | 2.00           | 0.00    | 0.00         | 0.00   | 3.00   | 7.00         | 27.14      | 1.00   | 33.00         | 1.00      | 5.00       | 1.00    | 14.00      | 56.00         | 0.00       |
| 1005.00 | 24.00 | 55.00  | 167.00 | 19.72 | 2.00  | 0.00      | 2.00      | 2.00           | 0.00    | 0.00         | 0.00   | 3.00   | 2.50         | 8.57       | 1.00   | 30.00         | 1.00      | 1.00       | 1.00    | 13.00      | 52.00         | 0.00       |
| 1006.00 | 25.00 | 66.00  | 183.00 | 19.71 | 2.00  | 1.00      | 2.00      | 1.00           | 1.00    | 0.00         | 1.00   | 3.00   | 6.00         | 4.29       | 1.00   | 34.00         | 1.00      | 4.00       | 1.00    | 15.00      | 60.00         | 0.00       |
| 1007.00 | 29.00 | 65.00  | 166.00 | 23.59 | 2.00  | 1.00      | 2.00      | 2.00           | 0.00    | 0.00         | 1.00   | 3.00   | 9.00         | 37.14      | 1.00   | 28.00         | 0.00      | 2.00       | 1.00    | 18.00      | 72.00         | 0.00       |
| 1008.00 | 30.00 | 75.00  | 176.00 | 24.21 | 2.00  | 1.00      | 2.00      | 2.00           | 0.00    | 0.00         | 1.00   | 3.00   | 4.00         | 4.29       | 1.00   | 27.00         | 0.00      | 2.00       | 1.00    | 18.00      | 72.00         | 0.00       |
| 1009.00 | 25.00 | 59.00  | 160.00 | 23.05 | 2.00  | 0.00      | 2.00      | 1.00           | 0.00    | 0.00         | 0.00   | 3.00   | 8.00         | 25.71      | 1.00   | 30.00         | 1.00      | 7.00       | 0.00    | 16.00      | 64.00         | 0.00       |
| 1010.00 | 32.00 | 65.00  | 178.00 | 20.52 | 2.00  | 1.00      | 2.00      | 2.00           | 1.00    | 0.00         | 1.00   | 3.00   | 10.00        | 8.57       | 1.00   | 25.00         | 0.00      | 11.00      | 0.00    | 13.00      | 52.00         | 0.00       |
| 1011.00 | 30.00 | 59.00  | 160.00 | 23.05 | 2.00  | 0.00      | 2.00      | 1.00           | 0.00    | 0.00         | 0.00   | 3.00   | 6.00         | 64.29      | 1.00   | 36.00         | 1.00      | 4.00       | 1.00    | 16.00      | 64.00         | 0.00       |
| 1012.00 | 31.00 | 64.00  | 165.00 | 23.51 | 2.00  | 0.00      | 2.00      | 2.00           | 0.00    | 0.00         | 1.00   | 3.00   | 1.50         | 21.43      | 1.00   | 35.00         | 1.00      | 0.00       | 1.00    | 22.00      | 88.00         | 0.00       |
| 1013.00 | 24.00 | 75.00  | 177.00 | 23.94 | 2.00  | 0.00      | 2.00      | 1.00           | 0.00    | 0.00         | 0.00   | 3.00   | 5.50         | 10.71      | 1.00   | 22.00         | 0.00      | 4.00       | 1.00    | 14.00      | 56.00         | 0.00       |
| 1014.00 | 25.00 | 66.00  | 183.00 | 19.71 | 2.00  | 1.00      | 2.00      | 1.00           | 0.00    | 1.00         | 1.00   | 2.00   | 9.00         | 29.29      | 1.00   | 29.00         | 0.00      | 8.00       | 0.00    | 2.00       | 8.00          | 1.00       |
| 1015.00 | 32.00 | 78.00  | 178.00 | 24.62 | 2.00  | 1.00      | 2.00      | 2.00           | 1.00    | 1.00         | 1.00   | 2.00   | 3.00         | 27.86      | 1.00   | 23.00         | 0.00      | 1.00       | 1.00    | 17.00      | 68.00         | 0.00       |
| 1016.00 | 33.00 | 60.00  | 158.00 | 24.03 | 2.00  | 1.00      | 3.00      | 2.00           | 0.00    | 0.00         | 0.00   | 2.00   | 5.00         | 0.00       | 1.00   | 24.00         | 0.00      | 5.00       | 1.00    | 11.00      | 44.00         | 1.00       |
| 1017.00 | 33.00 | 54.00  | 151.00 | 23.68 | 2.00  | 1.00      | 3.00      | 1.00           | 0.00    | 0.00         | 0.00   | 3.00   | 3.50         | 17.14      | 1.00   | 23.00         | 0.00      | 2.00       | 1.00    | 13.00      | 52.00         | 0.00       |
| 1018.00 | 28.00 | 53.00  | 156.00 | 21.78 | 2.00  | 0.00      | 3.00      | 2.00           | 0.00    | 0.00         | 0.00   | 3.00   | 9.00         | 8.57       | 1.00   | 27.00         | 0.00      | 4.00       | 1.00    | 15.00      | 60.00         | 0.00       |
| 1019.00 | 28.00 | 56.00  | 168.00 | 19.84 | 2.00  | 1.00      | 3.00      | 1.00           | 0.00    | 0.00         | 1.00   | 3.00   | 4.50         | 1.43       | 1.00   | 23.00         | 0.00      | 3.00       | 1.00    | 16.00      | 64.00         | 0.00       |
| 1020.00 | 27.00 | 62.00  | 173.00 | 20.72 | 2.00  | 1.00      | 3.00      | 1.00           | 0.00    | 0.00         | 1.00   | 3.00   | 8.00         | 22.86      | 1.00   | 21.00         | 0.00      | 3.00       | 1.00    | 15.00      | 60.00         | 0.00       |
| 1021.00 | 30.00 | 70.00  | 172.00 | 23.66 | 2.00  | 1.00      | 3.00      | 2.00           | 0.00    | 0.00         | 1.00   | 3.00   | 7.00         | 8.57       | 1.00   | 23.00         | 0.00      | 5.00       | 1.00    | 19.00      | 76.00         | 0.00       |
| 1022.00 | 33.00 | 70.00  | 169.00 | 24.51 | 2.00  | 1.00      | 3.00      | 2.00           | 0.00    | 1.00         | 1.00   | 2.00   | 9.00         | 19.29      | 1.00   | 20.00         | 0.00      | 4.00       | 1.00    | 16.00      | 64.00         | 0.00       |
| 1023.00 | 27.00 | 47.00  | 165.00 | 17.26 | 1.00  | 1.00      | 3.00      | 1.00           | 0.00    | 0.00         | 0.00   | 1.00   | 11.00        | 2.14       | 1.00   | 18.00         | 0.00      | 11.00      | 0.00    | 6.00       | 24.00         | 1.00       |
| 1024.00 | 30.00 | 80.00  | 160.00 | 31.25 | 4.00  | 1.00      | 2.00      | 2.00           | 0.00    | 0.00         | 0.00   | 2.00   | 4.00         | 0.00       | 1.00   | 20.00         | 0.00      | 5.00       | 1.00    | 12.00      | 48.00         | 1.00       |
| 1025.00 | 25.00 | 85.00  | 173.00 | 28.40 | 3.00  | 0.00      | 1.00      | 1.00           | 0.00    | 0.00         | 1.00   | 3.00   | 8.00         | 0.00       | 1.00   | 20.00         | 0.00      | 7.00       | 0.00    | 10.00      | 40.00         | 1.00       |
| 1026.00 | 31.00 | 69.00  | 163.00 | 25.97 | 3.00  | 1.00      | 2.00      | 2.00           | 0.00    | 0.00         | 0.00   | 2.00   | 9.00         | 2.86       | 1.00   | 23.00         | 0.00      | 5.00       | 1.00    | 11.00      | 44.00         | 1.00       |
| 1027.00 | 28.00 | 75.00  | 160.00 | 29.30 | 3.00  | 1.00      | 2.00      | 1.00           | 0.00    | 0.00         | 0.00   | 3.00   | 6.00         | 2.14       | 1.00   | 36.00         | 1.00      | 2.00       | 1.00    | 17.00      | 68.00         | 0.00       |
| 1028.00 | 26.00 | 62.00  | 169.00 | 21.71 | 2.00  | 1.00      | 1.00      | 1.00           | 0.00    | 0.00         | 0.00   | 2.00   | 6.00         | 0.00       | 1.00   | 22.00         | 0.00      | 7.00       | 0.00    | 8.00       | 32.00         | 1.00       |
| 1029.00 | 28.00 | 72.00  | 175.00 | 23.51 | 2.00  | 1.00      | 1.00      | 1.00           | 0.00    | 0.00         | 1.00   | 3.00   | 3.00         | 6.43       | 1.00   | 26.00         | 0.00      | 7.00       | 0.00    | 16.00      | 64.00         | 0.00       |
| 1030.00 | 29.00 | 57.00  | 162.00 | 21.72 | 2.00  | 0.00      | 2.00      | 1.00           | 0.00    | 0.00         | 0.00   | 3.00   | 8.00         | 1.43       | 1.00   | 17.00         | 0.00      | 6.00       | 0.00    | 16.00      | 64.00         | 0.00       |
| 1031.00 | 26.00 | 63.00  | 165.00 | 23.14 | 2.00  | 1.00      | 2.00      | 1.00           | 0.00    | 0.00         | 1.00   | 3.00   | 5.00         | 45.00      | 1.00   | 34.00         | 1.00      | 1.00       | 1.00    | 12.00      | 48.00         | 1.00       |
| 1032.00 | 29.00 | 60.00  | 159.00 | 23.73 | 2.00  | 1.00      | 2.00      | 2.00           | 1.00    | 1.00         | 0.00   | 3.00   | 2.50         | 30.00      | 1.00   | 26.00         | 0.00      | 9.00       | 0.00    | 14.00      | 56.00         | 0.00       |
| 1033.00 | 24.00 | 66.00  | 177.00 | 21.07 | 2.00  | 1.00      | 2.00      | 1.00           | 1.00    | 1.00         | 1.00   | 3.00   | 5.00         | 20.00      | 1.00   | 26.00         | 0.00      | 4.00       | 1.00    | 17.00      | 68.00         | 0.00       |
| 1034.00 | 25.00 | 58.00  | 174.00 | 19.16 | 2.00  | 1.00      | 3.00      | 1.00           | 0.00    | 0.00         | 0.00   | 1.00   | 11.00        | 0.00       | 1.00   | 20.00         | 0.00      | 3.00       | 1.00    | 14.00      | 56.00         | 0.00       |
| 1035.00 | 25.00 | 55.00  | 175.00 | 17.96 | 1.00  | 1.00      | 3.00      | 1.00           | 0.00    | 0.00         | 1.00   | 1.00   | 6.00         | 14.29      | 1.00   | 24.00         | 0.00      | 3.00       | 1.00    | 9.00       | 36.00         | 1.00       |
| 1036.00 | 39.00 | 85.00  | 180.00 | 26.23 | 3.00  | 0.00      | 1.00      | 2.00           | 0.00    | 0.00         | 1.00   | 3.00   | 7.00         | 31.86      | 1.00   | 31.00         | 1.00      | 4.00       | 1.00    | 10.00      | 40.00         | 1.00       |
| 1037.00 | 36.00 | 100.00 | 182.00 | 30.19 | 4.00  | 1.00      | 1.00      | 2.00           | 0.00    | 0.00         | 1.00   | 2.00   | 4.50         | 32.14      | 1.00   | 24.00         | 0.00      | 4.00       | 1.00    | 12.00      | 48.00         | 1.00       |
| 1038.00 | 39.00 | 125.00 | 190.00 | 34.63 | 4.00  | 1.00      | 2.00      | 1.00           | 1.00    | 0.00         | 1.00   | 3.00   | 3.50         | 36.43      | 1.00   | 32.00         | 1.00      | 1.00       | 1.00    | 17.00      | 68.00         | 0.00       |
| 1039.00 | 39.00 | 123.00 | 190.00 | 34.07 | 4.00  | 1.00      | 2.00      | 1.00           | 1.00    | 0.00         | 1.00   | 3.00   | 3.50         | 38.57      | 1.00   | 31.00         | 1.00      | 3.00       | 1.00    | 17.00      | 68.00         | 0.00       |
| 1040.00 | 43.00 | 105.00 | 187.00 | 30.03 | 4.00  | 1.00      | 3.00      | 2.00           | 0.00    | 0.00         | 1.00   | 2.00   | 5.00         | 5.71       | 1.00   | 26.00         | 0.00      | 2.00       | 1.00    | 15.00      | 60.00         | 0.00       |
| 1041.00 | 36.00 | 85.00  | 183.00 | 25.38 | 3.00  | 1.00      | 2.00      | 2.00           | 0.00    | 0.00         | 1.00   | 3.00   | 6.00         | 12.86      | 1.00   | 25.00         | 0.00      | 1.00       | 1.00    | 17.00      | 68.00         | 0.00       |
| 1042.00 | 40.00 | 84.00  | 173.00 | 28.07 | 3.00  | 1.00      | 2.00      | 2.00           | 1.00    | 1.00         | 1.00   | 1.00   | 2.00         | 51.43      | 1.00   | 35.00         | 1.00      | 0.00       | 1.00    | 14.00      | 56.00         | 0.00       |
| 1043.00 | 34.00 | 71.00  | 162.00 | 27.05 | 3.00  | 1.00      | 2.00      | 2.00           | 0.00    | 0.00         | 0.00   | 3.00   | 7.00         | 12.86      | 1.00   | 34.00         | 1.00      | 3.00       | 1.00    | 16.00      | 64.00         | 0.00       |
| 1044.00 | 40.00 | 80.00  | 178.00 | 25.25 | 3.00  | 1.00      | 2.00      | 2.00           | 1.00    | 0.00         | 1.00   | 3.00   | 4.00         | 34.29      | 1.00   | 31.00         | 1.00      | 4.00       | 1.00    | 12.00      | 48.00         | 1.00       |
| 1045.00 | 43.00 | 78.00  | 172.00 | 26.37 | 3.00  | 1.00      |           |                |         |              |        |        |              |            |        |               |           |            |         |            |               |            |



| Subject | Age   | Weight | Height | BMI   | BMI_C | Residence | Education | Marital_Status | Smoking | Chronic_Dise | Gender | Health | Sitting_Time | PA_Min_Day | IPAQ_C | Dietary_Score | Dietary_C | PSQI_Total | Sleep_C | WHO5_Total | WHO5_Total100 | WHO5_Class |
|---------|-------|--------|--------|-------|-------|-----------|-----------|----------------|---------|--------------|--------|--------|--------------|------------|--------|---------------|-----------|------------|---------|------------|---------------|------------|
| 1057.00 | 37.00 | 104.00 | 183.00 | 31.05 | 4.00  | 0.00      | 2.00      | 2.00           | 0.00    | 0.00         | 1.00   | 3.00   | 8.00         | 32.14      | 1.00   | 28.00         | 0.00      | 6.00       | 0.00    | 13.00      | 52.00         | 0.00       |
| 1058.00 | 34.00 | 105.00 | 170.00 | 36.33 | 4.00  | 1.00      | 2.00      | 2.00           | 0.00    | 0.00         | 1.00   | 2.00   | 9.00         | 0.00       | 1.00   | 24.00         | 0.00      | 3.00       | 1.00    | 13.00      | 52.00         | 0.00       |
| 1059.00 | 40.00 | 120.00 | 185.00 | 35.06 | 4.00  | 1.00      | 2.00      | 2.00           | 1.00    | 0.00         | 1.00   | 3.00   | 9.00         | 0.00       | 1.00   | 24.00         | 0.00      | 8.00       | 0.00    | 11.00      | 44.00         | 1.00       |
| 1060.00 | 35.00 | 100.00 | 177.00 | 31.92 | 4.00  | 1.00      | 2.00      | 2.00           | 1.00    | 0.00         | 1.00   | 3.00   | 2.50         | 57.86      | 1.00   | 27.00         | 0.00      | 10.00      | 0.00    | 11.00      | 44.00         | 1.00       |
| 1061.00 | 38.00 | 120.00 | 167.00 | 43.03 | 4.00  | 1.00      | 2.00      | 2.00           | 0.00    | 0.00         | 1.00   | 3.00   | 4.00         | 8.57       | 1.00   | 26.00         | 0.00      | 9.00       | 0.00    | 11.00      | 44.00         | 1.00       |
| 1062.00 | 36.00 | 95.00  | 175.00 | 31.02 | 4.00  | 1.00      | 2.00      | 2.00           | 0.00    | 0.00         | 1.00   | 3.00   | 4.00         | 17.14      | 1.00   | 27.00         | 0.00      | 7.00       | 0.00    | 17.00      | 68.00         | 0.00       |
| 1063.00 | 42.00 | 105.00 | 173.00 | 35.08 | 4.00  | 1.00      | 2.00      | 2.00           | 0.00    | 1.00         | 1.00   | 2.00   | 9.00         | 7.14       | 1.00   | 33.00         | 1.00      | 6.00       | 0.00    | 12.00      | 48.00         | 1.00       |
| 1064.00 | 36.00 | 90.00  | 169.00 | 31.51 | 4.00  | 1.00      | 2.00      | 2.00           | 1.00    | 1.00         | 1.00   | 2.00   | 10.00        | 4.29       | 1.00   | 40.00         | 1.00      | 3.00       | 1.00    | 13.00      | 52.00         | 0.00       |
| 1065.00 | 38.00 | 100.00 | 178.00 | 31.56 | 4.00  | 1.00      | 2.00      | 3.00           | 1.00    | 1.00         | 1.00   | 2.00   | 7.00         | 8.57       | 1.00   | 32.00         | 1.00      | 3.00       | 1.00    | 17.00      | 68.00         | 0.00       |
| 1066.00 | 36.00 | 90.00  | 171.00 | 30.78 | 4.00  | 1.00      | 2.00      | 2.00           | 0.00    | 1.00         | 1.00   | 3.00   | 4.00         | 41.71      | 1.00   | 34.00         | 1.00      | 6.00       | 0.00    | 19.00      | 76.00         | 0.00       |
| 1067.00 | 44.00 | 88.00  | 170.00 | 30.45 | 4.00  | 1.00      | 3.00      | 2.00           | 0.00    | 0.00         | 1.00   | 2.00   | 5.00         | 45.00      | 1.00   | 37.00         | 1.00      | 6.00       | 0.00    | 20.00      | 80.00         | 0.00       |
| 1068.00 | 42.00 | 120.00 | 183.00 | 35.83 | 4.00  | 1.00      | 3.00      | 2.00           | 1.00    | 0.00         | 1.00   | 2.00   | 11.00        | 0.00       | 1.00   | 31.00         | 1.00      | 4.00       | 1.00    | 12.00      | 48.00         | 1.00       |
| 1069.00 | 35.00 | 70.00  | 162.00 | 26.67 | 3.00  | 1.00      | 2.00      | 1.00           | 0.00    | 1.00         | 0.00   | 2.00   | 4.50         | 0.00       | 1.00   | 29.00         | 0.00      | 10.00      | 0.00    | 4.00       | 16.00         | 1.00       |
| 1070.00 | 35.00 | 90.00  | 178.00 | 28.41 | 3.00  | 1.00      | 2.00      | 2.00           | 1.00    | 0.00         | 1.00   | 1.00   | 5.50         | 0.00       | 1.00   | 22.00         | 0.00      | 8.00       | 0.00    | 3.00       | 12.00         | 1.00       |
| 1071.00 | 40.00 | 84.00  | 175.00 | 27.43 | 3.00  | 1.00      | 2.00      | 2.00           | 1.00    | 0.00         | 1.00   | 2.00   | 4.00         | 2.14       | 1.00   | 22.00         | 0.00      | 9.00       | 0.00    | 12.00      | 48.00         | 1.00       |
| 1072.00 | 40.00 | 78.00  | 176.00 | 25.18 | 3.00  | 1.00      | 2.00      | 2.00           | 1.00    | 0.00         | 1.00   | 3.00   | 9.00         | 54.29      | 1.00   | 22.00         | 0.00      | 4.00       | 1.00    | 15.00      | 60.00         | 0.00       |
| 1073.00 | 35.00 | 65.00  | 160.00 | 25.39 | 3.00  | 1.00      | 2.00      | 2.00           | 0.00    | 0.00         | 0.00   | 3.00   | 4.00         | 6.43       | 1.00   | 26.00         | 0.00      | 2.00       | 1.00    | 16.00      | 64.00         | 0.00       |
| 1074.00 | 34.00 | 80.00  | 173.00 | 26.73 | 3.00  | 1.00      | 2.00      | 2.00           | 1.00    | 0.00         | 1.00   | 3.00   | 7.00         | 8.57       | 1.00   | 33.00         | 1.00      | 6.00       | 0.00    | 18.00      | 72.00         | 0.00       |
| 1075.00 | 35.00 | 80.00  | 172.00 | 27.04 | 3.00  | 1.00      | 2.00      | 2.00           | 0.00    | 0.00         | 1.00   | 3.00   | 7.00         | 34.29      | 1.00   | 28.00         | 0.00      | 1.00       | 1.00    | 16.00      | 64.00         | 0.00       |
| 1076.00 | 38.00 | 96.00  | 184.00 | 28.36 | 3.00  | 1.00      | 2.00      | 2.00           | 0.00    | 0.00         | 1.00   | 3.00   | 4.00         | 36.43      | 1.00   | 30.00         | 1.00      | 5.00       | 1.00    | 15.00      | 60.00         | 0.00       |
| 1077.00 | 35.00 | 82.00  | 170.00 | 28.37 | 3.00  | 1.00      | 2.00      | 2.00           | 0.00    | 1.00         | 1.00   | 2.00   | 6.00         | 2.86       | 1.00   | 23.00         | 0.00      | 1.00       | 1.00    | 13.00      | 52.00         | 0.00       |
| 1078.00 | 35.00 | 65.00  | 161.00 | 25.08 | 3.00  | 1.00      | 2.00      | 2.00           | 1.00    | 1.00         | 0.00   | 3.00   | 6.00         | 7.14       | 1.00   | 26.00         | 0.00      | 9.00       | 0.00    | 15.00      | 60.00         | 0.00       |
| 1079.00 | 42.00 | 70.00  | 162.00 | 26.67 | 3.00  | 1.00      | 3.00      | 1.00           | 0.00    | 0.00         | 0.00   | 2.00   | 7.00         | 0.00       | 1.00   | 30.00         | 1.00      | 1.00       | 1.00    | 13.00      | 52.00         | 0.00       |
| 1080.00 | 44.00 | 100.00 | 190.00 | 27.70 | 3.00  | 1.00      | 3.00      | 2.00           | 1.00    | 0.00         | 1.00   | 3.00   | 6.50         | 12.86      | 1.00   | 25.00         | 0.00      | 6.00       | 0.00    | 16.00      | 64.00         | 0.00       |
| 1081.00 | 41.00 | 102.00 | 193.00 | 27.38 | 3.00  | 1.00      | 3.00      | 2.00           | 1.00    | 1.00         | 1.00   | 2.00   | 10.00        | 8.57       | 1.00   | 28.00         | 0.00      | 7.00       | 0.00    | 12.00      | 48.00         | 1.00       |
| 1082.00 | 42.00 | 74.00  | 174.00 | 24.44 | 2.00  | 1.00      | 1.00      | 2.00           | 1.00    | 1.00         | 1.00   | 1.00   | 8.00         | 0.00       | 1.00   | 32.00         | 1.00      | 5.00       | 1.00    | 14.00      | 56.00         | 0.00       |
| 1083.00 | 37.00 | 54.00  | 154.00 | 22.77 | 2.00  | 1.00      | 2.00      | 2.00           | 1.00    | 0.00         | 0.00   | 3.00   | 11.00        | 0.00       | 1.00   | 23.00         | 0.00      | 7.00       | 0.00    | 10.00      | 40.00         | 1.00       |
| 1084.00 | 40.00 | 58.00  | 163.00 | 21.83 | 2.00  | 1.00      | 2.00      | 2.00           | 1.00    | 1.00         | 1.00   | 1.00   | 6.00         | 1.43       | 1.00   | 26.00         | 0.00      | 7.00       | 0.00    | 8.00       | 32.00         | 1.00       |
| 1085.00 | 34.00 | 54.00  | 161.00 | 20.83 | 2.00  | 1.00      | 2.00      | 2.00           | 0.00    | 0.00         | 0.00   | 2.00   | 9.00         | 0.00       | 1.00   | 26.00         | 0.00      | 1.00       | 1.00    | 13.00      | 52.00         | 0.00       |
| 1086.00 | 40.00 | 69.00  | 167.00 | 24.74 | 2.00  | 1.00      | 2.00      | 2.00           | 0.00    | 0.00         | 0.00   | 3.00   | 6.00         | 30.00      | 1.00   | 19.00         | 0.00      | 4.00       | 1.00    | 15.00      | 60.00         | 0.00       |
| 1087.00 | 41.00 | 76.00  | 176.00 | 24.54 | 2.00  | 1.00      | 2.00      | 2.00           | 0.00    | 0.00         | 0.00   | 3.00   | 3.00         | 4.29       | 1.00   | 30.00         | 1.00      | 5.00       | 1.00    | 10.00      | 40.00         | 1.00       |
| 1088.00 | 38.00 | 70.00  | 171.00 | 23.94 | 2.00  | 1.00      | 2.00      | 2.00           | 1.00    | 0.00         | 1.00   | 3.00   | 7.00         | 1.43       | 1.00   | 23.00         | 0.00      | 5.00       | 1.00    | 16.00      | 64.00         | 0.00       |
| 1089.00 | 40.00 | 56.00  | 168.00 | 19.84 | 2.00  | 1.00      | 2.00      | 2.00           | 0.00    | 0.00         | 0.00   | 3.00   | 5.00         | 38.57      | 1.00   | 30.00         | 1.00      | 5.00       | 1.00    | 15.00      | 60.00         | 0.00       |
| 1090.00 | 38.00 | 60.00  | 157.00 | 24.34 | 2.00  | 0.00      | 2.00      | 2.00           | 0.00    | 1.00         | 0.00   | 1.00   | 6.50         | 0.71       | 1.00   | 35.00         | 1.00      | 10.00      | 0.00    | 12.00      | 48.00         | 1.00       |
| 1091.00 | 36.00 | 72.00  | 175.00 | 23.51 | 2.00  | 1.00      | 2.00      | 2.00           | 1.00    | 1.00         | 1.00   | 2.00   | 6.00         | 28.57      | 1.00   | 27.00         | 0.00      | 3.00       | 1.00    | 15.00      | 60.00         | 0.00       |
| 1092.00 | 36.00 | 80.00  | 180.00 | 24.69 | 2.00  | 1.00      | 2.00      | 2.00           | 1.00    | 1.00         | 1.00   | 2.00   | 8.00         | 10.00      | 1.00   | 19.00         | 0.00      | 7.00       | 0.00    | 17.00      | 68.00         | 0.00       |
| 1093.00 | 37.00 | 45.00  | 150.00 | 20.00 | 2.00  | 1.00      | 3.00      | 2.00           | 0.00    | 0.00         | 0.00   | 2.00   | 6.50         | 34.29      | 1.00   | 31.00         | 1.00      | 4.00       | 1.00    | 17.00      | 68.00         | 0.00       |
| 1094.00 | 39.00 | 82.00  | 175.00 | 26.78 | 3.00  | 0.00      | 2.00      | 2.00           | 1.00    | 0.00         | 1.00   | 2.00   | 9.00         | 0.00       | 1.00   | 23.00         | 0.00      | 11.00      | 0.00    | 14.00      | 56.00         | 0.00       |
| 1095.00 | 37.00 | 82.00  | 172.00 | 27.72 | 3.00  | 1.00      | 2.00      | 2.00           | 0.00    | 0.00         | 1.00   | 3.00   | 1.50         | 0.00       | 1.00   | 28.00         | 0.00      | 6.00       | 0.00    | 13.00      | 52.00         | 0.00       |
| 1096.00 | 37.00 | 81.00  | 178.00 | 25.56 | 3.00  | 1.00      | 2.00      | 2.00           | 0.00    | 1.00         | 1.00   | 3.00   | 6.50         | 60.00      | 1.00   | 29.00         | 0.00      | 4.00       | 1.00    | 15.00      | 60.00         | 0.00       |
| 1097.00 | 35.00 | 85.00  | 180.00 | 26.23 | 3.00  | 1.00      | 2.00      | 2.00           | 0.00    | 1.00         | 1.00   | 3.00   | 5.00         | 34.29      | 1.00   | 20.00         | 0.00      | 7.00       | 0.00    | 21.00      | 84.00         | 0.00       |
| 1098.00 | 40.00 | 88.00  | 178.00 | 27.77 | 3.00  | 1.00      | 3.00      | 2.00           | 0.00    | 0.00         | 1.00   | 3.00   | 7.00         | 8.57       | 1.00   | 29.00         | 0.00      | 5.00       | 1.00    | 12.00      | 48.00         | 1.00       |
| 1099.00 | 36.00 | 58.00  | 152.00 | 25.10 | 3.00  | 1.00      | 3.00      | 1.00           | 0.00    | 0.00         | 0.00   | 3.00   | 10.00        | 25.71      | 1.00   | 36.00         | 1.00      | 0.00       | 1.00    | 14.00      | 56.00         | 0.00       |
| 1100.00 | 44.00 | 88.00  | 185.00 | 25.71 | 3.00  | 1.00      | 3.00      | 2.00           | 1.00    | 0.00         | 1.00   | 3.00   | 7.00         | 4.29       | 1.00   | 23.00         | 0.00      | 4.00       | 1.00    | 12.00      | 48.00         | 1.00       |
| 1101.00 | 37.00 | 60.00  | 159.00 | 23.73 | 2.00  | 1.00      | 2.00      | 2.00           | 0.00    | 0.00         | 0.00   | 3.00   | 6.00         | 0.00       | 1.00   | 32.00         | 1.00      | 5.00       | 1.00    | 14.00      | 56.00         | 0.00       |
| 1102.00 | 40.00 | 73.00  | 171.00 | 24.96 | 2.00  | 1.00      | 2.00      | 2.00           | 1.00    | 1.00         | 1.00   | 3.00   | 6.50         | 6.43       | 1.00   | 34.00         | 1.00      | 2.00       | 1.00    | 12.00      | 48.00         | 1.00       |
| 1103.00 | 44.00 | 90.00  | 168.00 | 31.89 | 4.00  | 0.00      | 1.00      | 3.00           | 0.00    | 0.00         | 0.00   | 3.00   | 4.00         | 17.14      | 1.00   | 37.00         | 1.00      | 4.00       | 1.00    | 12.00      | 48.00         | 1.00       |
| 1104.00 | 36.00 | 100.00 | 178.00 | 31.56 | 4.00  | 1.00      | 2.00      | 1.00           | 1.00    | 0.00         | 1.00   | 3.00   | 7.00         | 8.57       | 1.00   | 29.00         | 0.00      | 3.00       | 1.00    | 17.00      | 68.00         | 0.00       |
| 1105.00 | 41.00 | 75.00  | 170.00 | 25.95 | 3.00  | 1.00      | 1.00      | 2.00           | 1.00    | 1.00         | 1.00   | 1.00   | 3.00         | 8.57       | 1.00   | 24.00         | 0.00      | 5.00       | 1.00    | 13.00      | 52.00         | 0.00       |
| 1106.00 | 34.00 | 70.00  | 163.00 | 26.35 | 3.00  | 1.00      | 2.00      | 2.00           | 0.00    | 1.00         | 0.00   | 1.00   | 2.50         | 8.57       | 1.00   | 32.00         | 1.00      | 6.00       | 0.00    | 10.00      | 40.00         | 1.00       |
| 1107.00 | 37.00 | 56.00  | 170.00 | 19.38 | 2.00  | 1.00      | 1.00      | 2.00           | 0.00    | 0.00         | 0.00   | 3.00   | 4.00         | 2.86       | 1.00   | 33.00         | 1.00      | 4.00       | 1.00    | 16.00      | 64.00         | 0.00       |
| 1108.00 | 44.00 | 75.00  | 182.00 | 22.64 | 2.00  | 1.00      | 1.00      | 3.00           | 1.00    | 0.00         | 1.00   | 3.00   | 4.00         | 55.71      | 1.00   | 28.00         | 0.00      | 4.00       | 1.00    | 10.00      | 40.00         | 1.00       |
| 1109.00 | 35.00 | 76.00  | 183.00 | 22.69 | 2.00  | 0.00      | 1.00      | 2.00           | 1.00    | 1.00         | 1.00   | 2.00   | 9.00         | 60.00      | 1.00   | 24.00         | 0.00      | 6.00       | 0.00    | 6.00       | 24.00         | 1.00       |
| 1110.00 | 38.00 | 60.00  | 167.00 | 21.51 | 2.00  | 1.00      | 2.00      | 2.00           | 0.00    | 0.00         | 0.00   | 2.00   | 1.00         | 51.43      | 1.00   | 33.00         | 1.00      | 2.00       | 1.00    | 12.00      | 48.00         | 1.00       |
| 1111.00 | 43.00 | 60.00  | 182.00 | 18.11 | 1.0   |           |           |                |         |              |        |        |              |            |        |               |           |            |         |            |               |            |

| Subject | Age   | Weight | Height | BMI   | BMI_C | Residence | Education | Marital_Status | Smoking | Chronic_Dise | Gender | Health | Sitting_Time | PA_Min_Day | IPAQ_C | Dietary_Score | Dietary_C | PSQI_Total | Sleep_C | WHO5_Total | WHO5_Total100 | WHO5_Class |
|---------|-------|--------|--------|-------|-------|-----------|-----------|----------------|---------|--------------|--------|--------|--------------|------------|--------|---------------|-----------|------------|---------|------------|---------------|------------|
| 1123.00 | 44.00 | 90.00  | 170.00 | 31.14 | 4.00  | 1.00      | 2.00      | 2.00           | 0.00    | 1.00         | 0.00   | 3.00   | 6.50         | 60.00      | 1.00   | 30.00         | 1.00      | 2.00       | 1.00    | 15.00      | 60.00         | 0.00       |
| 1124.00 | 34.00 | 95.00  | 168.00 | 33.66 | 4.00  | 1.00      | 3.00      | 2.00           | 1.00    | 0.00         | 0.00   | 2.00   | 6.00         | 25.71      | 1.00   | 28.00         | 0.00      | 7.00       | 0.00    | 15.00      | 60.00         | 0.00       |
| 1125.00 | 39.00 | 72.00  | 164.00 | 26.77 | 3.00  | 1.00      | 1.00      | 2.00           | 0.00    | 0.00         | 0.00   | 2.00   | 4.00         | 0.00       | 1.00   | 23.00         | 0.00      | 6.00       | 0.00    | 9.00       | 36.00         | 1.00       |
| 1126.00 | 42.00 | 70.00  | 164.00 | 26.03 | 3.00  | 1.00      | 1.00      | 2.00           | 0.00    | 1.00         | 0.00   | 3.00   | 4.00         | 17.14      | 1.00   | 22.00         | 0.00      | 5.00       | 1.00    | 9.00       | 36.00         | 1.00       |
| 1127.00 | 40.00 | 70.00  | 164.00 | 26.03 | 3.00  | 1.00      | 1.00      | 2.00           | 0.00    | 0.00         | 0.00   | 3.00   | 10.00        | 4.29       | 1.00   | 28.00         | 0.00      | 5.00       | 1.00    | 14.00      | 56.00         | 0.00       |
| 1128.00 | 42.00 | 73.00  | 165.00 | 26.81 | 3.00  | 1.00      | 1.00      | 2.00           | 0.00    | 0.00         | 0.00   | 3.00   | 5.00         | 15.71      | 1.00   | 20.00         | 0.00      | 3.00       | 1.00    | 16.00      | 64.00         | 0.00       |
| 1129.00 | 37.00 | 80.00  | 167.00 | 28.69 | 3.00  | 1.00      | 1.00      | 2.00           | 1.00    | 1.00         | 0.00   | 2.00   | 6.00         | 25.71      | 1.00   | 19.00         | 0.00      | 10.00      | 0.00    | 6.00       | 24.00         | 1.00       |
| 1130.00 | 40.00 | 64.00  | 159.00 | 25.32 | 3.00  | 1.00      | 1.00      | 2.00           | 0.00    | 1.00         | 0.00   | 3.00   | 6.00         | 34.29      | 1.00   | 28.00         | 0.00      | 0.00       | 1.00    | 19.00      | 76.00         | 0.00       |
| 1131.00 | 39.00 | 70.00  | 160.00 | 27.34 | 3.00  | 0.00      | 1.00      | 2.00           | 0.00    | 1.00         | 0.00   | 3.00   | 2.00         | 38.71      | 1.00   | 40.00         | 1.00      | 1.00       | 1.00    | 13.00      | 52.00         | 0.00       |
| 1132.00 | 36.00 | 70.00  | 164.00 | 26.03 | 3.00  | 1.00      | 2.00      | 2.00           | 0.00    | 1.00         | 0.00   | 2.00   | 11.00        | 0.00       | 1.00   | 31.00         | 1.00      | 8.00       | 0.00    | 12.00      | 48.00         | 1.00       |
| 1133.00 | 42.00 | 80.00  | 164.00 | 29.74 | 3.00  | 1.00      | 2.00      | 2.00           | 0.00    | 1.00         | 0.00   | 2.00   | 4.00         | 4.29       | 1.00   | 38.00         | 1.00      | 2.00       | 1.00    | 12.00      | 48.00         | 1.00       |
| 1134.00 | 35.00 | 70.00  | 163.00 | 26.35 | 3.00  | 1.00      | 2.00      | 2.00           | 0.00    | 1.00         | 0.00   | 3.00   | 3.50         | 0.00       | 1.00   | 31.00         | 1.00      | 4.00       | 1.00    | 11.00      | 44.00         | 1.00       |
| 1135.00 | 44.00 | 74.00  | 161.00 | 28.55 | 3.00  | 1.00      | 2.00      | 2.00           | 0.00    | 0.00         | 0.00   | 3.00   | 4.00         | 19.29      | 1.00   | 32.00         | 1.00      | 8.00       | 0.00    | 15.00      | 60.00         | 0.00       |
| 1136.00 | 34.00 | 76.00  | 175.00 | 24.82 | 2.00  | 1.00      | 1.00      | 2.00           | 0.00    | 1.00         | 0.00   | 2.00   | 5.00         | 14.29      | 1.00   | 31.00         | 1.00      | 5.00       | 1.00    | 13.00      | 52.00         | 0.00       |
| 1137.00 | 34.00 | 70.00  | 172.00 | 23.66 | 2.00  | 1.00      | 1.00      | 1.00           | 0.00    | 0.00         | 0.00   | 3.00   | 4.00         | 20.14      | 1.00   | 27.00         | 0.00      | 6.00       | 0.00    | 14.00      | 56.00         | 0.00       |
| 1138.00 | 41.00 | 64.00  | 163.00 | 24.09 | 2.00  | 1.00      | 1.00      | 2.00           | 1.00    | 1.00         | 0.00   | 2.00   | 1.50         | 4.29       | 1.00   | 31.00         | 1.00      | 8.00       | 0.00    | 9.00       | 36.00         | 1.00       |
| 1139.00 | 41.00 | 64.00  | 164.00 | 23.80 | 2.00  | 1.00      | 2.00      | 2.00           | 0.00    | 0.00         | 0.00   | 3.00   | 6.50         | 38.57      | 1.00   | 21.00         | 0.00      | 4.00       | 1.00    | 8.00       | 32.00         | 1.00       |
| 1140.00 | 44.00 | 65.00  | 165.00 | 23.88 | 2.00  | 1.00      | 2.00      | 2.00           | 0.00    | 0.00         | 0.00   | 3.00   | 1.50         | 28.57      | 1.00   | 32.00         | 1.00      | 4.00       | 1.00    | 12.00      | 48.00         | 1.00       |
| 1141.00 | 34.00 | 56.00  | 158.00 | 22.43 | 2.00  | 1.00      | 2.00      | 2.00           | 0.00    | 0.00         | 0.00   | 2.00   | 5.00         | 0.00       | 1.00   | 27.00         | 0.00      | 11.00      | 0.00    | 11.00      | 44.00         | 1.00       |
| 1142.00 | 35.00 | 67.00  | 165.00 | 24.61 | 2.00  | 1.00      | 2.00      | 2.00           | 0.00    | 0.00         | 0.00   | 3.00   | 7.00         | 25.71      | 1.00   | 29.00         | 0.00      | 2.00       | 1.00    | 14.00      | 56.00         | 0.00       |
| 1143.00 | 36.00 | 70.00  | 173.00 | 23.39 | 2.00  | 1.00      | 2.00      | 2.00           | 1.00    | 0.00         | 0.00   | 3.00   | 4.00         | 0.00       | 1.00   | 27.00         | 0.00      | 8.00       | 0.00    | 13.00      | 52.00         | 0.00       |
| 1144.00 | 35.00 | 58.00  | 176.00 | 18.72 | 2.00  | 1.00      | 2.00      | 2.00           | 0.00    | 0.00         | 0.00   | 3.00   | 4.00         | 4.29       | 1.00   | 27.00         | 0.00      | 3.00       | 1.00    | 20.00      | 80.00         | 0.00       |
| 1145.00 | 38.00 | 49.00  | 158.00 | 19.63 | 2.00  | 1.00      | 2.00      | 2.00           | 1.00    | 0.00         | 0.00   | 3.00   | 4.50         | 0.00       | 1.00   | 28.00         | 0.00      | 6.00       | 0.00    | 15.00      | 60.00         | 0.00       |
| 1146.00 | 35.00 | 61.00  | 163.00 | 22.96 | 2.00  | 1.00      | 2.00      | 2.00           | 1.00    | 1.00         | 0.00   | 2.00   | 9.00         | 0.00       | 1.00   | 30.00         | 1.00      | 5.00       | 1.00    | 11.00      | 44.00         | 1.00       |
| 1147.00 | 41.00 | 67.00  | 167.00 | 24.02 | 2.00  | 1.00      | 2.00      | 2.00           | 0.00    | 1.00         | 0.00   | 2.00   | 6.00         | 8.57       | 1.00   | 28.00         | 0.00      | 5.00       | 1.00    | 16.00      | 64.00         | 0.00       |
| 1148.00 | 40.00 | 63.00  | 167.00 | 22.59 | 2.00  | 1.00      | 2.00      | 2.00           | 0.00    | 1.00         | 0.00   | 3.00   | 9.00         | 25.71      | 1.00   | 28.00         | 0.00      | 6.00       | 0.00    | 11.00      | 44.00         | 1.00       |
| 1149.00 | 39.00 | 63.00  | 162.00 | 24.01 | 2.00  | 1.00      | 2.00      | 2.00           | 1.00    | 1.00         | 0.00   | 3.00   | 5.00         | 0.00       | 1.00   | 28.00         | 0.00      | 4.00       | 1.00    | 12.00      | 48.00         | 1.00       |
| 1150.00 | 40.00 | 65.00  | 168.00 | 23.03 | 2.00  | 1.00      | 2.00      | 2.00           | 0.00    | 1.00         | 0.00   | 3.00   | 4.50         | 0.00       | 1.00   | 31.00         | 1.00      | 3.00       | 1.00    | 15.00      | 60.00         | 0.00       |
| 1151.00 | 44.00 | 95.00  | 192.00 | 25.77 | 3.00  | 1.00      | 2.00      | 2.00           | 1.00    | 1.00         | 1.00   | 3.00   | 10.00        | 22.86      | 1.00   | 28.00         | 0.00      | 6.00       | 0.00    | 10.00      | 40.00         | 1.00       |
| 1152.00 | 44.00 | 95.00  | 192.00 | 25.77 | 3.00  | 1.00      | 2.00      | 2.00           | 1.00    | 1.00         | 1.00   | 3.00   | 11.00        | 60.00      | 1.00   | 27.00         | 0.00      | 2.00       | 1.00    | 18.00      | 72.00         | 0.00       |
| 1153.00 | 37.00 | 90.00  | 178.00 | 28.41 | 3.00  | 1.00      | 3.00      | 1.00           | 1.00    | 0.00         | 1.00   | 3.00   | 9.00         | 2.14       | 1.00   | 31.00         | 1.00      | 6.00       | 0.00    | 9.00       | 36.00         | 1.00       |
| 1154.00 | 42.00 | 83.00  | 176.00 | 26.79 | 3.00  | 1.00      | 3.00      | 2.00           | 0.00    | 1.00         | 1.00   | 2.00   | 8.00         | 8.57       | 1.00   | 23.00         | 0.00      | 9.00       | 0.00    | 6.00       | 24.00         | 1.00       |
| 1155.00 | 38.00 | 77.00  | 176.00 | 24.86 | 2.00  | 1.00      | 3.00      | 2.00           | 0.00    | 0.00         | 1.00   | 2.00   | 7.00         | 4.29       | 1.00   | 29.00         | 0.00      | 2.00       | 1.00    | 12.00      | 48.00         | 1.00       |
| 1156.00 | 40.00 | 95.00  | 165.00 | 34.89 | 4.00  | 1.00      | 2.00      | 2.00           | 1.00    | 0.00         | 0.00   | 3.00   | 8.00         | 4.29       | 1.00   | 24.00         | 0.00      | 7.00       | 0.00    | 10.00      | 40.00         | 1.00       |
| 1157.00 | 41.00 | 91.00  | 187.00 | 26.02 | 3.00  | 0.00      | 2.00      | 2.00           | 0.00    | 0.00         | 1.00   | 3.00   | 4.00         | 27.86      | 1.00   | 21.00         | 0.00      | 4.00       | 1.00    | 15.00      | 60.00         | 0.00       |
| 1158.00 | 41.00 | 85.00  | 178.00 | 26.83 | 3.00  | 1.00      | 2.00      | 2.00           | 1.00    | 1.00         | 1.00   | 2.00   | 4.00         | 27.86      | 1.00   | 21.00         | 0.00      | 3.00       | 1.00    | 11.00      | 44.00         | 1.00       |
| 1159.00 | 41.00 | 87.00  | 179.00 | 27.15 | 3.00  | 0.00      | 2.00      | 1.00           | 1.00    | 1.00         | 1.00   | 2.00   | 3.00         | 32.14      | 1.00   | 23.00         | 0.00      | 3.00       | 1.00    | 14.00      | 56.00         | 0.00       |
| 1160.00 | 37.00 | 86.00  | 165.00 | 31.59 | 4.00  | 1.00      | 2.00      | 2.00           | 0.00    | 0.00         | 0.00   | 2.00   | 6.00         | 12.86      | 1.00   | 29.00         | 0.00      | 6.00       | 0.00    | 11.00      | 44.00         | 1.00       |
| 1161.00 | 40.00 | 112.00 | 183.00 | 33.44 | 4.00  | 1.00      | 3.00      | 2.00           | 1.00    | 0.00         | 1.00   | 3.00   | 10.00        | 2.14       | 1.00   | 29.00         | 0.00      | 5.00       | 1.00    | 15.00      | 60.00         | 0.00       |
| 1162.00 | 37.00 | 99.00  | 181.00 | 30.22 | 4.00  | 1.00      | 3.00      | 2.00           | 0.00    | 1.00         | 1.00   | 3.00   | 5.00         | 10.71      | 1.00   | 30.00         | 1.00      | 4.00       | 1.00    | 14.00      | 56.00         | 0.00       |
| 1163.00 | 39.00 | 90.00  | 172.00 | 30.42 | 4.00  | 1.00      | 3.00      | 2.00           | 1.00    | 1.00         | 1.00   | 3.00   | 10.00        | 34.29      | 1.00   | 31.00         | 1.00      | 2.00       | 1.00    | 13.00      | 52.00         | 0.00       |
| 1164.00 | 34.00 | 69.00  | 160.00 | 26.95 | 3.00  | 1.00      | 2.00      | 3.00           | 0.00    | 0.00         | 0.00   | 3.00   | 6.00         | 0.00       | 1.00   | 30.00         | 1.00      | 3.00       | 1.00    | 13.00      | 52.00         | 0.00       |
| 1165.00 | 39.00 | 82.00  | 177.00 | 26.17 | 3.00  | 1.00      | 3.00      | 2.00           | 0.00    | 1.00         | 0.00   | 3.00   | 2.50         | 8.57       | 1.00   | 29.00         | 0.00      | 8.00       | 0.00    | 16.00      | 64.00         | 0.00       |
| 1166.00 | 43.00 | 74.00  | 170.00 | 25.61 | 3.00  | 1.00      | 3.00      | 2.00           | 1.00    | 1.00         | 1.00   | 3.00   | 6.00         | 21.43      | 1.00   | 34.00         | 1.00      | 1.00       | 1.00    | 17.00      | 68.00         | 0.00       |
| 1167.00 | 38.00 | 55.00  | 162.00 | 20.96 | 2.00  | 1.00      | 1.00      | 1.00           | 0.00    | 0.00         | 0.00   | 1.00   | 7.00         | 0.00       | 1.00   | 17.00         | 0.00      | 9.00       | 0.00    | 11.00      | 44.00         | 1.00       |
| 1168.00 | 44.00 | 58.00  | 161.00 | 22.38 | 2.00  | 1.00      | 2.00      | 2.00           | 0.00    | 0.00         | 0.00   | 3.00   | 7.00         | 25.71      | 1.00   | 32.00         | 1.00      | 6.00       | 0.00    | 13.00      | 52.00         | 0.00       |
| 1169.00 | 40.00 | 54.00  | 157.00 | 21.91 | 2.00  | 1.00      | 3.00      | 2.00           | 0.00    | 0.00         | 0.00   | 3.00   | 2.00         | 8.57       | 1.00   | 33.00         | 1.00      | 4.00       | 1.00    | 10.00      | 40.00         | 1.00       |
| 1170.00 | 43.00 | 77.50  | 169.00 | 27.13 | 3.00  | 1.00      | 2.00      | 2.00           | 1.00    | 1.00         | 1.00   | 2.00   | 4.50         | 55.71      | 1.00   | 23.00         | 0.00      | 7.00       | 0.00    | 11.00      | 44.00         | 1.00       |
| 1171.00 | 42.00 | 75.00  | 165.00 | 27.55 | 3.00  | 1.00      | 2.00      | 3.00           | 1.00    | 0.00         | 0.00   | 1.00   | 6.00         | 0.00       | 1.00   | 24.00         | 0.00      | 4.00       | 1.00    | 12.00      | 48.00         | 1.00       |
| 1172.00 | 40.00 | 65.00  | 150.00 | 28.89 | 3.00  | 0.00      | 2.00      | 2.00           | 0.00    | 0.00         | 0.00   | 3.00   | 6.00         | 0.00       | 1.00   | 23.00         | 0.00      | 14.00      | 0.00    | 7.00       | 28.00         | 1.00       |
| 1173.00 | 35.00 | 90.00  | 170.00 | 31.14 | 4.00  | 1.00      | 3.00      | 2.00           | 0.00    | 0.00         | 1.00   | 1.00   | 9.00         | 0.00       | 1.00   | 25.00         | 0.00      | 2.00       | 1.00    | 9.00       | 36.00         | 1.00       |
| 1174.00 | 43.00 | 117.00 | 165.00 | 42.98 | 4.00  | 1.00      | 2.00      | 2.00           | 0.00    | 0.00         | 0.00   | 1.00   | 11.00        | 6.43       | 1.00   | 27.00         | 0.00      | 12.00      | 0.00    | 9.00       | 36.00         | 1.00       |
| 1175.00 | 39.00 | 85.00  | 164.00 | 31.60 | 4.00  | 1.00      | 2.00      | 2.00           | 1.00    | 0.00         | 0.00   | 2.00   | 10.00        | 51.43      | 1.00   | 28.00         | 0.00      | 9.00       | 0.00    | 2.00       | 8.00          | 1.00       |
| 1176.00 | 43.00 | 76.00  | 158.00 | 30.44 | 4.00  | 1.00      | 2.00      | 3.00           | 0.00    | 0.00         | 0.00   | 2.00   | 9.00         | 0.00       | 1.00   | 19.00         | 0.00      | 4.00       | 1.00    | 18.00      | 72.00         | 0.00       |
| 1177.00 | 43.00 | 76.00  | 158.00 | 30.44 | 4.00  | 1.0       |           |                |         |              |        |        |              |            |        |               |           |            |         |            |               |            |

| Subject | Age   | Weight | Height | BMI     | BMI_C | Residence | Education | Marital_Status | Smoking | Chronic_Dise | Gender | Health | Sitting_Time | PA_Min_Day | IPAQ_C | Dietary_Score | Dietary_C | PSQI_Total | Sleep_C | WHO5_Total | WHO5_Total100 | WHO5_Class |
|---------|-------|--------|--------|---------|-------|-----------|-----------|----------------|---------|--------------|--------|--------|--------------|------------|--------|---------------|-----------|------------|---------|------------|---------------|------------|
| 1189.00 | 42.00 | 69.00  | 156.00 | 28.35   | 3.00  | 1.00      | 2.00      | 2.00           | 0.00    | 1.00         | 0.00   | 3.00   | 6.00         | 46.43      | 1.00   | 29.00         | 0.00      | 3.00       | 1.00    | 14.00      | 56.00         | 0.00       |
| 1190.00 | 40.00 | 70.00  | 160.00 | 27.34   | 3.00  | 1.00      | 2.00      | 2.00           | 0.00    | 0.00         | 0.00   | 2.00   | 4.00         | 25.71      | 1.00   | 27.00         | 0.00      | 7.00       | 0.00    | 12.00      | 48.00         | 1.00       |
| 1191.00 | 43.00 | 76.00  | 173.00 | 25.39   | 3.00  | 1.00      | 2.00      | 2.00           | 0.00    | 0.00         | 1.00   | 3.00   | 8.00         | 48.57      | 1.00   | 25.00         | 0.00      | 8.00       | 0.00    | 13.00      | 52.00         | 0.00       |
| 1192.00 | 35.00 | 87.00  | 183.00 | 25.98   | 3.00  | 1.00      | 2.00      | 2.00           | 1.00    | 0.00         | 1.00   | 3.00   | 6.00         | 34.29      | 1.00   | 38.00         | 1.00      | 2.00       | 1.00    | 15.00      | 60.00         | 0.00       |
| 1193.00 | 40.00 | 80.00  | 175.00 | 26.12   | 3.00  | 1.00      | 2.00      | 2.00           | 0.00    | 0.00         | 1.00   | 3.00   | 5.00         | 24.29      | 1.00   | 22.00         | 0.00      | 7.00       | 0.00    | 15.00      | 60.00         | 0.00       |
| 1194.00 | 37.00 | 76.00  | 166.00 | 27.58   | 3.00  | 1.00      | 2.00      | 2.00           | 1.00    | 1.00         | 1.00   | 1.00   | 10.00        | 0.00       | 1.00   | 16.00         | 0.00      | 7.00       | 0.00    | 15.00      | 60.00         | 0.00       |
| 1195.00 | 40.00 | 98.00  | 188.00 | 27.73   | 3.00  | 1.00      | 2.00      | 2.00           | 1.00    | 1.00         | 1.00   | 2.00   | 10.00        | 6.43       | 1.00   | 29.00         | 0.00      | 5.00       | 1.00    | 11.00      | 44.00         | 1.00       |
| 1196.00 | 38.00 | 70.00  | 154.00 | 29.52   | 3.00  | 1.00      | 2.00      | 2.00           | 0.00    | 1.00         | 0.00   | 3.00   | 7.00         | 2.14       | 1.00   | 26.00         | 0.00      | 12.00      | 0.00    | 14.00      | 56.00         | 0.00       |
| 1197.00 | 39.00 | 80.00  | 175.00 | 26.12   | 3.00  | 1.00      | 3.00      | 2.00           | 0.00    | 0.00         | 1.00   | 2.00   | 6.50         | 1.43       | 1.00   | 30.00         | 1.00      | 11.00      | 0.00    | 9.00       | 36.00         | 1.00       |
| 1198.00 | 43.00 | 75.00  | 167.00 | 26.89   | 3.00  | 1.00      | 3.00      | 2.00           | 1.00    | 0.00         | 0.00   | 3.00   | 9.00         | 4.29       | 1.00   | 35.00         | 1.00      | 5.00       | 1.00    | 15.00      | 60.00         | 0.00       |
| 1199.00 | 34.00 | 64.00  | 172.00 | 21.63   | 2.00  | 1.00      | 1.00      | 3.00           | 1.00    | 0.00         | 0.00   | 3.00   | 2.00         | 0.00       | 1.00   | 33.00         | 1.00      | 4.00       | 1.00    | 13.00      | 52.00         | 0.00       |
| 1200.00 | 39.00 | 75.00  | 189.00 | 21.00   | 2.00  | 1.00      | 2.00      | 2.00           | 0.00    | 0.00         | 0.00   | 3.00   | 4.00         | 17.14      | 1.00   | 23.00         | 0.00      | 5.00       | 1.00    | 10.00      | 40.00         | 1.00       |
| 1201.00 | 39.00 | 58.00  | 165.00 | 21.30   | 2.00  | 0.00      | 2.00      | 2.00           | 1.00    | 0.00         | 0.00   | 3.00   | 8.00         | 15.71      | 1.00   | 34.00         | 1.00      | 10.00      | 0.00    | 12.00      | 48.00         | 1.00       |
| 1202.00 | 42.00 | 60.00  | 156.00 | 24.65   | 2.00  | 0.00      | 2.00      | 2.00           | 0.00    | 0.00         | 0.00   | 3.00   | 6.00         | 12.86      | 1.00   | 28.00         | 0.00      | 2.00       | 1.00    | 14.00      | 56.00         | 0.00       |
| 1203.00 | 42.00 | 70.00  | 172.00 | 23.66   | 2.00  | 1.00      | 2.00      | 2.00           | 0.00    | 0.00         | 0.00   | 3.00   | 4.50         | 30.00      | 1.00   | 36.00         | 1.00      | 87.21      | 0.00    | 16.00      | 64.00         | 0.00       |
| 1204.00 | 37.00 | 69.00  | 174.00 | 22.79   | 2.00  | 1.00      | 2.00      | 2.00           | 0.00    | 1.00         | 1.00   | 2.00   | 8.00         | 68.57      | 1.00   | 30.00         | 1.00      | 0.00       | 1.00    | 14.00      | 56.00         | 0.00       |
| 1205.00 | 37.00 | 70.00  | 173.00 | 23.39   | 2.00  | 1.00      | 2.00      | 2.00           | 1.00    | 0.00         | 0.00   | 2.00   | 3.00         | 0.00       | 1.00   | 30.00         | 1.00      | 4.00       | 1.00    | 11.00      | 44.00         | 1.00       |
| 1206.00 | 37.00 | 56.00  | 165.00 | 20.57   | 2.00  | 1.00      | 2.00      | 2.00           | 1.00    | 0.00         | 0.00   | 2.00   | 5.50         | 12.86      | 1.00   | 24.00         | 0.00      | 10.00      | 0.00    | 7.00       | 28.00         | 1.00       |
| 1207.00 | 38.00 | 55.00  | 165.00 | 20.20   | 2.00  | 1.00      | 2.00      | 2.00           | 1.00    | 0.00         | 0.00   | 2.00   | 7.00         | 53.57      | 1.00   | 33.00         | 1.00      | 1.00       | 1.00    | 12.00      | 48.00         | 1.00       |
| 1208.00 | 43.00 | 60.00  | 156.00 | 24.65   | 2.00  | 0.00      | 2.00      | 2.00           | 0.00    | 0.00         | 0.00   | 3.00   | 7.00         | 25.71      | 1.00   | 36.00         | 1.00      | 7.00       | 0.00    | 9.00       | 36.00         | 1.00       |
| 1209.00 | 42.00 | 61.00  | 159.00 | 24.13   | 2.00  | 1.00      | 2.00      | 2.00           | 0.00    | 0.00         | 0.00   | 3.00   | 6.00         | 0.00       | 1.00   | 18.00         | 0.00      | 7.00       | 0.00    | 10.00      | 40.00         | 1.00       |
| 1210.00 | 39.00 | 78.00  | 183.00 | 23.29   | 2.00  | 1.00      | 2.00      | 2.00           | 0.00    | 0.00         | 1.00   | 3.00   | 5.00         | 39.29      | 1.00   | 32.00         | 1.00      | 8.00       | 0.00    | 10.00      | 40.00         | 1.00       |
| 1211.00 | 39.00 | 72.00  | 176.00 | 23.24   | 2.00  | 0.00      | 2.00      | 2.00           | 0.00    | 0.00         | 1.00   | 3.00   | 4.00         | 36.00      | 1.00   | 30.00         | 1.00      | 11.00      | 0.00    | 16.00      | 64.00         | 0.00       |
| 1212.00 | 40.00 | 75.00  | 178.00 | 23.67   | 2.00  | 1.00      | 2.00      | 2.00           | 1.00    | 1.00         | 1.00   | 2.00   | 4.00         | 12.86      | 1.00   | 29.00         | 0.00      | 6.00       | 0.00    | 12.00      | 48.00         | 1.00       |
| 1213.00 | 39.00 | 74.00  | 175.00 | 24.16   | 2.00  | 1.00      | 2.00      | 2.00           | 1.00    | 1.00         | 1.00   | 2.00   | 5.00         | 5.71       | 1.00   | 29.00         | 0.00      | 6.00       | 0.00    | 11.00      | 44.00         | 1.00       |
| 1214.00 | 40.00 | 70.00  | 168.00 | 24.80   | 2.00  | 1.00      | 3.00      | 2.00           | 0.00    | 0.00         | 0.00   | 2.00   | 6.50         | 12.86      | 1.00   | 32.00         | 1.00      | 3.00       | 1.00    | 16.00      | 64.00         | 0.00       |
| 1215.00 | 35.00 | 70.00  | 168.00 | 24.80   | 2.00  | 1.00      | 3.00      | 2.00           | 1.00    | 0.00         | 1.00   | 3.00   | 5.00         | 18.57      | 1.00   | 28.00         | 0.00      | 8.00       | 0.00    | 9.00       | 36.00         | 1.00       |
| 1216.00 | 38.00 | 77.00  | 177.00 | 24.58   | 2.00  | 1.00      | 3.00      | 2.00           | 0.00    | 0.00         | 1.00   | 3.00   | 6.00         | 38.57      | 1.00   | 32.00         | 1.00      | 9.00       | 0.00    | 12.00      | 48.00         | 1.00       |
| 1217.00 | 35.00 | 74.00  | 173.00 | 24.73   | 2.00  | 1.00      | 3.00      | 2.00           | 0.00    | 0.00         | 1.00   | 3.00   | 11.00        | 2.86       | 1.00   | 24.00         | 0.00      | 4.00       | 1.00    | 12.00      | 48.00         | 1.00       |
| 1218.00 | 39.00 | 60.00  | 160.00 | 23.44   | 2.00  | 1.00      | 3.00      | 3.00           | 0.00    | 0.00         | 0.00   | 3.00   | 3.50         | 21.43      | 1.00   | 38.00         | 1.00      | 3.00       | 1.00    | 19.00      | 76.00         | 0.00       |
| 1219.00 | 39.00 | 55.00  | 158.00 | 22.03   | 2.00  | 1.00      | 3.00      | 1.00           | 1.00    | 0.00         | 0.00   | 3.00   | 9.00         | 0.00       | 1.00   | 22.00         | 0.00      | 4.00       | 1.00    | 18.00      | 72.00         | 0.00       |
| 1220.00 | 38.00 | 88.00  | 188.00 | 24.90   | 2.00  | 1.00      | 3.00      | 2.00           | 0.00    | 1.00         | 1.00   | 1.00   | 2.50         | 8.57       | 1.00   | 30.00         | 1.00      | 5.00       | 1.00    | 12.00      | 48.00         | 1.00       |
| 1221.00 | 39.00 | 54.00  | 173.00 | 18.04   | 1.00  | 1.00      | 2.00      | 2.00           | 1.00    | 1.00         | 1.00   | 3.00   | 9.00         | 1.43       | 1.00   | 30.00         | 1.00      | 3.00       | 1.00    | 13.00      | 52.00         | 0.00       |
| 1222.00 | 42.00 | 85.00  | 155.00 | 35.38   | 4.00  | 1.00      | 2.00      | 2.00           | 0.00    | 0.00         | 0.00   | 3.00   | 1.50         | 0.00       | 1.00   | 24.00         | 0.00      | 3.00       | 1.00    | 13.00      | 52.00         | 0.00       |
| 1223.00 | 36.00 | 58.00  | 156.00 | 23.83   | 2.00  | 1.00      | 2.00      | 2.00           | 0.00    | 0.00         | 0.00   | 2.00   | 5.00         | 0.00       | 1.00   | 30.00         | 1.00      | 7.00       | 0.00    | 11.00      | 44.00         | 1.00       |
| 1224.00 | 40.00 | 70.00  | 170.00 | 24.22   | 2.00  | 1.00      | 2.00      | 2.00           | 0.00    | 0.00         | 0.00   | 2.00   | 2.50         | 0.00       | 1.00   | 28.00         | 0.00      | 6.00       | 0.00    | 16.00      | 64.00         | 0.00       |
| 1225.00 | 39.00 | 92.00  | 160.00 | 35.94   | 4.00  | 1.00      | 3.00      | 2.00           | 0.00    | 0.00         | 0.00   | 2.00   | 7.00         | 21.43      | 1.00   | 31.00         | 1.00      | 4.00       | 1.00    | 20.00      | 80.00         | 0.00       |
| 1226.00 | 41.00 | 110.00 | 177.00 | 35.11   | 4.00  | 1.00      | 3.00      | 2.00           | 0.00    | 0.00         | 1.00   | 3.00   | 7.00         | 17.14      | 1.00   | 22.00         | 0.00      | 5.00       | 1.00    | 10.00      | 40.00         | 1.00       |
| 1227.00 | 44.00 | 90.00  | 158.00 | 36.05   | 4.00  | 1.00      | 3.00      | 2.00           | 0.00    | 0.00         | 0.00   | 3.00   | 4.00         | 2.14       | 1.00   | 26.00         | 0.00      | 3.00       | 1.00    | 15.00      | 60.00         | 0.00       |
| 1228.00 | 37.00 | 115.00 | 186.00 | 33.24   | 4.00  | 0.00      | 3.00      | 3.00           | 0.00    | 0.00         | 1.00   | 3.00   | 7.00         | 17.14      | 1.00   | 34.00         | 1.00      | 4.00       | 1.00    | 15.00      | 60.00         | 0.00       |
| 1229.00 | 36.00 | 100.00 | 171.00 | 34.20   | 4.00  | 1.00      | 3.00      | 2.00           | 0.00    | 0.00         | 0.00   | 3.00   | 5.00         | 20.00      | 1.00   | 24.00         | 0.00      | 9.00       | 0.00    | 10.00      | 40.00         | 1.00       |
| 1230.00 | 40.00 | 80.00  | 163.00 | 30.11   | 4.00  | 1.00      | 3.00      | 2.00           | 0.00    | 0.00         | 0.00   | 3.00   | 5.00         | 0.00       | 1.00   | 27.00         | 0.00      | 4.00       | 1.00    | 16.00      | 64.00         | 0.00       |
| 1231.00 | 36.00 | 90.00  | 171.00 | 30.78   | 4.00  | 1.00      | 3.00      | 2.00           | 1.00    | 0.00         | 1.00   | 3.00   | 5.00         | 4.29       | 1.00   | 34.00         | 1.00      | 7.00       | 0.00    | 13.00      | 52.00         | 0.00       |
| 1232.00 | 41.00 | 95.00  | 175.00 | 31.02   | 4.00  | 1.00      | 3.00      | 2.00           | 0.00    | 0.00         | 1.00   | 3.00   | 8.00         | 25.71      | 1.00   | 34.00         | 1.00      | 6.00       | 0.00    | 15.00      | 60.00         | 0.00       |
| 1233.00 | 34.00 | 98.00  | 175.00 | 32.00   | 4.00  | 1.00      | 3.00      | 2.00           | 1.00    | 0.00         | 1.00   | 3.00   | 6.00         | 28.57      | 1.00   | 33.00         | 1.00      | 0.00       | 1.00    | 23.00      | 92.00         | 0.00       |
| 1234.00 | 35.00 | 98.00  | 169.00 | 34.31   | 4.00  | 1.00      | 3.00      | 2.00           | 0.00    | 0.00         | 1.00   | 3.00   | 9.00         | 19.29      | 1.00   | 31.00         | 1.00      | 5.00       | 1.00    | 15.00      | 60.00         | 0.00       |
| 1235.00 | 40.00 | 115.00 | 179.00 | 35.89   | 4.00  | 1.00      | 3.00      | 2.00           | 0.00    | 0.00         | 1.00   | 3.00   | 11.00        | 45.00      | 1.00   | 31.00         | 1.00      | 4.00       | 1.00    | 12.00      | 48.00         | 1.00       |
| 1236.00 | 43.00 | 90.00  | 167.00 | 32.27   | 4.00  | 1.00      | 3.00      | 2.00           | 0.00    | 1.00         | 0.00   | 1.00   | 6.00         | 0.71       | 1.00   | 23.00         | 0.00      | 10.00      | 0.00    | 9.00       | 36.00         | 1.00       |
| 1237.00 | 43.00 | 106.00 | 180.00 | 32.72   | 4.00  | 1.00      | 3.00      | 2.00           | 0.00    | 1.00         | 1.00   | 2.00   | 10.00        | 27.86      | 1.00   | 32.00         | 1.00      | 6.00       | 0.00    | 16.00      | 64.00         | 0.00       |
| 1238.00 | 38.00 | 115.00 | 174.00 | 37.98   | 4.00  | 0.00      | 3.00      | 2.00           | 0.00    | 1.00         | 1.00   | 2.00   | 6.00         | 51.43      | 1.00   | 32.00         | 1.00      | 5.00       | 1.00    | 12.00      | 48.00         | 1.00       |
| 1239.00 | 43.00 | 80.00  | 162.00 | 30.48   | 4.00  | 1.00      | 3.00      | 2.00           | 0.00    | 1.00         | 0.00   | 3.00   | 6.50         | 0.00       | 1.00   | 32.00         | 1.00      | 6.00       | 0.00    | 12.00      | 48.00         | 1.00       |
| 1240.00 | 39.00 | 82.00  | 156.00 | 33.69   | 4.00  | 1.00      | 3.00      | 2.00           | 0.00    | 1.00         | 0.00   | 3.00   | 9.00         | 0.00       | 1.00   | 24.00         | 0.00      | 7.00       | 0.00    | 11.00      | 44.00         | 1.00       |
| 1241.00 | 41.00 | 80.00  | 170.00 | 27.68   | 3.00  | 1.00      | 1.00      | 2.00           | 0.00    | 0.00         | 0.00   | 2.00   | 2.50         | 5.71       | 1.00   | 23.00         | 0.00      | 4.00       | 1.00    | 16.00      | 64.00         | 0.00       |
| 1242.00 | 40.00 | 123.00 | 204.00 | 29.56   | 3.00  | 0.00      | 2.00      | 2.00           | 0.00    | 0.00         | 1.00   | 3.00   | 9.00         | 21.57      | 1.00   | 27.00         | 0.00      | 4.00       | 1.00    | 9.00       | 36.00         | 1.00       |
| 1243.00 | 42.00 | 76.00  | 174.00 | 25.10</ |       |           |           |                |         |              |        |        |              |            |        |               |           |            |         |            |               |            |

| Subject | Age   | Weight | Height | BMI   | BMI_C | Residence | Education | Marital_Status | Smoking | Chronic_Dise | Gender | Health | Sitting_Time | PA_Min_Day | IPAQ_C | Dietary_Score | Dietary_C | PSQI_Total | Sleep_C | WHO5_Total | WHO5_Total100 | WHO5_Class |
|---------|-------|--------|--------|-------|-------|-----------|-----------|----------------|---------|--------------|--------|--------|--------------|------------|--------|---------------|-----------|------------|---------|------------|---------------|------------|
| 1255.00 | 35.00 | 95.00  | 189.00 | 26.60 | 3.00  | 1.00      | 3.00      | 2.00           | 0.00    | 0.00         | 1.00   | 3.00   | 5.50         | 53.57      | 1.00   | 28.00         | 0.00      | 3.00       | 1.00    | 13.00      | 52.00         | 0.00       |
| 1256.00 | 40.00 | 65.00  | 160.00 | 25.39 | 3.00  | 1.00      | 3.00      | 2.00           | 0.00    | 0.00         | 0.00   | 3.00   | 5.00         | 17.14      | 1.00   | 32.00         | 1.00      | 3.00       | 1.00    | 20.00      | 80.00         | 0.00       |
| 1257.00 | 40.00 | 73.00  | 160.00 | 28.52 | 3.00  | 1.00      | 3.00      | 2.00           | 0.00    | 0.00         | 0.00   | 3.00   | 4.00         | 31.43      | 1.00   | 33.00         | 1.00      | 5.00       | 1.00    | 18.00      | 72.00         | 0.00       |
| 1258.00 | 39.00 | 83.00  | 172.00 | 28.06 | 3.00  | 1.00      | 3.00      | 2.00           | 0.00    | 0.00         | 1.00   | 3.00   | 5.00         | 60.00      | 1.00   | 26.00         | 0.00      | 4.00       | 1.00    | 18.00      | 72.00         | 0.00       |
| 1259.00 | 43.00 | 85.00  | 172.00 | 28.73 | 3.00  | 1.00      | 3.00      | 2.00           | 0.00    | 0.00         | 1.00   | 3.00   | 3.00         | 33.57      | 1.00   | 37.00         | 1.00      | 1.00       | 1.00    | 15.00      | 60.00         | 0.00       |
| 1260.00 | 41.00 | 75.00  | 173.00 | 25.06 | 3.00  | 1.00      | 3.00      | 2.00           | 0.00    | 0.00         | 1.00   | 3.00   | 4.00         | 48.43      | 1.00   | 29.00         | 0.00      | 2.00       | 1.00    | 15.00      | 60.00         | 0.00       |
| 1261.00 | 38.00 | 80.00  | 176.00 | 25.83 | 3.00  | 1.00      | 3.00      | 1.00           | 0.00    | 0.00         | 0.00   | 3.00   | 6.50         | 25.71      | 1.00   | 20.00         | 0.00      | 2.00       | 1.00    | 12.00      | 48.00         | 1.00       |
| 1262.00 | 38.00 | 90.00  | 187.00 | 25.74 | 3.00  | 1.00      | 3.00      | 3.00           | 0.00    | 0.00         | 1.00   | 3.00   | 6.00         | 45.71      | 1.00   | 29.00         | 0.00      | 3.00       | 1.00    | 15.00      | 60.00         | 0.00       |
| 1263.00 | 38.00 | 78.00  | 170.00 | 26.99 | 3.00  | 1.00      | 3.00      | 2.00           | 0.00    | 0.00         | 0.00   | 3.00   | 4.00         | 34.29      | 1.00   | 31.00         | 1.00      | 0.00       | 1.00    | 14.00      | 56.00         | 0.00       |
| 1264.00 | 42.00 | 79.00  | 176.00 | 25.50 | 3.00  | 1.00      | 3.00      | 2.00           | 0.00    | 0.00         | 1.00   | 3.00   | 7.00         | 21.43      | 1.00   | 36.00         | 1.00      | 2.00       | 1.00    | 15.00      | 60.00         | 0.00       |
| 1265.00 | 41.00 | 90.00  | 180.00 | 27.78 | 3.00  | 1.00      | 3.00      | 3.00           | 0.00    | 0.00         | 1.00   | 3.00   | 6.00         | 4.29       | 1.00   | 29.00         | 0.00      | 6.00       | 0.00    | 16.00      | 64.00         | 0.00       |
| 1266.00 | 40.00 | 68.00  | 155.00 | 28.30 | 3.00  | 1.00      | 3.00      | 2.00           | 0.00    | 1.00         | 0.00   | 1.00   | 6.00         | 8.57       | 1.00   | 29.00         | 0.00      | 15.00      | 0.00    | 3.00       | 12.00         | 1.00       |
| 1267.00 | 43.00 | 90.00  | 174.00 | 29.73 | 3.00  | 1.00      | 3.00      | 2.00           | 0.00    | 1.00         | 1.00   | 1.00   | 5.00         | 5.71       | 1.00   | 28.00         | 0.00      | 2.00       | 1.00    | 10.00      | 40.00         | 1.00       |
| 1268.00 | 36.00 | 83.00  | 175.00 | 27.10 | 3.00  | 1.00      | 3.00      | 2.00           | 1.00    | 1.00         | 1.00   | 2.00   | 5.50         | 5.14       | 1.00   | 20.00         | 0.00      | 6.00       | 0.00    | 12.00      | 48.00         | 1.00       |
| 1269.00 | 40.00 | 90.00  | 174.00 | 29.73 | 3.00  | 1.00      | 3.00      | 2.00           | 1.00    | 1.00         | 1.00   | 2.00   | 2.50         | 22.86      | 1.00   | 32.00         | 1.00      | 6.00       | 0.00    | 13.00      | 52.00         | 0.00       |
| 1270.00 | 39.00 | 84.00  | 168.00 | 29.76 | 3.00  | 1.00      | 3.00      | 2.00           | 0.00    | 1.00         | 1.00   | 2.00   | 6.50         | 47.14      | 1.00   | 29.00         | 0.00      | 4.00       | 1.00    | 21.00      | 84.00         | 0.00       |
| 1271.00 | 44.00 | 86.00  | 181.00 | 26.25 | 3.00  | 1.00      | 3.00      | 3.00           | 1.00    | 1.00         | 1.00   | 2.00   | 3.00         | 47.14      | 1.00   | 33.00         | 1.00      | 3.00       | 1.00    | 23.00      | 92.00         | 0.00       |
| 1272.00 | 40.00 | 80.00  | 178.00 | 25.25 | 3.00  | 1.00      | 3.00      | 2.00           | 0.00    | 1.00         | 1.00   | 3.00   | 3.00         | 8.57       | 1.00   | 32.00         | 1.00      | 8.00       | 0.00    | 16.00      | 64.00         | 0.00       |
| 1273.00 | 43.00 | 76.00  | 163.00 | 28.60 | 3.00  | 1.00      | 3.00      | 1.00           | 0.00    | 1.00         | 0.00   | 3.00   | 7.00         | 20.00      | 1.00   | 26.00         | 0.00      | 1.00       | 1.00    | 14.00      | 56.00         | 0.00       |
| 1274.00 | 39.00 | 82.00  | 169.00 | 28.71 | 3.00  | 1.00      | 3.00      | 2.00           | 0.00    | 1.00         | 1.00   | 3.00   | 7.00         | 24.29      | 1.00   | 30.00         | 1.00      | 4.00       | 1.00    | 15.00      | 60.00         | 0.00       |
| 1275.00 | 39.00 | 94.00  | 182.00 | 28.38 | 3.00  | 1.00      | 3.00      | 2.00           | 0.00    | 1.00         | 1.00   | 3.00   | 7.00         | 17.14      | 1.00   | 29.00         | 0.00      | 5.00       | 1.00    | 17.00      | 68.00         | 0.00       |
| 1276.00 | 39.00 | 54.00  | 157.00 | 21.91 | 2.00  | 1.00      | 3.00      | 2.00           | 0.00    | 0.00         | 0.00   | 2.00   | 5.00         | 21.43      | 1.00   | 30.00         | 1.00      | 4.00       | 1.00    | 11.00      | 44.00         | 1.00       |
| 1277.00 | 38.00 | 55.00  | 153.00 | 23.50 | 2.00  | 1.00      | 3.00      | 2.00           | 0.00    | 0.00         | 0.00   | 2.00   | 6.50         | 0.71       | 1.00   | 35.00         | 1.00      | 1.00       | 1.00    | 15.00      | 60.00         | 0.00       |
| 1278.00 | 39.00 | 70.00  | 174.00 | 23.12 | 2.00  | 1.00      | 3.00      | 2.00           | 0.00    | 0.00         | 1.00   | 3.00   | 5.00         | 17.14      | 1.00   | 29.00         | 0.00      | 4.00       | 1.00    | 10.00      | 40.00         | 1.00       |
| 1279.00 | 38.00 | 67.00  | 178.00 | 21.15 | 2.00  | 1.00      | 3.00      | 2.00           | 0.00    | 0.00         | 1.00   | 3.00   | 8.00         | 51.43      | 1.00   | 23.00         | 0.00      | 7.00       | 0.00    | 8.00       | 32.00         | 1.00       |
| 1280.00 | 38.00 | 65.00  | 165.00 | 23.88 | 2.00  | 1.00      | 3.00      | 2.00           | 0.00    | 0.00         | 0.00   | 3.00   | 7.00         | 10.71      | 1.00   | 18.00         | 0.00      | 4.00       | 1.00    | 15.00      | 60.00         | 0.00       |
| 1281.00 | 34.00 | 67.00  | 165.00 | 24.61 | 2.00  | 1.00      | 3.00      | 2.00           | 0.00    | 0.00         | 0.00   | 3.00   | 5.00         | 34.29      | 1.00   | 37.00         | 1.00      | 4.00       | 1.00    | 14.00      | 56.00         | 0.00       |
| 1282.00 | 43.00 | 50.00  | 156.00 | 20.55 | 2.00  | 1.00      | 3.00      | 2.00           | 0.00    | 0.00         | 0.00   | 3.00   | 4.00         | 8.57       | 1.00   | 29.00         | 0.00      | 5.00       | 1.00    | 14.00      | 56.00         | 0.00       |
| 1283.00 | 39.00 | 70.00  | 169.00 | 24.51 | 2.00  | 1.00      | 3.00      | 2.00           | 0.00    | 0.00         | 0.00   | 3.00   | 7.00         | 34.29      | 1.00   | 28.00         | 0.00      | 5.00       | 1.00    | 15.00      | 60.00         | 0.00       |
| 1284.00 | 38.00 | 60.00  | 165.00 | 22.04 | 2.00  | 1.00      | 3.00      | 2.00           | 0.00    | 0.00         | 0.00   | 3.00   | 7.00         | 5.71       | 1.00   | 30.00         | 1.00      | 6.00       | 0.00    | 15.00      | 60.00         | 0.00       |
| 1285.00 | 35.00 | 58.00  | 158.00 | 23.23 | 2.00  | 1.00      | 3.00      | 1.00           | 0.00    | 0.00         | 0.00   | 3.00   | 6.00         | 12.86      | 1.00   | 35.00         | 1.00      | 0.00       | 1.00    | 16.00      | 64.00         | 0.00       |
| 1286.00 | 44.00 | 67.00  | 180.00 | 20.68 | 2.00  | 1.00      | 3.00      | 1.00           | 0.00    | 0.00         | 0.00   | 3.00   | 8.00         | 40.00      | 1.00   | 29.00         | 0.00      | 1.00       | 1.00    | 16.00      | 64.00         | 0.00       |
| 1287.00 | 36.00 | 62.00  | 167.00 | 22.23 | 2.00  | 1.00      | 3.00      | 2.00           | 0.00    | 0.00         | 1.00   | 3.00   | 8.00         | 50.00      | 1.00   | 34.00         | 1.00      | 4.00       | 1.00    | 13.00      | 52.00         | 0.00       |
| 1288.00 | 43.00 | 74.00  | 174.00 | 24.44 | 2.00  | 1.00      | 3.00      | 2.00           | 1.00    | 0.00         | 1.00   | 3.00   | 2.50         | 19.29      | 1.00   | 29.00         | 0.00      | 3.00       | 1.00    | 13.00      | 52.00         | 0.00       |
| 1289.00 | 40.00 | 75.00  | 174.00 | 24.77 | 2.00  | 1.00      | 3.00      | 2.00           | 0.00    | 0.00         | 1.00   | 3.00   | 4.00         | 28.57      | 1.00   | 29.00         | 0.00      | 4.00       | 1.00    | 16.00      | 64.00         | 0.00       |
| 1290.00 | 37.00 | 79.00  | 185.00 | 23.08 | 2.00  | 1.00      | 3.00      | 2.00           | 0.00    | 0.00         | 1.00   | 3.00   | 9.00         | 27.86      | 1.00   | 31.00         | 1.00      | 2.00       | 1.00    | 16.00      | 64.00         | 0.00       |
| 1291.00 | 40.00 | 90.00  | 190.00 | 24.93 | 2.00  | 0.00      | 3.00      | 1.00           | 0.00    | 0.00         | 1.00   | 3.00   | 4.00         | 21.43      | 1.00   | 32.00         | 1.00      | 5.00       | 1.00    | 16.00      | 64.00         | 0.00       |
| 1292.00 | 35.00 | 61.00  | 160.00 | 23.83 | 2.00  | 1.00      | 3.00      | 2.00           | 0.00    | 1.00         | 0.00   | 1.00   | 8.00         | 0.00       | 1.00   | 35.00         | 1.00      | 6.00       | 0.00    | 3.00       | 12.00         | 1.00       |
| 1293.00 | 41.00 | 74.00  | 181.00 | 22.59 | 2.00  | 1.00      | 3.00      | 2.00           | 0.00    | 1.00         | 1.00   | 2.00   | 5.00         | 20.00      | 1.00   | 29.00         | 0.00      | 11.00      | 0.00    | 11.00      | 44.00         | 1.00       |
| 1294.00 | 42.00 | 72.00  | 187.00 | 20.59 | 2.00  | 1.00      | 3.00      | 2.00           | 0.00    | 1.00         | 1.00   | 2.00   | 4.00         | 53.71      | 1.00   | 27.00         | 0.00      | 14.00      | 0.00    | 12.00      | 48.00         | 1.00       |
| 1295.00 | 40.00 | 78.00  | 178.00 | 24.62 | 2.00  | 0.00      | 3.00      | 2.00           | 1.00    | 1.00         | 1.00   | 2.00   | 8.00         | 30.00      | 1.00   | 31.00         | 1.00      | 5.00       | 1.00    | 19.00      | 76.00         | 0.00       |
| 1296.00 | 38.00 | 74.00  | 178.00 | 23.36 | 2.00  | 1.00      | 3.00      | 2.00           | 1.00    | 1.00         | 1.00   | 2.00   | 8.00         | 34.29      | 1.00   | 30.00         | 1.00      | 6.00       | 0.00    | 15.00      | 60.00         | 0.00       |
| 1297.00 | 40.00 | 58.00  | 168.00 | 20.55 | 2.00  | 1.00      | 3.00      | 2.00           | 0.00    | 1.00         | 0.00   | 3.00   | 5.00         | 42.86      | 1.00   | 34.00         | 1.00      | 2.00       | 1.00    | 16.00      | 64.00         | 0.00       |
| 1298.00 | 40.00 | 86.00  | 159.00 | 34.02 | 4.00  | 1.00      | 3.00      | 2.00           | 0.00    | 0.00         | 0.00   | 3.00   | 2.50         | 4.29       | 1.00   | 33.00         | 1.00      | 11.00      | 0.00    | 9.00       | 36.00         | 1.00       |
| 1299.00 | 37.00 | 85.00  | 175.00 | 27.76 | 3.00  | 1.00      | 3.00      | 2.00           | 0.00    | 0.00         | 1.00   | 2.00   | 6.00         | 17.14      | 1.00   | 31.00         | 1.00      | 1.00       | 1.00    | 13.00      | 52.00         | 0.00       |
| 1300.00 | 41.00 | 97.00  | 185.00 | 28.34 | 3.00  | 1.00      | 3.00      | 2.00           | 0.00    | 0.00         | 1.00   | 3.00   | 7.00         | 4.29       | 1.00   | 34.00         | 1.00      | 2.00       | 1.00    | 14.00      | 56.00         | 0.00       |
| 1301.00 | 34.00 | 60.00  | 162.00 | 22.86 | 2.00  | 1.00      | 3.00      | 2.00           | 0.00    | 0.00         | 0.00   | 3.00   | 9.00         | 60.00      | 1.00   | 37.00         | 1.00      | 4.00       | 1.00    | 15.00      | 60.00         | 0.00       |
| 1302.00 | 42.00 | 82.00  | 165.00 | 30.12 | 4.00  | 1.00      | 2.00      | 2.00           | 0.00    | 0.00         | 0.00   | 3.00   | 6.50         | 47.14      | 1.00   | 30.00         | 1.00      | 3.00       | 1.00    | 13.00      | 52.00         | 0.00       |
| 1303.00 | 35.00 | 93.00  | 170.00 | 32.18 | 4.00  | 0.00      | 2.00      | 2.00           | 0.00    | 0.00         | 0.00   | 3.00   | 3.00         | 15.71      | 1.00   | 34.00         | 1.00      | 5.00       | 1.00    | 19.00      | 76.00         | 0.00       |
| 1304.00 | 44.00 | 94.00  | 172.00 | 31.77 | 4.00  | 1.00      | 2.00      | 3.00           | 0.00    | 0.00         | 0.00   | 1.00   | 11.00        | 0.00       | 1.00   | 28.00         | 0.00      | 7.00       | 0.00    | 9.00       | 36.00         | 1.00       |
| 1305.00 | 35.00 | 92.00  | 175.00 | 30.04 | 4.00  | 0.00      | 2.00      | 2.00           | 0.00    | 0.00         | 0.00   | 2.00   | 10.00        | 12.86      | 1.00   | 16.00         | 0.00      | 14.00      | 0.00    | 7.00       | 28.00         | 1.00       |
| 1306.00 | 40.00 | 88.00  | 170.00 | 30.45 | 4.00  | 0.00      | 2.00      | 2.00           | 0.00    | 0.00         | 1.00   | 2.00   | 2.50         | 57.14      | 1.00   | 34.00         | 1.00      | 5.00       | 1.00    | 15.00      | 60.00         | 0.00       |
| 1307.00 | 42.00 | 75.00  | 156.00 | 30.82 | 4.00  | 1.00      | 2.00      | 2.00           | 0.00    | 0.00         | 0.00   | 3.00   | 6.00         | 11.43      | 1.00   | 33.00         | 1.00      | 8.00       | 0.00    | 6.00       | 24.00         | 1.00       |
| 1308.00 | 35.00 | 74.00  | 157.00 | 30.02 | 4.00  | 0.00      | 2.00      | 1.00           | 0.00    | 0.00         | 0.00   | 3.00   | 4.00         | 4.29       | 1.00   | 27.00         | 0.00      | 4.00       | 1.00    | 13.00      | 52.00         | 0.00       |
| 1309.00 | 35.00 | 105.00 | 157.00 | 42.60 |       |           |           |                |         |              |        |        |              |            |        |               |           |            |         |            |               |            |

| Subject | Age   | Weight | Height | BMI   | BMI_C | Residence | Education | Marital_Status | Smoking | Chronic_Dise | Gender | Health | Sitting_Time | PA_Min_Day | IPAQ_C | Dietary_Score | Dietary_C | PSQI_Total | Sleep_C | WHO5_Total | WHO5_Total100 | WHO5_Class |
|---------|-------|--------|--------|-------|-------|-----------|-----------|----------------|---------|--------------|--------|--------|--------------|------------|--------|---------------|-----------|------------|---------|------------|---------------|------------|
| 1321.00 | 39.00 | 108.00 | 174.00 | 35.67 | 4.00  | 1.00      | 2.00      | 2.00           | 0.00    | 1.00         | 1.00   | 3.00   | 6.00         | 15.00      | 1.00   | 27.00         | 0.00      | 8.00       | 0.00    | 15.00      | 60.00         | 0.00       |
| 1322.00 | 44.00 | 107.00 | 180.00 | 33.02 | 4.00  | 0.00      | 3.00      | 2.00           | 0.00    | 0.00         | 1.00   | 1.00   | 6.00         | 0.00       | 1.00   | 35.00         | 1.00      | 7.00       | 0.00    | 13.00      | 52.00         | 0.00       |
| 1323.00 | 43.00 | 90.00  | 162.00 | 34.29 | 4.00  | 1.00      | 3.00      | 2.00           | 0.00    | 1.00         | 0.00   | 1.00   | 7.00         | 0.00       | 1.00   | 35.00         | 1.00      | 0.00       | 1.00    | 14.00      | 56.00         | 0.00       |
| 1324.00 | 42.00 | 100.00 | 175.00 | 32.65 | 4.00  | 1.00      | 3.00      | 2.00           | 1.00    | 1.00         | 1.00   | 2.00   | 8.00         | 17.14      | 1.00   | 25.00         | 0.00      | 7.00       | 0.00    | 12.00      | 48.00         | 1.00       |
| 1325.00 | 40.00 | 83.00  | 170.00 | 28.72 | 3.00  | 1.00      | 2.00      | 2.00           | 1.00    | 0.00         | 0.00   | 2.00   | 1.50         | 3.57       | 1.00   | 22.00         | 0.00      | 10.00      | 0.00    | 7.00       | 28.00         | 1.00       |
| 1326.00 | 40.00 | 95.00  | 180.00 | 29.32 | 3.00  | 1.00      | 2.00      | 2.00           | 0.00    | 0.00         | 1.00   | 2.00   | 6.00         | 25.71      | 1.00   | 29.00         | 0.00      | 5.00       | 1.00    | 11.00      | 44.00         | 1.00       |
| 1327.00 | 39.00 | 67.00  | 158.00 | 26.84 | 3.00  | 1.00      | 2.00      | 2.00           | 0.00    | 0.00         | 0.00   | 2.00   | 2.00         | 0.00       | 1.00   | 29.00         | 0.00      | 7.00       | 0.00    | 12.00      | 48.00         | 1.00       |
| 1328.00 | 37.00 | 62.00  | 150.00 | 27.56 | 3.00  | 1.00      | 2.00      | 2.00           | 1.00    | 0.00         | 0.00   | 2.00   | 6.50         | 0.00       | 1.00   | 20.00         | 0.00      | 5.00       | 1.00    | 13.00      | 52.00         | 0.00       |
| 1329.00 | 40.00 | 70.00  | 156.00 | 28.76 | 3.00  | 1.00      | 2.00      | 2.00           | 0.00    | 0.00         | 0.00   | 3.00   | 1.50         | 2.14       | 1.00   | 20.00         | 0.00      | 9.00       | 0.00    | 13.00      | 52.00         | 0.00       |
| 1330.00 | 35.00 | 70.00  | 165.00 | 25.71 | 3.00  | 1.00      | 2.00      | 2.00           | 0.00    | 0.00         | 0.00   | 3.00   | 8.00         | 37.14      | 1.00   | 31.00         | 1.00      | 5.00       | 1.00    | 15.00      | 60.00         | 0.00       |
| 1331.00 | 42.00 | 82.00  | 181.00 | 25.03 | 3.00  | 1.00      | 2.00      | 2.00           | 0.00    | 0.00         | 1.00   | 3.00   | 9.00         | 17.14      | 1.00   | 22.00         | 0.00      | 4.00       | 1.00    | 15.00      | 60.00         | 0.00       |
| 1332.00 | 37.00 | 80.00  | 165.00 | 29.38 | 3.00  | 1.00      | 2.00      | 2.00           | 0.00    | 0.00         | 0.00   | 3.00   | 9.00         | 12.86      | 1.00   | 23.00         | 0.00      | 6.00       | 0.00    | 9.00       | 36.00         | 1.00       |
| 1333.00 | 41.00 | 70.00  | 153.00 | 29.90 | 3.00  | 1.00      | 2.00      | 2.00           | 0.00    | 0.00         | 0.00   | 3.00   | 3.50         | 17.14      | 1.00   | 33.00         | 1.00      | 3.00       | 1.00    | 13.00      | 52.00         | 0.00       |
| 1334.00 | 40.00 | 64.00  | 150.00 | 28.44 | 3.00  | 1.00      | 2.00      | 2.00           | 0.00    | 0.00         | 0.00   | 3.00   | 5.50         | 2.14       | 1.00   | 31.00         | 1.00      | 6.00       | 0.00    | 9.00       | 36.00         | 1.00       |
| 1335.00 | 44.00 | 76.00  | 170.00 | 26.30 | 3.00  | 1.00      | 2.00      | 3.00           | 0.00    | 0.00         | 1.00   | 3.00   | 6.00         | 17.14      | 1.00   | 25.00         | 0.00      | 6.00       | 0.00    | 16.00      | 64.00         | 0.00       |
| 1336.00 | 35.00 | 79.00  | 173.00 | 26.40 | 3.00  | 1.00      | 2.00      | 2.00           | 0.00    | 0.00         | 1.00   | 3.00   | 7.00         | 18.57      | 1.00   | 32.00         | 1.00      | 4.00       | 1.00    | 13.00      | 52.00         | 0.00       |
| 1337.00 | 40.00 | 70.00  | 165.00 | 25.71 | 3.00  | 1.00      | 2.00      | 2.00           | 0.00    | 0.00         | 0.00   | 3.00   | 7.00         | 8.57       | 1.00   | 30.00         | 1.00      | 4.00       | 1.00    | 12.00      | 48.00         | 1.00       |
| 1338.00 | 34.00 | 70.00  | 164.00 | 26.03 | 3.00  | 1.00      | 2.00      | 2.00           | 0.00    | 0.00         | 0.00   | 3.00   | 5.50         | 31.43      | 1.00   | 30.00         | 1.00      | 3.00       | 1.00    | 15.00      | 60.00         | 0.00       |
| 1339.00 | 39.00 | 82.00  | 174.00 | 27.08 | 3.00  | 0.00      | 2.00      | 2.00           | 0.00    | 0.00         | 1.00   | 3.00   | 5.00         | 11.43      | 1.00   | 20.00         | 0.00      | 3.00       | 1.00    | 13.00      | 52.00         | 0.00       |
| 1340.00 | 42.00 | 90.00  | 180.00 | 27.78 | 3.00  | 1.00      | 2.00      | 2.00           | 1.00    | 1.00         | 1.00   | 1.00   | 4.00         | 34.29      | 1.00   | 27.00         | 0.00      | 7.00       | 0.00    | 8.00       | 32.00         | 1.00       |
| 1341.00 | 34.00 | 77.00  | 165.00 | 28.28 | 3.00  | 1.00      | 2.00      | 2.00           | 0.00    | 1.00         | 0.00   | 2.00   | 9.00         | 0.00       | 1.00   | 29.00         | 0.00      | 6.00       | 0.00    | 4.00       | 16.00         | 1.00       |
| 1342.00 | 37.00 | 85.00  | 180.00 | 26.23 | 3.00  | 1.00      | 2.00      | 1.00           | 0.00    | 1.00         | 1.00   | 3.00   | 7.00         | 0.00       | 1.00   | 33.00         | 1.00      | 9.00       | 0.00    | 10.00      | 40.00         | 1.00       |
| 1343.00 | 39.00 | 84.00  | 170.00 | 29.07 | 3.00  | 0.00      | 2.00      | 2.00           | 0.00    | 1.00         | 1.00   | 3.00   | 2.50         | 17.14      | 1.00   | 34.00         | 1.00      | 5.00       | 1.00    | 21.00      | 84.00         | 0.00       |
| 1344.00 | 39.00 | 80.00  | 167.00 | 28.69 | 3.00  | 0.00      | 3.00      | 3.00           | 1.00    | 0.00         | 1.00   | 1.00   | 9.00         | 36.43      | 1.00   | 35.00         | 1.00      | 8.00       | 0.00    | 9.00       | 36.00         | 1.00       |
| 1345.00 | 39.00 | 73.00  | 161.00 | 28.16 | 3.00  | 1.00      | 3.00      | 2.00           | 0.00    | 0.00         | 0.00   | 2.00   | 5.00         | 4.29       | 1.00   | 31.00         | 1.00      | 11.00      | 0.00    | 12.00      | 48.00         | 1.00       |
| 1346.00 | 40.00 | 90.00  | 180.00 | 27.78 | 3.00  | 1.00      | 3.00      | 2.00           | 0.00    | 0.00         | 1.00   | 2.00   | 4.00         | 41.43      | 1.00   | 38.00         | 1.00      | 3.00       | 1.00    | 14.00      | 56.00         | 0.00       |
| 1347.00 | 38.00 | 68.00  | 162.00 | 25.91 | 3.00  | 1.00      | 3.00      | 1.00           | 0.00    | 0.00         | 0.00   | 2.00   | 6.00         | 55.71      | 1.00   | 35.00         | 1.00      | 1.00       | 1.00    | 15.00      | 60.00         | 0.00       |
| 1348.00 | 35.00 | 70.00  | 165.00 | 25.71 | 3.00  | 1.00      | 3.00      | 1.00           | 0.00    | 0.00         | 0.00   | 3.00   | 5.00         | 17.14      | 1.00   | 37.00         | 1.00      | 4.00       | 1.00    | 7.00       | 28.00         | 1.00       |
| 1349.00 | 43.00 | 74.00  | 160.00 | 28.91 | 3.00  | 1.00      | 3.00      | 3.00           | 0.00    | 0.00         | 0.00   | 3.00   | 11.00        | 8.57       | 1.00   | 23.00         | 0.00      | 2.00       | 1.00    | 13.00      | 52.00         | 0.00       |
| 1350.00 | 43.00 | 73.00  | 168.00 | 25.86 | 3.00  | 1.00      | 3.00      | 2.00           | 0.00    | 1.00         | 1.00   | 3.00   | 8.00         | 17.14      | 1.00   | 28.00         | 0.00      | 4.00       | 1.00    | 18.00      | 72.00         | 0.00       |
| 1351.00 | 35.00 | 83.00  | 170.00 | 28.72 | 3.00  | 0.00      | 3.00      | 2.00           | 0.00    | 1.00         | 1.00   | 3.00   | 4.50         | 15.00      | 1.00   | 33.00         | 1.00      | 5.00       | 1.00    | 19.00      | 76.00         | 0.00       |
| 1352.00 | 40.00 | 51.00  | 158.00 | 20.43 | 2.00  | 0.00      | 1.00      | 2.00           | 1.00    | 0.00         | 0.00   | 2.00   | 3.00         | 24.29      | 1.00   | 27.00         | 0.00      | 0.00       | 1.00    | 17.00      | 68.00         | 0.00       |
| 1353.00 | 38.00 | 53.00  | 163.00 | 19.95 | 2.00  | 1.00      | 2.00      | 2.00           | 0.00    | 0.00         | 0.00   | 3.00   | 7.00         | 11.43      | 1.00   | 31.00         | 1.00      | 13.00      | 0.00    | 11.00      | 44.00         | 1.00       |
| 1354.00 | 39.00 | 58.00  | 163.00 | 21.83 | 2.00  | 0.00      | 2.00      | 2.00           | 0.00    | 0.00         | 0.00   | 1.00   | 8.00         | 0.00       | 1.00   | 26.00         | 0.00      | 2.00       | 1.00    | 9.00       | 36.00         | 1.00       |
| 1355.00 | 36.00 | 58.00  | 158.00 | 23.23 | 2.00  | 0.00      | 2.00      | 1.00           | 1.00    | 0.00         | 0.00   | 2.00   | 8.00         | 21.43      | 1.00   | 27.00         | 0.00      | 6.00       | 0.00    | 7.00       | 28.00         | 1.00       |
| 1356.00 | 40.00 | 70.00  | 171.00 | 23.94 | 2.00  | 1.00      | 2.00      | 2.00           | 0.00    | 0.00         | 0.00   | 2.00   | 8.00         | 57.29      | 1.00   | 25.00         | 0.00      | 9.00       | 0.00    | 12.00      | 48.00         | 1.00       |
| 1357.00 | 43.00 | 80.00  | 182.00 | 24.15 | 2.00  | 1.00      | 2.00      | 2.00           | 0.00    | 0.00         | 1.00   | 3.00   | 6.00         | 47.14      | 1.00   | 20.00         | 0.00      | 7.00       | 0.00    | 12.00      | 48.00         | 1.00       |
| 1358.00 | 36.00 | 62.00  | 160.00 | 24.22 | 2.00  | 1.00      | 2.00      | 3.00           | 1.00    | 0.00         | 1.00   | 3.00   | 7.00         | 34.29      | 1.00   | 33.00         | 1.00      | 2.00       | 1.00    | 16.00      | 64.00         | 0.00       |
| 1359.00 | 37.00 | 87.00  | 187.00 | 24.88 | 2.00  | 1.00      | 2.00      | 2.00           | 0.00    | 0.00         | 1.00   | 3.00   | 3.00         | 22.86      | 1.00   | 40.00         | 1.00      | 6.00       | 0.00    | 15.00      | 60.00         | 0.00       |
| 1360.00 | 38.00 | 68.00  | 175.00 | 22.20 | 2.00  | 1.00      | 2.00      | 2.00           | 0.00    | 0.00         | 0.00   | 3.00   | 1.50         | 17.14      | 1.00   | 40.00         | 1.00      | 3.00       | 1.00    | 15.00      | 60.00         | 0.00       |
| 1361.00 | 42.00 | 77.00  | 178.00 | 24.30 | 2.00  | 1.00      | 2.00      | 2.00           | 1.00    | 0.00         | 1.00   | 3.00   | 5.00         | 64.29      | 1.00   | 32.00         | 1.00      | 3.00       | 1.00    | 13.00      | 52.00         | 0.00       |
| 1362.00 | 34.00 | 60.00  | 165.00 | 22.04 | 2.00  | 1.00      | 2.00      | 2.00           | 0.00    | 0.00         | 0.00   | 3.00   | 6.00         | 0.00       | 1.00   | 21.00         | 0.00      | 7.00       | 0.00    | 17.00      | 68.00         | 0.00       |
| 1363.00 | 36.00 | 56.00  | 158.00 | 22.43 | 2.00  | 0.00      | 2.00      | 2.00           | 0.00    | 1.00         | 0.00   | 1.00   | 3.00         | 12.86      | 1.00   | 30.00         | 1.00      | 8.00       | 0.00    | 12.00      | 48.00         | 1.00       |
| 1364.00 | 40.00 | 55.00  | 160.00 | 21.48 | 2.00  | 1.00      | 2.00      | 2.00           | 0.00    | 1.00         | 0.00   | 1.00   | 4.50         | 8.57       | 1.00   | 22.00         | 0.00      | 4.00       | 1.00    | 9.00       | 36.00         | 1.00       |
| 1365.00 | 37.00 | 65.00  | 169.00 | 22.76 | 2.00  | 1.00      | 2.00      | 2.00           | 1.00    | 1.00         | 0.00   | 3.00   | 4.00         | 21.43      | 1.00   | 28.00         | 0.00      | 9.00       | 0.00    | 10.00      | 40.00         | 1.00       |
| 1366.00 | 42.00 | 65.00  | 164.00 | 24.17 | 2.00  | 1.00      | 2.00      | 2.00           | 0.00    | 1.00         | 1.00   | 3.00   | 3.50         | 0.00       | 1.00   | 24.00         | 0.00      | 11.00      | 0.00    | 9.00       | 36.00         | 1.00       |
| 1367.00 | 42.00 | 92.00  | 192.00 | 24.96 | 2.00  | 1.00      | 3.00      | 2.00           | 0.00    | 0.00         | 1.00   | 2.00   | 4.00         | 25.00      | 1.00   | 21.00         | 0.00      | 7.00       | 0.00    | 14.00      | 56.00         | 0.00       |
| 1368.00 | 39.00 | 58.00  | 160.00 | 22.66 | 2.00  | 1.00      | 3.00      | 2.00           | 0.00    | 0.00         | 0.00   | 3.00   | 6.00         | 15.71      | 1.00   | 24.00         | 0.00      | 3.00       | 1.00    | 13.00      | 52.00         | 0.00       |
| 1369.00 | 36.00 | 58.00  | 163.00 | 21.83 | 2.00  | 1.00      | 3.00      | 1.00           | 0.00    | 0.00         | 0.00   | 3.00   | 10.00        | 0.00       | 1.00   | 38.00         | 1.00      | 3.00       | 1.00    | 19.00      | 76.00         | 0.00       |
| 1370.00 | 40.00 | 66.00  | 165.00 | 24.24 | 2.00  | 0.00      | 3.00      | 3.00           | 1.00    | 0.00         | 0.00   | 3.00   | 11.00        | 5.71       | 1.00   | 37.00         | 1.00      | 4.00       | 1.00    | 20.00      | 80.00         | 0.00       |
| 1371.00 | 35.00 | 65.00  | 175.00 | 21.22 | 2.00  | 1.00      | 3.00      | 2.00           | 1.00    | 0.00         | 1.00   | 3.00   | 7.00         | 0.00       | 1.00   | 27.00         | 0.00      | 1.00       | 1.00    | 17.00      | 68.00         | 0.00       |
| 1372.00 | 39.00 | 62.00  | 163.00 | 23.34 | 2.00  | 0.00      | 3.00      | 2.00           | 0.00    | 0.00         | 0.00   | 3.00   | 3.00         | 53.57      | 1.00   | 28.00         | 0.00      | 3.00       | 1.00    | 15.00      | 60.00         | 0.00       |
| 1373.00 | 36.00 | 62.50  | 164.00 | 23.24 | 2.00  | 1.00      | 3.00      | 2.00           | 0.00    | 0.00         | 0.00   | 3.00   | 5.00         | 68.57      | 1.00   | 29.00         | 0.00      | 7.00       | 0.00    | 15.00      | 60.00         | 0.00       |
| 1374.00 | 42.00 | 70.00  | 170.00 | 24.22 | 2.00  | 1.00      | 3.00      | 2.00           | 0.00    | 1.00         | 0.00   | 3.00   | 5.00         | 37.14      | 1.00   | 33.00         | 1.00      | 4.00       | 1.00    | 15.00      | 60.00         | 0.00       |
| 1375.00 | 38.00 | 91.00  | 160.00 | 35.55 | 4.00  |           |           |                |         |              |        |        |              |            |        |               |           |            |         |            |               |            |

| Subject | Age   | Weight | Height   | BMI   | BMI_C | Residence | Education | Marital_Status | Smoking | Chronic_Dise | Gender | Health | Sitting_Time | PA_Min_Day | IPAQ_C | Dietary_Score | Dietary_C | PSQI_Total | Sleep_C | WHO5_Total | WHO5_Total100 | WHO5_Class |
|---------|-------|--------|----------|-------|-------|-----------|-----------|----------------|---------|--------------|--------|--------|--------------|------------|--------|---------------|-----------|------------|---------|------------|---------------|------------|
| 1387.00 | 47.00 | 74.00  | 166.00   | 26.85 | 3.00  | 1.00      | 2.00      | 2.00           | 0.00    | 0.00         | 0.00   | 3.00   | 11.00        | 0.00       | 1.00   | 23.00         | 0.00      | 3.00       | 1.00    | 16.00      | 64.00         | 0.00       |
| 1388.00 | 52.00 | 76.00  | 172.00   | 25.69 | 3.00  | 1.00      | 2.00      | 2.00           | 0.00    | 0.00         | 1.00   | 3.00   | 5.00         | 23.57      | 1.00   | 30.00         | 1.00      | 4.00       | 1.00    | 18.00      | 72.00         | 0.00       |
| 1389.00 | 58.00 | 86.00  | 180.00   | 26.54 | 3.00  | 1.00      | 2.00      | 2.00           | 0.00    | 0.00         | 1.00   | 3.00   | 5.50         | 18.57      | 1.00   | 28.00         | 0.00      | 3.00       | 1.00    | 19.00      | 76.00         | 0.00       |
| 1390.00 | 50.00 | 90.00  | 175.00   | 29.39 | 3.00  | 1.00      | 2.00      | 2.00           | 0.00    | 0.00         | 0.00   | 3.00   | 8.00         | 25.71      | 1.00   | 36.00         | 1.00      | 4.00       | 1.00    | 13.00      | 52.00         | 0.00       |
| 1391.00 | 58.00 | 85.00  | 172.00   | 28.73 | 3.00  | 1.00      | 3.00      | 2.00           | 1.00    | 1.00         | 1.00   | 2.00   | 6.00         | 11.43      | 1.00   | 30.00         | 1.00      | 9.00       | 0.00    | 9.00       | 36.00         | 1.00       |
| 1392.00 | 50.00 | 100.00 | 185.00   | 29.22 | 3.00  | 1.00      | 3.00      | 2.00           | 1.00    | 1.00         | 1.00   | 2.00   | 8.00         | 42.86      | 1.00   | 31.00         | 1.00      | 4.00       | 1.00    | 12.00      | 48.00         | 1.00       |
| 1393.00 | 48.00 | 69.00  | 171.00   | 23.60 | 2.00  | 1.00      | 3.00      | 3.00           | 1.00    | 0.00         | 1.00   | 3.00   | 10.00        | 28.57      | 1.00   | 18.00         | 0.00      | 7.00       | 0.00    | 15.00      | 60.00         | 0.00       |
| 1394.00 | 45.00 | 87.00  | 168.00   | 30.82 | 4.00  | 1.00      | 1.00      | 2.00           | 0.00    | 1.00         | 1.00   | 1.00   | 9.00         | 6.43       | 1.00   | 38.00         | 1.00      | 8.00       | 0.00    | 9.00       | 36.00         | 1.00       |
| 1395.00 | 56.00 | 90.00  | 173.00   | 30.07 | 4.00  | 1.00      | 2.00      | 2.00           | 0.00    | 1.00         | 1.00   | 1.00   | 7.00         | 51.43      | 1.00   | 25.00         | 0.00      | 8.00       | 0.00    | 9.00       | 36.00         | 1.00       |
| 1396.00 | 53.00 | 106.00 | 183.00   | 31.65 | 4.00  | 1.00      | 2.00      | 2.00           | 0.00    | 0.00         | 1.00   | 3.00   | 5.00         | 12.86      | 1.00   | 29.00         | 0.00      | 9.00       | 0.00    | 9.00       | 36.00         | 1.00       |
| 1397.00 | 45.00 | 120.00 | 183.00   | 35.83 | 4.00  | 1.00      | 2.00      | 2.00           | 0.00    | 0.00         | 1.00   | 3.00   | 9.00         | 0.00       | 1.00   | 21.00         | 0.00      | 5.00       | 1.00    | 10.00      | 40.00         | 1.00       |
| 1398.00 | 55.00 | 108.00 | 186.00   | 31.22 | 4.00  | 1.00      | 2.00      | 2.00           | 1.00    | 0.00         | 1.00   | 3.00   | 6.00         | 42.86      | 1.00   | 35.00         | 1.00      | 5.00       | 1.00    | 16.00      | 64.00         | 0.00       |
| 1399.00 | 45.00 | 100.00 | 176.00   | 32.28 | 4.00  | 1.00      | 2.00      | 2.00           | 0.00    | 1.00         | 1.00   | 1.00   | 7.00         | 0.00       | 1.00   | 26.00         | 0.00      | 5.00       | 1.00    | 17.00      | 68.00         | 0.00       |
| 1400.00 | 50.00 | 120.00 | 177.00   | 38.30 | 4.00  | 1.00      | 2.00      | 2.00           | 0.00    | 1.00         | 0.00   | 2.00   | 4.50         | 51.43      | 1.00   | 40.00         | 1.00      | 6.00       | 0.00    | 12.00      | 48.00         | 1.00       |
| 1401.00 | 48.00 | 117.00 | 180.00   | 36.11 | 4.00  | 1.00      | 3.00      | 2.00           | 0.00    | 0.00         | 1.00   | 3.00   | 9.00         | 0.00       | 1.00   | 32.00         | 1.00      | 4.00       | 1.00    | 12.00      | 48.00         | 1.00       |
| 1402.00 | 45.00 | 103.00 | 182.00   | 31.10 | 4.00  | 1.00      | 3.00      | 2.00           | 1.00    | 1.00         | 1.00   | 2.00   | 9.00         | 25.71      | 1.00   | 32.00         | 1.00      | 6.00       | 0.00    | 16.00      | 64.00         | 0.00       |
| 1403.00 | 49.00 | 68.00  | 162.00   | 25.91 | 3.00  | 1.00      | 2.00      | 2.00           | 0.00    | 0.00         | 0.00   | 3.00   | 8.00         | 13.43      | 1.00   | 29.00         | 0.00      | 6.00       | 0.00    | 17.00      | 68.00         | 0.00       |
| 1404.00 | 45.00 | 91.00  | 181.00   | 27.78 | 3.00  | 1.00      | 2.00      | 2.00           | 1.00    | 1.00         | 1.00   | 2.00   | 10.00        | 64.29      | 1.00   | 44.00         | 1.00      | 2.00       | 1.00    | 12.00      | 48.00         | 1.00       |
| 1405.00 | 56.00 | 66.00  | 159.00   | 26.11 | 3.00  | 1.00      | 2.00      | 3.00           | 1.00    | 0.00         | 0.00   | 3.00   | 11.00        | 0.00       | 1.00   | 19.00         | 0.00      | 9.00       | 0.00    | 8.00       | 32.00         | 1.00       |
| 1406.00 | 55.00 | 95.00  | 178.00   | 29.98 | 3.00  | 1.00      | 2.00      | 2.00           | 1.00    | 0.00         | 1.00   | 3.00   | 9.00         | 45.00      | 1.00   | 30.00         | 1.00      | 2.00       | 1.00    | 17.00      | 68.00         | 0.00       |
| 1407.00 | 49.00 | 89.00  | 180.00   | 27.47 | 3.00  | 1.00      | 2.00      | 2.00           | 1.00    | 0.00         | 1.00   | 3.00   | 11.00        | 8.57       | 1.00   | 26.00         | 0.00      | 3.00       | 1.00    | 13.00      | 52.00         | 0.00       |
| 1408.00 | 48.00 | 102.00 | 186.00   | 29.48 | 3.00  | 1.00      | 2.00      | 2.00           | 1.00    | 1.00         | 1.00   | 1.00   | 8.00         | 17.14      | 1.00   | 31.00         | 1.00      | 0.00       | 1.00    | 16.00      | 64.00         | 0.00       |
| 1409.00 | 45.00 | 105.00 | 192.00   | 28.48 | 3.00  | 1.00      | 2.00      | 2.00           | 1.00    | 1.00         | 1.00   | 2.00   | 7.00         | 17.14      | 1.00   | 29.00         | 0.00      | 8.00       | 0.00    | 9.00       | 36.00         | 1.00       |
| 1410.00 | 46.00 | 85.00  | 175.00   | 27.76 | 3.00  | 0.00      | 2.00      | 2.00           | 0.00    | 1.00         | 1.00   | 2.00   | 5.00         | 17.14      | 1.00   | 23.00         | 0.00      | 6.00       | 0.00    | 12.00      | 48.00         | 1.00       |
| 1411.00 | 49.00 | 85.00  | 170.00   | 29.41 | 3.00  | 1.00      | 2.00      | 2.00           | 1.00    | 1.00         | 1.00   | 2.00   | 7.00         | 5.00       | 1.00   | 24.00         | 0.00      | 5.00       | 1.00    | 13.00      | 52.00         | 0.00       |
| 1412.00 | 54.00 | 85.00  | 174.00   | 28.08 | 3.00  | 1.00      | 3.00      | 2.00           | 0.00    | 0.00         | 1.00   | 3.00   | 6.00         | 0.00       | 1.00   | 28.00         | 0.00      | 7.00       | 0.00    | 10.00      | 40.00         | 1.00       |
| 1413.00 | 45.00 | 77.00  | 167.00   | 27.61 | 3.00  | 1.00      | 3.00      | 2.00           | 0.00    | 0.00         | 1.00   | 3.00   | 3.00         | 17.14      | 1.00   | 32.00         | 1.00      | 0.00       | 1.00    | 17.00      | 68.00         | 0.00       |
| 1414.00 | 46.00 | 63.00  | 155.00   | 26.22 | 3.00  | 1.00      | 3.00      | 2.00           | 1.00    | 1.00         | 0.00   | 3.00   | 9.00         | 34.29      | 1.00   | 21.00         | 0.00      | 3.00       | 1.00    | 16.00      | 64.00         | 0.00       |
| 1415.00 | 50.00 | 75.00  | 183.00   | 22.40 | 2.00  | 1.00      | 1.00      | 2.00           | 1.00    | 1.00         | 1.00   | 1.00   | 4.00         | 51.43      | 1.00   | 27.00         | 0.00      | 8.00       | 0.00    | 8.00       | 32.00         | 1.00       |
| 1416.00 | 45.00 | 60.00  | 170.00   | 20.76 | 2.00  | 1.00      | 2.00      | 2.00           | 1.00    | 0.00         | 1.00   | 3.00   | 11.00        | 25.71      | 1.00   | 34.00         | 1.00      | 3.00       | 1.00    | 20.00      | 80.00         | 0.00       |
| 1417.00 | 62.00 | 52.00  | 158.00   | 20.83 | 2.00  | 1.00      | 2.00      | 2.00           | 0.00    | 0.00         | 0.00   | 2.00   | 9.00         | 17.14      | 1.00   | 32.00         | 1.00      | 9.00       | 0.00    | 12.00      | 48.00         | 1.00       |
| 1418.00 | 52.00 | 68.00  | 169.00   | 23.81 | 2.00  | 1.00      | 2.00      | 2.00           | 0.00    | 0.00         | 0.00   | 2.00   | 4.50         | 26.43      | 1.00   | 36.00         | 1.00      | 3.00       | 1.00    | 17.00      | 68.00         | 0.00       |
| 1419.00 | 49.00 | 71.00  | 170.00   | 24.57 | 2.00  | 1.00      | 2.00      | 2.00           | 0.00    | 0.00         | 1.00   | 3.00   | 2.00         | 35.71      | 1.00   | 33.00         | 1.00      | 3.00       | 1.00    | 15.00      | 60.00         | 0.00       |
| 1420.00 | 50.00 | 80.00  | 180.00   | 24.69 | 2.00  | 1.00      | 2.00      | 2.00           | 0.00    | 1.00         | 1.00   | 2.00   | 7.00         | 17.14      | 1.00   | 28.00         | 0.00      | 7.00       | 0.00    | 12.00      | 48.00         | 1.00       |
| 1421.00 | 57.00 | 67.00  | 169.00   | 23.46 | 2.00  | 1.00      | 2.00      | 2.00           | 0.00    | 1.00         | 1.00   | 2.00   | 4.00         | 51.43      | 1.00   | 35.00         | 1.00      | 9.00       | 0.00    | 15.00      | 60.00         | 0.00       |
| 1422.00 | 47.00 | 58.00  | 167.00   | 20.80 | 2.00  | 1.00      | 3.00      | 1.00           | 1.00    | 0.00         | 0.00   | 3.00   | 7.00         | 12.86      | 1.00   | 38.00         | 1.00      | 5.00       | 1.00    | 13.00      | 52.00         | 0.00       |
| 1423.00 | 50.00 | 75.00  | 180.00   | 23.15 | 2.00  | 1.00      | 3.00      | 2.00           | 1.00    | 0.00         | 1.00   | 3.00   | 7.00         | 65.71      | 1.00   | 35.00         | 1.00      | 2.00       | 1.00    | 16.00      | 64.00         | 0.00       |
| 1424.00 | 50.00 | 110.00 | 173.00   | 36.75 | 4.00  | 1.00      | 2.00      | 2.00           | 0.00    | 1.00         | 1.00   | 1.00   | 6.50         | 51.43      | 1.00   | 28.00         | 0.00      | 6.00       | 0.00    | 10.00      | 40.00         | 1.00       |
| 1425.00 | 45.00 | 70.00  | 152.00   | 30.30 | 4.00  | 1.00      | 2.00      | 2.00           | 0.00    | 1.00         | 0.00   | 2.00   | 5.00         | 19.29      | 1.00   | 32.00         | 1.00      | 6.00       | 0.00    | 11.00      | 44.00         | 1.00       |
| 1426.00 | 48.00 | 115.00 | 172.00   | 38.87 | 4.00  | 1.00      | 2.00      | 2.00           | 1.00    | 1.00         | 1.00   | 3.00   | 10.00        | 17.14      | 1.00   | 29.00         | 0.00      | 12.00      | 0.00    | 13.00      | 52.00         | 0.00       |
| 1427.00 | 50.00 | 95.00  | 180.00   | 29.32 | 3.00  | 1.00      | 2.00      | 2.00           | 0.00    | 0.00         | 1.00   | 3.00   | 5.00         | 8.57       | 1.00   | 29.00         | 0.00      | 2.00       | 1.00    | 15.00      | 60.00         | 0.00       |
| 1428.00 | 47.00 | 77.00  | 170.00   | 26.64 | 3.00  | 1.00      | 2.00      | 2.00           | 0.00    | 0.00         | 1.00   | 3.00   | 10.00        | 5.71       | 1.00   | 37.00         | 1.00      | 2.00       | 1.00    | 16.00      | 64.00         | 0.00       |
| 1429.00 | 72.00 | 75.00  | 172.00   | 25.35 | 3.00  | 1.00      | 2.00      | 2.00           | 0.00    | 1.00         | 1.00   | 2.00   | 4.50         | 19.29      | 1.00   | 30.00         | 1.00      | 7.00       | 0.00    | 12.00      | 48.00         | 1.00       |
| 1430.00 | 55.00 | 80.00  | 172.00   | 27.04 | 3.00  | 1.00      | 2.00      | 2.00           | 1.00    | 1.00         | 1.00   | 2.00   | 9.00         | 11.43      | 1.00   | 26.00         | 0.00      | 0.00       | 1.00    | 19.00      | 76.00         | 0.00       |
| 1431.00 | 52.00 | 78.00  | 171.00   | 26.67 | 3.00  | 1.00      | 3.00      | 2.00           | 1.00    | 1.00         | 1.00   | 2.00   | 9.00         | 0.00       | 1.00   | 28.00         | 0.00      | 6.00       | 0.00    | 17.00      | 68.00         | 0.00       |
| 1432.00 | 52.00 | 78.00  | 171.00   | 26.67 | 3.00  | 1.00      | 3.00      | 2.00           | 1.00    | 1.00         | 1.00   | 2.00   | 9.00         | 0.00       | 1.00   | 28.00         | 0.00      | 6.00       | 0.00    | 17.00      | 68.00         | 0.00       |
| 1433.00 | 47.00 | 67.00  | 173.00   | 22.39 | 2.00  | 1.00      | 2.00      | 2.00           | 0.00    | 0.00         | 0.00   | 3.00   | 4.00         | 27.86      | 1.00   | 38.00         | 1.00      | 4.00       | 1.00    | 18.00      | 72.00         | 0.00       |
| 1434.00 | 61.00 | 71.00  | 170.00   | 24.57 | 2.00  | 1.00      | 2.00      | 2.00           | 1.00    | 1.00         | 1.00   | 3.00   | 6.00         | 21.43      | 1.00   | 28.00         | 0.00      | 6.00       | 0.00    | 21.00      | 84.00         | 0.00       |
| 1435.00 | 54.00 | 62.00  | 175.00   | 20.24 | 2.00  | 1.00      | 3.00      | 2.00           | 0.00    | 0.00         | 1.00   | 3.00   | 7.00         | 38.57      | 1.00   | 36.00         | 1.00      | 3.00       | 1.00    | 14.00      | 56.00         | 0.00       |
| 1436.00 | 47.00 | 87.00  | 160.00   | 33.98 | 4.00  | 0.00      | 1.00      | 2.00           | 1.00    | 1.00         | 1.00   | 2.00   | 1.50         | 60.00      | 1.00   | 38.00         | 1.00      | 8.00       | 0.00    | 18.00      | 72.00         | 0.00       |
| 1437.00 | 50.00 | 100.00 | 181.00   | 30.52 | 4.00  | 1.00      | 2.00      | 1.00           | 1.00    | 0.00         | 1.00   | 3.00   | 7.00         | 60.00      | 1.00   | 35.00         | 1.00      | 3.00       | 1.00    | 13.00      | 52.00         | 0.00       |
| 1438.00 | 52.00 | 98.00  | 185.00   | 28.63 | 3.00  | 0.00      | 1.00      | 2.00           | 0.00    | 1.00         | 1.00   | 3.00   | 5.00         | 0.00       | 1.00   | 30.00         | 1.00      | 6.00       | 0.00    | 13.00      | 52.00         | 0.00       |
| 1439.00 | 52.00 | 98.00  | 185.00   | 28.63 | 3.00  | 0.00      | 1.00      | 2.00           | 0.00    | 1.00         | 1.00   | 3.00   | 5.00         | 0.00       | 1.00   | 30.00         | 1.00      | 6.00       | 0.00    | 13.00      | 52.00         | 0.00       |
| 1440.00 | 50.00 | 83.00  | 173.00   | 27.73 | 3.00  | 1.00      | 1.00      | 2.00           | 0.00    | 1.00         | 1.00   | 3.00   | 8.00         | 21.43      | 1.00   | 33.00         | 1.00      | 6.00       | 0.00    | 14.00      | 56.00         | 0.00       |
| 1441.00 | 60.00 | 85.00  | 170.00</ |       |       |           |           |                |         |              |        |        |              |            |        |               |           |            |         |            |               |            |

| Subject | Age   | Weight | Height | BMI     | BMI_C | Residence | Education | Marital_Status | Smoking | Chronic_Dise | Gender | Health | Sitting_Time | PA_Min_Day | IPAQ_C | Dietary_Score | Dietary_C | PSQI_Total | Sleep_C | WHO5_Total | WHO5_Total100 | WHO5_Class |
|---------|-------|--------|--------|---------|-------|-----------|-----------|----------------|---------|--------------|--------|--------|--------------|------------|--------|---------------|-----------|------------|---------|------------|---------------|------------|
| 1453.00 | 52.00 | 125.00 | 165.00 | 45.91   | 4.00  | 1.00      | 2.00      | 2.00           | 0.00    | 1.00         | 0.00   | 1.00   | 6.00         | 0.00       | 1.00   | 27.00         | 0.00      | 9.00       | 0.00    | 9.00       | 36.00         | 1.00       |
| 1454.00 | 55.00 | 102.00 | 178.00 | 32.19   | 4.00  | 1.00      | 2.00      | 2.00           | 1.00    | 1.00         | 0.00   | 2.00   | 6.00         | 0.00       | 1.00   | 25.00         | 0.00      | 13.00      | 0.00    | 9.00       | 36.00         | 1.00       |
| 1455.00 | 50.00 | 80.00  | 160.00 | 31.25   | 4.00  | 1.00      | 2.00      | 2.00           | 0.00    | 1.00         | 0.00   | 2.00   | 6.00         | 0.00       | 1.00   | 27.00         | 0.00      | 5.00       | 1.00    | 12.00      | 48.00         | 1.00       |
| 1456.00 | 53.00 | 80.00  | 168.00 | 28.34   | 3.00  | 1.00      | 2.00      | 2.00           | 0.00    | 1.00         | 0.00   | 2.00   | 10.00        | 21.43      | 1.00   | 37.00         | 1.00      | 3.00       | 1.00    | 14.00      | 56.00         | 0.00       |
| 1457.00 | 53.00 | 81.00  | 168.00 | 28.70   | 3.00  | 1.00      | 2.00      | 2.00           | 0.00    | 0.00         | 0.00   | 3.00   | 6.00         | 25.00      | 1.00   | 30.00         | 1.00      | 9.00       | 0.00    | 10.00      | 40.00         | 1.00       |
| 1458.00 | 48.00 | 65.00  | 158.00 | 26.04   | 3.00  | 1.00      | 2.00      | 2.00           | 0.00    | 0.00         | 0.00   | 3.00   | 2.00         | 4.29       | 1.00   | 29.00         | 0.00      | 1.00       | 1.00    | 17.00      | 68.00         | 0.00       |
| 1459.00 | 50.00 | 83.00  | 170.00 | 28.72   | 3.00  | 1.00      | 2.00      | 2.00           | 0.00    | 1.00         | 0.00   | 3.00   | 11.00        | 34.29      | 1.00   | 31.00         | 1.00      | 3.00       | 1.00    | 15.00      | 60.00         | 0.00       |
| 1460.00 | 54.00 | 78.00  | 167.00 | 27.97   | 3.00  | 1.00      | 2.00      | 2.00           | 0.00    | 1.00         | 0.00   | 3.00   | 5.00         | 8.57       | 1.00   | 29.00         | 0.00      | 9.00       | 0.00    | 16.00      | 64.00         | 0.00       |
| 1461.00 | 55.00 | 80.00  | 170.00 | 27.68   | 3.00  | 1.00      | 2.00      | 2.00           | 0.00    | 1.00         | 0.00   | 3.00   | 11.00        | 14.29      | 1.00   | 37.00         | 1.00      | 1.00       | 1.00    | 16.00      | 64.00         | 0.00       |
| 1462.00 | 63.00 | 63.00  | 163.00 | 23.71   | 2.00  | 1.00      | 1.00      | 2.00           | 0.00    | 1.00         | 0.00   | 1.00   | 2.00         | 0.00       | 1.00   | 28.00         | 0.00      | 8.00       | 0.00    | 10.00      | 40.00         | 1.00       |
| 1463.00 | 45.00 | 68.00  | 168.00 | 24.09   | 2.00  | 1.00      | 2.00      | 3.00           | 0.00    | 1.00         | 0.00   | 3.00   | 7.00         | 26.43      | 1.00   | 32.00         | 1.00      | 4.00       | 1.00    | 14.00      | 56.00         | 0.00       |
| 1464.00 | 50.00 | 68.00  | 165.00 | 24.98   | 2.00  | 1.00      | 2.00      | 2.00           | 0.00    | 0.00         | 0.00   | 3.00   | 5.00         | 0.00       | 1.00   | 26.00         | 0.00      | 3.00       | 1.00    | 18.00      | 72.00         | 0.00       |
| 1465.00 | 45.00 | 60.00  | 162.00 | 22.86   | 2.00  | 1.00      | 2.00      | 2.00           | 0.00    | 0.00         | 0.00   | 3.00   | 6.00         | 51.43      | 1.00   | 31.00         | 1.00      | 8.00       | 0.00    | 16.00      | 64.00         | 0.00       |
| 1466.00 | 50.00 | 54.00  | 153.00 | 23.07   | 2.00  | 1.00      | 2.00      | 2.00           | 0.00    | 0.00         | 0.00   | 3.00   | 1.00         | 34.29      | 1.00   | 38.00         | 1.00      | 3.00       | 1.00    | 18.00      | 72.00         | 0.00       |
| 1467.00 | 63.00 | 64.00  | 162.00 | 24.39   | 2.00  | 1.00      | 2.00      | 2.00           | 0.00    | 1.00         | 0.00   | 1.00   | 1.50         | 8.57       | 1.00   | 35.00         | 1.00      | 6.00       | 0.00    | 14.00      | 56.00         | 0.00       |
| 1468.00 | 53.00 | 55.00  | 160.00 | 21.48   | 2.00  | 1.00      | 2.00      | 3.00           | 1.00    | 1.00         | 0.00   | 2.00   | 7.00         | 2.86       | 1.00   | 29.00         | 0.00      | 5.00       | 1.00    | 17.00      | 68.00         | 0.00       |
| 1469.00 | 55.00 | 88.00  | 175.00 | 28.73   | 3.00  | 1.00      | 2.00      | 2.00           | 0.00    | 0.00         | 1.00   | 3.00   | 8.00         | 32.14      | 1.00   | 27.00         | 0.00      | 4.00       | 1.00    | 21.00      | 84.00         | 0.00       |
| 1470.00 | 46.00 | 77.00  | 176.00 | 24.86   | 2.00  | 1.00      | 2.00      | 2.00           | 1.00    | 1.00         | 1.00   | 2.00   | 5.00         | 42.86      | 1.00   | 25.00         | 0.00      | 6.00       | 0.00    | 15.00      | 60.00         | 0.00       |
| 1471.00 | 46.00 | 100.00 | 178.00 | 31.56   | 4.00  | 1.00      | 2.00      | 2.00           | 1.00    | 1.00         | 1.00   | 2.00   | 4.00         | 11.43      | 1.00   | 30.00         | 1.00      | 8.00       | 0.00    | 12.00      | 48.00         | 1.00       |
| 1472.00 | 52.00 | 118.00 | 179.00 | 36.83   | 4.00  | 1.00      | 2.00      | 2.00           | 0.00    | 0.00         | 1.00   | 3.00   | 2.00         | 27.14      | 1.00   | 30.00         | 1.00      | 2.00       | 1.00    | 19.00      | 76.00         | 0.00       |
| 1473.00 | 61.00 | 90.00  | 172.00 | 30.42   | 4.00  | 1.00      | 2.00      | 2.00           | 0.00    | 0.00         | 1.00   | 3.00   | 2.00         | 20.00      | 1.00   | 40.00         | 1.00      | 3.00       | 1.00    | 15.00      | 60.00         | 0.00       |
| 1474.00 | 46.00 | 110.00 | 173.00 | 36.75   | 4.00  | 1.00      | 3.00      | 2.00           | 0.00    | 1.00         | 1.00   | 1.00   | 6.00         | 34.29      | 1.00   | 31.00         | 1.00      | 2.00       | 1.00    | 17.00      | 68.00         | 0.00       |
| 1475.00 | 63.00 | 82.00  | 162.00 | 31.25   | 4.00  | 1.00      | 3.00      | 2.00           | 0.00    | 1.00         | 0.00   | 3.00   | 8.00         | 5.71       | 1.00   | 35.00         | 1.00      | 8.00       | 0.00    | 13.00      | 52.00         | 0.00       |
| 1476.00 | 75.00 | 112.00 | 175.00 | 36.57   | 4.00  | 1.00      | 3.00      | 2.00           | 0.00    | 1.00         | 1.00   | 3.00   | 5.00         | 0.00       | 1.00   | 38.00         | 1.00      | 4.00       | 1.00    | 14.00      | 56.00         | 0.00       |
| 1477.00 | 71.00 | 90.00  | 183.00 | 26.87   | 3.00  | 1.00      | 2.00      | 2.00           | 1.00    | 1.00         | 1.00   | 2.00   | 3.50         | 38.57      | 1.00   | 25.00         | 0.00      | 8.00       | 0.00    | 17.00      | 68.00         | 0.00       |
| 1478.00 | 70.00 | 75.00  | 173.00 | 25.06   | 3.00  | 1.00      | 2.00      | 2.00           | 1.00    | 1.00         | 1.00   | 2.00   | 4.00         | 10.71      | 1.00   | 37.00         | 1.00      | 5.00       | 1.00    | 16.00      | 64.00         | 0.00       |
| 1479.00 | 68.00 | 94.00  | 183.00 | 28.07   | 3.00  | 1.00      | 3.00      | 2.00           | 0.00    | 0.00         | 1.00   | 3.00   | 6.00         | 48.57      | 1.00   | 40.00         | 1.00      | 7.00       | 0.00    | 14.00      | 56.00         | 0.00       |
| 1480.00 | 70.00 | 83.00  | 170.00 | 28.72   | 3.00  | 1.00      | 3.00      | 2.00           | 1.00    | 1.00         | 1.00   | 2.00   | 4.00         | 0.00       | 1.00   | 32.00         | 1.00      | 9.00       | 0.00    | 12.00      | 48.00         | 1.00       |
| 1481.00 | 56.00 | 85.00  | 171.00 | 29.07   | 3.00  | 1.00      | 2.00      | 2.00           | 0.00    | 1.00         | 0.00   | 2.00   | 5.00         | 17.14      | 1.00   | 37.00         | 1.00      | 8.00       | 0.00    | 16.00      | 64.00         | 0.00       |
| 1482.00 | 56.00 | 118.00 | 178.00 | 37.24   | 4.00  | 1.00      | 1.00      | 2.00           | 1.00    | 0.00         | 1.00   | 2.00   | 3.00         | 0.00       | 1.00   | 24.00         | 0.00      | 6.00       | 0.00    | 15.00      | 60.00         | 0.00       |
| 1483.00 | 58.00 | 85.00  | 156.00 | 34.93   | 4.00  | 1.00      | 2.00      | 2.00           | 0.00    | 0.00         | 0.00   | 1.00   | 6.00         | 51.43      | 1.00   | 39.00         | 1.00      | 1.00       | 1.00    | 19.00      | 76.00         | 0.00       |
| 1484.00 | 52.00 | 100.00 | 168.00 | 35.43   | 4.00  | 1.00      | 2.00      | 1.00           | 0.00    | 0.00         | 0.00   | 3.00   | 6.50         | 0.00       | 1.00   | 35.00         | 1.00      | 7.00       | 0.00    | 10.00      | 40.00         | 1.00       |
| 1485.00 | 66.00 | 100.10 | 180.30 | 30.79   | 4.00  | 1.00      | 2.00      | 2.00           | 0.00    | 0.00         | 0.00   | 3.00   | 11.00        | 60.00      | 1.00   | 30.00         | 1.00      | 0.00       | 1.00    | 17.00      | 68.00         | 0.00       |
| 1486.00 | 56.00 | 95.00  | 174.00 | 31.38   | 4.00  | 1.00      | 2.00      | 2.00           | 0.00    | 0.00         | 1.00   | 3.00   | 6.00         | 13.43      | 1.00   | 26.00         | 0.00      | 10.00      | 0.00    | 17.00      | 68.00         | 0.00       |
| 1487.00 | 54.00 | 108.00 | 176.00 | 34.87   | 4.00  | 0.00      | 2.00      | 3.00           | 1.00    | 1.00         | 1.00   | 1.00   | 5.50         | 0.00       | 1.00   | 31.00         | 1.00      | 8.00       | 0.00    | 14.00      | 56.00         | 0.00       |
| 1488.00 | 65.00 | 90.00  | 173.00 | 30.07   | 4.00  | 1.00      | 2.00      | 2.00           | 0.00    | 1.00         | 0.00   | 2.00   | 4.00         | 0.00       | 1.00   | 36.00         | 1.00      | 12.00      | 0.00    | 7.00       | 28.00         | 1.00       |
| 1489.00 | 45.00 | 100.00 | 180.00 | 30.86   | 4.00  | 1.00      | 2.00      | 3.00           | 1.00    | 1.00         | 1.00   | 3.00   | 7.00         | 21.43      | 1.00   | 30.00         | 1.00      | 13.00      | 0.00    | 12.00      | 48.00         | 1.00       |
| 1490.00 | 45.00 | 113.00 | 186.00 | 32.66   | 4.00  | 1.00      | 2.00      | 2.00           | 1.00    | 1.00         | 1.00   | 3.00   | 10.00        | 0.00       | 1.00   | 32.00         | 1.00      | 8.00       | 0.00    | 5.00       | 20.00         | 1.00       |
| 1491.00 | 60.00 | 98.00  | 178.00 | 30.93   | 4.00  | 1.00      | 3.00      | 2.00           | 0.00    | 1.00         | 1.00   | 1.00   | 4.50         | 0.00       | 1.00   | 26.00         | 0.00      | 8.00       | 0.00    | 15.00      | 60.00         | 0.00       |
| 1492.00 | 61.00 | 77.00  | 160.00 | 30.08   | 4.00  | 1.00      | 3.00      | 2.00           | 0.00    | 1.00         | 0.00   | 2.00   | 3.50         | 0.00       | 1.00   | 34.00         | 1.00      | 6.00       | 0.00    | 12.00      | 48.00         | 1.00       |
| 1493.00 | 58.00 | 100.00 | 180.00 | 30.86   | 4.00  | 1.00      | 3.00      | 2.00           | 0.00    | 1.00         | 1.00   | 3.00   | 4.00         | 0.86       | 1.00   | 31.00         | 1.00      | 8.00       | 0.00    | 15.00      | 60.00         | 0.00       |
| 1494.00 | 47.00 | 80.00  | 172.00 | 27.04   | 3.00  | 1.00      | 1.00      | 2.00           | 1.00    | 0.00         | 1.00   | 2.00   | 8.00         | 38.57      | 1.00   | 26.00         | 0.00      | 5.00       | 1.00    | 13.00      | 52.00         | 0.00       |
| 1495.00 | 55.00 | 88.00  | 175.00 | 28.73   | 3.00  | 0.00      | 1.00      | 2.00           | 1.00    | 1.00         | 1.00   | 2.00   | 8.00         | 17.14      | 1.00   | 23.00         | 0.00      | 4.00       | 1.00    | 14.00      | 56.00         | 0.00       |
| 1496.00 | 50.00 | 75.00  | 160.00 | 29.30   | 3.00  | 1.00      | 2.00      | 2.00           | 0.00    | 0.00         | 0.00   | 2.00   | 6.50         | 1.00       | 1.00   | 22.00         | 0.00      | 10.00      | 0.00    | 11.00      | 44.00         | 1.00       |
| 1497.00 | 50.00 | 83.00  | 178.00 | 26.20   | 3.00  | 1.00      | 2.00      | 2.00           | 0.00    | 0.00         | 1.00   | 3.00   | 7.00         | 25.71      | 1.00   | 33.00         | 1.00      | 5.00       | 1.00    | 11.00      | 44.00         | 1.00       |
| 1498.00 | 57.00 | 95.00  | 181.00 | 29.00   | 3.00  | 1.00      | 2.00      | 2.00           | 1.00    | 0.00         | 1.00   | 1.00   | 7.00         | 2.86       | 1.00   | 24.00         | 0.00      | 7.00       | 0.00    | 9.00       | 36.00         | 1.00       |
| 1499.00 | 55.00 | 82.00  | 180.00 | 25.31   | 3.00  | 1.00      | 2.00      | 2.00           | 0.00    | 0.00         | 1.00   | 2.00   | 7.00         | 11.43      | 1.00   | 24.00         | 0.00      | 4.00       | 1.00    | 9.00       | 36.00         | 1.00       |
| 1500.00 | 57.00 | 75.00  | 160.00 | 29.30   | 3.00  | 1.00      | 2.00      | 2.00           | 0.00    | 0.00         | 0.00   | 2.00   | 5.00         | 0.00       | 1.00   | 35.00         | 1.00      | 4.00       | 1.00    | 13.00      | 52.00         | 0.00       |
| 1501.00 | 46.00 | 70.00  | 157.00 | 28.40   | 3.00  | 0.00      | 2.00      | 2.00           | 0.00    | 0.00         | 1.00   | 3.00   | 7.00         | 15.00      | 1.00   | 32.00         | 1.00      | 7.00       | 0.00    | 18.00      | 72.00         | 0.00       |
| 1502.00 | 55.00 | 87.00  | 180.00 | 26.85   | 3.00  | 1.00      | 2.00      | 2.00           | 0.00    | 1.00         | 1.00   | 1.00   | 8.00         | 17.14      | 1.00   | 39.00         | 1.00      | 9.00       | 0.00    | 2.00       | 8.00          | 1.00       |
| 1503.00 | 60.00 | 80.00  | 176.00 | 25.83   | 3.00  | 1.00      | 2.00      | 2.00           | 1.00    | 1.00         | 1.00   | 1.00   | 6.00         | 8.57       | 1.00   | 31.00         | 1.00      | 1.00       | 1.00    | 11.00      | 44.00         | 1.00       |
| 1504.00 | 57.00 | 85.00  | 175.00 | 27.76   | 3.00  | 1.00      | 2.00      | 2.00           | 1.00    | 1.00         | 1.00   | 2.00   | 10.00        | 8.57       | 1.00   | 32.00         | 1.00      | 7.00       | 0.00    | 11.00      | 44.00         | 1.00       |
| 1505.00 | 50.00 | 82.00  | 175.00 | 26.78   | 3.00  | 1.00      | 2.00      | 2.00           | 1.00    | 1.00         | 1.00   | 2.00   | 5.00         | 19.29      | 1.00   | 29.00         | 0.00      | 4.00       | 1.00    | 15.00      | 60.00         | 0.00       |
| 1506.00 | 57.00 | 85.00  | 175.00 | 27.76   | 3.00  | 1.00      | 2.00      | 2.00           | 1.00    | 1.00         | 1.00   | 2.00   | 9.00         | 8.57       | 1.00   | 32.00         | 1.00      | 6.00       | 0.00    | 12.00      | 48.00         | 1.00       |
| 1507.00 | 46.00 | 80.00  | 176.00 | 25.83</ |       |           |           |                |         |              |        |        |              |            |        |               |           |            |         |            |               |            |

| Subject | Age   | Weight | Height | BMI   | BMI_C | Residence | Education | Marital_Status | Smoking | Chronic_Dise | Gender | Health | Sitting_Time | PA_Min_Day | IPAQ_C | Dietary_Score | Dietary_C | PSQI_Total | Sleep_C | WHO5_Total | WHO5_Total100 | WHO5_Class |
|---------|-------|--------|--------|-------|-------|-----------|-----------|----------------|---------|--------------|--------|--------|--------------|------------|--------|---------------|-----------|------------|---------|------------|---------------|------------|
| 1519.00 | 45.00 | 63.00  | 165.00 | 23.14 | 2.00  | 1.00      | 2.00      | 2.00           | 0.00    | 0.00         | 1.00   | 3.00   | 10.00        | 11.43      | 1.00   | 35.00         | 1.00      | 7.00       | 0.00    | 14.00      | 56.00         | 0.00       |
| 1520.00 | 54.00 | 86.00  | 186.00 | 24.86 | 2.00  | 1.00      | 2.00      | 2.00           | 0.00    | 0.00         | 1.00   | 3.00   | 8.00         | 20.71      | 1.00   | 35.00         | 1.00      | 3.00       | 1.00    | 13.00      | 52.00         | 0.00       |
| 1521.00 | 52.00 | 75.00  | 174.00 | 24.77 | 2.00  | 1.00      | 2.00      | 3.00           | 0.00    | 0.00         | 1.00   | 3.00   | 6.00         | 57.14      | 1.00   | 29.00         | 0.00      | 1.00       | 1.00    | 16.00      | 64.00         | 0.00       |
| 1522.00 | 53.00 | 62.00  | 159.00 | 24.52 | 2.00  | 1.00      | 2.00      | 2.00           | 1.00    | 1.00         | 1.00   | 2.00   | 7.00         | 0.00       | 1.00   | 22.00         | 0.00      | 10.00      | 0.00    | 14.00      | 56.00         | 0.00       |
| 1523.00 | 49.00 | 76.00  | 170.00 | 26.30 | 3.00  | 0.00      | 3.00      | 2.00           | 0.00    | 0.00         | 0.00   | 3.00   | 3.00         | 25.71      | 1.00   | 30.00         | 1.00      | 0.00       | 1.00    | 21.00      | 84.00         | 0.00       |
| 1524.00 | 53.00 | 80.00  | 175.00 | 26.12 | 3.00  | 1.00      | 3.00      | 2.00           | 0.00    | 1.00         | 0.00   | 3.00   | 4.50         | 10.00      | 1.00   | 38.00         | 1.00      | 4.00       | 1.00    | 17.00      | 68.00         | 0.00       |
| 1525.00 | 47.00 | 77.00  | 186.00 | 22.26 | 2.00  | 1.00      | 2.00      | 2.00           | 0.00    | 0.00         | 0.00   | 2.00   | 2.00         | 0.00       | 1.00   | 31.00         | 1.00      | 5.00       | 1.00    | 9.00       | 36.00         | 1.00       |
| 1526.00 | 47.00 | 73.00  | 173.00 | 24.39 | 2.00  | 1.00      | 2.00      | 2.00           | 0.00    | 0.00         | 1.00   | 3.00   | 7.00         | 3.57       | 1.00   | 28.00         | 0.00      | 8.00       | 0.00    | 10.00      | 40.00         | 1.00       |
| 1527.00 | 58.00 | 105.00 | 180.00 | 32.41 | 4.00  | 1.00      | 2.00      | 2.00           | 1.00    | 0.00         | 1.00   | 3.00   | 5.50         | 2.14       | 1.00   | 24.00         | 0.00      | 5.00       | 1.00    | 10.00      | 40.00         | 1.00       |
| 1528.00 | 47.00 | 100.00 | 170.00 | 34.60 | 4.00  | 1.00      | 3.00      | 2.00           | 0.00    | 0.00         | 1.00   | 1.00   | 7.00         | 10.71      | 1.00   | 23.00         | 0.00      | 3.00       | 1.00    | 9.00       | 36.00         | 1.00       |
| 1529.00 | 51.00 | 102.00 | 171.00 | 34.88 | 4.00  | 1.00      | 3.00      | 2.00           | 0.00    | 0.00         | 0.00   | 1.00   | 9.00         | 21.43      | 1.00   | 41.00         | 1.00      | 0.00       | 1.00    | 19.00      | 76.00         | 0.00       |
| 1530.00 | 48.00 | 92.00  | 174.00 | 30.39 | 4.00  | 1.00      | 3.00      | 2.00           | 1.00    | 0.00         | 1.00   | 2.00   | 10.00        | 64.29      | 1.00   | 27.00         | 0.00      | 3.00       | 1.00    | 11.00      | 44.00         | 1.00       |
| 1531.00 | 57.00 | 79.00  | 158.00 | 31.65 | 4.00  | 1.00      | 3.00      | 3.00           | 0.00    | 0.00         | 0.00   | 2.00   | 9.00         | 8.57       | 1.00   | 29.00         | 0.00      | 12.00      | 0.00    | 11.00      | 44.00         | 1.00       |
| 1532.00 | 52.00 | 90.00  | 160.00 | 35.16 | 4.00  | 1.00      | 3.00      | 2.00           | 0.00    | 0.00         | 0.00   | 2.00   | 4.00         | 2.86       | 1.00   | 35.00         | 1.00      | 7.00       | 0.00    | 11.00      | 44.00         | 1.00       |
| 1533.00 | 55.00 | 100.00 | 180.00 | 30.86 | 4.00  | 1.00      | 3.00      | 2.00           | 0.00    | 0.00         | 1.00   | 2.00   | 6.00         | 0.00       | 1.00   | 31.00         | 1.00      | 1.00       | 1.00    | 15.00      | 60.00         | 0.00       |
| 1534.00 | 56.00 | 100.00 | 170.00 | 34.60 | 4.00  | 1.00      | 3.00      | 2.00           | 0.00    | 0.00         | 0.00   | 2.00   | 7.00         | 15.71      | 1.00   | 29.00         | 0.00      | 7.00       | 0.00    | 12.00      | 48.00         | 1.00       |
| 1535.00 | 50.00 | 109.00 | 177.00 | 34.79 | 4.00  | 1.00      | 3.00      | 2.00           | 0.00    | 0.00         | 1.00   | 2.00   | 7.00         | 4.29       | 1.00   | 31.00         | 1.00      | 3.00       | 1.00    | 13.00      | 52.00         | 0.00       |
| 1536.00 | 52.00 | 80.00  | 160.00 | 31.25 | 4.00  | 1.00      | 3.00      | 2.00           | 0.00    | 0.00         | 0.00   | 2.00   | 4.50         | 38.57      | 1.00   | 30.00         | 1.00      | 4.00       | 1.00    | 15.00      | 60.00         | 0.00       |
| 1537.00 | 51.00 | 89.00  | 169.00 | 31.16 | 4.00  | 1.00      | 3.00      | 2.00           | 0.00    | 0.00         | 1.00   | 3.00   | 7.00         | 11.43      | 1.00   | 22.00         | 0.00      | 4.00       | 1.00    | 11.00      | 44.00         | 1.00       |
| 1538.00 | 46.00 | 92.00  | 174.00 | 30.39 | 4.00  | 1.00      | 3.00      | 3.00           | 0.00    | 0.00         | 1.00   | 3.00   | 8.00         | 12.86      | 1.00   | 35.00         | 1.00      | 6.00       | 0.00    | 10.00      | 40.00         | 1.00       |
| 1539.00 | 50.00 | 83.00  | 162.00 | 31.63 | 4.00  | 1.00      | 3.00      | 2.00           | 0.00    | 0.00         | 0.00   | 3.00   | 6.00         | 17.14      | 1.00   | 31.00         | 1.00      | 5.00       | 1.00    | 13.00      | 52.00         | 0.00       |
| 1540.00 | 53.00 | 95.00  | 173.00 | 31.74 | 4.00  | 0.00      | 3.00      | 2.00           | 0.00    | 0.00         | 1.00   | 3.00   | 5.50         | 0.00       | 1.00   | 29.00         | 0.00      | 5.00       | 1.00    | 9.00       | 36.00         | 1.00       |
| 1541.00 | 47.00 | 112.00 | 183.00 | 33.44 | 4.00  | 1.00      | 3.00      | 2.00           | 0.00    | 0.00         | 1.00   | 3.00   | 5.00         | 34.29      | 1.00   | 37.00         | 1.00      | 2.00       | 1.00    | 16.00      | 64.00         | 0.00       |
| 1542.00 | 50.00 | 90.00  | 170.00 | 31.14 | 4.00  | 1.00      | 3.00      | 2.00           | 0.00    | 0.00         | 1.00   | 3.00   | 6.00         | 14.29      | 1.00   | 30.00         | 1.00      | 3.00       | 1.00    | 12.00      | 48.00         | 1.00       |
| 1543.00 | 45.00 | 130.00 | 193.00 | 34.90 | 4.00  | 1.00      | 3.00      | 2.00           | 0.00    | 0.00         | 1.00   | 3.00   | 4.00         | 55.71      | 1.00   | 33.00         | 1.00      | 0.00       | 1.00    | 13.00      | 52.00         | 0.00       |
| 1544.00 | 46.00 | 70.00  | 147.00 | 32.39 | 4.00  | 1.00      | 3.00      | 2.00           | 0.00    | 0.00         | 0.00   | 3.00   | 7.00         | 1.43       | 1.00   | 31.00         | 1.00      | 4.00       | 1.00    | 16.00      | 64.00         | 0.00       |
| 1545.00 | 66.00 | 89.00  | 168.00 | 31.53 | 4.00  | 1.00      | 3.00      | 2.00           | 0.00    | 0.00         | 1.00   | 3.00   | 6.00         | 12.86      | 1.00   | 29.00         | 0.00      | 3.00       | 1.00    | 23.00      | 92.00         | 0.00       |
| 1546.00 | 49.00 | 100.00 | 181.00 | 30.52 | 4.00  | 1.00      | 3.00      | 2.00           | 1.00    | 0.00         | 1.00   | 3.00   | 5.00         | 42.86      | 1.00   | 37.00         | 1.00      | 3.00       | 1.00    | 13.00      | 52.00         | 0.00       |
| 1547.00 | 54.00 | 89.00  | 170.00 | 30.80 | 4.00  | 1.00      | 3.00      | 2.00           | 0.00    | 0.00         | 1.00   | 3.00   | 8.00         | 12.86      | 1.00   | 37.00         | 1.00      | 4.00       | 1.00    | 14.00      | 56.00         | 0.00       |
| 1548.00 | 57.00 | 88.00  | 165.00 | 32.32 | 4.00  | 0.00      | 3.00      | 2.00           | 0.00    | 0.00         | 1.00   | 3.00   | 4.50         | 12.86      | 1.00   | 38.00         | 1.00      | 5.00       | 1.00    | 16.00      | 64.00         | 0.00       |
| 1549.00 | 60.00 | 85.00  | 160.00 | 33.20 | 4.00  | 1.00      | 3.00      | 2.00           | 0.00    | 0.00         | 0.00   | 3.00   | 9.00         | 0.00       | 1.00   | 31.00         | 1.00      | 6.00       | 0.00    | 15.00      | 60.00         | 0.00       |
| 1550.00 | 57.00 | 98.00  | 175.00 | 32.00 | 4.00  | 1.00      | 3.00      | 2.00           | 0.00    | 0.00         | 1.00   | 3.00   | 5.50         | 0.00       | 1.00   | 31.00         | 1.00      | 2.00       | 1.00    | 13.00      | 52.00         | 0.00       |
| 1551.00 | 56.00 | 104.00 | 173.00 | 34.75 | 4.00  | 1.00      | 3.00      | 2.00           | 1.00    | 1.00         | 1.00   | 1.00   | 11.00        | 22.86      | 1.00   | 26.00         | 0.00      | 9.00       | 0.00    | 6.00       | 24.00         | 1.00       |
| 1552.00 | 56.00 | 100.00 | 182.00 | 30.19 | 4.00  | 1.00      | 3.00      | 2.00           | 1.00    | 1.00         | 1.00   | 1.00   | 4.00         | 20.00      | 1.00   | 34.00         | 1.00      | 4.00       | 1.00    | 13.00      | 52.00         | 0.00       |
| 1553.00 | 49.00 | 85.00  | 155.00 | 35.38 | 4.00  | 1.00      | 3.00      | 2.00           | 0.00    | 1.00         | 0.00   | 1.00   | 11.00        | 4.29       | 1.00   | 26.00         | 0.00      | 5.00       | 1.00    | 17.00      | 68.00         | 0.00       |
| 1554.00 | 58.00 | 100.00 | 171.00 | 34.20 | 4.00  | 1.00      | 3.00      | 2.00           | 0.00    | 1.00         | 1.00   | 2.00   | 6.00         | 18.57      | 1.00   | 29.00         | 0.00      | 4.00       | 1.00    | 14.00      | 56.00         | 0.00       |
| 1555.00 | 45.00 | 107.00 | 176.00 | 34.54 | 4.00  | 1.00      | 3.00      | 2.00           | 0.00    | 1.00         | 1.00   | 2.00   | 6.50         | 2.14       | 1.00   | 30.00         | 1.00      | 7.00       | 0.00    | 12.00      | 48.00         | 1.00       |
| 1556.00 | 53.00 | 71.00  | 152.00 | 30.73 | 4.00  | 0.00      | 3.00      | 2.00           | 0.00    | 1.00         | 0.00   | 2.00   | 3.50         | 24.29      | 1.00   | 21.00         | 0.00      | 7.00       | 0.00    | 12.00      | 48.00         | 1.00       |
| 1557.00 | 54.00 | 84.00  | 167.00 | 30.12 | 4.00  | 1.00      | 3.00      | 2.00           | 1.00    | 1.00         | 1.00   | 2.00   | 2.00         | 0.00       | 1.00   | 28.00         | 0.00      | 7.00       | 0.00    | 12.00      | 48.00         | 1.00       |
| 1558.00 | 56.00 | 93.00  | 165.00 | 34.16 | 4.00  | 1.00      | 3.00      | 2.00           | 0.00    | 1.00         | 0.00   | 2.00   | 6.00         | 17.14      | 1.00   | 38.00         | 1.00      | 6.00       | 0.00    | 19.00      | 76.00         | 0.00       |
| 1559.00 | 47.00 | 115.00 | 191.00 | 31.52 | 4.00  | 1.00      | 3.00      | 2.00           | 0.00    | 1.00         | 1.00   | 2.00   | 8.00         | 0.00       | 1.00   | 32.00         | 1.00      | 6.00       | 0.00    | 14.00      | 56.00         | 0.00       |
| 1560.00 | 55.00 | 110.00 | 180.00 | 33.95 | 4.00  | 1.00      | 3.00      | 2.00           | 0.00    | 1.00         | 1.00   | 2.00   | 4.00         | 42.86      | 1.00   | 32.00         | 1.00      | 3.00       | 1.00    | 12.00      | 48.00         | 1.00       |
| 1561.00 | 46.00 | 87.00  | 165.00 | 31.96 | 4.00  | 1.00      | 3.00      | 2.00           | 1.00    | 1.00         | 1.00   | 2.00   | 9.00         | 8.57       | 1.00   | 34.00         | 1.00      | 3.00       | 1.00    | 16.00      | 64.00         | 0.00       |
| 1562.00 | 49.00 | 100.00 | 180.00 | 30.86 | 4.00  | 1.00      | 3.00      | 2.00           | 1.00    | 1.00         | 1.00   | 2.00   | 5.00         | 58.57      | 1.00   | 31.00         | 1.00      | 3.00       | 1.00    | 17.00      | 68.00         | 0.00       |
| 1563.00 | 54.00 | 100.00 | 168.00 | 35.43 | 4.00  | 1.00      | 3.00      | 2.00           | 1.00    | 1.00         | 1.00   | 3.00   | 11.00        | 0.00       | 1.00   | 32.00         | 1.00      | 6.00       | 0.00    | 12.00      | 48.00         | 1.00       |
| 1564.00 | 46.00 | 80.00  | 155.00 | 33.30 | 4.00  | 1.00      | 3.00      | 2.00           | 0.00    | 1.00         | 0.00   | 3.00   | 5.00         | 2.86       | 1.00   | 24.00         | 0.00      | 1.00       | 1.00    | 14.00      | 56.00         | 0.00       |
| 1565.00 | 45.00 | 80.00  | 160.00 | 31.25 | 4.00  | 1.00      | 3.00      | 2.00           | 1.00    | 1.00         | 0.00   | 3.00   | 9.00         | 25.71      | 1.00   | 33.00         | 1.00      | 4.00       | 1.00    | 16.00      | 64.00         | 0.00       |
| 1566.00 | 48.00 | 95.00  | 176.00 | 30.67 | 4.00  | 0.00      | 3.00      | 2.00           | 0.00    | 1.00         | 1.00   | 3.00   | 5.00         | 37.14      | 1.00   | 33.00         | 1.00      | 0.00       | 1.00    | 14.00      | 56.00         | 0.00       |
| 1567.00 | 56.00 | 95.00  | 178.00 | 29.98 | 3.00  | 1.00      | 2.00      | 2.00           | 0.00    | 0.00         | 1.00   | 3.00   | 9.00         | 5.71       | 1.00   | 30.00         | 1.00      | 5.00       | 1.00    | 13.00      | 52.00         | 0.00       |
| 1568.00 | 50.00 | 80.00  | 170.00 | 27.68 | 3.00  | 1.00      | 2.00      | 3.00           | 1.00    | 1.00         | 1.00   | 2.00   | 5.00         | 64.29      | 1.00   | 34.00         | 1.00      | 5.00       | 1.00    | 11.00      | 44.00         | 1.00       |
| 1569.00 | 47.00 | 68.00  | 158.00 | 27.24 | 3.00  | 1.00      | 3.00      | 2.00           | 0.00    | 0.00         | 0.00   | 1.00   | 5.00         | 1.43       | 1.00   | 23.00         | 0.00      | 2.00       | 1.00    | 14.00      | 56.00         | 0.00       |
| 1570.00 | 50.00 | 67.00  | 156.00 | 27.53 | 3.00  | 1.00      | 3.00      | 2.00           | 0.00    | 0.00         | 0.00   | 1.00   | 6.00         | 12.86      | 1.00   | 32.00         | 1.00      | 2.00       | 1.00    | 14.00      | 56.00         | 0.00       |
| 1571.00 | 45.00 | 67.00  | 162.00 | 25.53 | 3.00  | 1.00      | 3.00      | 2.00           | 0.00    | 0.00         | 0.00   | 2.00   | 4.00         | 34.29      | 1.00   | 21.00         | 0.00      | 3.00       | 1.00    | 12.00      | 48.00         | 1.00       |
| 1572.00 | 66.00 | 79.00  | 170.00 | 27.34 | 3.00  | 1.00      | 3.00      | 2.00           | 0.00    | 0.00         | 1.00   | 2.00   | 8.00         | 40.00      | 1.00   | 33.00         | 1.00      | 7.00       | 0.00    | 12.00      | 48.00         | 1.00       |
| 1573.00 | 60.00 | 83.00  | 172.00 |       |       |           |           |                |         |              |        |        |              |            |        |               |           |            |         |            |               |            |



| Subject | Age   | Weight | Height | BMI   | BMI_C | Residence | Education | Marital_Status | Smoking | Chronic_Dise | Gender | Health | Sitting_Time | PA_Min_Day | IPAQ_C | Dietary_Score | Dietary_C | PSQI_Total | Sleep_C | WHO5_Total | WHO5_Total100 | WHO5_Class |
|---------|-------|--------|--------|-------|-------|-----------|-----------|----------------|---------|--------------|--------|--------|--------------|------------|--------|---------------|-----------|------------|---------|------------|---------------|------------|
| 1585.00 | 49.00 | 80.00  | 171.00 | 27.36 | 3.00  | 1.00      | 3.00      | 2.00           | 0.00    | 0.00         | 0.00   | 3.00   | 6.00         | 38.57      | 1.00   | 31.00         | 1.00      | 8.00       | 0.00    | 13.00      | 52.00         | 0.00       |
| 1586.00 | 53.00 | 77.00  | 167.00 | 27.61 | 3.00  | 1.00      | 3.00      | 2.00           | 0.00    | 0.00         | 0.00   | 3.00   | 5.00         | 47.86      | 1.00   | 30.00         | 1.00      | 5.00       | 1.00    | 9.00       | 36.00         | 1.00       |
| 1587.00 | 61.00 | 108.00 | 195.00 | 28.40 | 3.00  | 1.00      | 3.00      | 3.00           | 0.00    | 0.00         | 1.00   | 3.00   | 1.50         | 21.43      | 1.00   | 29.00         | 0.00      | 8.00       | 0.00    | 10.00      | 40.00         | 1.00       |
| 1588.00 | 50.00 | 69.00  | 162.00 | 26.29 | 3.00  | 1.00      | 3.00      | 3.00           | 0.00    | 0.00         | 0.00   | 3.00   | 6.00         | 12.86      | 1.00   | 28.00         | 0.00      | 10.00      | 0.00    | 10.00      | 40.00         | 1.00       |
| 1589.00 | 60.00 | 85.00  | 169.00 | 29.76 | 3.00  | 1.00      | 3.00      | 2.00           | 0.00    | 0.00         | 1.00   | 3.00   | 10.00        | 17.14      | 1.00   | 35.00         | 1.00      | 0.00       | 1.00    | 17.00      | 68.00         | 0.00       |
| 1590.00 | 65.00 | 86.00  | 179.00 | 26.84 | 3.00  | 1.00      | 3.00      | 2.00           | 0.00    | 0.00         | 1.00   | 3.00   | 3.00         | 22.86      | 1.00   | 23.00         | 0.00      | 2.00       | 1.00    | 18.00      | 72.00         | 0.00       |
| 1591.00 | 53.00 | 75.00  | 160.00 | 29.30 | 3.00  | 1.00      | 3.00      | 3.00           | 0.00    | 0.00         | 0.00   | 3.00   | 2.50         | 11.43      | 1.00   | 30.00         | 1.00      | 2.00       | 1.00    | 15.00      | 60.00         | 0.00       |
| 1592.00 | 49.00 | 100.00 | 188.00 | 28.29 | 3.00  | 1.00      | 3.00      | 2.00           | 0.00    | 0.00         | 1.00   | 3.00   | 7.00         | 15.00      | 1.00   | 30.00         | 1.00      | 6.00       | 0.00    | 15.00      | 60.00         | 0.00       |
| 1593.00 | 47.00 | 75.00  | 160.00 | 29.30 | 3.00  | 1.00      | 3.00      | 3.00           | 0.00    | 0.00         | 0.00   | 3.00   | 4.00         | 0.00       | 1.00   | 25.00         | 0.00      | 2.00       | 1.00    | 15.00      | 60.00         | 0.00       |
| 1594.00 | 55.00 | 86.00  | 174.00 | 28.41 | 3.00  | 1.00      | 3.00      | 2.00           | 0.00    | 0.00         | 1.00   | 3.00   | 7.00         | 8.57       | 1.00   | 29.00         | 0.00      | 4.00       | 1.00    | 17.00      | 68.00         | 0.00       |
| 1595.00 | 70.00 | 70.00  | 155.00 | 29.14 | 3.00  | 1.00      | 3.00      | 2.00           | 0.00    | 0.00         | 0.00   | 3.00   | 5.00         | 17.14      | 1.00   | 36.00         | 1.00      | 3.00       | 1.00    | 13.00      | 52.00         | 0.00       |
| 1596.00 | 52.00 | 75.00  | 172.00 | 25.35 | 3.00  | 1.00      | 3.00      | 2.00           | 0.00    | 0.00         | 0.00   | 3.00   | 10.00        | 0.00       | 1.00   | 30.00         | 1.00      | 2.00       | 1.00    | 13.00      | 52.00         | 0.00       |
| 1597.00 | 54.00 | 81.00  | 178.00 | 25.56 | 3.00  | 1.00      | 3.00      | 2.00           | 0.00    | 0.00         | 1.00   | 3.00   | 5.50         | 21.43      | 1.00   | 26.00         | 0.00      | 0.00       | 1.00    | 17.00      | 68.00         | 0.00       |
| 1598.00 | 55.00 | 80.00  | 173.00 | 26.73 | 3.00  | 1.00      | 3.00      | 2.00           | 0.00    | 0.00         | 1.00   | 3.00   | 6.00         | 55.71      | 1.00   | 33.00         | 1.00      | 6.00       | 0.00    | 12.00      | 48.00         | 1.00       |
| 1599.00 | 69.00 | 90.00  | 180.00 | 27.78 | 3.00  | 1.00      | 3.00      | 2.00           | 0.00    | 0.00         | 1.00   | 3.00   | 7.00         | 30.00      | 1.00   | 35.00         | 1.00      | 3.00       | 1.00    | 17.00      | 68.00         | 0.00       |
| 1600.00 | 55.00 | 83.00  | 180.00 | 25.62 | 3.00  | 1.00      | 3.00      | 2.00           | 0.00    | 0.00         | 1.00   | 3.00   | 5.00         | 55.71      | 1.00   | 38.00         | 1.00      | 1.00       | 1.00    | 19.00      | 76.00         | 0.00       |
| 1601.00 | 65.00 | 73.00  | 165.00 | 26.81 | 3.00  | 1.00      | 3.00      | 2.00           | 0.00    | 0.00         | 1.00   | 3.00   | 6.00         | 51.43      | 1.00   | 34.00         | 1.00      | 5.00       | 1.00    | 15.00      | 60.00         | 0.00       |
| 1602.00 | 64.00 | 84.00  | 172.00 | 28.39 | 3.00  | 1.00      | 3.00      | 3.00           | 0.00    | 0.00         | 1.00   | 3.00   | 5.00         | 31.43      | 1.00   | 34.00         | 1.00      | 4.00       | 1.00    | 18.00      | 72.00         | 0.00       |
| 1603.00 | 50.00 | 94.00  | 185.00 | 27.47 | 3.00  | 1.00      | 3.00      | 2.00           | 0.00    | 0.00         | 1.00   | 3.00   | 5.50         | 25.71      | 1.00   | 20.00         | 0.00      | 2.00       | 1.00    | 21.00      | 84.00         | 0.00       |
| 1604.00 | 48.00 | 75.00  | 162.00 | 28.58 | 3.00  | 1.00      | 3.00      | 3.00           | 0.00    | 1.00         | 0.00   | 1.00   | 6.00         | 0.00       | 1.00   | 26.00         | 0.00      | 7.00       | 0.00    | 9.00       | 36.00         | 1.00       |
| 1605.00 | 59.00 | 74.00  | 165.00 | 27.18 | 3.00  | 1.00      | 3.00      | 1.00           | 0.00    | 1.00         | 0.00   | 1.00   | 4.50         | 25.00      | 1.00   | 30.00         | 1.00      | 9.00       | 0.00    | 15.00      | 60.00         | 0.00       |
| 1606.00 | 46.00 | 85.00  | 178.00 | 26.83 | 3.00  | 1.00      | 3.00      | 2.00           | 1.00    | 1.00         | 1.00   | 1.00   | 3.00         | 51.43      | 1.00   | 34.00         | 1.00      | 6.00       | 0.00    | 13.00      | 52.00         | 0.00       |
| 1607.00 | 59.00 | 89.00  | 175.00 | 29.06 | 3.00  | 1.00      | 3.00      | 3.00           | 1.00    | 1.00         | 1.00   | 1.00   | 7.00         | 43.57      | 1.00   | 22.00         | 0.00      | 11.00      | 0.00    | 15.00      | 60.00         | 0.00       |
| 1608.00 | 45.00 | 85.00  | 174.00 | 28.08 | 3.00  | 1.00      | 3.00      | 1.00           | 1.00    | 1.00         | 1.00   | 1.00   | 6.00         | 37.14      | 1.00   | 25.00         | 0.00      | 4.00       | 1.00    | 15.00      | 60.00         | 0.00       |
| 1609.00 | 53.00 | 85.00  | 178.00 | 26.83 | 3.00  | 1.00      | 3.00      | 2.00           | 1.00    | 1.00         | 1.00   | 1.00   | 9.00         | 12.86      | 1.00   | 29.00         | 0.00      | 4.00       | 1.00    | 15.00      | 60.00         | 0.00       |
| 1610.00 | 56.00 | 88.00  | 178.00 | 27.77 | 3.00  | 1.00      | 3.00      | 2.00           | 0.00    | 1.00         | 1.00   | 2.00   | 5.00         | 20.00      | 1.00   | 32.00         | 1.00      | 3.00       | 1.00    | 10.00      | 40.00         | 1.00       |
| 1611.00 | 54.00 | 92.00  | 183.00 | 27.47 | 3.00  | 1.00      | 3.00      | 2.00           | 0.00    | 1.00         | 1.00   | 2.00   | 4.50         | 0.00       | 1.00   | 34.00         | 1.00      | 7.00       | 0.00    | 12.00      | 48.00         | 1.00       |
| 1612.00 | 54.00 | 76.00  | 160.00 | 29.69 | 3.00  | 1.00      | 3.00      | 2.00           | 0.00    | 1.00         | 0.00   | 2.00   | 7.00         | 0.00       | 1.00   | 35.00         | 1.00      | 10.00      | 0.00    | 9.00       | 36.00         | 1.00       |
| 1613.00 | 50.00 | 100.00 | 195.00 | 26.30 | 3.00  | 1.00      | 3.00      | 2.00           | 1.00    | 1.00         | 1.00   | 2.00   | 8.00         | 0.00       | 1.00   | 32.00         | 1.00      | 7.00       | 0.00    | 9.00       | 36.00         | 1.00       |
| 1614.00 | 54.00 | 80.00  | 165.00 | 29.38 | 3.00  | 0.00      | 3.00      | 2.00           | 1.00    | 1.00         | 1.00   | 2.00   | 6.00         | 30.00      | 1.00   | 31.00         | 1.00      | 7.00       | 0.00    | 12.00      | 48.00         | 1.00       |
| 1615.00 | 50.00 | 95.00  | 178.00 | 29.98 | 3.00  | 0.00      | 3.00      | 2.00           | 1.00    | 1.00         | 1.00   | 2.00   | 5.00         | 4.29       | 1.00   | 33.00         | 1.00      | 9.00       | 0.00    | 15.00      | 60.00         | 0.00       |
| 1616.00 | 65.00 | 73.00  | 165.00 | 26.81 | 3.00  | 1.00      | 3.00      | 2.00           | 1.00    | 1.00         | 1.00   | 2.00   | 6.00         | 10.71      | 1.00   | 32.00         | 1.00      | 6.00       | 0.00    | 12.00      | 48.00         | 1.00       |
| 1617.00 | 45.00 | 75.00  | 163.00 | 28.23 | 3.00  | 1.00      | 3.00      | 2.00           | 0.00    | 1.00         | 0.00   | 3.00   | 10.00        | 2.86       | 1.00   | 26.00         | 0.00      | 13.00      | 0.00    | 10.00      | 40.00         | 1.00       |
| 1618.00 | 56.00 | 95.00  | 182.00 | 28.68 | 3.00  | 1.00      | 3.00      | 2.00           | 0.00    | 1.00         | 1.00   | 3.00   | 8.00         | 12.86      | 1.00   | 29.00         | 0.00      | 3.00       | 1.00    | 10.00      | 40.00         | 1.00       |
| 1619.00 | 60.00 | 90.00  | 178.00 | 28.41 | 3.00  | 1.00      | 3.00      | 2.00           | 0.00    | 1.00         | 1.00   | 3.00   | 5.00         | 8.57       | 1.00   | 32.00         | 1.00      | 5.00       | 1.00    | 18.00      | 72.00         | 0.00       |
| 1620.00 | 62.00 | 85.00  | 172.00 | 28.73 | 3.00  | 1.00      | 3.00      | 2.00           | 1.00    | 1.00         | 1.00   | 3.00   | 8.00         | 34.29      | 1.00   | 33.00         | 1.00      | 4.00       | 1.00    | 18.00      | 72.00         | 0.00       |
| 1621.00 | 52.00 | 88.00  | 172.00 | 29.75 | 3.00  | 1.00      | 3.00      | 2.00           | 0.00    | 1.00         | 1.00   | 3.00   | 5.00         | 42.86      | 1.00   | 34.00         | 1.00      | 4.00       | 1.00    | 14.00      | 56.00         | 0.00       |
| 1622.00 | 65.00 | 90.00  | 181.00 | 27.47 | 3.00  | 1.00      | 3.00      | 2.00           | 0.00    | 1.00         | 1.00   | 3.00   | 6.00         | 10.71      | 1.00   | 31.00         | 1.00      | 3.00       | 1.00    | 12.00      | 48.00         | 1.00       |
| 1623.00 | 64.00 | 84.00  | 182.00 | 25.36 | 3.00  | 1.00      | 3.00      | 2.00           | 0.00    | 1.00         | 1.00   | 3.00   | 4.00         | 31.43      | 1.00   | 38.00         | 1.00      | 4.00       | 1.00    | 14.00      | 56.00         | 0.00       |
| 1624.00 | 45.00 | 93.00  | 186.00 | 26.88 | 3.00  | 1.00      | 3.00      | 2.00           | 0.00    | 1.00         | 1.00   | 3.00   | 5.00         | 60.00      | 1.00   | 27.00         | 0.00      | 2.00       | 1.00    | 21.00      | 84.00         | 0.00       |
| 1625.00 | 45.00 | 67.00  | 169.00 | 23.46 | 2.00  | 1.00      | 3.00      | 2.00           | 1.00    | 0.00         | 0.00   | 2.00   | 8.00         | 32.14      | 1.00   | 32.00         | 1.00      | 4.00       | 1.00    | 9.00       | 36.00         | 1.00       |
| 1626.00 | 50.00 | 57.00  | 158.00 | 22.83 | 2.00  | 1.00      | 3.00      | 2.00           | 0.00    | 0.00         | 0.00   | 2.00   | 9.00         | 34.29      | 1.00   | 33.00         | 1.00      | 4.00       | 1.00    | 11.00      | 44.00         | 1.00       |
| 1627.00 | 46.00 | 70.00  | 178.00 | 22.09 | 2.00  | 1.00      | 3.00      | 2.00           | 1.00    | 0.00         | 1.00   | 2.00   | 8.00         | 2.14       | 1.00   | 21.00         | 0.00      | 6.00       | 0.00    | 12.00      | 48.00         | 1.00       |
| 1628.00 | 50.00 | 68.00  | 180.00 | 20.99 | 2.00  | 1.00      | 3.00      | 2.00           | 1.00    | 0.00         | 1.00   | 2.00   | 4.00         | 18.57      | 1.00   | 24.00         | 0.00      | 8.00       | 0.00    | 14.00      | 56.00         | 0.00       |
| 1629.00 | 47.00 | 63.00  | 165.00 | 23.14 | 2.00  | 0.00      | 3.00      | 2.00           | 1.00    | 0.00         | 0.00   | 2.00   | 10.00        | 0.00       | 1.00   | 32.00         | 1.00      | 8.00       | 0.00    | 12.00      | 48.00         | 1.00       |
| 1630.00 | 46.00 | 70.00  | 170.00 | 24.22 | 2.00  | 1.00      | 3.00      | 1.00           | 0.00    | 0.00         | 0.00   | 2.00   | 8.00         | 6.43       | 1.00   | 36.00         | 1.00      | 3.00       | 1.00    | 21.00      | 84.00         | 0.00       |
| 1631.00 | 51.00 | 68.00  | 173.00 | 22.72 | 2.00  | 1.00      | 3.00      | 2.00           | 0.00    | 0.00         | 0.00   | 3.00   | 4.00         | 0.00       | 1.00   | 34.00         | 1.00      | 4.00       | 1.00    | 16.00      | 64.00         | 0.00       |
| 1632.00 | 48.00 | 76.00  | 175.00 | 24.82 | 2.00  | 1.00      | 3.00      | 2.00           | 1.00    | 0.00         | 1.00   | 3.00   | 7.00         | 0.00       | 1.00   | 25.00         | 0.00      | 12.00      | 0.00    | 9.00       | 36.00         | 1.00       |
| 1633.00 | 50.00 | 55.00  | 160.00 | 21.48 | 2.00  | 1.00      | 3.00      | 2.00           | 0.00    | 0.00         | 0.00   | 3.00   | 6.00         | 0.00       | 1.00   | 29.00         | 0.00      | 3.00       | 1.00    | 13.00      | 52.00         | 0.00       |
| 1634.00 | 56.00 | 60.00  | 165.00 | 22.04 | 2.00  | 1.00      | 3.00      | 2.00           | 0.00    | 0.00         | 0.00   | 3.00   | 6.00         | 38.57      | 1.00   | 40.00         | 1.00      | 7.00       | 0.00    | 15.00      | 60.00         | 0.00       |
| 1635.00 | 60.00 | 66.00  | 165.00 | 24.24 | 2.00  | 1.00      | 3.00      | 2.00           | 0.00    | 0.00         | 1.00   | 3.00   | 5.00         | 12.86      | 1.00   | 32.00         | 1.00      | 3.00       | 1.00    | 15.00      | 60.00         | 0.00       |
| 1636.00 | 46.00 | 65.00  | 164.00 | 24.17 | 2.00  | 1.00      | 3.00      | 2.00           | 0.00    | 0.00         | 0.00   | 3.00   | 6.50         | 17.14      | 1.00   | 31.00         | 1.00      | 4.00       | 1.00    | 16.00      | 64.00         | 0.00       |
| 1637.00 | 46.00 | 83.00  | 185.00 | 24.25 | 2.00  | 1.00      | 3.00      | 2.00           | 1.00    | 1.00         | 1.00   | 1.00   | 11.00        | 4.29       | 1.00   | 32.00         | 1.00      | 10.00      | 0.00    | 16.00      | 64.00         | 0.00       |
| 1638.00 | 55.00 | 80.00  | 180.00 | 24.69 | 2.00  | 1.00      | 3.00      | 3.00           | 0.00    | 1.00         | 1.00   | 1.00   | 6.00         | 27.86      | 1.00   | 34.00         | 1.00      | 3.00       | 1.00    | 16.00      | 64.00         | 0.00       |
| 1639.00 | 52.00 | 75.00  | 174.00 | 24.77 |       |           |           |                |         |              |        |        |              |            |        |               |           |            |         |            |               |            |

| Subject | Age   | Weight | Height | BMI   | BMI_C | Residence | Education | Marital_Status | Smoking | Chronic_Dise | Gender | Health | Sitting_Time | PA_Min_Day | IPAQ_C | Dietary_Score | Dietary_C | PSQI_Total | Sleep_C | WHO5_Total | WHO5_Total100 | WHO5_Class |
|---------|-------|--------|--------|-------|-------|-----------|-----------|----------------|---------|--------------|--------|--------|--------------|------------|--------|---------------|-----------|------------|---------|------------|---------------|------------|
| 1651.00 | 59.00 | 90.00  | 158.00 | 36.05 | 4.00  | 1.00      | 2.00      | 2.00           | 0.00    | 1.00         | 0.00   | 2.00   | 3.00         | 0.00       | 1.00   | 35.00         | 1.00      | 8.00       | 0.00    | 10.00      | 40.00         | 1.00       |
| 1652.00 | 52.00 | 99.00  | 180.00 | 30.56 | 4.00  | 1.00      | 2.00      | 2.00           | 1.00    | 1.00         | 1.00   | 2.00   | 3.50         | 55.71      | 1.00   | 36.00         | 1.00      | 8.00       | 0.00    | 8.00       | 32.00         | 1.00       |
| 1653.00 | 52.00 | 102.00 | 173.00 | 34.08 | 4.00  | 1.00      | 2.00      | 2.00           | 1.00    | 1.00         | 1.00   | 2.00   | 5.00         | 27.86      | 1.00   | 33.00         | 1.00      | 9.00       | 0.00    | 12.00      | 48.00         | 1.00       |
| 1654.00 | 60.00 | 94.00  | 177.00 | 30.00 | 4.00  | 1.00      | 2.00      | 2.00           | 1.00    | 1.00         | 1.00   | 2.00   | 6.00         | 4.29       | 1.00   | 29.00         | 0.00      | 3.00       | 1.00    | 12.00      | 48.00         | 1.00       |
| 1655.00 | 47.00 | 162.00 | 184.00 | 47.85 | 4.00  | 1.00      | 2.00      | 2.00           | 1.00    | 1.00         | 1.00   | 2.00   | 8.00         | 8.57       | 1.00   | 30.00         | 1.00      | 11.00      | 0.00    | 12.00      | 48.00         | 1.00       |
| 1656.00 | 45.00 | 100.00 | 178.00 | 31.56 | 4.00  | 1.00      | 2.00      | 2.00           | 0.00    | 1.00         | 1.00   | 3.00   | 6.00         | 30.00      | 1.00   | 34.00         | 1.00      | 4.00       | 1.00    | 12.00      | 48.00         | 1.00       |
| 1657.00 | 51.00 | 100.00 | 159.00 | 39.56 | 4.00  | 1.00      | 3.00      | 1.00           | 0.00    | 0.00         | 0.00   | 3.00   | 8.00         | 17.14      | 1.00   | 22.00         | 0.00      | 2.00       | 1.00    | 19.00      | 76.00         | 0.00       |
| 1658.00 | 48.00 | 98.00  | 170.00 | 33.91 | 4.00  | 1.00      | 3.00      | 2.00           | 0.00    | 1.00         | 1.00   | 1.00   | 7.00         | 12.86      | 1.00   | 32.00         | 1.00      | 7.00       | 0.00    | 10.00      | 40.00         | 1.00       |
| 1659.00 | 46.00 | 100.00 | 181.00 | 30.52 | 4.00  | 1.00      | 3.00      | 2.00           | 0.00    | 1.00         | 1.00   | 2.00   | 6.00         | 10.71      | 1.00   | 27.00         | 0.00      | 8.00       | 0.00    | 13.00      | 52.00         | 0.00       |
| 1660.00 | 45.00 | 78.00  | 160.00 | 30.47 | 4.00  | 1.00      | 3.00      | 2.00           | 0.00    | 1.00         | 0.00   | 3.00   | 8.00         | 14.29      | 1.00   | 28.00         | 0.00      | 5.00       | 1.00    | 13.00      | 52.00         | 0.00       |
| 1661.00 | 50.00 | 105.00 | 182.00 | 31.70 | 4.00  | 1.00      | 3.00      | 2.00           | 0.00    | 1.00         | 1.00   | 3.00   | 11.00        | 0.00       | 1.00   | 25.00         | 0.00      | 4.00       | 1.00    | 12.00      | 48.00         | 1.00       |
| 1662.00 | 51.00 | 91.00  | 158.00 | 36.45 | 4.00  | 1.00      | 3.00      | 1.00           | 0.00    | 1.00         | 0.00   | 3.00   | 6.50         | 4.29       | 1.00   | 37.00         | 1.00      | 3.00       | 1.00    | 18.00      | 72.00         | 0.00       |
| 1663.00 | 49.00 | 76.00  | 173.00 | 25.39 | 3.00  | 0.00      | 2.00      | 2.00           | 0.00    | 0.00         | 1.00   | 3.00   | 8.00         | 6.43       | 1.00   | 23.00         | 0.00      | 6.00       | 0.00    | 17.00      | 68.00         | 0.00       |
| 1664.00 | 49.00 | 80.00  | 169.00 | 28.01 | 3.00  | 1.00      | 2.00      | 3.00           | 1.00    | 1.00         | 0.00   | 1.00   | 11.00        | 25.71      | 1.00   | 41.00         | 1.00      | 9.00       | 0.00    | 12.00      | 48.00         | 1.00       |
| 1665.00 | 50.00 | 71.00  | 156.00 | 29.17 | 3.00  | 1.00      | 2.00      | 2.00           | 0.00    | 1.00         | 0.00   | 3.00   | 3.50         | 4.29       | 1.00   | 32.00         | 1.00      | 9.00       | 0.00    | 10.00      | 40.00         | 1.00       |
| 1666.00 | 45.00 | 90.00  | 185.00 | 26.30 | 3.00  | 1.00      | 2.00      | 2.00           | 0.00    | 0.00         | 1.00   | 2.00   | 8.00         | 12.86      | 1.00   | 31.00         | 1.00      | 3.00       | 1.00    | 13.00      | 52.00         | 0.00       |
| 1667.00 | 46.00 | 78.00  | 164.00 | 29.00 | 3.00  | 1.00      | 2.00      | 2.00           | 0.00    | 0.00         | 0.00   | 3.00   | 2.50         | 0.00       | 1.00   | 29.00         | 0.00      | 7.00       | 0.00    | 7.00       | 28.00         | 1.00       |
| 1668.00 | 53.00 | 80.00  | 170.00 | 27.68 | 3.00  | 1.00      | 2.00      | 2.00           | 0.00    | 0.00         | 1.00   | 3.00   | 5.00         | 22.14      | 1.00   | 27.00         | 0.00      | 7.00       | 0.00    | 13.00      | 52.00         | 0.00       |
| 1669.00 | 48.00 | 88.00  | 177.00 | 28.09 | 3.00  | 1.00      | 2.00      | 2.00           | 0.00    | 0.00         | 1.00   | 3.00   | 6.00         | 17.14      | 1.00   | 28.00         | 0.00      | 7.00       | 0.00    | 10.00      | 40.00         | 1.00       |
| 1670.00 | 48.00 | 80.00  | 167.00 | 28.69 | 3.00  | 0.00      | 2.00      | 2.00           | 0.00    | 0.00         | 0.00   | 3.00   | 2.50         | 19.29      | 1.00   | 34.00         | 1.00      | 4.00       | 1.00    | 13.00      | 52.00         | 0.00       |
| 1671.00 | 61.00 | 75.00  | 173.00 | 25.06 | 3.00  | 1.00      | 2.00      | 2.00           | 1.00    | 1.00         | 1.00   | 1.00   | 7.00         | 4.29       | 1.00   | 34.00         | 1.00      | 5.00       | 1.00    | 13.00      | 52.00         | 0.00       |
| 1672.00 | 61.00 | 75.00  | 173.00 | 25.06 | 3.00  | 1.00      | 2.00      | 2.00           | 1.00    | 1.00         | 1.00   | 1.00   | 8.00         | 6.43       | 1.00   | 35.00         | 1.00      | 5.00       | 1.00    | 13.00      | 52.00         | 0.00       |
| 1673.00 | 51.00 | 85.00  | 175.00 | 27.76 | 3.00  | 1.00      | 2.00      | 2.00           | 0.00    | 1.00         | 1.00   | 2.00   | 3.00         | 0.00       | 1.00   | 19.00         | 0.00      | 7.00       | 0.00    | 4.00       | 16.00         | 1.00       |
| 1674.00 | 53.00 | 80.00  | 165.00 | 29.38 | 3.00  | 1.00      | 2.00      | 2.00           | 0.00    | 1.00         | 1.00   | 2.00   | 6.00         | 9.43       | 1.00   | 30.00         | 1.00      | 13.00      | 0.00    | 2.00       | 8.00          | 1.00       |
| 1675.00 | 60.00 | 75.00  | 168.00 | 26.57 | 3.00  | 1.00      | 2.00      | 3.00           | 0.00    | 1.00         | 0.00   | 2.00   | 11.00        | 11.43      | 1.00   | 40.00         | 1.00      | 7.00       | 0.00    | 15.00      | 60.00         | 0.00       |
| 1676.00 | 54.00 | 100.00 | 184.00 | 29.54 | 3.00  | 1.00      | 2.00      | 2.00           | 0.00    | 1.00         | 1.00   | 2.00   | 11.00        | 0.00       | 1.00   | 33.00         | 1.00      | 8.00       | 0.00    | 13.00      | 52.00         | 0.00       |
| 1677.00 | 45.00 | 90.00  | 184.00 | 26.58 | 3.00  | 1.00      | 2.00      | 2.00           | 1.00    | 1.00         | 1.00   | 2.00   | 10.00        | 0.00       | 1.00   | 20.00         | 0.00      | 8.00       | 0.00    | 11.00      | 44.00         | 1.00       |
| 1678.00 | 55.00 | 80.00  | 177.00 | 25.54 | 3.00  | 1.00      | 2.00      | 2.00           | 1.00    | 1.00         | 1.00   | 2.00   | 4.00         | 53.57      | 1.00   | 41.00         | 1.00      | 1.00       | 1.00    | 18.00      | 72.00         | 0.00       |
| 1679.00 | 52.00 | 78.00  | 174.00 | 25.76 | 3.00  | 1.00      | 2.00      | 2.00           | 0.00    | 1.00         | 1.00   | 3.00   | 4.00         | 34.29      | 1.00   | 30.00         | 1.00      | 7.00       | 0.00    | 10.00      | 40.00         | 1.00       |
| 1680.00 | 50.00 | 88.00  | 179.00 | 27.46 | 3.00  | 1.00      | 2.00      | 2.00           | 0.00    | 1.00         | 1.00   | 3.00   | 9.00         | 0.00       | 1.00   | 37.00         | 1.00      | 13.00      | 0.00    | 15.00      | 60.00         | 0.00       |
| 1681.00 | 49.00 | 74.00  | 170.00 | 25.61 | 3.00  | 1.00      | 3.00      | 2.00           | 0.00    | 0.00         | 0.00   | 3.00   | 4.00         | 4.29       | 1.00   | 31.00         | 1.00      | 7.00       | 0.00    | 16.00      | 64.00         | 0.00       |
| 1682.00 | 47.00 | 76.00  | 170.00 | 26.30 | 3.00  | 1.00      | 3.00      | 2.00           | 0.00    | 0.00         | 1.00   | 3.00   | 4.00         | 17.14      | 1.00   | 28.00         | 0.00      | 5.00       | 1.00    | 12.00      | 48.00         | 1.00       |
| 1683.00 | 68.00 | 74.00  | 165.00 | 27.18 | 3.00  | 1.00      | 3.00      | 2.00           | 1.00    | 1.00         | 1.00   | 1.00   | 7.00         | 17.14      | 1.00   | 35.00         | 1.00      | 8.00       | 0.00    | 12.00      | 48.00         | 1.00       |
| 1684.00 | 65.00 | 80.00  | 173.00 | 26.73 | 3.00  | 1.00      | 3.00      | 2.00           | 0.00    | 1.00         | 1.00   | 2.00   | 7.00         | 8.57       | 1.00   | 36.00         | 1.00      | 6.00       | 0.00    | 12.00      | 48.00         | 1.00       |
| 1685.00 | 45.00 | 64.00  | 169.00 | 22.41 | 2.00  | 1.00      | 2.00      | 2.00           | 0.00    | 0.00         | 1.00   | 2.00   | 4.00         | 22.86      | 1.00   | 32.00         | 1.00      | 4.00       | 1.00    | 13.00      | 52.00         | 0.00       |
| 1686.00 | 48.00 | 52.00  | 154.00 | 21.93 | 2.00  | 1.00      | 2.00      | 2.00           | 0.00    | 0.00         | 0.00   | 3.00   | 5.00         | 0.00       | 1.00   | 23.00         | 0.00      | 8.00       | 0.00    | 6.00       | 24.00         | 1.00       |
| 1687.00 | 48.00 | 78.00  | 186.00 | 22.55 | 2.00  | 1.00      | 2.00      | 2.00           | 0.00    | 0.00         | 1.00   | 3.00   | 6.00         | 19.29      | 1.00   | 24.00         | 0.00      | 6.00       | 0.00    | 10.00      | 40.00         | 1.00       |
| 1688.00 | 59.00 | 58.00  | 167.00 | 20.80 | 2.00  | 1.00      | 2.00      | 2.00           | 0.00    | 0.00         | 1.00   | 3.00   | 5.50         | 41.43      | 1.00   | 32.00         | 1.00      | 6.00       | 0.00    | 12.00      | 48.00         | 1.00       |
| 1689.00 | 45.00 | 87.00  | 190.00 | 24.10 | 2.00  | 1.00      | 2.00      | 2.00           | 1.00    | 1.00         | 1.00   | 2.00   | 5.00         | 42.86      | 1.00   | 26.00         | 0.00      | 2.00       | 1.00    | 15.00      | 60.00         | 0.00       |
| 1690.00 | 50.00 | 52.00  | 167.00 | 18.65 | 2.00  | 1.00      | 3.00      | 2.00           | 1.00    | 0.00         | 1.00   | 2.00   | 5.00         | 30.00      | 1.00   | 34.00         | 1.00      | 5.00       | 1.00    | 20.00      | 80.00         | 0.00       |
| 1691.00 | 50.00 | 75.00  | 178.00 | 23.67 | 2.00  | 1.00      | 3.00      | 2.00           | 0.00    | 0.00         | 1.00   | 3.00   | 4.00         | 55.71      | 1.00   | 27.00         | 0.00      | 8.00       | 0.00    | 16.00      | 64.00         | 0.00       |
| 1692.00 | 48.00 | 70.00  | 168.00 | 24.80 | 2.00  | 1.00      | 3.00      | 2.00           | 1.00    | 0.00         | 1.00   | 3.00   | 7.00         | 60.00      | 1.00   | 38.00         | 1.00      | 4.00       | 1.00    | 15.00      | 60.00         | 0.00       |
| 1693.00 | 67.00 | 100.00 | 171.00 | 34.20 | 4.00  | 1.00      | 1.00      | 2.00           | 1.00    | 1.00         | 1.00   | 1.00   | 11.00        | 0.00       | 1.00   | 21.00         | 0.00      | 9.00       | 0.00    | 9.00       | 36.00         | 1.00       |
| 1694.00 | 54.00 | 110.00 | 175.00 | 35.92 | 4.00  | 1.00      | 2.00      | 2.00           | 0.00    | 0.00         | 1.00   | 3.00   | 2.50         | 45.00      | 1.00   | 25.00         | 0.00      | 2.00       | 1.00    | 18.00      | 72.00         | 0.00       |
| 1695.00 | 62.00 | 105.00 | 182.00 | 31.70 | 4.00  | 1.00      | 2.00      | 3.00           | 0.00    | 0.00         | 1.00   | 3.00   | 4.00         | 12.86      | 1.00   | 38.00         | 1.00      | 3.00       | 1.00    | 15.00      | 60.00         | 0.00       |
| 1696.00 | 48.00 | 71.00  | 150.00 | 31.56 | 4.00  | 1.00      | 2.00      | 2.00           | 0.00    | 0.00         | 0.00   | 3.00   | 2.00         | 25.00      | 1.00   | 31.00         | 1.00      | 3.00       | 1.00    | 13.00      | 52.00         | 0.00       |
| 1697.00 | 60.00 | 100.00 | 174.00 | 33.03 | 4.00  | 0.00      | 2.00      | 2.00           | 1.00    | 1.00         | 1.00   | 1.00   | 7.00         | 8.57       | 1.00   | 24.00         | 0.00      | 9.00       | 0.00    | 13.00      | 52.00         | 0.00       |
| 1698.00 | 60.00 | 86.00  | 168.00 | 30.47 | 4.00  | 1.00      | 2.00      | 2.00           | 0.00    | 1.00         | 1.00   | 2.00   | 6.00         | 10.71      | 1.00   | 27.00         | 0.00      | 10.00      | 0.00    | 15.00      | 60.00         | 0.00       |
| 1699.00 | 58.00 | 96.00  | 176.00 | 30.99 | 4.00  | 1.00      | 2.00      | 2.00           | 0.00    | 1.00         | 1.00   | 3.00   | 4.00         | 17.14      | 1.00   | 30.00         | 1.00      | 4.00       | 1.00    | 16.00      | 64.00         | 0.00       |
| 1700.00 | 48.00 | 94.00  | 167.00 | 33.71 | 4.00  | 1.00      | 3.00      | 2.00           | 0.00    | 0.00         | 1.00   | 2.00   | 9.00         | 0.00       | 1.00   | 31.00         | 1.00      | 2.00       | 1.00    | 15.00      | 60.00         | 0.00       |
| 1701.00 | 48.00 | 103.00 | 160.00 | 40.23 | 4.00  | 1.00      | 3.00      | 1.00           | 0.00    | 0.00         | 0.00   | 3.00   | 4.00         | 0.00       | 1.00   | 27.00         | 0.00      | 4.00       | 1.00    | 14.00      | 56.00         | 0.00       |
| 1702.00 | 66.00 | 78.00  | 172.00 | 26.37 | 3.00  | 1.00      | 1.00      | 2.00           | 1.00    | 1.00         | 1.00   | 2.00   | 7.00         | 25.71      | 1.00   | 35.00         | 1.00      | 10.00      | 0.00    | 4.00       | 16.00         | 1.00       |
| 1703.00 | 70.00 | 85.00  | 175.00 | 27.76 | 3.00  | 1.00      | 1.00      | 2.00           | 1.00    | 1.00         | 1.00   | 2.00   | 6.50         | 2.86       | 1.00   | 31.00         | 1.00      | 6.00       | 0.00    | 15.00      | 60.00         | 0.00       |
| 1704.00 | 50.00 | 75.00  | 173.00 | 25.06 | 3.00  | 1.00      | 2.00      | 2.00           | 0.00    | 0.00         | 0.00   | 3.00   | 5.00         | 0.00       | 1.00   | 27.00         | 0.00      | 3.00       | 1.00    | 14.00      | 56.00         | 0.00       |
| 1705.00 | 78.00 | 75.00  | 160.00 | 29.30 |       |           |           |                |         |              |        |        |              |            |        |               |           |            |         |            |               |            |

| Subject | Age   | Weight | Height | BMI   | BMI_C | Residence | Education | Marital_Status | Smoking | Chronic_Dise | Gender | Health | Sitting_Time | PA_Min_Day | IPAQ_C | Dietary_Score | Dietary_C | PSQI_Total | Sleep_C | WHO5_Total | WHO5_Total100 | WHO5_Class |
|---------|-------|--------|--------|-------|-------|-----------|-----------|----------------|---------|--------------|--------|--------|--------------|------------|--------|---------------|-----------|------------|---------|------------|---------------|------------|
| 1717.00 | 66.00 | 68.00  | 168.00 | 24.09 | 2.00  | 1.00      | 2.00      | 2.00           | 0.00    | 0.00         | 1.00   | 3.00   | 10.00        | 36.43      | 1.00   | 36.00         | 1.00      | 3.00       | 1.00    | 15.00      | 60.00         | 0.00       |
| 1718.00 | 49.00 | 60.00  | 163.00 | 22.58 | 2.00  | 1.00      | 2.00      | 2.00           | 1.00    | 0.00         | 0.00   | 3.00   | 6.00         | 38.57      | 1.00   | 32.00         | 1.00      | 6.00       | 0.00    | 16.00      | 64.00         | 0.00       |
| 1719.00 | 46.00 | 78.00  | 178.00 | 24.62 | 2.00  | 1.00      | 2.00      | 2.00           | 1.00    | 0.00         | 1.00   | 3.00   | 6.00         | 30.00      | 1.00   | 29.00         | 0.00      | 4.00       | 1.00    | 11.00      | 44.00         | 1.00       |
| 1720.00 | 65.00 | 76.00  | 182.00 | 22.94 | 2.00  | 1.00      | 2.00      | 2.00           | 0.00    | 1.00         | 1.00   | 2.00   | 6.00         | 21.43      | 1.00   | 39.00         | 1.00      | 12.00      | 0.00    | 12.00      | 48.00         | 1.00       |
| 1721.00 | 53.00 | 57.00  | 165.00 | 20.94 | 2.00  | 1.00      | 2.00      | 3.00           | 0.00    | 1.00         | 0.00   | 2.00   | 5.00         | 141.43     | 1.00   | 33.00         | 1.00      | 12.00      | 0.00    | 15.00      | 60.00         | 0.00       |
| 1722.00 | 60.00 | 70.00  | 170.00 | 24.22 | 2.00  | 1.00      | 3.00      | 2.00           | 0.00    | 1.00         | 1.00   | 2.00   | 6.00         | 1.43       | 1.00   | 29.00         | 0.00      | 3.00       | 1.00    | 12.00      | 48.00         | 1.00       |
| 1723.00 | 73.00 | 70.00  | 170.00 | 24.22 | 2.00  | 1.00      | 3.00      | 2.00           | 1.00    | 1.00         | 1.00   | 3.00   | 4.00         | 17.14      | 1.00   | 33.00         | 1.00      | 7.00       | 0.00    | 15.00      | 60.00         | 0.00       |
